# Supplementary material for: A directing group switch in copper-catalyzed electrophilic C–H amination/migratory annulation cascade: divergent access to benzimidazolone/benzimidazole
Source: Royal Society of Chemistry journal article supplement (doi:10.1039/d2sc01420c), 2022-01-01

## Electronic Supplementary Information

### Directing group switch in copper-catalyzed electrophilic C–H amination/migratory annulation cascade: divergent access to benzimidazolone/benzimidazole

Hasina Mamataj Begam,<sup>a</sup> Shantanu Nandi,<sup>a</sup> and Ranjan Jana<sup>\*a</sup>

<sup>a</sup>Organic and Medicinal Chemistry Division, CSIR-Indian Institute of Chemical Biology

4 Raja S. C. Mullick Road, Jadavpur, Kolkata-700032, West Bengal, India

E-mail: rjana@iicb.res.in

## Table of Contents

|                                                                  |          |
|------------------------------------------------------------------|----------|
| General information.....                                         | S2       |
| Preparation of starting materials.....                           | S3-S10   |
| Optimization tables .....                                        | S10-S14  |
| Representative procedures for the main reactions.....            | S14-S16  |
| Deprotection of the heteroaryl from benzimidazolone product..... | S16-S17  |
| <sup>1</sup> H NMR spectra for mechanism.....                    | S17-S18  |
| Crystal structure.....                                           | S18-S27  |
| Spectral data.....                                               | S27-S65  |
| References.....                                                  | S66      |
| <sup>1</sup> H and <sup>13</sup> C NMR spectra.....              | S67-S147 |

**General Information:** Air-sensitive reagents were handled under a dry nitrogen atmosphere. Unless otherwise stated, all commercial reagents were used without additional purification. Solvents were dried using standard methods and distilled before use. TLC was performed on silica gel plates (Merck silica gel 60, f<sub>254</sub>), and the spots were visualized with UV light (254 and 365 nm) or by charring the plate dipped in KMnO<sub>4</sub> or vanillin charring solution. <sup>1</sup>H NMR spectra were recorded at 400 MHz (JEOL-JNM-ECZ400S/L1), <sup>13</sup>C NMR spectra were recorded at 100 MHz (JEOL-JNM-ECZ400S/L1) and <sup>19</sup>F NMR spectra were recorded at 376 MHz (JEOL-JNM-ECZ400S/L1) frequency in CDCl<sub>3</sub> solvent using TMS as the internal standard. Chemical shifts were measured in parts per million (ppm) referenced to 0.0 ppm for tetramethylsilane. The following abbreviations were used to explain multiplicities: s = singlet, d = doublet, t = triplet, q = quartet, m = multiplet, br. = broad, dt = doublet of triplet, td = triplet of doublet, dd = doublet of doublet. Coupling constants, *J* were reported in Hertz unit (Hz). HRMS (*m/z*) were measured using ESI technique (Q-Tof Micro mass spectrometer). Crystals were grown in dichloromethane and crystal data was recorded in (Bruker Kappa Apex-2, CCD Area Detector) instrument.

### Preparation of starting materials:

### Preparation of some 1-naphthylamines:

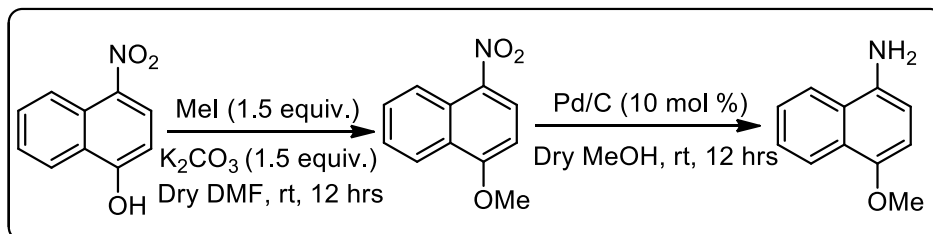

To a solution of 4-nitro-1-naphthol (106.0 mg, 0.4 mmol) in dry DMF (5.0 mL) were added K<sub>2</sub>CO<sub>3</sub> (83.0 mg, 0.6 mmol) and MeI (58  $\mu$ L, 0.6 mmol). The resulting reaction mixture was stirred at r.t. for 12 hrs. After completion of the reaction, the mixture was diluted with ethyl acetate and washed with chilled water, brine solution and dried over Na<sub>2</sub>SO<sub>4</sub>. The solvent was evaporated under reduced pressure and finally the crude product was purified by column chromatography to afford the desired product.

To a solution of nitro compound (50 mg) in 5.0 mL MeOH was added 10% Pd/C (15 mg) and stirred for 12 hrs under H<sub>2</sub> atmosphere. Then the mixture was diluted with EtOAc (5 mL), filtered through celite, the filtrate was concentrated under reduced pressure to afford the crude compound which was purified by column chromatography to give the corresponding as purple colored viscous liquid which was used for amidation following **procedure1**.

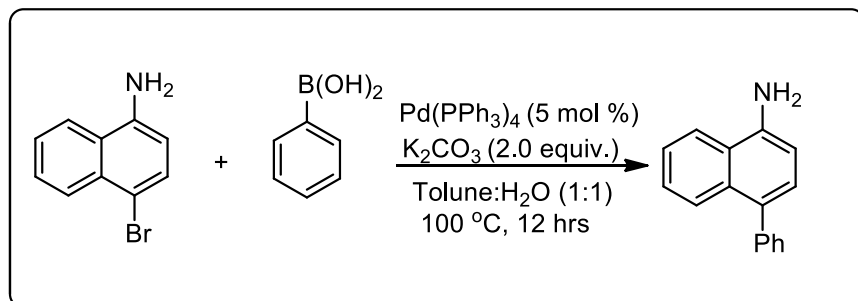

Phenylboronic acid or 3-Furanylboronic acid (1.5 mmol, 1.5 equiv.), 4-bromo-1-naphthylamine (1.0 equiv.), K<sub>2</sub>CO<sub>3</sub> (1.0 equiv.) and Pd(PPh<sub>3</sub>)<sub>4</sub> (5 mol %) were added to an oven-dried sealed tube (15 mL) and toluene (2 mL) and H<sub>2</sub>O (2 mL) were added into the tube which was then purged with nitrogen three times. The resulted solution was stirred at 100 °C for 8 hrs. The reaction mixture was cooled to r.t. and then extracted with ethyl acetate (3  $\times$  15 mL). The combined organic layer was washed with brine, dried over anhydrous Na<sub>2</sub>SO<sub>4</sub> and concentrated under reduced pressure. This crude product was passed through short column.

These substituted 1-naphthylamine compounds were then used for amidation following **procedure1**.

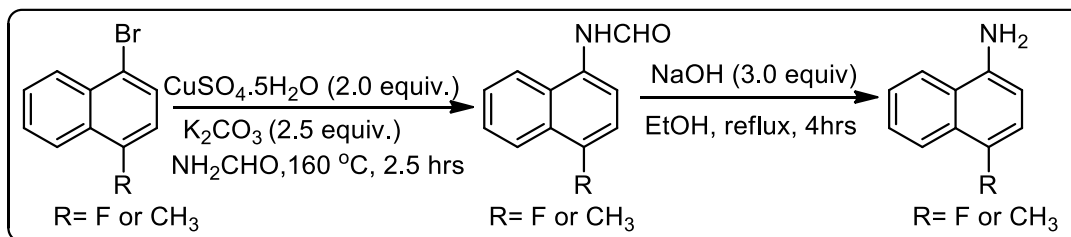

In an oven dried RB substituted 1-bromonaphthalene (2.5 mmol),  $\text{K}_2\text{CO}_3$  (865 mg, 6.25 mmol), and copper(II) sulfate pentahydrate (750 mg, 5.0 mmol) was taken and to it formamide (10 mL) was added. The RB was fitted with reflux condenser and heated at  $160\text{ }^\circ\text{C}$  for 4 hrs. (**caution:** don't use pressure tube for this reaction). After cooling to room temperature the reaction mixture was mixed with ice cold water (50 mL) and extracted with ethyl acetate ( $3 \times 20\text{ mL}$ ). Combined organic layers were dried over  $\text{Na}_2\text{SO}_4$  and evaporated. The crude product was used for the next step without further purification.

Aqueous (2 mL) sodium hydroxide (5.0 equiv.) was added to the ethanol (10 mL) solution of *N*-(naphthalen-1-yl)formamide. Resulting solution was heated to reflux for 6 hrs. Ethanol was evaporated and extracted with ethyl acetate ( $3 \times 10\text{ mL}$ ). The combined organic layer was dried over  $\text{Na}_2\text{SO}_4$  and solvent was evaporated under reduced pressure. The crude mixture was purified by column chromatography to obtain naphthylamines. These substituted 1-naphthylamine compounds were then used for amidation following **procedure 1**.

### General procedure for the preparation of picolinamides:

#### Procedure 1 for the preparation of picolinamides:

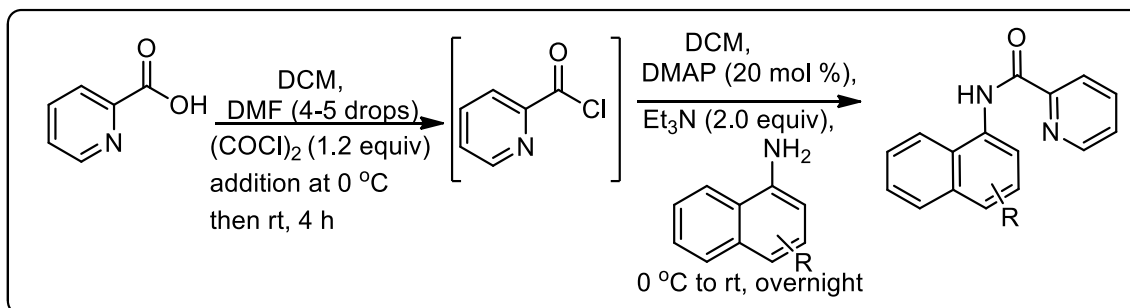

To an oven dried RB was charged with 2-picolinic acid or the corresponding acid (2.5 mmol) in dry  $\text{DCM}$  (5 mL) was added 4-5 drops of  $\text{DMF}$  and the solution was stirred at  $0\text{ }^\circ\text{C}$  for 5 minutes. Then oxalyl chloride (0.26 mL, 3 mmol) was added dropwise into the cooled solution of the acid which immediately formed rust-red color in case of 2-picolinic acid (other colors for other acids) with the gas bubbling and then stirred at  $0\text{ }^\circ\text{C}$  for 10 minutes. The reaction mixture was stirred at

room temperature for 4 hours. After completion, the excess oxalyl chloride was removed under *vacuum* to obtain crude acid chloride. Then, the crude pyridine-2-acid chloride was dissolved in 5 mL dry DCM, and cooled to 0 °C and DMAP (61 mg, 0.5 mmol), Et<sub>3</sub>N (0.7 mL, 5 mmol) and the naphthylamine (2.5 mmol) were successively added. Then the reaction mixture was stirred under room temperature for overnight. After completion as indicated by TLC, the mixture was diluted with 60 mL DCM and washed with 2N HCl (20 mL), brine solution (20 mL) and dried over Na<sub>2</sub>SO<sub>4</sub>. The solvent was evaporated under reduced pressure and finally the crude product was purified by column chromatography to afford the 2-picolinamide (50-85% yield). This method was used for the synthesis of most of the substrates.

### **Procedure 2 for the preparation of picolinamides:**

A RB containing pyridine-2-carboxylic acid (203 mg, 1.65 mmol), HATU (627 mg, 1.65 mmol) in dry DMF was cooled to 0 °C. Then DIPEA (0.43 ml, 2.5 mmol) and 5-amino isoquinoline (216 mg, 1.5 mmol) were successively added. The reaction mixture was stirred at r.t for overnight. Then the mixture was diluted with ethyl acetate and washed with chilled water, brine solution and dried over Na<sub>2</sub>SO<sub>4</sub>. The solvent was evaporated under reduced pressure and finally the crude product was purified by column chromatography to afford **1aa**.

### **Procedure 3 for the preparation of picolinamides:**

An oven dried RB charged with 5-methyl pyrazine-2- carboxylic acid (319 mg, 2.31 mmol), 1-naphthylamine (300 mg, 2.1 mmol), EDCI (443 mg, 2.31 mmol), HOBT (312 mg, 2.31 mmol) ) in dry DCM was cooled to 0 °C and then DIPEA (1.1 ml, 6.3 mmol) was added. The reaction mixture was stirred at r.t for 12 hrs. Then the mixture was diluted with DCM and washed with water, brine solution and dried over Na<sub>2</sub>SO<sub>4</sub>. The solvent was evaporated under reduced pressure and finally the crude product was purified by column chromatography to afford **1ad**. This method is also used for the synthesis of **1s**.

### **Procedure for the synthesis of 1u:**

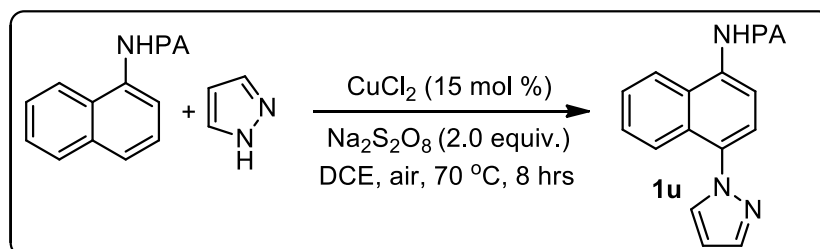

In an oven dried sealed tube charged with **1a** (496 mg, 2.0 mmol), pyrazole (544 mg, 4.0 equiv.), CuCl<sub>2</sub> (41 mg, 0.3 mmol), Na<sub>2</sub>S<sub>2</sub>O<sub>8</sub> (952 mg, 4.0 mmol) was added dry DCE (5ml) and heated at 70 °C for 8 hrs. Then the reaction mixture was cooled to r.t and diluted with DCM and washed with water, brine solution

and dried over  $\text{Na}_2\text{SO}_4$ . The solvent was evaporated under reduced pressure and finally the crude product was purified by column chromatography to afford **1u**. This method is also used for the synthesis of amide version of **4r**.

### Procedure for the synthesis of 1y:

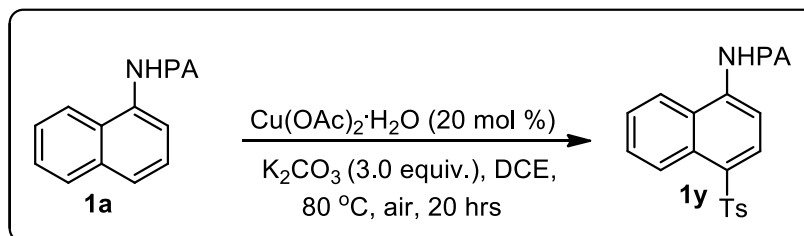

**1a** (248 mg, 1 mmol, 1.0 equiv.),  $\text{K}_2\text{CO}_3$  (276.5 mg, 2.0 mmol),  $\text{Cu}(\text{OAc})_2 \cdot \text{H}_2\text{O}$  (40.0 mg, 0.2 mmol),  $\text{TsCl}$  (570 mg, 3.0 mmol) and DCE (5 mL) were successively added into a sealed tube. The mixture was stirred at  $80^\circ\text{C}$  under air for 20 h. After cooling to ambient temperature, the resulting mixture was filtered through celite pad and washed with DCM. The filtrate was concentrated under vacuum and purified column chromatography using solvent mixtures of petroleum ether and ethyl acetate to give the product **1y**.

### Procedure for the synthesis of 1x:

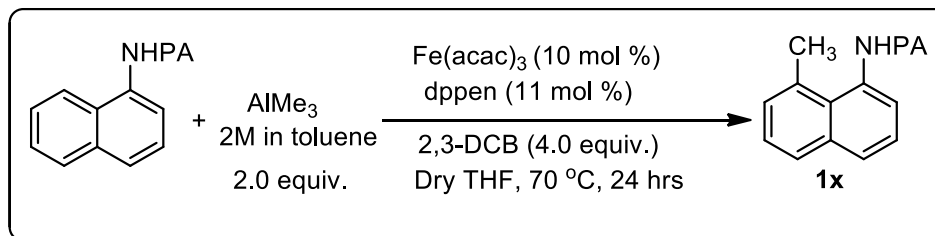

Under a nitrogen atmosphere, in an oven-dried two-necked RB a solution of  $\text{Fe}(\text{acac})_3$  (71 mg, 0.2 mmol) and (*Z*)-1,2-bis (diphenylphosphino)ethene (*dppen*) (88 mg, 0.22 mmol) in THF (1.0 ml) was injected into an anhydrous tetrahydrofuran (THF, 7 mL) solution of **1a** (496 mg, 2.0 mmol). Trimethylaluminum (2 ml, 4.0 mmol, 2.0 M in toluene) was slowly added. After stirring for 10 min to finish generating methane at r.t., 2,3-dichlorobutane (2,3-DCB) (0.9 ml, 8.0 mmol) was added via a syringe, and the RB was joined to reflux condenser and heated at  $70^\circ\text{C}$  for 24 h. After cooling to r.t., the mixture was diluted with diethyl ether, and methanol (2.0 ml) was slowly added via a syringe at  $0^\circ\text{C}$  to quench the aluminium reagent. Then the mixture was further diluted with diethyl ether and washed with water, brine solution and dried over  $\text{Na}_2\text{SO}_4$ . The solvent was evaporated under reduced pressure and finally the crude product was purified by column chromatography to afford **1x**.

### General Procedure for the preparation of *O*-benzoylhydroxylamines:

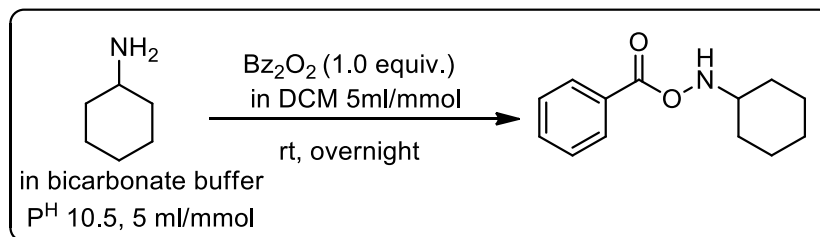

As reported in the literature<sup>1-3</sup> a solution of benzoyl peroxide (BPO, 1 equiv.) in  $\text{CH}_2\text{Cl}_2$  (5 mL/mmol BPO) was added to a mixture of the amine (1 equiv.) and aqueous  $\text{Na}_2\text{CO}_3/\text{NaHCO}_3$  buffer (pH 10.5) solution (5 mL/mmol amine) at room temperature overnight. (Note: The desired product in most cases had  $R_f$  values close to that of BPO). The aqueous layer was extracted three times with  $\text{CH}_2\text{Cl}_2$ . The organic layers were combined, dried over anhydrous  $\text{Na}_2\text{SO}_4$ , and concentrated. The crude residue was subjected to column chromatography for purification of the products. Using this protocol, *O*-benzoylhydroxylamine of other aliphatic primary amines were prepared. Most of the compounds are known in literature though  $^1\text{H}$ NMR and  $^{13}\text{C}$ NMR spectral data of some compounds are given.

### Preparation of $\text{pH}$ 10.5 bicarbonate buffer solution:

100 mL 0.1M  $\text{NaHCO}_3$  solution = 840 mg  $\text{NaHCO}_3$  in 100 mL water (solution A), 100 mL 0.1M  $\text{Na}_2\text{CO}_3$  solution = 1.06 gm  $\text{Na}_2\text{CO}_3$  in 100 mL water (solution B). For preparation 50 ml of  $\text{pH}$  10.5 = 5 mL solution A + 45 mL solution B.

**2a<sub>4</sub>, 2a<sub>5</sub>, 2a<sub>6</sub>, 2a<sub>7</sub>** were synthesized using corresponding substituted benzoyl peroxides.

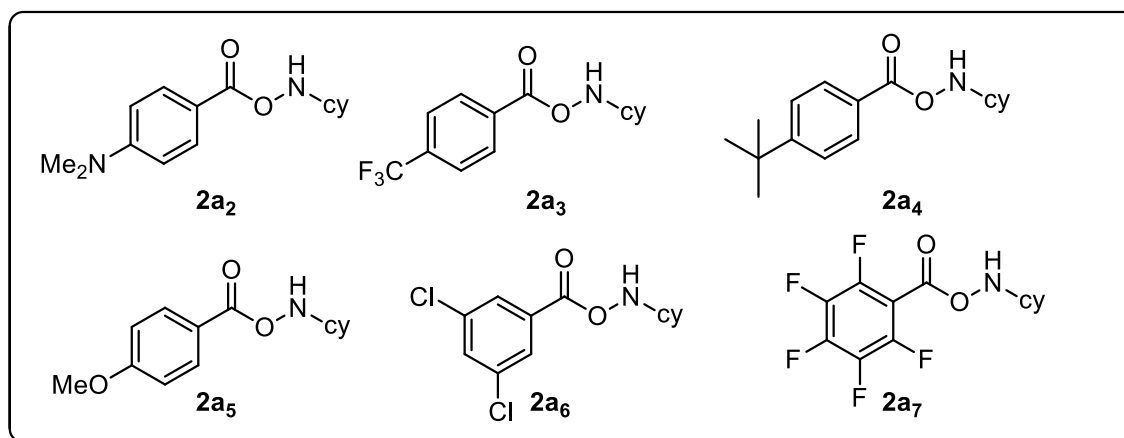

### Synthesis of aryl acylperoxide

In a round-bottomed flask, the solution of acid chloride (5 mmol) in diethyl ether (2.5 mL) was cooled to 0 °C in an ice-bath. Then, hydrogen peroxide (0.294 g, 30 wt.% in  $\text{H}_2\text{O}$ , 2.86 mmol) was added dropwise over 10 minutes to the cold solution. This was followed by the dropwise addition of an aqueous solution of  $\text{NaOH}$  (0.252g, 6.32 mmol, 2 mL) over 20 minutes. The resulting white

precipitate was collected by filtration. After washing with water (3×5 mL) and diethyl ether (3×5 mL), the solid was air dried and used for the next step without any further purification. In some case if the compound was found to dissolve in ether, after evaporating ether the compound was extracted with DCM and dried over anhydrous Na<sub>2</sub>SO<sub>4</sub> and after rotary evaporation of the solvent (<40 °C) the solid compound was obtained.

### **Synthesis of 2a<sub>2</sub> and 2a<sub>3</sub>**

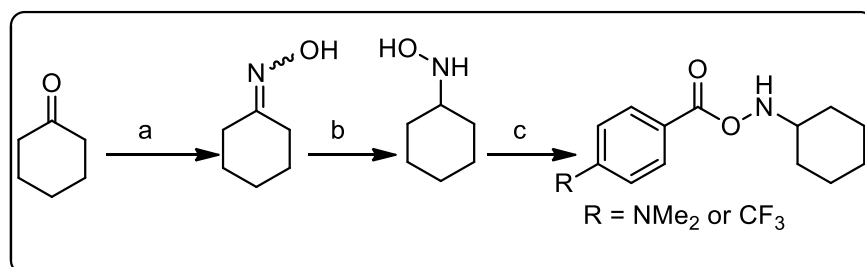

(a) A 100 ml round bottomed flask, equipped with a magnetic stirring bar, was charged with cyclohexanone (2.58 g, 25 mmol), hydroxylamine hydrochloride (2.57 g, 37.5 mmol), sodium acetate (5.13 g, 62.5 mmol), ethanol (10 mL) and water (30 mL). The reaction mixture was refluxed for 6 hrs and brought to room temperature. Thin layer chromatography in vanilline stain showed the complete conversion of cyclohexanone to cyclohexanone oxime. At this point, ethanol was evaporated using rotary evaporator. The residue was dissolved in 100 ml of EtOAc and washed sequentially with 20 mL of 1M HCl, 20 mL sat. NaHCO<sub>3</sub>, 20 mL sat. NaCl, and organic layer was dried over Na<sub>2</sub>SO<sub>4</sub>.

(b) To a stirring solution of cyclohexanone oxime (2.86 g, 25 mmol, 1.0 equiv) in MeOH (30 mL) containing an altered pH strip were added solid NaBH<sub>3</sub>CN (2.32 g, 37.5 mmol, 1.5 equiv) and aqueous HCl (2.0 M, about 35 mL) over 15 min in such a way that the pH of the solution stayed within 2–3 during the duration of the addition. The reaction mixture was allowed to stir for an additional 3.5 h, and then was quenched with the addition of aqueous 15% NaOH (until pH = 10). MeOH was removed in vacuo. The remaining aqueous solution was extracted with CH<sub>2</sub>Cl<sub>2</sub> (3 × 100 mL). The organic layers were combined, washed with brine (100 mL), dried over Na<sub>2</sub>SO<sub>4</sub>, and filtered. The filtrate was concentrated in vacuo. The crude residue was used for the next step.

(c) An oven-dried round bottom flask was charged with the corresponding benzoic acid (1.1 equiv) and CH<sub>2</sub>Cl<sub>2</sub> (0.3 M). The flask was placed in an ice-bath, and 1,1'-carbonyldiimidazole (1.1 equiv) was added. The mixture was stirred at this temperature for 30 min, at which time N-alkyl hydroxylamine (1.0 equiv) solution in dry CH<sub>2</sub>Cl<sub>2</sub> was added dropwise. The ice-bath was removed, and the reaction mixture was allowed to stir at room temperature for 1-2 h. The resulting mixture was passed through a pad of Celite, and rinsed with CH<sub>2</sub>Cl<sub>2</sub>. The filtrate was concentrated and purified by column chromatography to give the corresponding amine electrophile.

### **General procedure for the preparation of thioamides from corresponding picolinamides:**



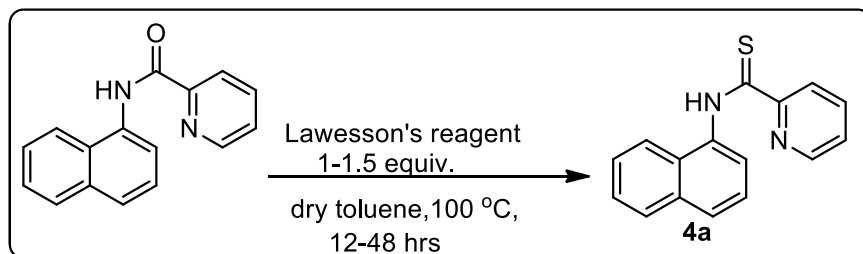

To a mixture of picolinamide (2.50 mmol) and Lawesson's reagent (0.52 g, 1.28 mmol) was added toluene (10 mL) and the solution refluxed for 12-48 hrs. The mixture was then filtered and solvent was removed under reduced pressure to afford a yellow solid material which was purified by column chromatography using solvent mixtures of petroleum ether and ethyl acetate to give the desired product (yellow solid). Using this method, thioamide of other amides were also prepared.

**General procedure for the preparation of picolinimidamide:**

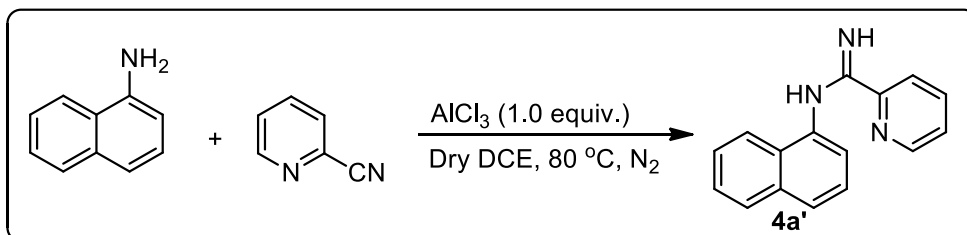

In an oven dried two-necked RB charged with 2-cyano pyridine (520 mg, 5.0 mmol) and 1-naphthylamine (715 mg, 5.0 mmol) under nitrogen atmosphere 10 ml dry DCE was added and cooled to 0 °C. Then AlCl<sub>3</sub> (665 mg, 5.0 mmol from glove box), was added portion wise to avoid overheating. The reaction mixture was stirred at this temperature for 10 minutes then at rt for 5 minutes. Then this mixture was heated to 80 °C for several hours under N<sub>2</sub> atmosphere. After consumption of the starting materials. The reaction mixture was diluted with 20 mL dichloromethane and washed with 15 mL of 6N NaOH. The resulting organic layer was separated and dried over Na<sub>2</sub>SO<sub>4</sub> and solvent was removed under reduced pressure. Then this crude product was washed with distilled hexane three times and dried under high vacuum to give the desired product which can be used without further purification.

**Procedure for the preparation of 6 and 7:**

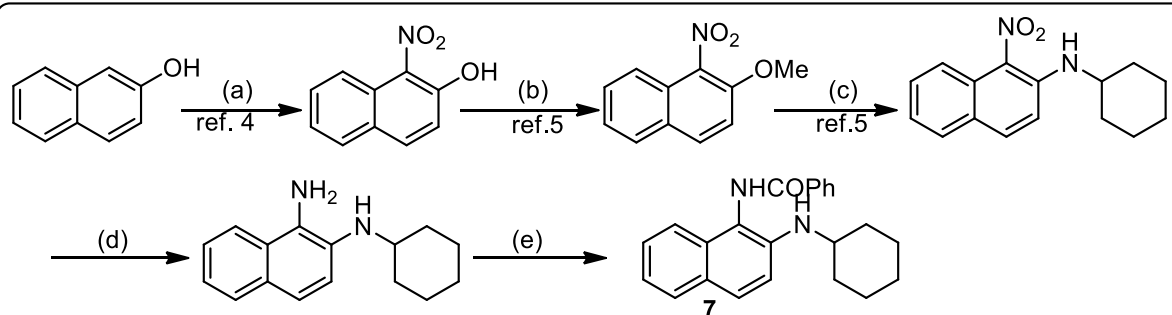

- (a)  $\text{ZrO}(\text{NO}_3)_2 \cdot x\text{H}_2\text{O}$  (1.0 equiv.), acetone, r.t., 3hrs, filter, solvent evaporation, column chromatography;  
 (b)  $\text{KOH}$  (3.0 equiv.),  $\text{MeI}$  (2.0 equiv.), acetone, reflux, 12 hrs, cooled to r.t., work-up, column chromatography;  
 (c)  $\text{K}_2\text{CO}_3$  (4.0 equiv.),  $\text{CyNH}_2$  (3.0 equiv.),  $\text{DMF}$ ,  $80^\circ\text{C}$ , 16 hrs, cooled to r.t., work-up, column chromatography;  
 (d)  $\text{Pd/C}$ ,  $\text{EtOAc}$ ,  $\text{H}_2$ , r.t., 3 hrs, filter on celite bed, solvent evaporation, used for next step immediately;  
 (e)  $\text{Et}_3\text{N}$  (2.0 equiv.),  $\text{BzCl}$  (1.0 equiv.),  $\text{DCM}$ , r.t., 30 min, work-up, solvent evaporation, column chromatography.

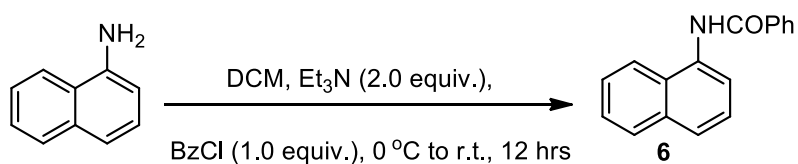

**Optimization table for imidazolone product<sup>a,b</sup>:**

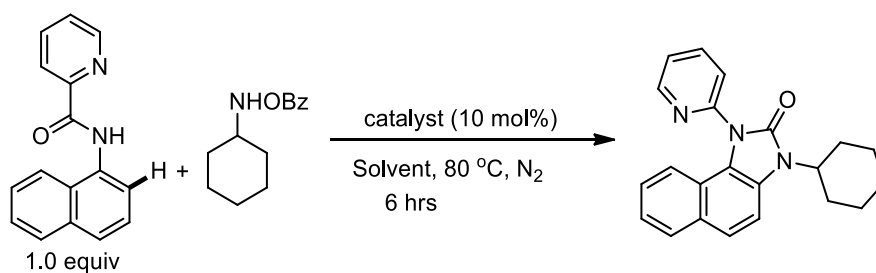

| Entry                 | Catalyst                                  | Amine source | additive                                     | solvent          | Yield (%) |
|-----------------------|-------------------------------------------|--------------|----------------------------------------------|------------------|-----------|
| 1                     | Cu(OAc) <sub>2</sub> .H <sub>2</sub> O    | 1.0          | -                                            | DMSO             | 44        |
| 2                     | Cu(OAc) <sub>2</sub> .H <sub>2</sub> O    | 1.5          | -                                            | DMSO             | 50        |
| 3                     | Cu(OAc) <sub>2</sub> .H <sub>2</sub> O    | 2.5          | -                                            | H <sub>2</sub> O | 0         |
| 4                     | Cu(OAc) <sub>2</sub> .H <sub>2</sub> O    | 2.5          | -                                            | Toluene          | 20        |
| 5                     | Cu(OAc) <sub>2</sub> .H <sub>2</sub> O    | 2.5          | -                                            | MeCN             | 39        |
| 6                     | Cu(OAc) <sub>2</sub> .H <sub>2</sub> O    | 2.5          | -                                            | 1,4-Dioxane      | 62        |
| 7                     | Cu(OAc) <sub>2</sub> .H <sub>2</sub> O    | 2.5          | -                                            | THF              | 52        |
| <b>8</b>              | <b>Cu(OAc)<sub>2</sub>.H<sub>2</sub>O</b> | <b>2.5</b>   | -                                            | <b>DMSO</b>      | <b>90</b> |
| <b>10<sup>c</sup></b> | <b>Cu(OAc)<sub>2</sub>.H<sub>2</sub>O</b> | <b>2.5</b>   | -                                            | <b>DMSO</b>      | <b>93</b> |
| 11 <sup>d</sup>       | Cu(OAc) <sub>2</sub> .H <sub>2</sub> O    | 2.5          | -                                            | DMSO             | 87        |
| 12 <sup>e</sup>       | Cu(OAc) <sub>2</sub> .H <sub>2</sub> O    | 2.5          | -                                            | DMSO             | 56        |
| 13 <sup>c</sup>       | Cu                                        | 2.5          | -                                            | DMSO             | 83        |
| 14 <sup>f</sup>       | Cu(OAc) <sub>2</sub> .H <sub>2</sub> O    | 2.5          | PIDA                                         | DMSO             | 5<        |
| 15 <sup>f</sup>       | Cu(OAc) <sub>2</sub> .H <sub>2</sub> O    | 2.5          | K <sub>2</sub> S <sub>2</sub> O <sub>8</sub> | DMSO             | 12        |
| 16 <sup>f</sup>       | Cu(OAc) <sub>2</sub> .H <sub>2</sub> O    | 2.5          | Bz <sub>2</sub> O <sub>2</sub>               | DMSO             | 32        |
| 17 <sup>g</sup>       | Cu(OAc) <sub>2</sub> .H <sub>2</sub> O    | 1.2          | Bz <sub>2</sub> O <sub>2</sub>               | DMSO             | 58        |
| 18 <sup>h</sup>       | Cu(OAc) <sub>2</sub> .H <sub>2</sub> O    | 2.5          | -                                            | DMSO             | 0         |
| 19                    | Pd(OAc) <sub>2</sub>                      | 2.5          | -                                            | DMSO             | 5<        |
| 20                    | Co(OAc) <sub>2</sub>                      | 2.5          | -                                            | DMSO             | 20<       |
| 21                    | Ni(OAc) <sub>2</sub>                      | 2.5          | -                                            | DMSO             | n.r.      |
| 22                    | Mn(OAc) <sub>2</sub>                      | 2.5          | -                                            | DMSO             | n.r.      |
| 23                    | FeBr <sub>2</sub>                         | 2.5          | -                                            | DMSO             | n.r.      |
| 24                    | FeCl <sub>2</sub>                         | 2.5          | -                                            | DMSO             | n.r.      |

<sup>a</sup>All reactions were carried out in 0.2 mmol scale. <sup>b</sup>Yields refer to here are overall isolated yields. <sup>c</sup>5.0 mol% catalyst was used. <sup>d</sup>1.0 mol % catalyst was used. <sup>e</sup>Reaction was performed at room temperature. <sup>f</sup>Free amine was used as amine source and oxidant 2.5 equiv. <sup>g</sup>1.0 equiv Bz<sub>2</sub>O<sub>2</sub> was used. <sup>h</sup>25% *ortho* aminated product was obtained without any copper catalyst.

**Optimization table for imidazole product<sup>a,b</sup>:**

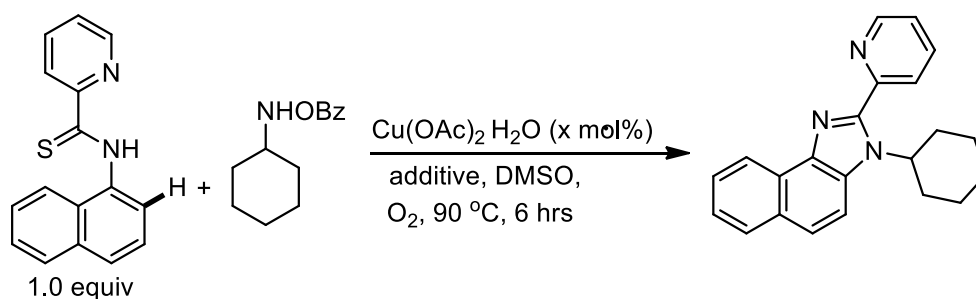

| Entry          | Amine source (equiv.) | Cu(OAc) <sub>2</sub> .H <sub>2</sub> O (mol%) | Additive | Yield (%) |
|----------------|-----------------------|-----------------------------------------------|----------|-----------|
| 1 <sup>c</sup> | 2.5                   | 10                                            | -        | 38        |
| 2 <sup>d</sup> | 2.5                   | 10                                            | -        | 40        |
| 3              | 2.5                   | 10                                            | -        | 46        |

|                       |            |           |                                               |           |
|-----------------------|------------|-----------|-----------------------------------------------|-----------|
| 4                     | 2.5        | 20        | -                                             | 48        |
| 5                     | 3.0        | 10        | -                                             | 50        |
| 6                     | 3.0        | 20        | -                                             | 53        |
| 7 <sup>e</sup>        | 3.0        | 20        | -                                             | 34        |
| 8 <sup>f</sup>        | 3.0        | 20        | -                                             | 40        |
| 9 <sup>g</sup>        | 3.0        | 20        | -                                             | 40        |
| 10                    | 3.0        | 20        | 1.2 equiv. K <sub>2</sub> CO <sub>3</sub>     | 58        |
| 11 <sup>h</sup>       | 3.0        | 20        | 1.2 equiv. K <sub>2</sub> CO <sub>3</sub>     | 64        |
| <b>12<sup>i</sup></b> | <b>3.0</b> | <b>20</b> | <b>1.2 equiv. K<sub>2</sub>CO<sub>3</sub></b> | <b>88</b> |
| 13 <sup>i</sup>       | 3.0        | 20        | -                                             | 64        |
| 14 <sup>i</sup>       | 3.0        | 10        | 1.2 equiv. K <sub>2</sub> CO <sub>3</sub>     | 70        |
| 15 <sup>i,j</sup>     | 3.0        | 10        | 1.2 equiv. K <sub>2</sub> CO <sub>3</sub>     | 0         |

<sup>a</sup>All reactions were carried out in 0.2 mmol scale. <sup>b</sup>Yields refer to here are overall isolated yields.

<sup>c</sup>Reaction was continued for 3 hrs. <sup>d</sup>Reaction was carried out at 100 °C. <sup>e</sup>Reaction was carried out in dry toluene. <sup>f</sup>Reaction was carried out in dry 1,4-dioxane. <sup>g</sup>Reaction was carried out in dry THF. <sup>h</sup>Reaction was carried out in air. <sup>i</sup>Reaction was carried under O<sub>2</sub> atm. <sup>j</sup>Reaction was performed with substrate **1a** instead of **4a**.

### Optimization table for imidazolone product in 2-substituted aniline system<sup>a,b</sup>:

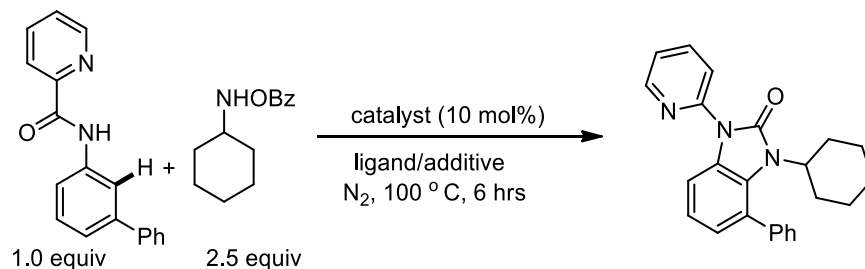

| Entry          | Catalyst                                  | Additive (1.5 equiv.)          | Ligand (20 mol %) | Solvent     | Yield (%) |
|----------------|-------------------------------------------|--------------------------------|-------------------|-------------|-----------|
| 1 <sup>c</sup> | Cu(OAc) <sub>2</sub> .H <sub>2</sub> O    | -                              | -                 | DMSO        | 20        |
| 2 <sup>c</sup> | Pd(OAc) <sub>2</sub>                      | -                              | -                 | DMSO        | nr        |
| 3 <sup>c</sup> | Co(OAc) <sub>2</sub> .4H <sub>2</sub> O   | -                              | -                 | DMSO        | 5 <       |
| <b>4</b>       | <b>Cu(OAc)<sub>2</sub>.H<sub>2</sub>O</b> | -                              | -                 | <b>DMSO</b> | <b>40</b> |
| 5 <sup>d</sup> | Cu(OAc) <sub>2</sub> .H <sub>2</sub> O    | -                              | -                 | DMSO        | 27        |
| 6 <sup>e</sup> | Cu(OAc) <sub>2</sub> .H <sub>2</sub> O    | -                              | -                 | DMSO        | 27        |
| 7              | Cu(OAc) <sub>2</sub> .H <sub>2</sub> O    | -                              | -                 | Toluene     | 20        |
| 8              | Cu(OAc) <sub>2</sub> .H <sub>2</sub> O    | -                              | -                 | 1,4-dioxane | 32        |
| 9              | Cu(OAc) <sub>2</sub> .H <sub>2</sub> O    | -                              | -                 | MeCN        | 28        |
| 10             | Cu(OAc) <sub>2</sub> .H <sub>2</sub> O    | -                              | -                 | DCE         | 28        |
| 11             | Cu(OAc) <sub>2</sub> .H <sub>2</sub> O    | K <sub>2</sub> CO <sub>3</sub> | -                 | DMSO        | 15        |
| 12             | Cu(OAc) <sub>2</sub> .H <sub>2</sub> O    | NaHCO <sub>3</sub>             | -                 | DMSO        | 37        |

|    |                                        |                                 |                  |      |    |
|----|----------------------------------------|---------------------------------|------------------|------|----|
| 13 | Cu(OAc) <sub>2</sub> .H <sub>2</sub> O | Li <sub>2</sub> CO <sub>3</sub> | -                | DMSO | 35 |
| 14 | Cu(OAc) <sub>2</sub> .H <sub>2</sub> O | K <sub>2</sub> CO <sub>3</sub>  | -                | DMSO | 32 |
| 15 | Cu(OAc) <sub>2</sub> .H <sub>2</sub> O | CS <sub>2</sub> CO <sub>3</sub> | -                | DMSO | nr |
| 16 | Cu(OAc) <sub>2</sub> .H <sub>2</sub> O | KHCO <sub>3</sub>               | -                | DMSO | 30 |
| 17 | Cu(OAc) <sub>2</sub> .H <sub>2</sub> O | LiO <sup>t</sup> Bu             | -                | DMSO | nr |
| 18 | Cu(OAc) <sub>2</sub> .H <sub>2</sub> O | NaHCO <sub>3</sub>              | dppb             | DMSO | 39 |
| 19 | Cu(OAc) <sub>2</sub> .H <sub>2</sub> O | NaHCO <sub>3</sub>              | dppm             | DMSO | 27 |
| 20 | Cu(OAc) <sub>2</sub> .H <sub>2</sub> O | NaHCO <sub>3</sub>              | dppe             | DMSO | 35 |
| 21 | Cu(OAc) <sub>2</sub> .H <sub>2</sub> O | NaHCO <sub>3</sub>              | dppp             | DMSO | 27 |
| 22 | Cu(OAc) <sub>2</sub> .H <sub>2</sub> O | NaHCO <sub>3</sub>              | dppf             | DMSO | 20 |
| 23 | Cu(OAc) <sub>2</sub> .H <sub>2</sub> O | NaHCO <sub>3</sub>              | dppen            | DMSO | 27 |
| 24 | Cu(OAc) <sub>2</sub> .H <sub>2</sub> O | -                               | 1,10-phen        | DMSO | 18 |
| 25 | Cu(OAc) <sub>2</sub> .H <sub>2</sub> O | -                               | PPh <sub>3</sub> | DMSO | 35 |
| 26 | Cu(OAc) <sub>2</sub> .H <sub>2</sub> O | -                               | x-phos           | DMSO | 35 |
| 27 | Cu(OAc) <sub>2</sub> .H <sub>2</sub> O | -                               | dtbbpy           | DMSO | 35 |
| 28 | Cu(OAc) <sub>2</sub> .H <sub>2</sub> O | -                               | terpyridine      | DMSO | 35 |
| 29 | Cu(OTf) <sub>2</sub>                   | -                               | -                | DMSO | 35 |
| 30 | Cu <sub>2</sub> O                      | -                               | -                | DMSO | 33 |
| 31 | CuSO <sub>4</sub> .5H <sub>2</sub> O   | -                               | -                | DMSO | 35 |
| 32 | CuCl                                   | -                               | -                | DMSO | 28 |
| 33 | Cu(OAc) <sub>2</sub>                   | -                               | -                | DMSO | 35 |
| 34 | Cu(OAc) <sub>2</sub> .H <sub>2</sub> O | Zn dust                         | -                | DMSO | 30 |
| 35 | Cu(OAc) <sub>2</sub> .H <sub>2</sub> O | Mn(OAc) <sub>2</sub>            | -                | DMSO | 28 |
| 36 | Cu(OAc) <sub>2</sub> .H <sub>2</sub> O | Mn(OAc) <sub>3</sub>            | -                | DMSO | 28 |

<sup>a</sup>All reactions were carried out in 0.2 mmol scale. <sup>b</sup>Yields refer to here are overall isolated yields. <sup>c</sup>Temperature was 80 °C. <sup>d</sup>20 mol % catalyst was used. <sup>e</sup>50 mol % catalyst was used.

**Optimization table for amination product in aniline system<sup>a,b</sup>:**

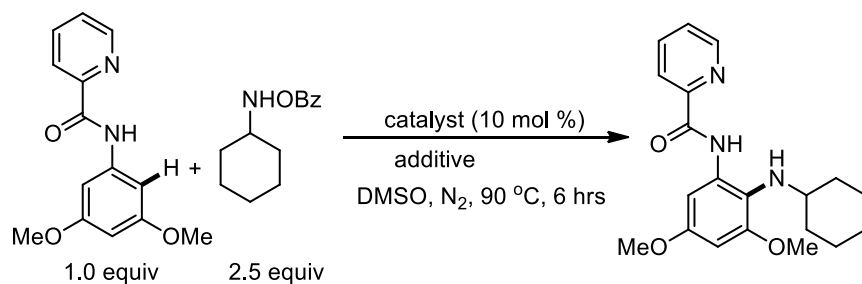

| Entry          | catalyst                               | additive                       | Yield (%) |
|----------------|----------------------------------------|--------------------------------|-----------|
| 1              | Cu(OAc) <sub>2</sub> .H <sub>2</sub> O | -                              | 35        |
| 2 <sup>c</sup> | Cu(OAc) <sub>2</sub> .H <sub>2</sub> O | -                              | 25        |
| 3              | Cu(OTf) <sub>2</sub>                   | -                              | 10<       |
| 4              | Pd(OAc) <sub>2</sub>                   | -                              | nr        |
| 5              | Cu(OAc) <sub>2</sub> .H <sub>2</sub> O | 1,10-phen                      | 15        |
| 6              | Cu(OAc) <sub>2</sub> .H <sub>2</sub> O | K <sub>2</sub> CO <sub>3</sub> | 58        |
| 7 <sup>d</sup> | Cu(OAc) <sub>2</sub> .H <sub>2</sub> O | K <sub>2</sub> CO <sub>3</sub> | 50        |

|                |                                           |                                 |           |
|----------------|-------------------------------------------|---------------------------------|-----------|
| 8 <sup>e</sup> | Cu(OAc) <sub>2</sub> ·H <sub>2</sub> O    | K <sub>2</sub> CO <sub>3</sub>  | 54        |
| 9              | Cu(OAc) <sub>2</sub> ·H <sub>2</sub> O    | Na <sub>2</sub> CO <sub>3</sub> | 45        |
| 10             | Cu(OAc) <sub>2</sub> ·H <sub>2</sub> O    | Cs <sub>2</sub> CO <sub>3</sub> | 43        |
| 11             | Cu(OAc) <sub>2</sub> ·H <sub>2</sub> O    | KOAc                            | 30        |
| 12             | <b>Cu(OAc)<sub>2</sub>·H<sub>2</sub>O</b> | <b>LiO<sup>t</sup>Bu</b>        | <b>72</b> |

<sup>a</sup>All reactions were carried out in 0.2 mmol scale. <sup>b</sup>Yields refer to here are overall isolated yields.

<sup>c</sup>Temperature 100 °C and time 12 hrs. <sup>d</sup>Air. <sup>e</sup>O<sub>2</sub> atm.

### Representative Procedure 1 for imidazolone:

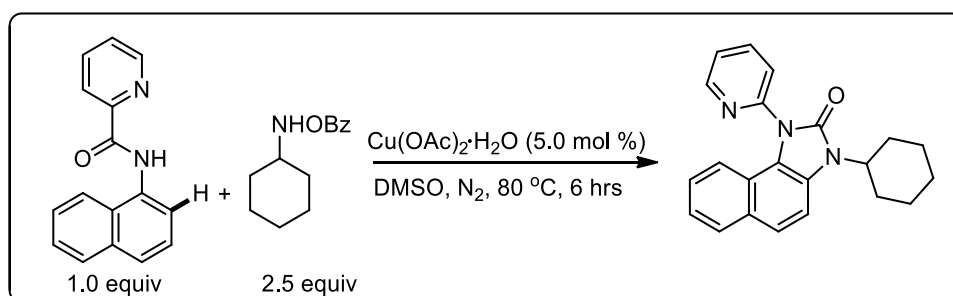

In an oven dried 15 mL sealed tube containing a stir bar was added corresponding picolinamide (0.2 mmol, 1.0 equiv), *O*-benzoylhydroxylamine (0.5 mmol, 2.5 equiv.) and Cu(OAc)<sub>2</sub>·H<sub>2</sub>O (0.01 mmol). Dry DMSO (2mL) was then added and N<sub>2</sub> gas was purged for 2 minutes. The mixture was stirred at 80 °C for 6 hrs. After allotted time the reaction mixture was cooled to room temperature. The mixture was diluted with EtOAc (15 mL) and washed with saturated aq. NaHCO<sub>3</sub> solution (25mL), followed by brine solution (25 mL) and dried over Na<sub>2</sub>SO<sub>4</sub>, and evaporated in *vacuo*. The crude mixture was loaded on a silica gel column chromatography and purified using (Hexane/EtOAc) to give the desired imidazolone product.

### Representative Procedure for imidazole:

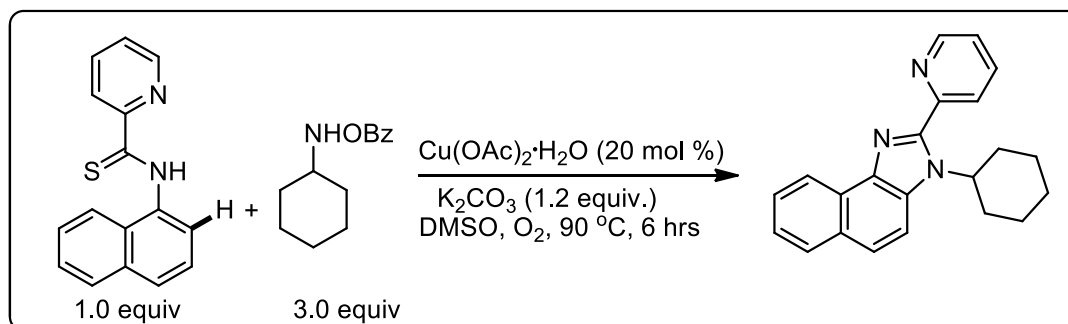

In an oven dried 15 mL sealed tube containing a stir bar was added corresponding thiopicolinamide (0.2 mmol, 1.0 equiv), *O*-benzoylhydroxylamine (0.5 mmol, 3.0 equiv.), Cu(OAc)<sub>2</sub>·H<sub>2</sub>O (0.04 mmol) and K<sub>2</sub>CO<sub>3</sub> (0.24 mmol). Dry DMSO (2mL) was then added and O<sub>2</sub> gas was purged for 2 minutes. [**Note:** amount of O<sub>2</sub> should be sufficient for better reaction and so large amount of empty space is required. For scale up reaction (2.0 mmol) 100 mL pressure tube was used]. The mixture was stirred at 90 °C for 6 hrs. After allotted time the reaction mixture was cooled to room temperature. The mixture was diluted with EtOAc (15 mL) and washed with saturated aq. NaHCO<sub>3</sub> solution (25mL), followed by brine solution (25 mL) and dried over Na<sub>2</sub>SO<sub>4</sub>, and evaporated in *vacuo*. The crude mixture was loaded on a silica gel column chromatography and purified using (Hexane/EtOAc) to give the desired imidazole product.

**Representative Procedure 2 for imidazolone in 2-substituted aniline system:**

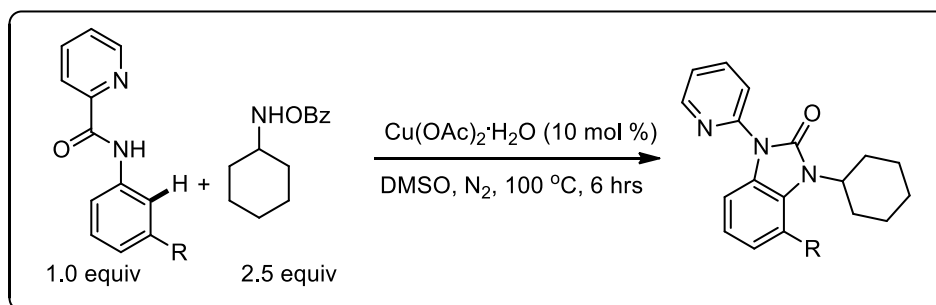

In an oven dried 15 mL sealed tube containing a stir bar was added corresponding picolinamide (0.2 mmol, 1.0 equiv), *O*-benzoylhydroxylamine (0.5 mmol, 2.5 equiv.) and Cu(OAc)<sub>2</sub>·H<sub>2</sub>O (0.02 mmol). Dry DMSO (2mL) was then added and N<sub>2</sub> gas was purged for 2 minutes. The mixture was stirred at 100 °C for 6 hrs. After allotted time the reaction mixture was cooled to room temperature. The mixture was diluted with EtOAc (15 mL) and washed with saturated aq. NaHCO<sub>3</sub> solution (25mL), followed by brine solution (25 mL) and dried over Na<sub>2</sub>SO<sub>4</sub>, and evaporated in *vacuo*. The crude mixture was loaded on a silica gel column chromatography and purified using (Hexane/EtOAc) to give the desired imidazolone product.

**Representative Procedure for amination in aniline system:**

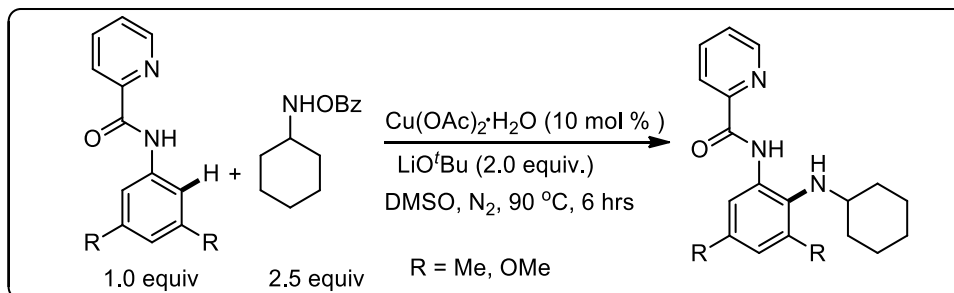

In an oven dried 15 mL sealed tube containing a stir bar was added corresponding picolinamide (0.2 mmol, 1.0 equiv), *O*-benzoylhydroxylamine (0.5 mmol, 2.5 equiv.),  $\text{LiO}^t\text{Bu}$  (0.4 mmol, 2.0 equiv.) and  $\text{Cu(OAc)}_2 \cdot \text{H}_2\text{O}$  (0.02 mmol). Dry DMSO (2mL) was then added and  $\text{N}_2$  gas was purged for 2 minutes. The mixture was stirred at 90 °C for 6 hrs. After allotted time the reaction mixture was cooled to room temperature. The mixture was diluted with EtOAc (15 mL) and washed with saturated aq.  $\text{NaHCO}_3$  solution (25mL), followed by brine solution (25 mL) and dried over  $\text{Na}_2\text{SO}_4$ , and evaporated in *vacuo*. The crude mixture was loaded on a silica gel column chromatography and purified using (Hexane/EtOAc) to give the desired amination product.

#### Procedure for synthesis of compound 1a':

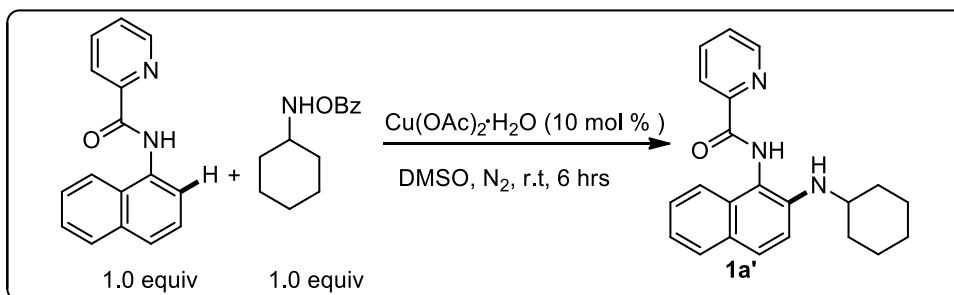

In an oven dried RB containing a stir bar was added picolinamide **1a** (2 mmol, 1.0 equiv), *O*-benzoylhydroxylamine (2 mmol, 1.0 equiv.) and  $\text{Cu(OAc)}_2 \cdot \text{H}_2\text{O}$  (0.2 mmol). Dry DMSO (15 mL) was then added and  $\text{N}_2$  gas was purged for 2 minutes. The mixture was stirred at room temperature for 6 hrs. The mixture was diluted with EtOAc (100 mL) and washed with saturated aq.  $\text{NaHCO}_3$  solution (50 mL), followed by brine solution (50 mL) and dried over  $\text{Na}_2\text{SO}_4$ , and evaporated in *vacuo*. The crude mixture was loaded on a silica gel column chromatography and purified using (Hexane/EtOAc) to give the amination product.

#### Deprotection of pyridyl group of Benzimidazolone product:



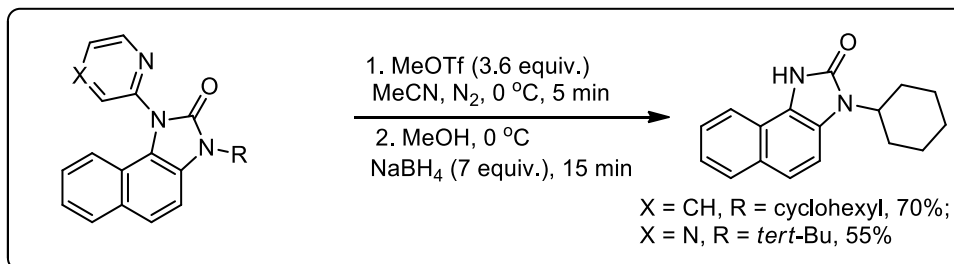

This deprotection was done according a condition for the deprotection of N-pyridyl group.<sup>6</sup> In an oven dried RB containing a stir bar was added the benzimidazolone and dry MeCN and it was cooled to 0 °C in an ice-bath under N<sub>2</sub> atmosphere. Ice-cooled MeOTf (3.6 equiv.) was added dropwise to this solution. After addition the mixture was stirred at r.t. for 10 minutes. Then to this mixture MeOH (4 mL) was added and further cooled to 0 °C in an ice-bath. NaBH<sub>4</sub> (7.0 equiv.) was added portion-wise and stirred at this temperature for 15 minutes. After that the solvent was evaporated and diluted with EtOAc, washed with water and dried over Na<sub>2</sub>SO<sub>4</sub>. This was concentrated under vacuum followed by column chromatography gave the desired product.

### **Time dependent <sup>1</sup>H NMR experiment for mechanistic determination of intermediate:**

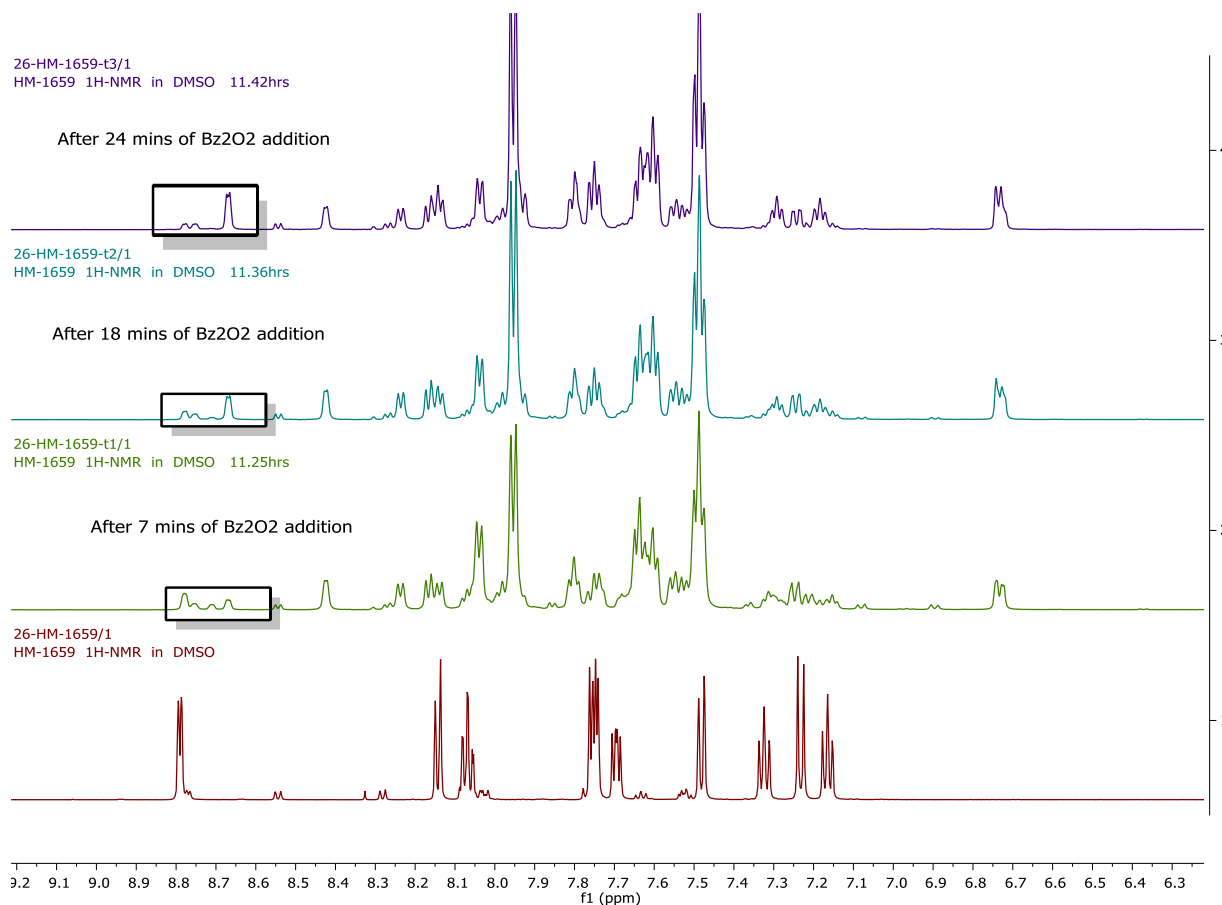

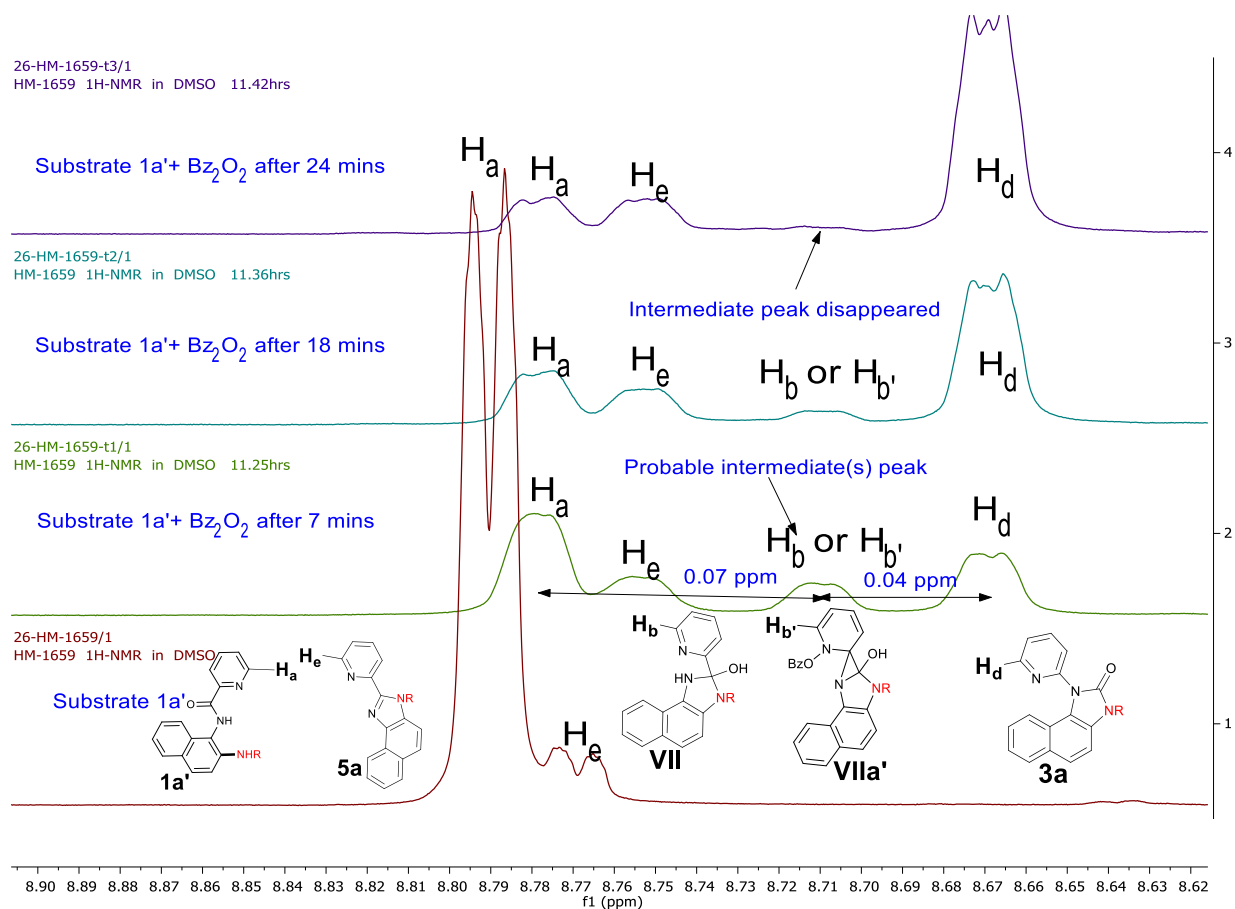

## Crystal structure:

The crystals were grown in dichloromethane solvent. The pure compound was dissolved in dichloromethane slow evaporation led to the crystal **4a**. The crystal data was collected in X-ray spectroscopy (Bruker Kappa Apex-2, CCD Area Detector), and the data was analyzed using OLEX2 software. The structure is given below. The corresponding cif file has been uploaded separately as supporting information.

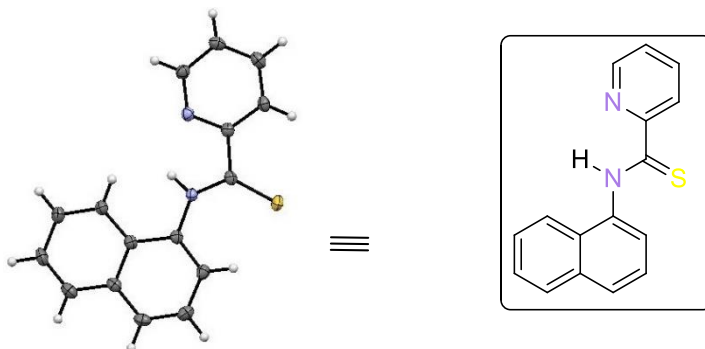

Thermal ellipsoid plot of **4a**. Ellipsoids are represented with 50% probability.

X-ray determined molecular structure of **4a**, CCDC: 2025280

|                                    |                                                               |
|------------------------------------|---------------------------------------------------------------|
| Identification code                | HM_643S_0m_a                                                  |
| Empirical formula                  | C <sub>16</sub> H <sub>12</sub> N <sub>2</sub> S              |
| Formula weight                     | 264.34                                                        |
| Temperature/K                      | 100.0                                                         |
| Crystal system                     | monoclinic                                                    |
| Space group                        | P2 <sub>1</sub> /c                                            |
| a/Å                                | 6.1282(2)                                                     |
| b/Å                                | 14.1422(4)                                                    |
| c/Å                                | 14.4603(4)                                                    |
| α/°                                | 90                                                            |
| β/°                                | 95.2550(10)                                                   |
| γ/°                                | 90                                                            |
| Volume/Å <sup>3</sup>              | 1247.95(6)                                                    |
| Z                                  | 4                                                             |
| ρ <sub>calc</sub> /cm <sup>3</sup> | 1.407                                                         |
| μ/mm <sup>-1</sup>                 | 2.167                                                         |
| F(000)                             | 552.0                                                         |
| Crystal size/mm <sup>3</sup>       | 0.2 × 0.2 × 0.2                                               |
| Radiation                          | CuKα (λ = 1.54178)                                            |
| 2θ range for data collection/°     | 8.764 to 133.626                                              |
| Index ranges                       | -7 ≤ h ≤ 7, -16 ≤ k ≤ 16, -17 ≤ l ≤ 17                        |
| Reflections collected              | 19122                                                         |
| Independent reflections            | 2213 [R <sub>int</sub> = 0.0469, R <sub>sigma</sub> = 0.0251] |
| Data/restraints/parameters         | 2213/0/172                                                    |
| Goodness-of-fit on F <sup>2</sup>  | 1.078                                                         |

Final R indexes [ $I \geq 2\sigma(I)$ ]  $R_1 = 0.0361$ ,  $wR_2 = 0.0921$

Final R indexes [all data]  $R_1 = 0.0373$ ,  $wR_2 = 0.0929$

Largest diff. peak/hole /  $e \text{ \AA}^{-3}$  0.26/-0.32

The crystals were grown in dichloromethane solvent. The pure compound was dissolved in dichloromethane slow evaporation led to the crystal **3aj**. The crystal data was collected in X-ray spectroscopy (Bruker Kappa Apex-2, CCD Area Detector), and the data was analyzed using OLEX2 software. The structure is given below. The corresponding cif file has been uploaded separately as supporting information.

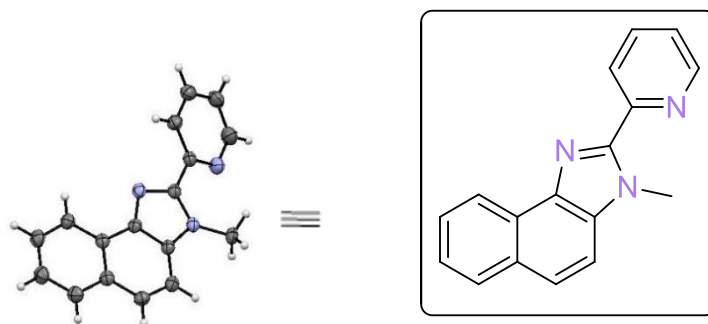

Thermal ellipsoid plot of **3aj**. Ellipsoids are represented with 50% probability.

X-ray determined molecular structure of **3aj**, CCDC: 2025266

|                     |                   |
|---------------------|-------------------|
| Identification code | HM_430A_0m_a      |
| Empirical formula   | $C_{18}H_{15}N_2$ |
| Formula weight      | 259.32            |
| Temperature/K       | 100.0             |
| Crystal system      | monoclinic        |
| Space group         | $P2_1/n$          |
| $a/\text{\AA}$      | 10.9333(3)        |

|                                                |                                                               |
|------------------------------------------------|---------------------------------------------------------------|
| b/Å                                            | 7.3400(2)                                                     |
| c/Å                                            | 16.2518(5)                                                    |
| $\alpha$ /°                                    | 90                                                            |
| $\beta$ /°                                     | 98.6550(10)                                                   |
| $\gamma$ /°                                    | 90                                                            |
| Volume/Å <sup>3</sup>                          | 1289.36(6)                                                    |
| Z                                              | 4                                                             |
| $\rho_{\text{calc}}$ /cm <sup>3</sup>          | 1.336                                                         |
| $\mu$ /mm <sup>-1</sup>                        | 0.612                                                         |
| F(000)                                         | 548.0                                                         |
| Crystal size/mm <sup>3</sup>                   | 0.2 × 0.2 × 0.2                                               |
| Radiation                                      | CuK $\alpha$ ( $\lambda$ = 1.54178)                           |
| 2 $\Theta$ range for data collection/°         | 13.262 to 132.918                                             |
| Index ranges                                   | -12 ≤ h ≤ 12, -8 ≤ k ≤ 8, -19 ≤ l ≤ 17                        |
| Reflections collected                          | 18364                                                         |
| Independent reflections                        | 2259 [R <sub>int</sub> = 0.0807, R <sub>sigma</sub> = 0.0459] |
| Data/restraints/parameters                     | 2259/0/183                                                    |
| Goodness-of-fit on F <sup>2</sup>              | 1.056                                                         |
| Final R indexes [I ≥ 2 $\sigma$ (I)]           | R <sub>1</sub> = 0.0733, wR <sub>2</sub> = 0.2003             |
| Final R indexes [all data]                     | R <sub>1</sub> = 0.0760, wR <sub>2</sub> = 0.2033             |
| Largest diff. peak/hole / e<br>Å <sup>-3</sup> | 0.55/-0.66                                                    |

The crystals were grown in dichloromethane solvent. The pure compound was dissolved in dichloromethane slow evaporation led to the crystal **5h**. The crystal data was collected in X-ray spectroscopy (Bruker Kappa Apex-2, CCD Area Detector), and the data was analyzed using OLEX2 software. The structure is given below. The corresponding cif file has been uploaded separately as supporting information.

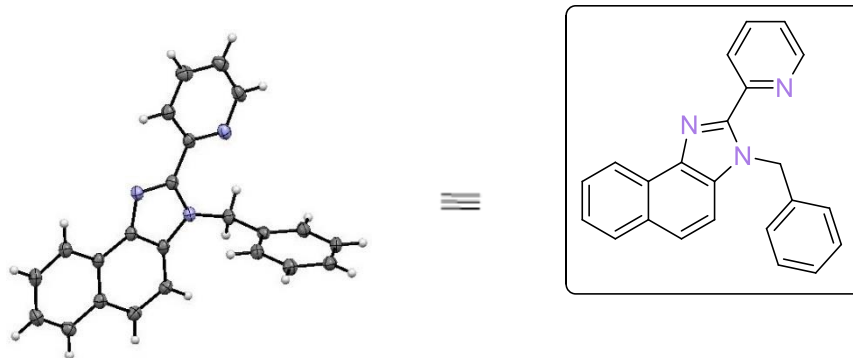

Thermal ellipsoid plot of **5h**. Ellipsoids are represented with 50% probability.

X-ray determined molecular structure of **5h**, CCDC: 2025275

|                                    |                                                |
|------------------------------------|------------------------------------------------|
| Identification code                | K_101_0m_a                                     |
| Empirical formula                  | C <sub>23</sub> H <sub>18</sub> N <sub>3</sub> |
| Formula weight                     | 336.40                                         |
| Temperature/K                      | 100.0                                          |
| Crystal system                     | monoclinic                                     |
| Space group                        | P2 <sub>1</sub> /n                             |
| a/Å                                | 11.8246(5)                                     |
| b/Å                                | 8.7668(4)                                      |
| c/Å                                | 16.2183(7)                                     |
| α/°                                | 90                                             |
| β/°                                | 90.457(2)                                      |
| γ/°                                | 90                                             |
| Volume/Å <sup>3</sup>              | 1681.20(13)                                    |
| Z                                  | 4                                              |
| ρ <sub>calc</sub> /cm <sup>3</sup> | 1.329                                          |
| μ/mm <sup>-1</sup>                 | 0.618                                          |
| F(000)                             | 708.0                                          |
| Crystal size/mm <sup>3</sup>       | 0.35 × 0.29 × 0.28                             |
| Radiation                          | CuKα (λ = 1.54178)                             |

|                                                  |                                                                    |
|--------------------------------------------------|--------------------------------------------------------------------|
| 2 $\Theta$ range for data collection/ $^{\circ}$ | 10.91 to 133.22                                                    |
| Index ranges                                     | $-14 \leq h \leq 13$ , $-10 \leq k \leq 10$ , $-18 \leq l \leq 19$ |
| Reflections collected                            | 16494                                                              |
| Independent reflections                          | 2930 [ $R_{\text{int}} = 0.0772$ , $R_{\text{sigma}} = 0.0536$ ]   |
| Data/restraints/parameters                       | 2930/0/235                                                         |
| Goodness-of-fit on $F^2$                         | 1.105                                                              |
| Final R indexes [ $I \geq 2\sigma$ (I)]          | $R_1 = 0.0624$ , $wR_2 = 0.1540$                                   |
| Final R indexes [all data]                       | $R_1 = 0.0667$ , $wR_2 = 0.1575$                                   |
| Largest diff. peak/hole / e $\text{\AA}^{-3}$    | 0.25/-0.66                                                         |

The crystals were grown in dichloromethane solvent. The pure compound was dissolved in dichloromethane slow evaporation led to the crystal **3ad**. The crystal data was collected in X-ray spectroscopy (Bruker Kappa Apex-2, CCD Area Detector), and the data was analyzed using OLEX2 software. The structure is given below. The corresponding cif file has been uploaded separately as supporting information.

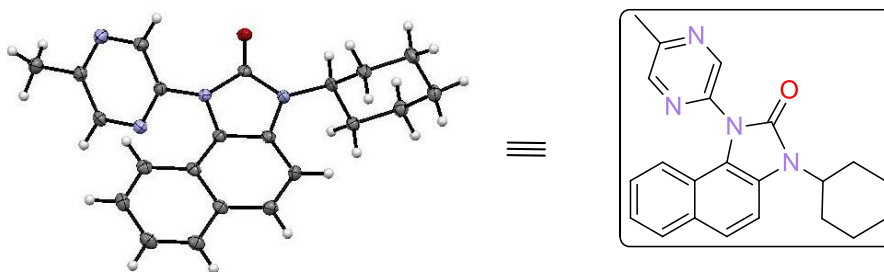

Thermal ellipsoid plot of **3ad**. Ellipsoids are represented with 50% probability.

X-ray determined molecular structure of **3ad**, CCDC: 2025269

|                                        |                                                                         |
|----------------------------------------|-------------------------------------------------------------------------|
| Identification code                    | HM_583_0m_a                                                             |
| Empirical formula                      | C <sub>2.44</sub> H <sub>2.44</sub> N <sub>0.44</sub> O <sub>0.11</sub> |
| Formula weight                         | 39.83                                                                   |
| Temperature/K                          | 100.0                                                                   |
| Crystal system                         | triclinic                                                               |
| Space group                            | P-1                                                                     |
| a/Å                                    | 7.9957(2)                                                               |
| b/Å                                    | 10.4307(2)                                                              |
| c/Å                                    | 12.5078(3)                                                              |
| $\alpha$ /°                            | 67.7270(10)                                                             |
| $\beta$ /°                             | 89.0730(10)                                                             |
| $\gamma$ /°                            | 71.4000(10)                                                             |
| Volume/Å <sup>3</sup>                  | 908.36(4)                                                               |
| Z                                      | 18                                                                      |
| $\rho_{\text{calc}}/\text{cm}^3$       | 1.310                                                                   |
| $\mu/\text{mm}^{-1}$                   | 0.658                                                                   |
| F(000)                                 | 380.0                                                                   |
| Crystal size/mm <sup>3</sup>           | 0.80 × 0.28 × 0.27                                                      |
| Radiation                              | CuK $\alpha$ ( $\lambda$ = 1.54178)                                     |
| 2 $\Theta$ range for data collection/° | 7.692 to 133.402                                                        |
| Index ranges                           | -9 ≤ h ≤ 8, -12 ≤ k ≤ 12, -14 ≤ l ≤ 14                                  |
| Reflections collected                  | 28821                                                                   |
| Independent reflections                | 3182 [ $R_{\text{int}}$ = 0.0634, $R_{\text{sigma}}$ = 0.0334]          |
| Data/restraints/parameters             | 3182/0/245                                                              |



Goodness-of-fit on  $F^2$  1.088  
Final R indexes [ $I \geq 2\sigma$ ]  
(I)  $R_1 = 0.0424$ ,  $wR_2 = 0.0985$   
Final R indexes [all data]  $R_1 = 0.0438$ ,  $wR_2 = 0.0994$   
Largest diff. peak/hole / e  
 $\text{\AA}^{-3}$  0.21/-0.25

The crystals were grown in dichloromethane solvent. The pure compound was dissolved in dichloromethane slow evaporation led to the crystal **5b**. The crystal data was collected in X-ray spectroscopy (Bruker Kappa Apex-2, CCD Area Detector), and the data was analyzed using OLEX2 software. The structure is given below. The corresponding cif file has been uploaded separately as supporting information.

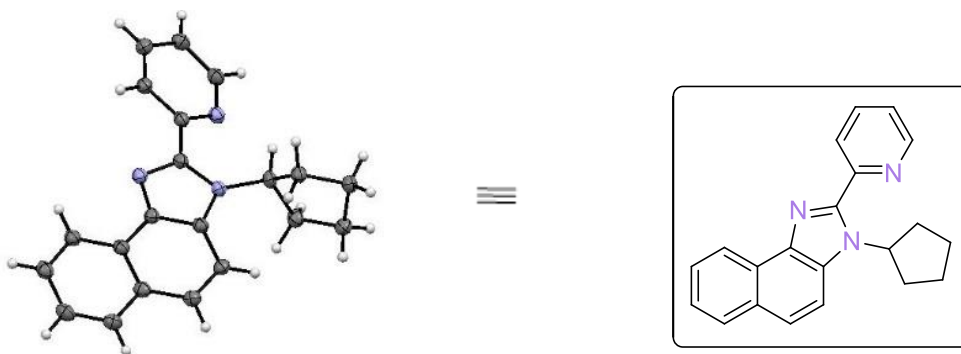

Thermal ellipsoid plot of **5b**. Ellipsoids are represented with 50% probability.

X-ray determined molecular structure of **5b**, CCDC: 2025279

|                                    |                                                               |
|------------------------------------|---------------------------------------------------------------|
| Identification code                | HM_788_1_0m_a                                                 |
| Empirical formula                  | C <sub>21</sub> H <sub>19</sub> N <sub>3</sub>                |
| Formula weight                     | 313.41                                                        |
| Temperature/K                      | 100.0                                                         |
| Crystal system                     | monoclinic                                                    |
| Space group                        | P2 <sub>1</sub> /c                                            |
| a/Å                                | 15.2933(10)                                                   |
| b/Å                                | 5.6759(9)                                                     |
| c/Å                                | 18.003(3)                                                     |
| α/°                                | 90                                                            |
| β/°                                | 99.217(8)                                                     |
| γ/°                                | 90                                                            |
| Volume/Å <sup>3</sup>              | 1542.5(4)                                                     |
| Z                                  | 4                                                             |
| ρ <sub>calc</sub> /cm <sup>3</sup> | 1.3495                                                        |
| μ/mm <sup>-1</sup>                 | 0.627                                                         |
| F(000)                             | 665.9                                                         |
| Crystal size/mm <sup>3</sup>       | 0.2 × 0.2 × 0.2                                               |
| Radiation                          | Cu Kα (λ = 1.54178)                                           |
| 2θ range for data collection/°     | 5.86 to 143.7                                                 |
| Index ranges                       | -18 ≤ h ≤ 18, -6 ≤ k ≤ 6, -21 ≤ l ≤ 22                        |
| Reflections collected              | 22846                                                         |
| Independent reflections            | 2934 [R <sub>int</sub> = 0.0804, R <sub>sigma</sub> = 0.0465] |
| Data/restraints/parameters         | 2934/0/218                                                    |
| Goodness-of-fit on F <sup>2</sup>  | 1.048                                                         |

Final R indexes [ $I \geq 2\sigma$ ]  
(D)  $R_1 = 0.0531$ ,  $wR_2 = 0.1361$

Final R indexes [all data]  $R_1 = 0.0570$ ,  $wR_2 = 0.1400$

Largest diff. peak/hole / e  
 $\text{\AA}^{-3}$  0.22/-0.34

### **Spectral data:**

#### ***N*-(naphthalen-1-yl)pyridine-2-carbothioamide (4a)**

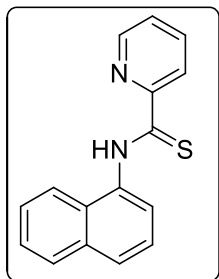

Column chromatography ( $\text{SiO}_2$ , eluting with 95:5 hexane/ethyl acetate) afforded the desired product as a yellow solid, mp 124-126 °C.

$^1\text{H}$  NMR (400 MHz,  $\text{CDCl}_3$ ):  $\delta$  12.36 (s, 1H), 8.84 (dt,  $J_1 = 8.0$  Hz,  $J_2 = 0.8$  Hz, 1H), 8.63-8.61 (m, 1H), 8.33 (d,  $J = 7.2$  Hz, 1H), 8.03-7.99 (m, 1H), 7.95-7.89 (m, 2H), 7.85 (d,  $J = 8.4$  Hz, 1H), 7.60-7.49 (m, 4H);  $^{13}\text{C}$  NMR (100 MHz,  $\text{CDCl}_3$ ):  $\delta$  190.2, 151.5, 146.8, 137.7, 134.4, 134.3, 128.9, 128.4, 127.7, 126.8, 126.5, 126.3, 125.5, 125.3, 122.9, 121.6; HRMS (ESI,  $m/z$ ) calcd. For  $\text{C}_{16}\text{H}_{13}\text{N}_2\text{S}$  [ $\text{M}+\text{H}$ ] $^+$ : 265.0799; found: 265.0802.

#### ***N*-(naphthalen-1-yl)picolinimidamide (4a')**

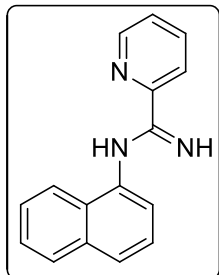

Washing with distilled hexane afforded the desired product as a violet solid, mp 118-120 °C.

$^1\text{H}$  NMR (400 MHz,  $\text{CDCl}_3$ ):  $\delta$  8.63 (d,  $J = 8.0$  Hz, 1H), 8.61-8.59 (m, 1H), 8.10 (d,  $J = 8.0$  Hz, 1H), 7.89-7.83 (m, 2H), 7.59 (d,  $J = 8.4$  Hz, 1H), 7.49-7.38 (m, 4H), 7.09 (d,  $J = 7.6$  Hz, 1H), 6.29-5.17 (br. s);  $^{13}\text{C}$  NMR (100 MHz,  $\text{CDCl}_3$ ):  $\delta$  152.9, 151.3, 148.1, 137.0, 134.8, 128.1, 127.4, 126.4, 126.2, 125.4, 123.9, 123.4, 122.0, 116.3; HRMS (ESI,  $m/z$ ) calcd. For  $\text{C}_{16}\text{H}_{14}\text{N}_3$   $[\text{M}+\text{H}]^+$ : 248.1188; found: 248.1185.

***N*-(2-(cyclohexylamino)naphthalen-1-yl)picolinamide (1a')**

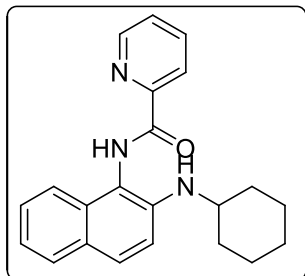

Column chromatography ( $\text{SiO}_2$ , eluting with 85:15 hexane/ethyl acetate) afforded the desired product as a brown gummy liquid.

$^1\text{H}$  NMR (400 MHz,  $\text{CDCl}_3$ ):  $\delta$  9.76 (s, 1H), 8.68-8.67 (m, 1H), 8.34 (dt,  $J_1 = 7.6$  Hz,  $J_2 = 1.2$  Hz, 1H), 7.91 (td,  $J_1 = 7.6$  Hz,  $J_2 = 1.6$  Hz, 1H), 7.73-7.68 (m, 3H), 7.51-7.48 (m, 1H), 7.41-7.37 (m, 1H), 7.23-7.19 (m, 2H), 3.51-3.44 (m, 1H), 2.12-2.08 (m, 2H), 1.79-1.74 (m, 2H), 1.65-1.61 (m, 1H), 1.43-1.21 (m, 5H);  $^{13}\text{C}$  NMR (100 MHz,  $\text{CDCl}_3$ ):  $\delta$  163.4, 149.8, 148.4, 141.5, 137.7, 131.5, 128.7, 128.3, 127.3, 127.0, 126.6, 122.8, 122.1, 120.5, 115.4, 113.0, 51.9, 33.8, 25.9, 25.1; HRMS (ESI,  $m/z$ ) calcd. For  $\text{C}_{22}\text{H}_{24}\text{N}_3\text{O}$   $[\text{M}+\text{H}]^+$ : 346.1919; found: 346.1922.

***N*-(naphthalen-1-yl)benzamide (6)**

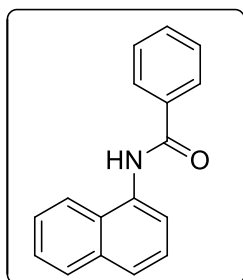

Column chromatography ( $\text{SiO}_2$ , eluting with 90:10 hexane/ethyl acetate) afforded the desired product as white fluffy solid.

$^1\text{H}$  NMR (400 MHz,  $\text{CDCl}_3$ ):  $\delta$  8.27 (s, 1H), 7.98-7.95 (m, 3H), 7.90-7.87 (m, 2H), 7.73 (d,  $J = 8.4$  Hz, 1H), 7.58-7.55 (m, 1H), 7.51-7.46 (m, 5H);  $^{13}\text{C}$  NMR (100 MHz,  $\text{CDCl}_3$ ):  $\delta$  166.4, 134.9, 134.3, 132.5, 132.0, 128.94, 128.90, 127.6, 127.3, 126.5, 126.2, 126.1, 125.9, 121.5, 120.9.

***N*-(2-(cyclohexylamino)naphthalen-1-yl)benzamide (7)**

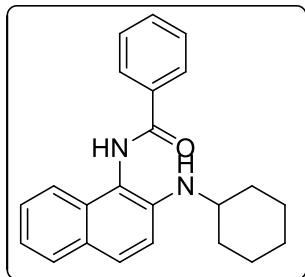

Column chromatography (SiO<sub>2</sub>, eluting with 90:10 hexane/ethyl acetate) afforded the desired product as white fluffy solid.

<sup>1</sup>H NMR (400 MHz, CDCl<sub>3</sub> + CD<sub>3</sub>OD): δ 8.01-7.98 (m, 2H), 7.68-7.64 (m, 2H), 7.58-7.51 (m, 2H), 7.49-7.45 (m, 2H), 7.33-7.28 (m, 1H), 7.17-7.01 (m, 2H), 3.39-3.30 (m, 1H), 1.98 (d, *J* = 12.8 Hz, 2H), 1.69-1.61 (m, 2H), 1.58-1.54 (m, 1H), 1.35-1.12 (m, 5H); <sup>13</sup>C NMR (100 MHz, CDCl<sub>3</sub>+ CD<sub>3</sub>OD): δ 171.8, 137.7, 136.1, 135.6, 133.0, 132.8, 132.1, 132.0, 131.6, 131.0, 126.5, 124.8, 119.8, 56.8, 37.3, 33.6, 29.6, 28.9; HRMS (ESI, *m/z*) calcd. For C<sub>23</sub>H<sub>25</sub>N<sub>2</sub>O [M+H]<sup>+</sup>: 345.1967; found: 345.1964.

#### ***O*-benzoyl-*N*-cyclohexylhydroxylamine (2a)**

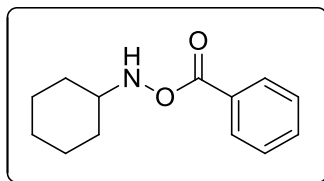

Column chromatography (SiO<sub>2</sub>, eluting with 98:2 hexane/ethyl acetate) afforded the desired product as colourless liquid.

<sup>1</sup>H NMR (400 MHz, CDCl<sub>3</sub>): δ 8.02-7.99 (m, 2H), 7.58-7.53 (m, 1H), 7.45-7.41 (m, 2H), 3.07-2.99 (m, 1H), 1.98-1.94 (m, 2H), 1.81-1.74 (m, 2H), 1.64-1.59 (m, 1H), 1.31-1.17 (m, 5H); <sup>13</sup>C NMR (100 MHz, CDCl<sub>3</sub>): δ 167.0, 133.3, 129.4, 128.6, 59.9, 30.4, 25.9, 24.1.

#### ***O*-benzoyl-*N*-butylhydroxylamine (2g)**

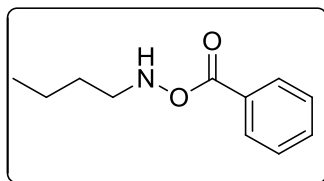

Column chromatography (SiO<sub>2</sub>, eluting with 98:2 hexane/ethyl acetate) afforded the desired product as colourless liquid.

$^1\text{H}$  NMR (400 MHz,  $\text{CDCl}_3$ ):  $\delta$  8.03-7.99 (m, 2H), 7.86 (br. s, 1H), 7.58-7.54 (m, 1H), 7.46-7.42 (m, 2H), 3.13 (t,  $J = 7.2$  Hz, 2H), 1.63-1.56 (m, 2H), 1.47-1.38 (m, 2H), 0.94 (t,  $J = 7.6$  Hz, 3H);  $^{13}\text{C}$  NMR (100 MHz,  $\text{CDCl}_3$ ):  $\delta$  167.0, 133.4, 129.4, 128.6, 52.4, 29.3, 20.3, 13.9.

***O*-benzoyl-*N*-isobutylhydroxylamine (2h)**

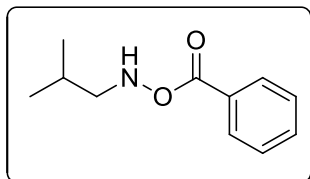

Column chromatography ( $\text{SiO}_2$ , eluting with 98:2 hexane/ethyl acetate) afforded the desired product as colourless liquid.

$^1\text{H}$  NMR (400 MHz,  $\text{CDCl}_3$ ):  $\delta$  8.02-7.99 (m, 2H), 7.96 (br. s, 1H), 7.58-7.54 (m, 1H), 7.46-7.41 (m, 2H), 2.95 (d,  $J = 6.8$  Hz, 2H), 1.99-1.89 (m, 1H), 1.00 (d,  $J = 6.8$  Hz, 6H);  $^{13}\text{C}$  NMR (100 MHz,  $\text{CDCl}_3$ ):  $\delta$  166.9, 133.4, 129.4, 128.6, 60.2, 26.5, 20.6.

***O*-benzoyl-*N*-(*sec*-butyl)hydroxylamine (2i)**

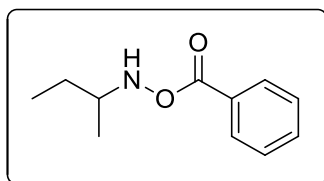

Column chromatography ( $\text{SiO}_2$ , eluting with 98:2 hexane/ethyl acetate) afforded the desired product as colourless liquid.

$^1\text{H}$  NMR (400 MHz,  $\text{CDCl}_3$ ):  $\delta$  8.03-7.99 (m, 2H), 7.58-7.54 (m, 1H), 7.46-7.42 (m, 2H), 3.11 (sextet,  $J = 6.4$  Hz, 1H), 1.71-1.61 (m, 1H), 1.50-1.39 (m, 1H), 1.17 (d,  $J = 6.4$  Hz, 3H), 0.98 (t,  $J = 7.2$  Hz, 3H);  $^{13}\text{C}$  NMR (100 MHz,  $\text{CDCl}_3$ ):  $\delta$  167.0, 133.3, 129.4, 128.6, 58.2, 26.8, 17.6, 10.3.

***N*-((3*s*,5*s*,7*s*)-adamantan-1-yl)-*O*-benzoylhydroxylamine (2m)**

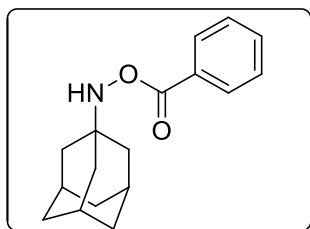

Column chromatography ( $\text{SiO}_2$ , eluting with 98:2 hexane/ethyl acetate) afforded the desired product as crystalline solid.

$^1\text{H}$  NMR (400 MHz,  $\text{CDCl}_3$ ):  $\delta$  8.03-8.01 (m, 2H), 7.59-7.55 (m, 1H), 7.47-7.43 (m, 2H), 2.11 (s, 3H), 1.76 (d,  $J = 2.8$  Hz, 6H), 1.71-1.62 (m, 6H);  $^{13}\text{C}$  NMR (100 MHz,  $\text{CDCl}_3$ ):  $\delta$  167.0, 133.3, 129.4, 128.6, 56.4, 40.1, 36.5, 29.2.

***O*-benzoyl-*N*-(1-phenylethyl)hydroxylamine (2n)**

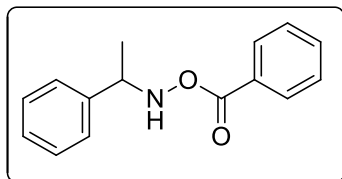

Column chromatography ( $\text{SiO}_2$ , eluting with 98:2 hexane/ethyl acetate) afforded the desired product as colourless liquid.

$^1\text{H}$  NMR (400 MHz,  $\text{CDCl}_3$ ):  $\delta$  7.97-7.94 (m, 2H), 7.56-7.51 (m, 1H), 7.45-7.35 (m, 6H), 7.32-7.28 (m, 1H), 4.34 (q,  $J = 6.8$  Hz, 2H), 1.55 (d,  $J = 6.8$  Hz, 3H);  $^{13}\text{C}$  NMR (100 MHz,  $\text{CDCl}_3$ ):  $\delta$  166.9, 141.3, 133.4, 129.4, 128.7, 128.6, 128.5, 127.9, 127.2, 61.0, 19.8.

**3-cyclohexyl-1-(pyridin-2-yl)-1H-naphtho[1,2-d]imidazol-2(3H)-one (3a)**

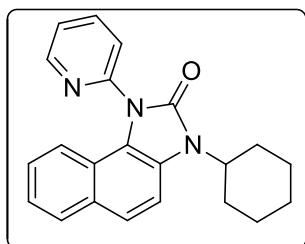

The general procedure 1 for imidazolone was followed. Column chromatography ( $\text{SiO}_2$ , eluting with 75:25 hexane/ethyl acetate) afforded the desired product as a light brown solid (63.8 mg, 93% yield), mp 142-144 °C.

$^1\text{H}$  NMR (400 MHz,  $\text{CDCl}_3$ ):  $\delta$  8.67-8.65 (m, 1H), 7.97 (td,  $J_1 = 8.0$  Hz,  $J_2 = 2.0$  Hz, 1H), 7.82 (d,  $J = 8.0$  Hz, 1H), 7.70 (dt,  $J_1 = 8.0$  Hz,  $J_2 = 0.8$  Hz, 1H), 7.64 (d,  $J = 8.8$  Hz, 1H), 7.51 (d,  $J = 8.8$  Hz, 1H), 7.45-7.41 (m, 1H), 7.29-7.25 (m, 1H), 7.19-7.15 (m, 1H), 6.96 (d,  $J = 8.0$  Hz, 1H), 4.42-4.34 (m, 1H), 2.33-2.22 (m, 2H), 1.99-1.92 (m, 4H), 1.77 (d,  $J = 12.8$  Hz, 1H), 1.53-1.42 (m, 2H), 1.36-1.29 (m, 1H);  $^{13}\text{C}$  NMR (100 MHz,  $\text{CDCl}_3$ ):  $\delta$  153.7, 150.2, 149.6, 138.8, 129.9, 129.2, 126.0, 125.8, 123.7, 123.5, 123.2, 121.8, 121.3, 120.4, 110.4, 53.7, 30.4, 26.2, 25.5; HRMS (ESI,  $m/z$ ) calcd. For  $\text{C}_{22}\text{H}_{22}\text{N}_3\text{O}$  [ $\text{M}+\text{H}$ ] $^+$ : 344.1763; found: 344.1760.

**3-cyclopentyl-1-(pyridin-2-yl)-1H-naphtho[1,2-d]imidazol-2(3H)-one (3b)**

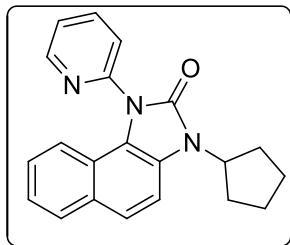

The general procedure 1 for imidazolone was followed. Column chromatography (SiO<sub>2</sub>, eluting with 75:25 hexane/ethyl acetate) afforded the desired product as a light brown solid (51 mg, 78% yield), mp 138-140 °C.

<sup>1</sup>H NMR (400 MHz, CDCl<sub>3</sub>): δ 8.67-8.65 (m, 1H), 7.97 (td, *J*<sub>1</sub> = 8.0 Hz, *J*<sub>2</sub> = 2.0 Hz, 1H), 7.82 (dd, *J*<sub>1</sub> = 8.4 Hz, *J*<sub>2</sub> = 0.4 Hz, 1H), 7.69 (dt, *J*<sub>1</sub> = 8.0 Hz, *J*<sub>2</sub> = 0.8 Hz, 1H), 7.65 (d, *J* = 8.8 Hz, 1H), 7.45-7.40 (m, 2H), 7.29-7.24 (m, 1H), 7.19-7.15 (m, 1H), 6.97 (d, *J* = 8.8 Hz, 1H), 4.97 (quintet, *J* = 8.8 Hz, 1H), 2.29-2.20 (m, 2H), 2.14-1.97 (m, 4H), 1.80-1.73 (m, 2H); <sup>13</sup>C NMR(100 MHz, CDCl<sub>3</sub>):δ 153.9, 150.2, 149.6, 138.8, 130.0, 129.2, 125.8, 125.6, 123.8, 123.6, 123.5, 123.3, 121.9, 121.2, 120.5, 110.1, 54.0, 29.3, 25.3; HRMS (ESI, m/z) calcd. For C<sub>21</sub>H<sub>20</sub>N<sub>3</sub>O [M+H]<sup>+</sup>: 330.1606; found: 330.1644.

### 3-cycloheptyl-1-(pyridin-2-yl)-1H-naphtho[1,2-d]imidazol-2(3H)-one (3c)

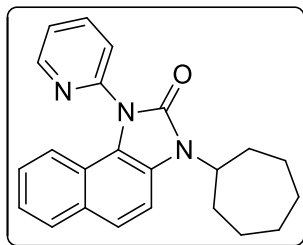

The general procedure 1 for imidazolone was followed. Column chromatography (SiO<sub>2</sub>, eluting with 75:25 hexane/ethyl acetate) afforded the desired product as a light brown solid (46.4 mg, 65% yield), mp 154-156 °C.

<sup>1</sup>H NMR (400 MHz, CDCl<sub>3</sub>): δ 8.67-8.65 (m, 1H), 7.98 (td, *J*<sub>1</sub> = 8.0 Hz, *J*<sub>2</sub> = 2.0 Hz, 1H), 7.82 (d, *J* = 8.4 Hz, 1H), 7.70 (dt, *J*<sub>1</sub> = 8.0 Hz, *J*<sub>2</sub> = 0.8 Hz, 1H), 7.64 (d, *J* = 8.8 Hz, 1H), 7.47-7.42 (m, 2H), 7.29-7.25 (m, 1H), 7.19-7.15 (m, 1H), 6.97 (d, *J* = 8.8 Hz, 1H), 4.62-4.55 (m, 1H), 2.37-2.29 (m, 2H), 2.07-2.03 (m, 2H), 1.88-1.85 (m, 2H), 1.73-1.64 (m, 6H); <sup>13</sup>C NMR (100 MHz, CDCl<sub>3</sub>): δ 153.5, 150.2, 149.5, 138.8, 130.0, 129.2, 125.8, 125.7, 123.7, 123.49, 123.47, 123.3, 121.8, 121.3, 120.5, 110.5, 55.6, 32.9, 27.7, 25.9; HRMS (ESI, m/z) calcd. For C<sub>23</sub>H<sub>24</sub>N<sub>3</sub>O [M+H]<sup>+</sup>: 358.1919; found: 358.1921.

### 3-cyclooctyl-1-(pyridin-2-yl)-1H-naphtho[1,2-d]imidazol-2(3H)-one (3d)



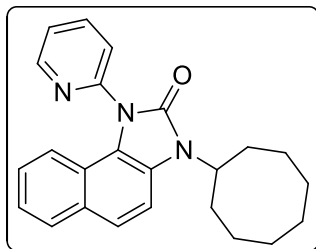

The general procedure 1 for imidazolone was followed. Column chromatography (SiO<sub>2</sub>, eluting with 75:25 hexane/ethyl acetate) afforded the desired product as a light brown solid (34 mg, 46% yield), mp 156-158 °C.

<sup>1</sup>H NMR (400 MHz, CDCl<sub>3</sub>): δ 8.66-8.64 (m, 1H), 7.97 (td, *J*<sub>1</sub> = 8.0 Hz, *J*<sub>2</sub> = 2.0 Hz, 1H), 7.82 (d, *J* = 8.0 Hz, 1H), 7.71 (dt, *J*<sub>1</sub> = 8.0 Hz, *J*<sub>2</sub> = 0.8 Hz, 1H), 7.64 (d, *J* = 8.8 Hz, 1H), 7.45-7.41 (m, 2H), 7.29-7.25 (m, 1H), 7.19-7.15 (m, 1H), 6.99 (d, *J* = 8.8 Hz, 1H), 4.75-4.69 (m, 1H), 2.39-2.31 (m, 2H), 2.02-1.97 (m, 2H), 1.89-1.84 (m, 2H), 1.79-1.60 (m, 8H); <sup>13</sup>C NMR (100 MHz, CDCl<sub>3</sub>): δ 153.5, 150.2, 149.5, 138.7, 130.0, 129.2, 125.8, 125.5, 123.6, 123.5, 123.4, 123.3, 121.9, 121.3, 120.5, 110.6, 54.1, 32.6, 26.4, 26.2, 25.5; HRMS (ESI, *m/z*) calcd. For C<sub>24</sub>H<sub>26</sub>N<sub>3</sub>O [M+H]<sup>+</sup>: 372.2076; found: 372.2076.

### 3-ethyl-1-(pyridin-2-yl)-1H-naphtho[1,2-d]imidazol-2(3H)-one (3e)

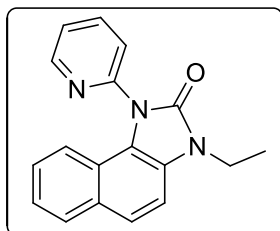

The general procedure 1 for imidazolone was followed. Column chromatography (SiO<sub>2</sub>, eluting with 75:25 hexane/ethyl acetate) afforded the desired product as a light brown solid (29 mg, 50% yield), mp 96-98 °C.

<sup>1</sup>H NMR (400 MHz, CDCl<sub>3</sub>): δ 8.68-8.66 (m, 1H), 7.98 (td, *J*<sub>1</sub> = 8.0 Hz, *J*<sub>2</sub> = 2.0 Hz, 1H), 7.84 (d, *J* = 8.0 Hz, 1H), 7.72-7.68 (m, 2H), 7.46-7.42 (m, 1H), 7.34 (d, *J* = 8.4 Hz, 1H), 7.31-7.27 (m, 1H), 7.22-7.18 (m, 1H), 7.02 (d, *J* = 9.2 Hz, 1H), 4.09 (q, *J* = 7.2 Hz, 2H), 1.43 (t, *J* = 7.2 Hz, 3H); <sup>13</sup>C NMR (100 MHz, CDCl<sub>3</sub>): δ 153.9, 150.1, 149.6, 138.9, 130.4, 129.3, 126.2, 125.9, 123.8, 123.7, 123.5, 123.4, 121.8, 121.2, 120.5, 108.9, 36.3, 13.9; HRMS (ESI, *m/z*) calcd. For C<sub>18</sub>H<sub>16</sub>N<sub>3</sub>O [M+H]<sup>+</sup>: 290.1293; found: 290.1296.

### 3-propyl-1-(pyridin-2-yl)-1H-naphtho[1,2-d]imidazol-2(3H)-one (3f)

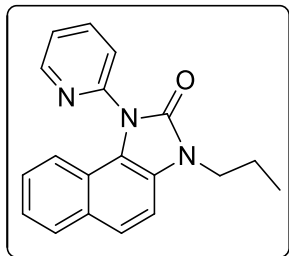

The general procedure 1 for imidazolone was followed. Column chromatography (SiO<sub>2</sub>, eluting with 75:25 hexane/ethyl acetate) afforded the desired product as a light brown solid (39.4 mg, 65% yield), mp 134-136 °C.

<sup>1</sup>H NMR (400 MHz, CDCl<sub>3</sub>): δ 8.66 (d, *J* = 3.6 Hz, 1H), 7.97 (t, *J* = 7.6 Hz, 1H), 7.82 (d, *J* = 8.4 Hz, 1H), 7.71-7.66 (m, 2H), 7.45-7.41 (m, 1H), 7.33 (d, *J* = 8.4 Hz, 1H), 7.27 (t, *J* = 7.2 Hz, 1H), 7.19 (t, *J* = 8.0 Hz, 1H), 7.01 (d, *J* = 8.8 Hz, 1H), 3.98 (t, *J* = 7.2 Hz, 2H), 1.87 (sextet, *J* = 7.2 Hz, 2H), 1.02 (t, *J* = 7.2 Hz, 3H); <sup>13</sup>C NMR (100 MHz, CDCl<sub>3</sub>): δ 154.2, 150.1, 149.6, 138.8, 130.4, 129.3, 126.6, 125.9, 123.8, 123.7, 123.5, 123.4, 121.7, 121.3, 120.5, 109.1, 43.1, 22.1, 11.5; HRMS (ESI, *m/z*) calcd. For C<sub>19</sub>H<sub>18</sub>N<sub>3</sub>O [M+H]<sup>+</sup>: 304.1450; found: 304.1451.

### 3-butyl-1-(pyridin-2-yl)-1H-naphtho[1,2-d]imidazol-2(3H)-one (3g)

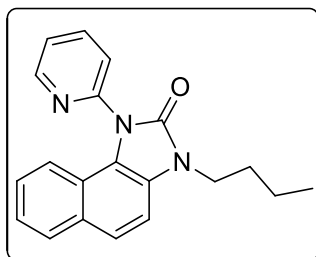

The general procedure 1 for imidazolone was followed. Column chromatography (SiO<sub>2</sub>, eluting with 75:25 hexane/ethyl acetate) afforded the desired product as a creamy white solid (52 mg, 82% yield), mp 104-106 °C.

<sup>1</sup>H NMR (400 MHz, CDCl<sub>3</sub>): δ 8.68-8.67 (m, 1H), 7.99 (td, *J*<sub>1</sub> = 8.0 Hz, *J*<sub>2</sub> = 2.0 Hz, 1H), 7.85-7.83 (m, 1H), 7.72 (dt, *J*<sub>1</sub> = 8.0 Hz, *J*<sub>2</sub> = 0.8 Hz, 1H), 7.69 (d, *J* = 8.8 Hz, 1H), 7.47-7.43 (m, 1H), 7.34 (d, *J* = 8.8 Hz, 1H), 7.31-7.27 (m, 1H), 7.22-7.18 (m, 1H), 7.04-7.02 (m, 1H), 4.03 (t, *J* = 7.2 Hz, 2H), 1.86-1.79 (m, 2H), 1.51-1.41 (m, 2H), 0.97 (t, *J* = 7.6 Hz, 3H); <sup>13</sup>C NMR (100 MHz, CDCl<sub>3</sub>): δ 154.2, 150.1, 149.5, 138.9, 130.4, 129.3, 126.6, 125.9, 123.8, 123.7, 123.5, 123.4, 121.7, 121.3, 120.5, 109.1, 41.3, 30.8, 20.2, 13.8; HRMS (ESI, *m/z*) calcd. For C<sub>20</sub>H<sub>20</sub>N<sub>3</sub>O [M+H]<sup>+</sup>: 318.1606; found: 318.1657.

### 3-isobutyl-1-(pyridin-2-yl)-1H-naphtho[1,2-d]imidazol-2(3H)-one (3h)

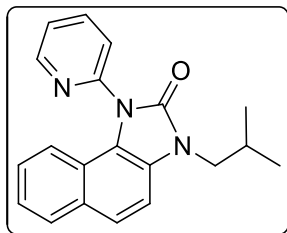

The general procedure 1 for imidazolone was followed. Column chromatography (SiO<sub>2</sub>, eluting with 75:25 hexane/ethyl acetate) afforded the desired product as a light brown solid (40 mg, 63% yield). mp 112-114 °C.

<sup>1</sup>H NMR (400 MHz, CDCl<sub>3</sub>): δ 8.67 (s, 1H), 7.98 (td, *J*<sub>1</sub> = 7.6 Hz, *J*<sub>2</sub> = 1.6 Hz, 1H), 7.83 (d, *J* = 7.6 Hz, 1H), 7.72 (d, *J* = 8.0 Hz, 1H), 7.67 (d, *J* = 8.8 Hz, 1H), 7.46-7.43 (m, 1H), 7.34-7.26 (m, 2H), 7.22-7.18 (m, 1H), 7.03 (d, *J* = 8.4 Hz, 1H), 3.82 (d, *J* = 7.6 Hz, 2H), 2.34-2.24 (m, 1H), 1.02 (d, *J* = 6.8 Hz, 6H); <sup>13</sup>C NMR (100 MHz, CDCl<sub>3</sub>): δ 154.5, 150.1, 149.4, 138.8, 130.4, 129.3, 126.9, 125.9, 123.7, 123.5, 123.4, 121.6, 121.3, 120.5, 109.4, 48.9, 28.3, 20.3; HRMS (ESI, *m/z*) calcd. For C<sub>20</sub>H<sub>20</sub>N<sub>3</sub>O [M+H]<sup>+</sup>: 318.1606; found: 318.1608.

### 3-(sec-butyl)-1-(pyridin-2-yl)-1H-naphtho[1,2-d]imidazol-2(3H)-one (3i)

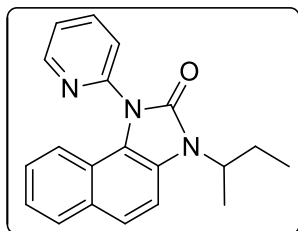

The general procedure 1 for imidazolone was followed. Column chromatography (SiO<sub>2</sub>, eluting with 75:25 hexane/ethyl acetate) afforded the desired product as light brown solid (60 mg, 95% yield), mp 112-114 °C.

<sup>1</sup>H NMR (400 MHz, CDCl<sub>3</sub>): δ 8.68-8.66 (m, 1H), 7.98 (td, *J*<sub>1</sub> = 7.6 Hz, *J*<sub>2</sub> = 2.0 Hz, 1H), 7.82 (d, *J* = 8.0 Hz, 1H), 7.71 (dt, *J*<sub>1</sub> = 8.0 Hz, *J*<sub>2</sub> = 0.8 Hz, 1H), 7.65 (d, *J* = 8.4 Hz, 1H), 7.46-7.42 (m, 2H), 7.30-7.26 (m, 1H), 7.20-7.16 (m, 1H), 6.99 (dd, *J*<sub>1</sub> = 8.8 Hz, *J*<sub>2</sub> = 0.8 Hz, 1H), 4.61-4.51 (m, 1H), 2.24-2.13 (m, 1H), 1.98-1.87 (m, 1H), 1.61 (d, *J* = 6.8 Hz, 3H), 0.93 (t, *J* = 7.6 Hz, 3H); <sup>13</sup>C NMR (100 MHz, CDCl<sub>3</sub>): δ 153.9, 150.1, 149.5, 138.8, 130.0, 129.2, 126.0, 125.8, 123.7, 123.6, 123.5, 123.4, 121.8, 121.3, 120.5, 110.2, 51.8, 27.6, 18.8, 11.5; HRMS (ESI, *m/z*) calcd. For C<sub>20</sub>H<sub>20</sub>N<sub>3</sub>O [M+H]<sup>+</sup>: 318.1606; found: 318.1610.

### 3-(tert-butyl)-1-(pyridin-2-yl)-1H-naphtho[1,2-d]imidazol-2(3H)-one (3j)

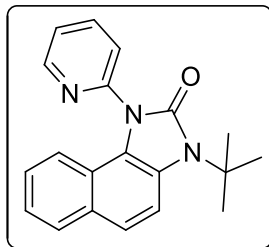

The general procedure 1 for imidazolone was followed. Column chromatography (SiO<sub>2</sub>, eluting with 75:25 hexane/ethyl acetate) afforded the desired product as a creamy white powder (59.6 mg, 94% yield), mp 154–156 °C.

<sup>1</sup>H NMR (400 MHz, CDCl<sub>3</sub>): δ 8.67 (dd, *J*<sub>1</sub> = 4.8 Hz, *J*<sub>2</sub> = 1.2 Hz, 1H), 7.96 (td, *J*<sub>1</sub> = 8.0 Hz, *J*<sub>2</sub> = 2.0 Hz, 1H), 7.79 (d, *J* = 8.0 Hz, 1H), 7.75 (d, *J* = 9.2 Hz, 1H), 7.66 (d, *J* = 8.0 Hz, 1H), 7.58 (d, *J* = 9.2 Hz, 1H), 7.45–7.42 (m, 1H), 7.28–7.24 (m, 1H), 7.15–7.11 (m, 1H), 6.85 (d, *J* = 8.8 Hz, 1H), 1.88 (s, 9H); <sup>13</sup>C NMR (100 MHz, CDCl<sub>3</sub>): δ 154.1, 150.4, 149.7, 138.8, 129.7, 128.9, 126.6, 125.7, 124.0, 123.8, 123.7, 122.6, 122.4, 121.3, 120.0, 113.1, 58.8, 29.8; HRMS (ESI, *m/z*) calcd. For C<sub>20</sub>H<sub>20</sub>N<sub>3</sub>O [M+H]<sup>+</sup>: 318.1606; found: 318.1606.

**1-(pyridin-2-yl)-3-(2,4,4-trimethylpentan-2-yl)-1H-naphtho[1,2-d]imidazol-2(3H)-one (3k)**

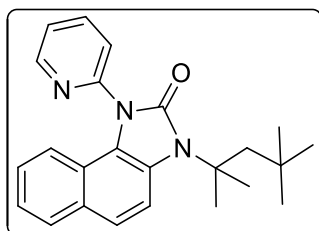

The general procedure 1 for imidazolone was followed. Column chromatography (SiO<sub>2</sub>, eluting with 75:25 hexane/ethyl acetate) afforded the desired product as a creamy white solid (49 mg, 66% yield), mp 120–122 °C.

<sup>1</sup>H NMR (400 MHz, CDCl<sub>3</sub>): δ 8.68–8.66 (m, 1H), 7.95 (td, *J*<sub>1</sub> = 8.0 Hz, *J*<sub>2</sub> = 2.0 Hz, 1H), 7.81–7.78 (m, 2H), 7.62 (dt, *J*<sub>1</sub> = 8.0 Hz, *J*<sub>2</sub> = 0.4 Hz, 1H), 7.59 (d, *J* = 8.8 Hz, 1H), 7.45–7.41 (m, 1H), 7.29–7.25 (m, 1H), 7.16–7.12 (m, 1H), 6.86 (d, *J* = 8.8 Hz, 1H), 2.18 (s, 2H), 1.98 (s, 6H), 0.92 (s, 9H); <sup>13</sup>C NMR (100 MHz, CDCl<sub>3</sub>): δ 154.4, 150.5, 149.8, 138.8, 129.6, 128.8, 127.1, 125.6, 124.0, 123.8, 123.7, 122.51, 122.49, 121.4, 120.0, 113.5, 62.4, 51.1, 31.9, 31.2, 31.0; HRMS (ESI, *m/z*) calcd. For C<sub>24</sub>H<sub>28</sub>N<sub>3</sub>O [M+H]<sup>+</sup>: 374.2232; found: 374.2235.

**3-((3s)-adamantan-1-ylmethyl)-1-(pyridin-2-yl)-1H-naphtho[1,2-d]imidazol-2(3H)-one (3l)**

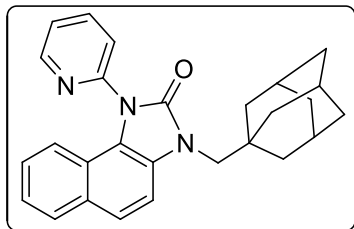

The general procedure 1 for imidazolone was followed. Column chromatography (SiO<sub>2</sub>, eluting with 80:20 hexane/ethyl acetate) afforded the desired product as a light brown solid (59 mg, 72% yield), mp 198–200 °C.

<sup>1</sup>H NMR (400 MHz, CDCl<sub>3</sub>): δ 8.68 (d, *J* = 3.6 Hz, 1H), 7.98 (td, *J*<sub>1</sub> = 8.0 Hz, *J*<sub>2</sub> = 2.0 Hz, 1H), 7.84-7.82 (m, 1H), 7.73 (d, *J* = 8.0 Hz, 1H), 7.66 (d, *J* = 8.4 Hz, 1H), 7.46-7.43 (m, 1H), 7.38 (d, *J* = 8.8 Hz, 1H), 7.31-7.26 (m, 1H), 7.22-7.18 (m, 1H), 7.05-7.02 (m, 1H), 3.69 (s, 2H), 1.98 (s, 3H), 1.71-1.60 (m, 12H); <sup>13</sup>C NMR (100 MHz, CDCl<sub>3</sub>): δ 155.2, 150.1, 149.4, 138.9, 130.3, 129.3, 128.2, 125.9, 123.67, 123.66, 123.4, 121.6, 121.3, 120.3, 110.3, 53.9, 41.2, 36.8, 36.4, 28.3; HRMS (ESI, *m/z*) calcd. For C<sub>27</sub>H<sub>28</sub>N<sub>3</sub>O [M+H]<sup>+</sup>: 410.2232; found: 410.2231.

### 3-((3s,5s,7s)-adamantan-1-yl)-1-(pyridin-2-yl)-1H-naphtho[1,2-d]imidazol-2(3H)-one (3m)

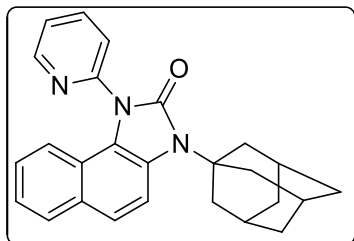

The general procedure 1 for imidazolone was followed. Column chromatography (SiO<sub>2</sub>, eluting with 80:20 hexane/ethyl acetate) afforded the desired product as a light brown solid (77 mg, 98% yield), mp 164-166 °C.

<sup>1</sup>H NMR (400 MHz, CDCl<sub>3</sub>): δ 8.67-8.65 (m, 1H), 7.98-7.93 (m, 1H), 7.85 (dd, *J*<sub>1</sub> = 8.8 Hz, *J*<sub>2</sub> = 1.2 Hz, 1H), 7.78 (d, *J* = 8.0 Hz, 1H), 7.66-7.63 (m, 1H), 7.54 (d, *J* = 9.2 Hz, 1H), 7.44-7.41 (m, 1H), 7.28-7.23 (m, 1H), 7.14-7.10 (m, 1H), 6.85 (d, *J* = 9.2 Hz, 1H), 2.68 (s, 6H), 2.25 (s, 3H), 1.80 (dd, *J*<sub>1</sub> = 32.4 Hz, *J*<sub>2</sub> = 12.0 Hz, 6H); <sup>13</sup>C NMR (100 MHz, CDCl<sub>3</sub>): δ 154.0, 150.5, 149.7, 138.7, 129.5, 128.8, 126.4, 125.6, 124.0, 123.72, 123.67, 122.6, 122.2, 121.3, 120.0, 113.6, 61.1, 40.9, 36.3, 30.1; HRMS (ESI, *m/z*) calcd. For C<sub>26</sub>H<sub>26</sub>N<sub>3</sub>O [M+H]<sup>+</sup>: 396.2076; found: 396.2076

### 3-(1-phenylethyl)-1-(pyridin-2-yl)-1H-naphtho[1,2-d]imidazol-2(3H)-one (3n)

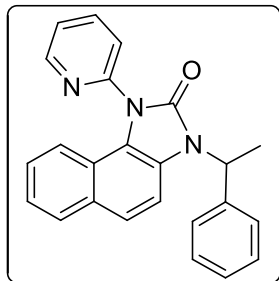

The general procedure 1 for imidazolone was followed. Column chromatography (SiO<sub>2</sub>, eluting with 75:25 hexane/ethyl acetate) afforded the desired product as a pale yellow solid (48.2 mg, 66% yield), mp 136-138 °C.

<sup>1</sup>H NMR (400 MHz, CDCl<sub>3</sub>): δ 8.70-8.69 (m, 1H), 8.01 (td, *J*<sub>1</sub> = 8.0 Hz, *J*<sub>2</sub> = 2.0 Hz, 1H), 7.78-7.75 (m, 2H), 7.49-7.44 (m, 4H), 7.36-7.32 (m, 2H), 7.29-7.24 (m, 2H), 7.19-7.16 (m, 1H), 7.02-6.98 (m, 2H), 6.01 (q, *J* = 7.2 Hz, 1H), 1.99 (d, *J* = 7.2 Hz, 3H); <sup>13</sup>C NMR (100 MHz, CDCl<sub>3</sub>): δ 154.2, 150.1, 149.6, 139.8, 138.9, 130.1, 129.2, 128.8, 127.7, 126.9, 125.8, 125.4, 123.8, 123.7, 123.5, 123.4, 121.9, 121.2, 120.4, 110.8, 51.2, 17.7; HRMS (ESI, *m/z*) calcd. For C<sub>24</sub>H<sub>20</sub>N<sub>3</sub>O [M+H]<sup>+</sup>: 366.1606; found: 366.1606.

### 3-(1-(naphthalen-1-yl)ethyl)-1-(pyridin-2-yl)-1H-naphtho[1,2-d]imidazol-2(3H)-one (3o)

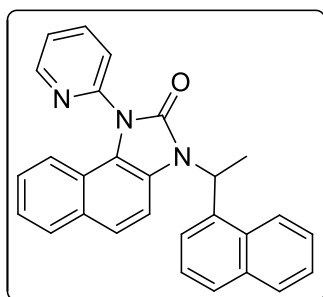

The general procedure 1 for imidazolone was followed. Column chromatography (SiO<sub>2</sub>, eluting with 75:25 hexane/ethyl acetate) afforded the desired product as a light brown solid (73 mg, 88% yield), mp 222-224 °C.

<sup>1</sup>H NMR (400 MHz, CDCl<sub>3</sub>): δ 8.69 (d, *J* = 4.8 Hz, 1H), 8.25 (d, *J* = 8.4 Hz, 1H), 8.01 (td, *J*<sub>1</sub> = 7.6 Hz, *J*<sub>2</sub> = 1.6 Hz, 1H), 7.96 (d, *J* = 7.2 Hz, 1H), 7.86 (d, *J* = 8.4 Hz, 1H), 7.81 (d, *J* = 8.0 Hz, 1H), 7.77 (d, *J* = 8.0 Hz, 1H), 7.68 (d, *J* = 8.4 Hz, 1H), 7.58 (t, *J* = 8.0 Hz, 1H), 7.51- 7.40 (m, 3H), 7.36 (d, *J* = 8.8 Hz, 1H), 7.22-7.18 (m, 1H), 7.14-7.10 (m, 2H), 6.93 (d, *J* = 8.8 Hz, 1H), 6.63 (q, *J* = 6.8 Hz, 1H), 2.11 (d, *J* = 6.8 Hz, 3H); <sup>13</sup>C NMR (100 MHz, CDCl<sub>3</sub>): δ 153.9, 150.1, 149.7, 138.9, 134.9, 134.0, 131.8, 129.9, 129.4, 129.1, 128.9, 127.1, 126.1, 125.7, 125.6, 125.0, 124.8, 123.8, 123.59, 123.57, 123.51, 123.3, 122.0, 121.2, 120.3, 110.6, 48.9, 18.1; HRMS (ESI, *m/z*) calcd. For C<sub>28</sub>H<sub>22</sub>N<sub>3</sub>O [M+H]<sup>+</sup>: 416.1763; found: 416.1766.

**tert-butyl 4-(2-oxo-1-(pyridin-2-yl)-1H-naphtho[1,2-d]imidazol-3(2H)-yl)piperidine-1-carboxylate (3p)**

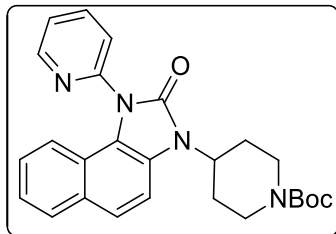

The general procedure 1 for imidazolone was followed. Column chromatography (SiO<sub>2</sub>, eluting with 70:30 hexane/ethyl acetate) afforded the desired product as a creamy white solid (80 mg, 90% yield), mp 174-176 °C.

<sup>1</sup>H NMR (400 MHz, CDCl<sub>3</sub>): δ 8.68-8.66 (m, 1H), 7.99 (td, *J*<sub>1</sub> = 8.0 Hz, *J*<sub>2</sub> = 2.0 Hz, 1H), 7.83 (d, *J* = 8.0 Hz, 1H), 7.69 (dt, *J*<sub>1</sub> = 8.0 Hz, *J*<sub>2</sub> = 0.8 Hz, 1H), 7.65 (d, *J* = 8.8 Hz, 1H), 7.48-7.45 (m, 2H), 7.31-7.27 (m, 1H), 7.20-7.16 (m, 1H), 6.94 (d, *J* = 8.8 Hz, 1H), 4.62-4.54 (m, 1H), 4.35-4.33 (br. s, 2H), 2.90 (t, *J* = 12.4 Hz, 2H), 2.50-2.40 (m, 2H), 1.92 (d, *J* = 12.4 Hz, 2H), 1.50 (s, 9H); <sup>13</sup>C NMR (100 MHz, CDCl<sub>3</sub>): δ 154.8, 153.6, 150.0, 149.7, 138.9, 130.1, 129.2, 125.9, 125.4, 123.9, 123.8, 123.52, 123.50, 121.9, 121.2, 120.4, 110.2, 80.0, 51.8, 29.5, 28.6; HRMS (ESI, *m/z*) calcd. For C<sub>26</sub>H<sub>29</sub>N<sub>4</sub>O<sub>3</sub> [M+H]<sup>+</sup>: 445.2240; found: 445.2237.

**3-cyclohexyl-5-phenyl-1-(pyridin-2-yl)-1H-naphtho[1,2-d]imidazol-2(3H)-one (3q)**

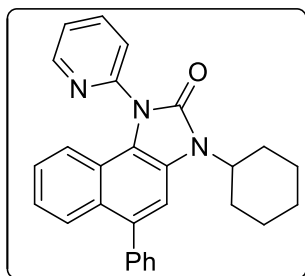

The general procedure 1 for imidazolone was followed. Column chromatography (SiO<sub>2</sub>, eluting with 75:25 hexane/ethyl acetate) afforded the desired product as a creamy white solid (67.8 mg, 81% yield), mp 186-188 °C.

<sup>1</sup>H NMR (400 MHz, CDCl<sub>3</sub>): δ 8.68-8.66 (m, 1H), 7.99 (td, *J*<sub>1</sub> = 7.6 Hz, *J*<sub>2</sub> = 2.0 Hz, 1H), 7.83-7.80 (m, 1H), 7.74 (dt, *J*<sub>1</sub> = 8.0 Hz, *J*<sub>2</sub> = 0.8 Hz, 1H), 7.53-7.48 (m, 4H), 7.47-7.42 (m, 3H), 7.23-7.16 (m, 2H), 7.05-7.03 (m, 1H), 4.41-4.33 (m, 1H), 2.33-2.23 (m, 2H), 1.99-1.90 (m, 4H), 1.73 (d, *J* = 13.2 Hz, 1H), 1.50-1.40 (m, 2H), 1.32-1.26 (m, 1H); <sup>13</sup>C NMR (100 MHz, CDCl<sub>3</sub>): δ 153.9, 150.3, 149.6, 141.1, 138.8, 136.0, 130.5, 128.4, 128.2, 127.46, 127.44, 125.71, 125.67, 123.63,

123.61, 123.4, 121.51, 121.46, 120.6, 111.4, 53.8, 30.4, 26.1, 25.4; HRMS (ESI, m/z) calcd. For  $C_{28}H_{26}N_3O$   $[M+H]^+$ : 420.2076; found: 420.2075.

### 5-bromo-3-cyclohexyl-1-(pyridin-2-yl)-1H-naphtho[1,2-d]imidazol-2(3H)-one (3r)

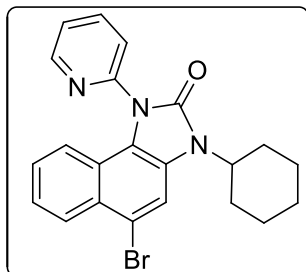

The general procedure 1 for imidazolone was followed. Column chromatography ( $SiO_2$ , eluting with 75:25 hexane/ethyl acetate) afforded the desired product as a creamy white solid (68 mg, 81% yield), mp 168-170 °C.

$^1H$  NMR (400 MHz,  $CDCl_3$ ):  $\delta$  8.65-8.63 (m, 1H), 8.25-8.22 (m, 1H), 7.98 (td,  $J_1 = 7.6$  Hz,  $J_2 = 2.0$  Hz, 1H), 7.83 (s, 1H), 7.69 (dt,  $J_1 = 8.0$  Hz,  $J_2 = 0.8$  Hz, 1H), 7.46-7.43 (m, 1H), 7.40-7.35 (m, 1H), 7.40-7.35 (m, 1H), 7.22-7.18 (m, 1H), 6.99-6.96 (m, 1H), 4.36-4.28 (m, 1H), 2.29-2.19 (m, 2H), 1.95 (d,  $J = 11.2$  Hz, 4H), 1.77 (d,  $J = 12.8$  Hz, 1H), 1.52-1.42 (m, 2H), 1.38-1.30 (m, 1H);  $^{13}C$  NMR (100 MHz,  $CDCl_3$ ):  $\delta$  153.6, 150.0, 149.7, 138.9, 128.5, 127.8, 126.5, 126.2, 124.9, 123.9, 123.5, 121.9, 121.7, 121.2, 116.7, 114.4, 53.9, 30.4, 26.1, 25.4; HRMS (ESI, m/z) calcd. For  $C_{22}H_{21}BrN_3O$   $[M+H]^+$ : 422.0868; found: 422.0886.

### 3-cyclohexyl-5-methoxy-1-(pyridin-2-yl)-1H-naphtho[1,2-d]imidazol-2(3H)-one (3s)

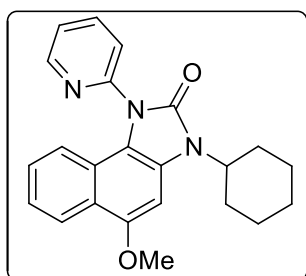

The general procedure 1 for imidazolone was followed. Column chromatography ( $SiO_2$ , eluting with 70:30 hexane/ethyl acetate) afforded the desired product as a brown solid (44.7 mg, 60% yield), mp 166-168 °C.

$^1H$  NMR (400 MHz,  $CDCl_3$ ):  $\delta$  8.64-8.62 (m, 1H), 8.27-8.25 (m, 1H), 7.95 (td,  $J_1 = 8.0$  Hz,  $J_2 = 2.0$  Hz, 1H), 7.70 (dt,  $J_1 = 8.0$  Hz,  $J_2 = 0.8$  Hz, 1H), 7.41-7.37 (m, 1H), 7.29-7.25 (m, 1H), 7.22-7.18 (m, 1H), 6.98-6.96 (m, 1H), 6.87 (s, 1H), 4.35-4.27 (m, 1H), 4.05 (s, 3H), 2.34-2.24 (m, 2H), 1.99-1.93 (m, 4H), 1.78 (d,  $J = 12.8$  Hz, 1H), 1.54-1.43 (m, 2H), 1.37-1.28 (m, 1H);  $^{13}C$  NMR (100 MHz,  $CDCl_3$ ):  $\delta$  153.9, 152.6, 150.3, 149.4, 138.6, 126.5, 126.1, 123.3, 123.21, 123.18, 122.8,



121.8, 121.3, 121.0, 115.4, 90.8, 56.3, 53.8, 30.4, 26.2, 25.6; HRMS (ESI, m/z) calcd. For  $C_{23}H_{24}N_3O_2$   $[M+H]^+$ : 374.1869; found: 374.1874.

**3-cyclohexyl-5-(furan-3-yl)-1-(pyridin-2-yl)-1H-naphtho[1,2-d]imidazol-2(3H)-one (3t)**

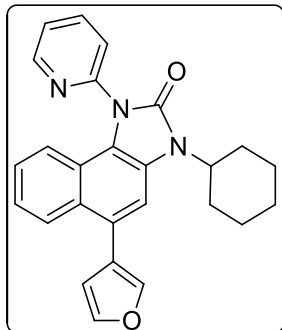

The general procedure 1 for imidazolone was followed. Column chromatography ( $SiO_2$ , eluting with 75:25 hexane/ethyl acetate) afforded the desired product as a light brown solid (65.4 mg, 80% yield), mp 190-192 °C.

$^1H$  NMR (400 MHz,  $CDCl_3$ ):  $\delta$  8.67-8.66 (m, 1H), 8.07-8.05 (m, 1H), 7.99 (td,  $J_1 = 8.0$  Hz,  $J_2 = 2.0$  Hz, 1H), 7.72 (dt,  $J_1 = 8.0$  Hz,  $J_2 = 0.8$  Hz, 1H), 7.65 (dd,  $J_1 = 1.6$  Hz,  $J_2 = 0.8$  Hz, 1H), 7.59 (t,  $J = 1.6$  Hz, 1H), 7.47-7.43 (m, 2H), 7.29-7.25 (m, 1H), 7.21-7.17 (m, 1H), 7.04-7.01 (m, 1H), 6.68 (dd,  $J_1 = 2.0$  Hz,  $J_2 = 0.8$  Hz, 1H), 4.40-4.32 (m, 1H), 2.33-2.22 (m, 2H), 1.99-1.91 (m, 4H), 1.76 (d,  $J = 12.8$  Hz, 1H), 1.53-1.42 (m, 2H), 1.36-1.28 (m, 1H);  $^{13}C$  NMR (100 MHz,  $CDCl_3$ ):  $\delta$  153.8, 150.2, 149.5, 143.0, 140.6, 138.9, 128.5, 127.0, 126.3, 125.8, 125.7, 123.8, 123.7, 123.4, 121.7, 121.6, 120.7, 113.0, 111.4, 53.8, 30.4, 26.1, 25.4; HRMS (ESI, m/z) calcd. For  $C_{26}H_{24}N_3O$   $[M+H]^+$ : 410.1869; found: 410.1870.

**3-cyclohexyl-5-(1H-pyrazol-1-yl)-1-(pyridin-2-yl)-1H-naphtho[1,2-d]imidazol-2(3H)-one (3u)**

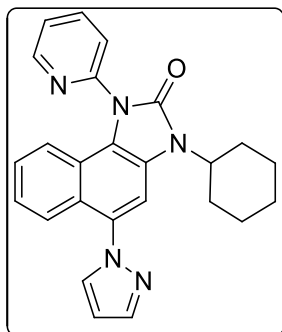

The general procedure 1 for imidazolone was followed. Column chromatography ( $SiO_2$ , eluting with 70:30 hexane/ethyl acetate) afforded the desired product as a creamy white solid (79.3 mg, 97% yield), mp 192-194 °C.

$^1\text{H}$  NMR (400 MHz,  $\text{CDCl}_3$ ):  $\delta$  8.68-8.66 (m, 1H), 8.01 (td,  $J_1 = 7.6$  Hz,  $J_2 = 2.0$  Hz, 1H), 7.85-7.84 (m, 1H), 7.76 (dd,  $J_1 = 2.4$  Hz,  $J_2 = 0.8$  Hz, 1H), 7.73 (dt,  $J_1 = 8.0$  Hz,  $J_2 = 0.8$  Hz, 1H), 7.62 (s, 1H), 7.54-7.51 (m, 1H), 7.48-7.45 (m, 1H), 7.30-7.25 (m, 1H), 7.23-7.19 (m, 1H), 7.05-7.02 (m, 1H), 6.56 (t,  $J = 2.0$  Hz, 1H), 4.37-4.29 (m, 1H), 2.31-2.21 (m, 2H), 1.97-1.89 (m, 4H), 1.73 (d,  $J = 12.8$  Hz, 1H), 1.49-1.39 (m, 2H), 1.33-1.25 (m, 1H);  $^{13}\text{C}$  NMR (100 MHz,  $\text{CDCl}_3$ ):  $\delta$  153.8, 149.9, 149.7, 140.9, 139.0, 133.0, 132.6, 126.4, 126.1, 125.2, 124.9, 124.0, 123.96, 123.5, 122.5, 121.6, 120.5, 108.95, 106.7, 54.1, 30.3, 26.1, 25.3; HRMS (EI, m/z) calcd. For  $\text{C}_{25}\text{H}_{24}\text{N}_5\text{O}$   $[\text{M}+\text{H}]^+$ : 410.1981; found: 410.1985.

### 3-cyclohexyl-5-fluoro-1-(pyridin-2-yl)-1H-naphtho[1,2-d]imidazol-2(3H)-one (3v)

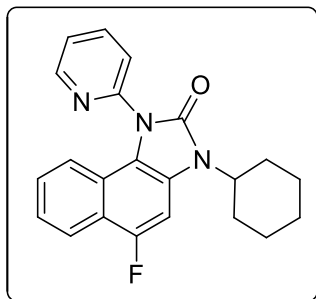

The general procedure 1 for imidazolone was followed. Column chromatography ( $\text{SiO}_2$ , eluting with 75:25 hexane/ethyl acetate) afforded the desired product as a light brown crystalline solid (47 mg, 65% yield), mp 142-144  $^\circ\text{C}$ .

$^1\text{H}$  NMR (400 MHz,  $\text{CDCl}_3$ ): 8.65-8.64 (m, 1H), 8.08 (d,  $J = 8.0$  Hz, 1H), 7.98 (td,  $J_1 = 7.6$  Hz,  $J_2 = 1.6$  Hz, 1H), 7.71 (dt,  $J_1 = 8.0$  Hz,  $J_2 = 0.8$  Hz, 1H), 7.45-7.42 (m, 1H), 7.35-7.21 (m, 3H), 7.00-6.98 (m, 1H), 4.38-4.29 (m, 1H), 2.27-2.17 (m, 2H), 1.97-1.93 (m, 4H), 1.78 (d,  $J = 12.8$  Hz, 1H), 1.53-1.41 (m, 2H), 1.36-1.29 (m, 1H);  $^{13}\text{C}$  NMR (100 MHz,  $\text{CDCl}_3$ ):  $\delta$  155.5 (d,  $J = 244.7$  Hz), 153.9, 150.0, 149.5, 138.9, 126.8, 125.2 (d,  $J = 12.5$  Hz), 123.7, 123.69, 123.3, 121.7 (d,  $J = 6.3$  Hz), 121.2 (d,  $J = 2.7$  Hz), 120.8 (d,  $J = 4.8$  Hz), 119.5 (d,  $J = 16.8$  Hz), 117.9, 96.1 (d,  $J = 27.7$  Hz), 53.9, 30.3, 26.1, 25.4;  $^{19}\text{F}$  NMR (376 MHz,  $\text{CDCl}_3$ ):  $\delta$  -127.04 (s, 1F); HRMS (ESI, m/z) calcd. For  $\text{C}_{22}\text{H}_{21}\text{FN}_3\text{O}_3$   $[\text{M}+\text{H}]^+$ : 362.1669; found: 362.1667.

### 3-cyclohexyl-5-methyl-1-(pyridin-2-yl)-1H-naphtho[1,2-d]imidazol-2(3H)-one (3w)

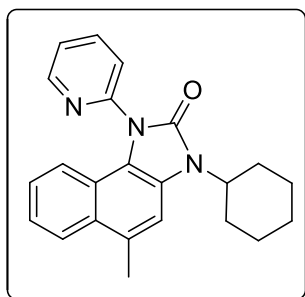

The general procedure 1 for imidazolone was followed. Column chromatography (SiO<sub>2</sub>, eluting with 75:25 hexane/ethyl acetate) afforded the desired product as a light brown solid (53.5 mg, 75% yield), mp 134-136 °C.

<sup>1</sup>H NMR (400 MHz, CDCl<sub>3</sub>): δ 8.66-8.64 (m, 1H), 7.99-7.94 (m, 2H), 7.69 (dt, *J*<sub>1</sub> = 8.0 Hz, *J*<sub>2</sub> = 0.4 Hz, 1H), 7.43-7.40 (m, 1H), 7.37 (s, 1H), 7.34-7.30 (m, 1H), 7.21-7.16 (m, 1H), 7.02 (d, *J* = 8.4 Hz, 1H), 4.40-4.32 (m, 1H), 2.76 (s, 3H), 2.34-2.24 (m, 2H), 1.98-1.92 (m, 4H), 1.78 (d, *J* = 12.4 Hz, 1H), 1.53-1.43 (m, 2H), 1.39-1.31 (m, 1H), 1.25 (grease); <sup>13</sup>C NMR (100 MHz, CDCl<sub>3</sub>): δ 153.8, 150.4, 149.5, 138.8, 129.6, 128.8, 125.7, 125.5, 125.3, 123.5, 123.39, 123.36, 121.8, 120.7, 120.5, 111.3, 53.7, 30.4, 26.2, 25.5, 20.3; HRMS (ESI, m/z) calcd. For C<sub>23</sub>H<sub>24</sub>N<sub>3</sub>O [M+H]<sup>+</sup>: 358.1919; found: 358.1920.

### 3-cyclohexyl-9-methyl-1-(pyridin-2-yl)-1H-naphtho[1,2-d]imidazol-2(3H)-one (3x)

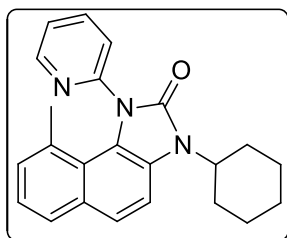

The general procedure 1 for imidazolone was followed. Column chromatography (SiO<sub>2</sub>, eluting with 75:25 hexane/ethyl acetate) afforded the desired product as a light brown solid (67.8 mg, 95 % yield), mp 164-166 °C.

<sup>1</sup>H NMR (400 MHz, CDCl<sub>3</sub>): δ 8.33-8.31 (m, 1H), 7.87 (td, *J*<sub>1</sub> = 8.0 Hz, *J*<sub>2</sub> = 2.0 Hz, 1H), 7.78 (d, *J* = 8.0 Hz, 1H), 7.69-7.66 (m, 2H), 7.45 (d, *J* = 8.8 Hz, 1H), 7.25-7.20 (m, 2H), 7.08 (d, *J* = 7.2 Hz, 1H), 4.38-4.30 (m, 1H), 2.34-2.23 (m, 2H), 1.94 (d, *J* = 11.2 Hz, 4H), 1.77-1.74 (m, 4H), 1.51-1.41 (m, 2H), 1.36-1.28 (m, 1H); <sup>13</sup>C NMR (100 MHz, CDCl<sub>3</sub>): δ 155.1, 153.3, 148.3, 138.2, 131.1, 131.0, 129.0, 128.5, 127.1, 125.3, 123.5, 123.2, 122.2, 122.1, 121.6, 109.7, 53.9, 30.2, 26.2, 25.5, 21.7; HRMS (ESI, m/z) calcd. For C<sub>23</sub>H<sub>24</sub>N<sub>3</sub>O [M+H]<sup>+</sup>: 358.1919; found: 358.1925.

### 3-cyclohexyl-1-(pyridin-2-yl)-5-tosyl-1H-naphtho[1,2-d]imidazol-2(3H)-one (3y)

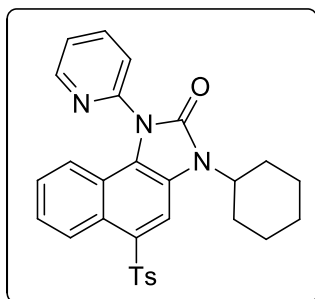

The general procedure 1 for imidazolone was followed. Column chromatography (SiO<sub>2</sub>, eluting with 70:30 hexane/ethyl acetate) afforded the desired product as a light brown powder (63.6 mg, 64% yield), mp 172-174 °C.

<sup>1</sup>H NMR (400 MHz, CDCl<sub>3</sub>): 8.63-8.62 (m, 1H), 8.60 (s, 1H), 8.58 (dt, *J*<sub>1</sub> = 8.8 Hz, *J*<sub>2</sub> = 0.8 Hz, 1H), 8.01 (td, *J*<sub>1</sub> = 7.6 Hz, *J*<sub>2</sub> = 1.6 Hz, 1H), 7.81-7.78 (m, 2H), 7.69 (dt, *J*<sub>1</sub> = 8.0 Hz, *J*<sub>2</sub> = 0.8 Hz, 1H), 7.49-7.46 (m, 1H), 7.35-7.31 (m, 1H), 7.25-7.23 (m, 2H), 7.19-7.14 (m, 1H), 7.00-6.97 (m, 1H), 4.45-4.37 (m, 1H), 2.39-2.28 (m, 5H), 2.00-1.96 (m, 4H), 1.79 (d, *J* = 12.4 Hz, 1H), 1.57-1.46 (m, 2H), 1.42-1.34 (m, 1H); <sup>13</sup>C NMR (100 MHz, CDCl<sub>3</sub>): δ 153.6, 149.8, 149.4, 144.0, 139.2, 130.1, 129.8, 127.3, 127.1, 126.3, 125.8, 125.7, 125.4, 124.4, 123.7, 122.2, 120.6, 114.2, 54.4, 30.4, 25.2, 21.6; HRMS (ESI, m/z) calcd. For C<sub>29</sub>H<sub>28</sub>N<sub>3</sub>O<sub>3</sub>S [M+H]<sup>+</sup>: 498.1851; found: 498.1853.

### 3-cyclohexyl-1-(pyridin-2-yl)-1H-imidazo[4,5-f]quinolin-2(3H)-one (3z)

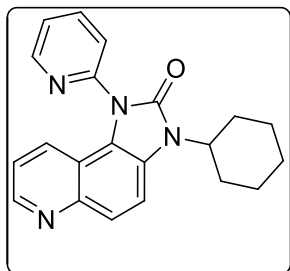

The general procedure 1 for imidazolone was followed. Column chromatography (SiO<sub>2</sub>, eluting with 65:35 hexane/ethyl acetate) afforded the desired product as a creamy white powder (62 mg, 90% yield), mp 144-146 °C.

<sup>1</sup>H NMR (400 MHz, CDCl<sub>3</sub>): δ 8.73 (d, *J* = 3.6 Hz, 1H), 8.64-8.62 (m, 1H), 8.01-7.93 (m, 2H), 7.74-7.72 (m, 2H), 7.45-7.41 (m, 2H), 7.11-7.08 (m, 1H), 4.42-4.34 (m, 1H), 2.32-2.21 (m, 2H), 1.97-1.92 (m, 4H), 1.77 (d, *J* = 12.8 Hz, 1H), 1.52-1.41 (m, 2H), 1.36-1.28 (m, 1H); <sup>13</sup>C NMR (100 MHz, CDCl<sub>3</sub>): δ 153.7, 149.7, 149.5, 148.8, 144.6, 139.0, 129.7, 126.2, 124.6, 123.9, 123.2, 121.1, 120.2, 115.9, 113.5, 53.9, 36.4, 26.1, 25.4; HRMS (ESI, m/z) calcd. For C<sub>21</sub>H<sub>20</sub>N<sub>4</sub>ONa [M+Na]<sup>+</sup>: 367.1535; found: 367.1551.

### 3-cyclohexyl-1-(pyridin-2-yl)-1H-imidazo[4,5-f]isoquinolin-2(3H)-one (3aa)

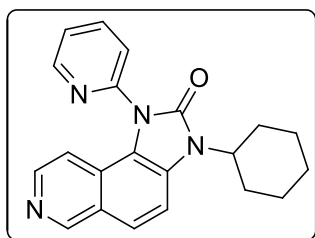

The general procedure 1 for imidazolone was followed. Column chromatography (SiO<sub>2</sub>, eluting with 65:35 hexane/ethyl acetate) afforded the desired product as a creamy white powder (56.4 mg, 82% yield), mp 160-162 °C.

<sup>1</sup>H NMR (400 MHz, CDCl<sub>3</sub>): δ 9.20 (s, 1H), 8.68-8.66 (m, 1H), 8.20 (d, *J* = 5.6 Hz, 1H), 8.01 (td, *J*<sub>1</sub> = 8.0 Hz, *J*<sub>2</sub> = 2.0 Hz, 1H), 7.82 (d, *J* = 8.8 Hz, 1H), 7.74 (d, *J* = 7.6 Hz, 1H), 7.65 (d, *J* = 8.8 Hz, 1H), 7.49-7.46 (m, 1H), 6.84 (d, *J* = 6.0 Hz, 1H), 4.44-4.36 (m, 1H), 2.32-2.23 (m, 2H), 1.96 (d, *J* = 11.6 Hz, 4H), 1.79 (d, *J* = 12.8 Hz, 1H), 1.53-1.43 (m, 2H), 1.37-1.29 (m, 1H); <sup>13</sup>C NMR (100 MHz, CDCl<sub>3</sub>): δ 153.5, 152.8, 149.5, 149.3, 141.6, 139.0, 129.8, 124.0, 123.8, 123.2, 122.8, 120.5, 114.8, 111.8, 54.1, 30.4, 26.1, 25.4; HRMS (ESI, *m/z*) calcd. For C<sub>21</sub>H<sub>21</sub>N<sub>4</sub>O [M+H]<sup>+</sup>: 345.1715; found: 345.1721.

### 3-cyclopentyl-5-phenyl-1-(pyridin-2-yl)-1H-naphtho[1,2-d]imidazol-2(3H)-one (3ab)

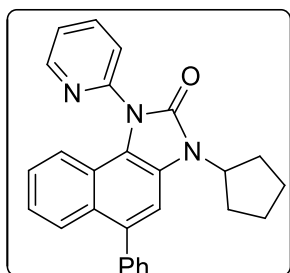

The general procedure 1 for imidazolone was followed. Column chromatography (SiO<sub>2</sub>, eluting with 75:25 hexane/ethyl acetate) afforded the desired product as a creamy white powder (45.4 mg, 56% yield), mp 142-144 °C.

<sup>1</sup>H NMR (400 MHz, CDCl<sub>3</sub>): δ 8.68-8.67 (m, 1H), 8.01 (td, *J*<sub>1</sub> = 8.0 Hz, *J*<sub>2</sub> = 2.0 Hz, 1H), 7.85-7.83 (m, 1H), 7.75 (dt, *J*<sub>1</sub> = 8.0 Hz, *J*<sub>2</sub> = 0.8 Hz, 1H), 7.53-7.42 (m, 6H), 7.36 (s, 1H), 7.24-7.16 (m, 2H), 7.07-7.03 (m, 1H), 4.94 (quintet, *J* = 8.8 Hz, 1H), 2.31-2.22 (m, 2H), 2.13-2.06 (m, 2H), 2.01-1.92 (m, 2H), 1.76-1.70 (m, 2H); <sup>13</sup>C NMR: (100 MHz, CDCl<sub>3</sub>): δ 154.0, 150.2, 149.6, 141.1, 138.9, 136.1, 130.4, 128.4, 128.3, 127.5, 127.4, 125.7, 125.5, 123.7, 123.6, 123.4, 121.5, 120.7, 111.1, 54.1, 29.3, 25.1; HRMS (ESI, *m/z*) calcd. For C<sub>27</sub>H<sub>24</sub>N<sub>3</sub>O [M+H]<sup>+</sup>: 406.1919; found: 406.1917.

### 3-cyclohexyl-1-(3-methylpyridin-2-yl)-1H-naphtho[1,2-d]imidazol-2(3H)-one (3ac)

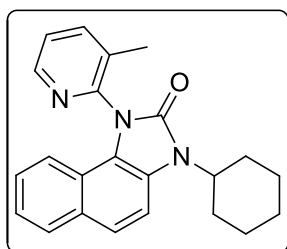

The general procedure 1 for imidazolone was followed. Column chromatography (SiO<sub>2</sub>, eluting with 75:25 hexane/ethyl acetate) afforded the desired product as a light brown crystalline solid (54.3 mg, 76% yield), mp 192-194 °C.

<sup>1</sup>H NMR (400 MHz, CDCl<sub>3</sub>): δ 8.52 (s, 1H), 7.83-7.80 (m, 2H), 7.62 (d, *J* = 8.8 Hz, 1H), 7.54 (d, *J* = 8.4 Hz, 1H), 7.42 (dd, *J*<sub>1</sub> = 7.6 Hz, *J*<sub>2</sub> = 4.8 Hz, 1H), 7.26-7.22 (m, 1H), 7.13-7.09 (m, 1H), 6.63 (d, *J* = 8.8 Hz, 1H), 4.45-4.37 (m, 1H), 2.30-2.23 (m, 5H), 1.99-1.92 (m, 4H), 1.77 (d, *J* = 12.8 Hz, 1H), 1.53-1.44 (m, 2H), 1.37-1.29 (m, 1H); <sup>13</sup>C NMR (100 MHz, CDCl<sub>3</sub>): δ 153.0, 149.3, 147.6, 140.4, 133.4, 129.7, 129.1, 126.1, 125.8, 124.8, 123.5, 122.6, 122.1, 120.3, 119.9, 110.6, 53.6, 30.6, 30.5, 26.1, 25.5, 17.5; HRMS (ESI, *m/z*) calcd. For C<sub>23</sub>H<sub>24</sub>N<sub>3</sub>O [M+H]<sup>+</sup>: 358.1919; found: 358.1921.

### 3-cyclohexyl-1-(5-methylpyrazin-2-yl)-1H-naphtho[1,2-d]imidazol-2(3H)-one (3ad)

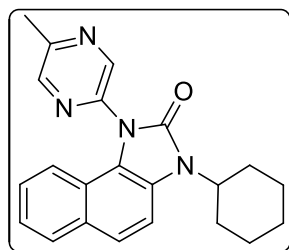

The general procedure 1 for imidazolone was followed. Column chromatography (SiO<sub>2</sub>, eluting with 70:30 hexane/ethyl acetate) afforded the desired product as a light brown solid (40.8 mg, 57% yield), mp 134-136 °C.

<sup>1</sup>H NMR (400 MHz, CDCl<sub>3</sub>): 8.89 (d, *J* = 0.8 Hz, 1H), 8.50 (s, 1H), 7.84 (d, *J* = 8.0 Hz, 1H), 7.67 (d, *J* = 8.8 Hz, 1H), 7.52 (d, *J* = 8.8 Hz, 1H), 7.32-7.28 (m, 1H), 7.24-7.19 (m, 1H), 6.98 (dd, *J*<sub>1</sub> = 8.8 Hz, *J*<sub>2</sub> = 0.8 Hz, 1H), 4.43-4.34 (m, 1H), 2.72 (s, 3H), 2.32-2.21 (m, 2H), 1.98-1.93 (m, 4H), 1.78 (d, *J* = 12.4 Hz, 1H), 1.54-1.42 (m, 2H), 1.36-1.29 (m, 1H); <sup>13</sup>C NMR (100 MHz, CDCl<sub>3</sub>): δ 153.6, 153.5, 144.4, 143.4, 143.3, 129.9, 129.4, 126.4, 126.1, 123.72, 123.69, 121.5, 121.1, 120.3, 110.5, 53.9, 30.4, 26.1, 25.5, 21.4; HRMS (ESI, *m/z*) calcd. For C<sub>22</sub>H<sub>23</sub>N<sub>3</sub>O [M+H]<sup>+</sup>: 359.1872; found: 359.1887.

### 3-cyclohexyl-1-(quinolin-2-yl)-1H-naphtho[1,2-d]imidazol-2(3H)-one (3ae)

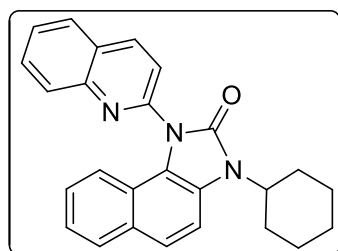

The general procedure 1 for imidazolone was followed. Column chromatography (SiO<sub>2</sub>, eluting with 75:25 hexane/ethyl acetate) afforded the desired product as a creamy white powder (57.4 mg, 73% yield), mp 188-190 °C.

<sup>1</sup>H NMR (400 MHz, CDCl<sub>3</sub>): δ 8.42 (d, *J* = 8.4 Hz, 1H), 8.05-8.02 (m, 1H), 7.97 (dd, *J*<sub>1</sub> = 8.0 Hz, *J*<sub>2</sub> = 0.8 Hz, 1H), 7.84-7.82 (m, 2H), 7.77-7.73 (m, 1H), 7.64-7.62 (m, 2H), 7.54 (d, *J* = 8.8 Hz, 1H), 7.28-7.24 (m, 1H), 7.08-7.07 (m, 2H), 4.46-4.38 (m, 1H), 2.35-2.25 (m, 2H), 2.01-1.93 (m, 4H), 1.78 (d, *J* = 13.2 Hz, 1H), 1.54-1.44 (m, 2H), 1.38-1.30 (m, 1H); <sup>13</sup>C NMR (100 MHz, CDCl<sub>3</sub>): δ 153.8, 149.6, 147.3, 138.9, 130.3, 130.0, 129.3, 129.1, 127.8, 127.6, 127.4, 126.3, 125.7, 123.5, 121.73, 121.68, 121.2, 120.7, 110.4, 53.7, 30.4, 26.2, 25.5; HRMS (ESI, *m/z*) calcd. For C<sub>26</sub>H<sub>24</sub>N<sub>3</sub>O [M+H]<sup>+</sup>: 394.1919; found: 394.1920.

### 3-butyl-1-(pyrazin-2-yl)-1H-naphtho[1,2-d]imidazol-2(3H)-one (3af)

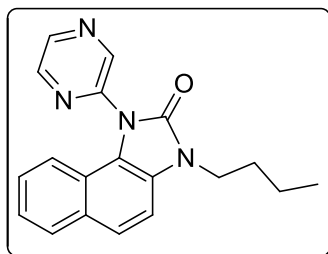

The general procedure 1 for imidazolone was followed. Column chromatography (SiO<sub>2</sub>, eluting with 70:30 hexane/ethyl acetate) afforded the desired product as a light brown crystalline solid (41.3 mg, 65% yield), mp 140-142 °C.

<sup>1</sup>H NMR (400 MHz, CDCl<sub>3</sub>): δ 9.07 (s, 1H), 8.69-8.63 (m, 2H), 7.86 (d, *J* = 8.0 Hz, 1H), 7.73 (d, *J* = 8.8 Hz, 1H), 7.36-7.30 (m, 2H), 7.27-7.23 (m, 1H), 7.04 (d, *J* = 8.4 Hz, 1H), 4.03 (t, *J* = 7.2 Hz, 2H), 1.86-1.79 (m, 2H), 1.50-1.41 (m, 2H), 0.97 (t, *J* = 7.6 Hz, 3H); <sup>13</sup>C NMR (100 MHz, CDCl<sub>3</sub>): δ 153.9, 146.9, 144.4, 143.7, 143.4, 130.4, 129.6, 127.2, 126.2, 124.6, 123.8, 121.3, 121.0, 120.4, 109.2, 41.5, 30.7, 20.2, 13.8; HRMS (ESI, *m/z*) calcd. For C<sub>19</sub>H<sub>18</sub>N<sub>4</sub>O [M+H]<sup>+</sup>: 319.1559; found: 319.1558.

### 3-(tert-butyl)-1-(pyrazin-2-yl)-1H-naphtho[1,2-d]imidazol-2(3H)-one (3ag)

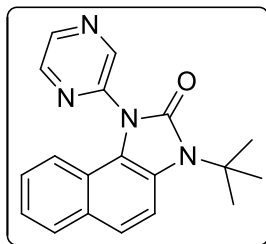

The general procedure 1 for imidazolone was followed. Column chromatography (SiO<sub>2</sub>, eluting with 70:30 hexane/ethyl acetate) afforded the desired product as a creamy white powder (62.3 mg, 98% yield), mp 148-150 °C.

<sup>1</sup>H NMR (400 MHz, CDCl<sub>3</sub>): δ 9.00 (d, *J* = 1.6 Hz, 1H), 8.68 (d, *J* = 2.4 Hz, 1H), 8.63 (dd, *J*<sub>1</sub> = 2.4 Hz, *J*<sub>2</sub> = 1.2 Hz, 1H), 7.82 (d, *J* = 8.4 Hz, 1H), 7.76 (d, *J* = 9.2 Hz, 1H), 7.63 (d, *J* = 9.2 Hz, 1H), 7.32-7.28 (m, 1H), 7.21-7.16 (m, 1H), 6.85 (d, *J* = 8.4 Hz, 1H), 1.88 (s, 9H); <sup>13</sup>C NMR (100 MHz, CDCl<sub>3</sub>): δ 153.8, 147.2, 145.1, 143.8, 143.6, 129.7, 129.1, 127.2, 126.0, 123.9, 123.2, 121.9, 121.3, 119.9, 113.1, 59.1, 29.8; HRMS (ESI, *m/z*) calcd. For C<sub>19</sub>H<sub>19</sub>N<sub>4</sub>O [M+H]<sup>+</sup>: 319.1559; found: 319.1563.

### 3-cyclohexyl-1-(isoquinolin-1-yl)-1H-naphtho[1,2-d]imidazol-2(3H)-one (3ah)

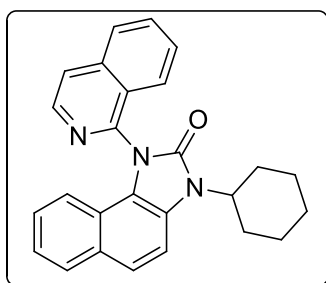

The general procedure 1 for imidazolone was followed. Column chromatography (SiO<sub>2</sub>, eluting with 70:30 hexane/ethyl acetate) afforded the desired product as a white powder (23.6 mg, 30% yield), mp 184-186 °C.

<sup>1</sup>H NMR (400 MHz, CDCl<sub>3</sub>): δ 8.60 (d, *J* = 5.6 Hz, 1H), 8.00 (d, *J* = 8.4 Hz, 1H), 7.94 (d, *J* = 8.8 Hz, 1H), 7.91 (d, *J* = 6.0 Hz, 1H), 7.82-7.56 (m, 2H), 7.67 (d, *J* = 8.8 Hz, 1H), 7.61-7.57 (m, 2H), 7.22-7.18 (m, 1H), 6.99-6.95 (m, 1H), 6.44 (d, *J* = 8.4 Hz, 1H), 4.99-4.41 (m, 1H), 2.37-2.27 (m, 2H), 2.07-1.95 (m, 4H), 1.79 (d, *J* = 11.6 Hz, 1H), 1.56-1.44 (m, 2H), 1.39-1.31 (m, 1H); <sup>13</sup>C NMR (100 MHz, CDCl<sub>3</sub>): δ 153.8, 141.7, 138.5, 131.5, 129.8, 129.1, 128.9, 127.1, 126.7, 126.1, 125.6, 123.5, 123.1, 122.8, 120.4, 120.1, 110.6, 53.7, 30.7, 26.2, 25.5; HRMS (ESI, *m/z*) calcd. For C<sub>26</sub>H<sub>24</sub>N<sub>3</sub>O [M+H]<sup>+</sup>: 394.1919; found: 394.1920.

### *N*-(2-(cyclohexylamino)naphthalen-1-yl)isoquinoline-1-carboxamide (3ah')

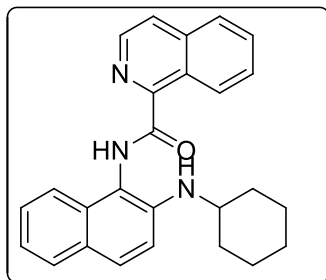



The general procedure 1 for imidazolone was followed. Column chromatography (SiO<sub>2</sub>, eluting with 85:15 hexane/ethyl acetate) afforded the desired product as a yellow fluffy solid (32.4 mg, 41% yield), mp 134-136 °C.

<sup>1</sup>H NMR (400 MHz, CDCl<sub>3</sub>): δ 9.96 (s, 1H), 9.67-9.64 (m, 1H), 8.62 (d, *J* = 5.6 Hz, 1H), 7.92-7.90 (m, 2H), 7.81 (d, *J* = 8.4 Hz, 1H), 7.78- 7.69 (m, 4H), 7.43-7.39 (m, 1H), 7.28-7.21 (m, 2H), 3.52-3.46 (m, 1H), 2.12-2.09 (m, 2H), 1.79-1.74 (m, 2H), 1.64-1.60 (m, 1H), 1.42-1.19 (m, 5H); <sup>13</sup>C NMR (100 MHz, CDCl<sub>3</sub>): δ 165.2, 160.5, 154.8, 147.9, 140.5, 131.6, 130.8, 129.1, 128.3, 128.0, 127.4, 127.1, 127.0, 125.0, 122.3, 120.8, 110.9, 33.6, 25.9, 25.0; HRMS (ESI, *m/z*) calcd. For C<sub>26</sub>H<sub>26</sub>N<sub>3</sub>O [M+H]<sup>+</sup>: 396.2076; found: 396.2078.

### ***N*-(5-(cyclohexylamino)quinolin-6-yl)picolinamide (3ai)**

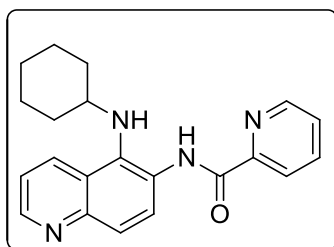

The general procedure 1 for imidazolone was followed. Column chromatography (SiO<sub>2</sub>, eluting with 80:20 hexane/ethyl acetate) afforded the desired product as a pale yellow solid (42.2 mg, 61% yield), mp 146-148 °C.

<sup>1</sup>H NMR (400 MHz, CDCl<sub>3</sub>): δ 10.98 (s, 1H), 8.87 (d, *J* = 9.2 Hz, 1H), 8.81 (dd, *J*<sub>1</sub> = 4.0 Hz, *J*<sub>2</sub> = 1.6 Hz, 1H), 8.67-8.65 (m, 1H), 8.33 (dt, *J*<sub>1</sub> = 7.6 Hz, *J*<sub>2</sub> = 1.2 Hz, 1H), 8.29-8.27 (m, 1H), 7.94-7.89 (m, 2H), 7.49-7.46 (m, 1H), 7.37 (dd, *J*<sub>1</sub> = 8.4 Hz, *J*<sub>2</sub> = 4.0 Hz, 1H), 3.35 (s, 1H), 3.02-2.95 (m, 1H), 2.06-2.02 (m, 2H), 1.73-1.68 (m, 2H), 1.59-1.55 (m, 1H), 1.39-1.30 (m, 2H), 1.67-1.08 (m, 3H); <sup>13</sup>C NMR (100 MHz, CDCl<sub>3</sub>): δ 162.3, 150.4, 148.9, 148.2, 146.2, 137.7, 131.6, 131.0, 130.6, 126.5, 125.9, 125.5, 123.6, 122.6, 120.8, 58.6, 34.8, 25.9, 25.4; HRMS (ESI, *m/z*) calcd. For C<sub>21</sub>H<sub>23</sub>N<sub>4</sub>O<sub>3</sub> [M+H]<sup>+</sup>: 347.1872; found: 347.1889.

### **3-methyl-2-(pyridin-2-yl)-3H-naphtho[1,2-d]imidazole (3aj)**

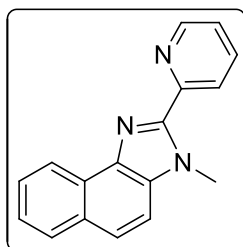

The general procedure 1 for imidazolone was followed. Column chromatography (SiO<sub>2</sub>, eluting with 90:10 hexane/ethyl acetate) afforded the desired product as a colorless crystalline solid (26 mg, 50% yield), mp 108-110 °C.

<sup>1</sup>H NMR (400 MHz, CDCl<sub>3</sub>): δ 8.74 (d, *J* = 8.0 Hz, 1H), 8.70-8.68 (m, 1H), 8.51 (d, *J* = 8.0 Hz, 1H), 7.93 (d, *J* = 8.0 Hz, 1H), 7.85 (td, *J*<sub>1</sub> = 7.6 Hz, *J*<sub>2</sub> = 1.2 Hz, 1H), 7.74 (d, *J* = 8.8 Hz, 1H), 7.66-7.62 (m, 1H), 7.56-7.48 (m, 2H), 7.33-7.30 (m, 1H), 4.36 (s, 3H); <sup>13</sup>C NMR (100 MHz, CDCl<sub>3</sub>): δ 150.9, 148.7, 148.3, 138.2, 136.9, 133.6, 130.6, 128.6, 127.2, 126.7, 124.8, 124.73, 124.67, 123.4, 122.1, 110.5, 33.1; HRMS (ESI, *m/z*) calcd. For C<sub>17</sub>H<sub>14</sub>N<sub>3</sub> [M+H]<sup>+</sup>: 260.1188; found: 260.1196.

### 1-cyclohexyl-4-phenyl-3-(pyridin-2-yl)-1H-benzo[d]imidazol-2(3H)-one (3ak)

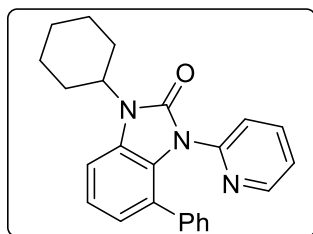

The general procedure 2 for imidazolone was followed. Column chromatography (SiO<sub>2</sub>, eluting with 80:20 hexane/ethyl acetate) afforded the desired product as a white solid (29.5 mg, 40% yield), mp 196-198 °C.

<sup>1</sup>H NMR (400 MHz, CDCl<sub>3</sub>): δ 7.87-7.85 (m, 1H), 7.54 (td, *J*<sub>1</sub> = 8.0 Hz, *J*<sub>2</sub> = 2.0 Hz, 1H), 7.32 (d, *J* = 8.0 Hz, 1H), 7.25-7.17 (m, 2H), 7.06-6.89 (m, 7H), 4.38-4.29 (m, 1H), 2.32-2.22 (m, 2H), 1.94 (d, *J* = 10.8 Hz, 4H), 1.76 (d, *J* = 12.8 Hz, 1H), 1.51-1.42 (m, 2H), 1.35-1.25 (m, 1H); <sup>13</sup>C NMR (100 MHz, CDCl<sub>3</sub>): δ 153.5, 148.5, 148.1, 138.7, 137.3, 130.2, 128.3, 127.6, 126.4, 126.1, 125.7, 123.8, 122.2, 122.0, 121.9, 108.3, 53.6, 29.9, 26.1, 25.5; HRMS (ESI, *m/z*) calcd. For C<sub>24</sub>H<sub>24</sub>N<sub>3</sub>O [M+H]<sup>+</sup>: 370.1919; found: 370.1913.

### 1-(tert-butyl)-4-phenyl-3-(pyridin-2-yl)-1H-benzo[d]imidazol-2(3H)-one (3al)

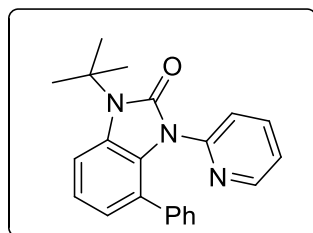

The general procedure 2 for imidazolone was followed was followed. Column chromatography (SiO<sub>2</sub>, eluting with 80:20 hexane/ethyl acetate) afforded the desired product as a white solid (20.5 mg, 30% yield), mp 228-230 °C.

$^1\text{H}$  NMR (400 MHz,  $\text{CDCl}_3$ ):  $\delta$  7.93 (d,  $J = 3.6$  Hz, 1H), 7.51-7.46 (m, 2H), 7.23 (d,  $J = 7.6$  Hz, 1H), 7.14 (t,  $J = 8.0$  Hz, 1H), 7.03-6.89 (m, 7H), 1.86 (s, 9H);  $^{13}\text{C}$  NMR (100 MHz,  $\text{CDCl}_3$ ):  $\delta$  153.8, 148.6, 148.1, 138.8, 137.2, 130.9, 128.4, 127.6, 126.3, 126.2, 125.6, 123.8, 122.8, 121.9, 121.5, 111.2, 58.7, 29.6; HRMS (ESI,  $m/z$ ) calcd. For  $\text{C}_{22}\text{H}_{22}\text{N}_3\text{O}$   $[\text{M}+\text{H}]^+$ : 344.1763; found: 344.1752.

**1-cyclohexyl-4-isopropyl-3-(pyridin-2-yl)-1H-benzo[d]imidazol-2(3H)-one (3am)**

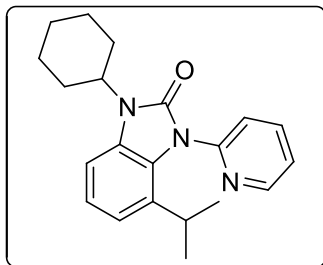

The general procedure 2 for imidazolone was followed. Column chromatography ( $\text{SiO}_2$ , eluting with 80:20 hexane/ethyl acetate) afforded the desired product as a creamy white solid (43.5 mg, 65% yield), mp 164-166  $^\circ\text{C}$ .

$^1\text{H}$  NMR (400 MHz,  $\text{CDCl}_3$ ):  $\delta$  8.58 (dd,  $J_1 = 4.8$  Hz,  $J_2 = 2.0$  Hz, 1H), 7.89 (td,  $J_1 = 7.6$  Hz,  $J_2 = 2.0$  Hz, 1H), 7.57 (d,  $J = 8.0$  Hz, 1H), 7.37-7.34 (m, 1H), 7.12-7.04 (m, 2H), 7.00-6.98 (m, 1H), 4.29-4.21 (m, 1H), 2.46-2.36 (m, 1H), 2.27-2.16 (m, 2H), 1.89 (d,  $J = 11.2$  Hz, 4H), 1.73 (d,  $J = 12.8$  Hz, 1H), 1.48-1.38 (m, 2H), 1.32-1.24 (m, 1H), 1.02 (d,  $J = 6.8$  Hz, 6H);  $^{13}\text{C}$  NMR (100 MHz,  $\text{CDCl}_3$ ):  $\delta$  153.9, 150.6, 149.0, 138.4, 132.4, 129.8, 126.1, 123.5, 123.4, 122.3, 119.0, 106.9, 53.5, 29.9, 27.7, 26.1, 25.5, 23.2; HRMS (ESI,  $m/z$ ) calcd. For  $\text{C}_{21}\text{H}_{26}\text{N}_3\text{O}$   $[\text{M}+\text{H}]^+$ : 336.2076; found: 336.2067.

**4-(tert-butyl)-1-cyclohexyl-3-(pyridin-2-yl)-1H-benzo[d]imidazol-2(3H)-one (3an)**

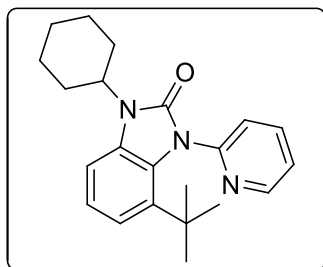

The general procedure 2 for imidazolone was followed. Column chromatography ( $\text{SiO}_2$ , eluting with 80:20 hexane/ethyl acetate) afforded the desired product as a creamy white solid (40 mg, 57% yield), mp 160-162  $^\circ\text{C}$ .

$^1\text{H}$  NMR (400 MHz,  $\text{CDCl}_3$ ):  $\delta$  8.49 (dd,  $J_1 = 4.8$  Hz,  $J_2 = 1.6$  Hz, 1H), 7.86 (td,  $J_1 = 7.6$  Hz,  $J_2 = 2.0$  Hz, 1H), 7.60 (d,  $J = 8.0$  Hz, 1H), 7.31-7.28 (m, 1H), 7.17 (dd,  $J_1 = 8.0$  Hz,  $J_2 = 1.6$  Hz, 1H), 7.12-7.04 (m, 2H), 4.22-4.14 (m, 1H), 2.29-2.18 (m, 2H), 1.91-1.85 (m, 4H), 1.72 (d,  $J = 12.8$  Hz, 1H), 1.46-1.35 (m, 2H), 1.30-1.22 (m, 1H), 1.07 (s, 9H);  $^{13}\text{C}$  NMR (100 MHz,  $\text{CDCl}_3$ ):  $\delta$  155.6, 153.8, 148.7, 138.1, 136.5, 132.2, 127.3, 124.5, 123.2, 122.6, 121.7, 107.1, 53.8, 34.9, 31.4, 29.7, 26.2, 25.5; HRMS (ESI,  $m/z$ ) calcd. For  $\text{C}_{22}\text{H}_{28}\text{N}_3\text{O}$   $[\text{M}+\text{H}]^+$ : 350.2232; found: 350.2225.

### 1-cyclohexyl-4-ethyl-3-(pyridin-2-yl)-1H-benzo[d]imidazol-2(3H)-one (3ao)

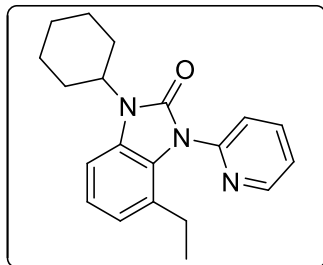

The general procedure 2 for imidazolone was followed was followed. Column chromatography ( $\text{SiO}_2$ , eluting with 90:10 hexane/ethyl acetate) afforded the desired product as a creamy white solid (16 mg, 25% yield).

$^1\text{H}$  NMR (400 MHz,  $\text{CDCl}_3$ ):  $\delta$  8.60-8.58 (m, 1H), 7.89 (td,  $J_1 = 7.6$  Hz,  $J_2 = 1.6$  Hz, 1H), 7.58 (dt,  $J_1 = 8.0$  Hz,  $J_2 = 0.8$  Hz, 1H), 7.37-7.34 (m, 1H), 7.09-7.04 (m, 2H), 6.89-6.88 (m, 1H), 4.30-4.22 (m, 1H), 2.26-2.19 (m, 4H), 1.89 (d,  $J = 9.6$  Hz, 4H), 1.73 (d,  $J = 12.8$  Hz, 1H), 1.48-1.38 (m, 2H), 1.32-1.24 (m, 1H), 0.89 (t,  $J = 7.2$  Hz, 3H);  $^{13}\text{C}$  NMR (100 MHz,  $\text{CDCl}_3$ ):  $\delta$  153.8, 150.0, 148.9, 138.3, 129.7, 127.4, 126.6, 123.6, 123.4, 122.4, 122.1, 107.2, 53.5, 29.9, 26.1, 25.5, 25.1, 14.2; HRMS (ESI,  $m/z$ ) calcd. For  $\text{C}_{20}\text{H}_{24}\text{N}_3\text{O}$   $[\text{M}+\text{H}]^+$ : 322.1919; found: 322.1913.

### *N*-(2-(cyclohexylamino)-3,5-dimethoxyphenyl)picolinamide (3ap)

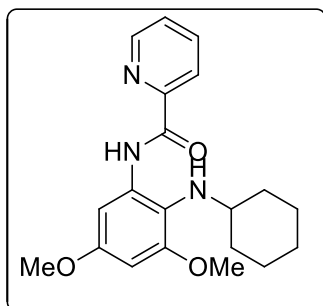

The general procedure for amination in aniline system was followed was followed. Column chromatography ( $\text{SiO}_2$ , eluting with 90:10 hexane/ethyl acetate) afforded the desired product as a gummy liquid (51 mg, 72% yield).

$^1\text{H}$  NMR (400 MHz,  $\text{CDCl}_3$ ):  $\delta$  11.04 (s, 1H), 8.62-8.60 (m, 1H), 8.25 (dt,  $J_1 = 8.0$  Hz,  $J_2 = 0.8$  Hz, 1H), 7.89 (d,  $J = 2.8$  Hz, 1H), 7.85 (td,  $J_1 = 8.0$  Hz,  $J_2 = 2.0$  Hz, 1H), 7.43-7.39 (m, 1H), 6.25 (d,  $J = 2.8$  Hz, 1H), 3.82 (s, 3H), 3.77 (s, 3H), 2.74-2.68 (m, 1H), 1.93 (d,  $J = 12.8$  Hz, 2H), 1.69-1.65 (m, 2H), 1.50 (s, 1H), 1.27-1.19 (m, 3H), 1.15-1.09 (m, 2H);  $^{13}\text{C}$  NMR (100 MHz,  $\text{CDCl}_3$ ):  $\delta$  162.0, 156.8, 154.9, 150.6, 148.3, 137.5, 134.8, 126.2, 122.3, 119.5, 95.9, 94.9, 57.8, 55.7, 55.6, 34.2, 26.1, 25.3; HRMS (ESI, m/z) calcd. For  $\text{C}_{20}\text{H}_{26}\text{N}_3\text{O}_3$   $[\text{M}+\text{H}]^+$ : 356.1974; found: 356.1973.

***N*-(2-(cyclohexylamino)-3,5-dimethylphenyl)picolinamide (3aq)**

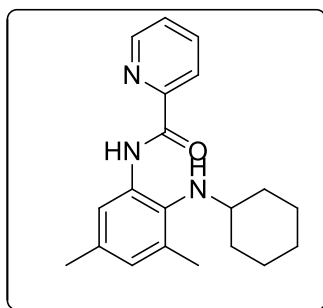

The general procedure for amination in aniline system was followed. Column chromatography ( $\text{SiO}_2$ , eluting with 95:5 hexane/ethyl acetate) afforded the desired product as a gummy liquid (33.5 mg, 52% yield).

$^1\text{H}$  NMR (400 MHz,  $\text{CDCl}_3$ ):  $\delta$  10.87 (s, 1H), 8.63-8.61 (m, 1H), 8.29 (dt,  $J_1 = 7.6$  Hz,  $J_2 = 1.2$  Hz, 1H), 8.23 (s, 1H), 7.88 (td,  $J_1 = 7.6$  Hz,  $J_2 = 1.6$  Hz, 1H), 7.45-7.42 (m, 1H), 6.75 (m, 1H), 2.84-2.77 (m, 1H), 2.31 (s, 3H), 2.26 (s, 3H), 2.06-2.03 (m, 2H), 1.71-1.68 (m, 2H), 1.55-1.54 (m, 1H), 1.32-1.25 (m, 2H), 1.13-1.08 (m, 3H);  $^{13}\text{C}$  NMR (100 MHz,  $\text{CDCl}_3$ ):  $\delta$  161.9, 150.8, 148.1, 137.5, 133.5, 133.2, 131.5, 126.6, 126.1, 122.4, 118.6, 58.0, 34.7, 25.9, 25.5, 21.3, 18.3; HRMS (ESI, m/z) calcd. For  $\text{C}_{20}\text{H}_{26}\text{N}_3\text{O}$   $[\text{M}+\text{H}]^+$ : 324.2076; found: 324.2066.

***N*-(2-(cyclopentylamino)-3,5-dimethoxyphenyl)picolinamide (3ar)**

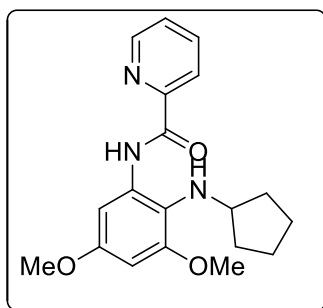

The general procedure for amination in aniline system was followed was followed. Column chromatography (SiO<sub>2</sub>, eluting with 90:10 hexane/ethyl acetate) afforded the desired product as a gummy liquid (34 mg, 50% yield).

<sup>1</sup>H NMR (400 MHz, CDCl<sub>3</sub>): δ 11.13 (s, 1H), 8.64-8.62 (m, 1H), 8.26 (dt, *J*<sub>1</sub> = 8.0 Hz, *J*<sub>2</sub> = 0.8 Hz, 1H), 7.92 (d, *J* = 2.4 Hz, 1H), 7.86 (td, *J*<sub>1</sub> = 7.6 Hz, *J*<sub>2</sub> = 1.6 Hz, 1H), 7.45-7.41 (m, 1H), 6.26 (d, *J* = 2.8 Hz, 1H), 3.84 (s, 3H), 3.79 (s, 3H), 3.47 (quintet, *J* = 5.6 Hz, 1H), 1.80-1.70 (m, 4H), 1.56-1.46 (m, 4H); <sup>13</sup>C NMR (100 MHz, CDCl<sub>3</sub>): δ 162.1, 157.1, 155.2, 150.6, 148.3, 137.5, 135.3, 126.2, 122.3, 119.9, 95.8, 95.0, 60.8, 55.6, 33.2, 23.6; HRMS (ESI, *m/z*) calcd. For C<sub>19</sub>H<sub>24</sub>N<sub>3</sub>O<sub>3</sub> [M+H]<sup>+</sup>: 342.1818; found: 342.1819.

### *N*-(2-(butylamino)-3,5-dimethoxyphenyl)picolinamide (3as)

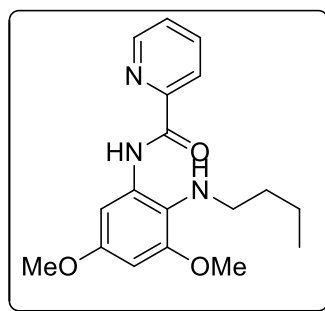

The general procedure for amination in aniline system was followed was followed. Column chromatography (SiO<sub>2</sub>, eluting with 90:10 hexane/ethyl acetate) afforded the desired product as a gummy liquid (31 mg, 47% yield).

<sup>1</sup>H NMR (400 MHz, CDCl<sub>3</sub>): δ 11.03 (s, 1H), 8.65-8.63 (m, 1H), 8.28-8.25 (m, 1H), 7.90-7.86 (m, 2H), 7.46-7.43 (m, 1H), 6.28 (d, *J* = 2.4 Hz, 1H), 3.84 (s, 3H), 3.81 (s, 3H), 2.85 (t, *J* = 7.2 Hz, 2H), 1.61 (quintet, *J* = 7.2 Hz, 2H), 1.49-1.39 (m, 2H), 0.89 (t, *J* = 7.2 Hz, 3H); <sup>13</sup>C NMR (100 MHz, CDCl<sub>3</sub>): δ 162.3, 157.1, 154.6, 150.5, 148.3, 137.5, 134.5, 126.3, 122.3, 96.2, 95.2, 55.8, 55.7, 49.8, 32.8, 20.3, 14.1; HRMS (ESI, *m/z*) calcd. For C<sub>18</sub>H<sub>24</sub>N<sub>3</sub>O<sub>3</sub> [M+H]<sup>+</sup>: 330.1818; found: 330.1822.

### *N*-(2-(*sec*-butylamino)-3,5-dimethoxyphenyl)picolinamide (3at)

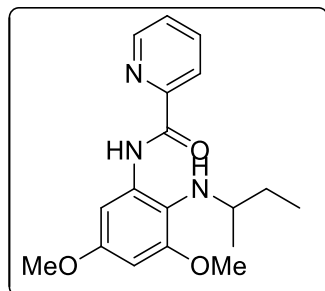

The general procedure for amination in aniline system was followed. Column chromatography (SiO<sub>2</sub>, eluting with 90:10 hexane/ethyl acetate) afforded the desired product as a gummy liquid (27.6 mg, 42% yield).

<sup>1</sup>H NMR (400 MHz, CDCl<sub>3</sub>): δ 11.03 (s, 1H), 8.63-8.62 (m, 1H), 8.26 (dt, *J*<sub>1</sub> = 7.6 Hz, *J*<sub>2</sub> = 1.2 Hz, 1H), 7.89-7.85 (m, 2H), 7.45-7.42 (m, 1H), 6.27 (d, *J* = 2.4 Hz, 1H), 3.84 (s, 3H), 3.79 (s, 3H), 2.98-2.90 (m, 1H), 1.68-1.57 (m, 1H), 1.47-1.39 (m, 1H), 1.04 (d, *J* = 6.4 Hz, 3H), 0.95 (t, *J* = 12.8 Hz, 3H); <sup>13</sup>C NMR (100 MHz, CDCl<sub>3</sub>): δ 162.1, 156.9, 154.9, 150.6, 148.3, 137.5, 134.9, 126.2, 122.3, 96.1, 95.1, 55.7, 30.2, 19.9, 10.5; HRMS (ESI, *m/z*) calcd. For C<sub>18</sub>H<sub>24</sub>N<sub>3</sub>O<sub>3</sub> [M+H]<sup>+</sup>: 330.1818; found: 330.1826.

### 3-cyclohexyl-2-(pyridin-2-yl)-3H-naphtho[1,2-d]imidazole (5a)

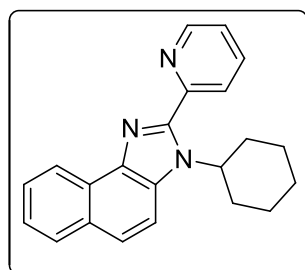

The general procedure for imidazole was followed. Column chromatography (SiO<sub>2</sub>, eluting with 90:10 hexane/ethyl acetate) afforded the desired product as a white solid (58 mg, 88% yield), mp 88-90°C.

<sup>1</sup>H NMR (400 MHz, CDCl<sub>3</sub>): δ 8.77 (d, *J* = 8.0 Hz, 1H), 8.72-8.70 (m, 1H), 8.36 (d, *J* = 8.0 Hz, 1H), 7.92 (d, *J* = 8.0 Hz, 1H), 7.89-7.83 (m, 2H), 7.68 (d, *J* = 8.8 Hz, 1H), 7.64-7.60 (m, 1H), 7.51-7.47 (m, 1H), 7.36-7.33 (m, 1H), 5.59-5.52 (m, 1H), 2.39-2.29 (m, 2H), 2.16-2.12 (m, 2H), 1.99-1.94 (m, 2H), 1.81 (d, *J* = 12.4 Hz, 1H), 1.52-1.34 (m, 3H); <sup>13</sup>C NMR (100 MHz, CDCl<sub>3</sub>): δ 148.9, 137.0, 131.3, 130.1, 128.6, 128.2, 126.6, 125.83, 125.8, 124.9, 123.81, 123.79, 123.55, 123.53, 122.2, 113.7, 57.2, 31.8, 26.3, 25.6; HRMS (ESI, *m/z*) calcd. For C<sub>22</sub>H<sub>22</sub>N<sub>3</sub> [M+H]<sup>+</sup>: 328.1814; found: 328.1822.

### 3-cyclopentyl-2-(pyridin-2-yl)-3H-naphtho[1,2-d]imidazole (5b)

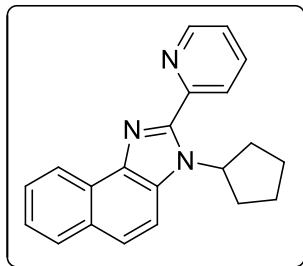

The general procedure for imidazole was followed. Column chromatography (SiO<sub>2</sub>, eluting with 90:10 hexane/ethyl acetate) afforded the desired product as a light brown solid (50 mg, 80% yield), mp 146–148 °C.

<sup>1</sup>H NMR (400 MHz, CDCl<sub>3</sub>): δ 8.73-8.72 (m, 1H), 8.51-8.48 (m, 1H), 8.25 (dt, *J*<sub>1</sub> = 8.0 Hz, *J*<sub>2</sub> = 1.2 Hz, 1H), 8.02-7.98 (m, 2H), 7.81 (d, *J* = 9.2 Hz, 1H), 7.75 (d, *J* = 9.2 Hz, 1H), 7.62-7.58 (m, 1H), 7.50-7.46 (m, 2H), 6.09 (quintet, *J* = 9.2 Hz, 1H), 2.25-2.14 (m, 4H), 2.05-1.98 (m, 2H), 1.75-1.68 (m, 2H); <sup>13</sup>C NMR (100 MHz, CDCl<sub>3</sub>): δ 151.1, 149.4, 149.3, 138.9, 137.9, 130.9, 130.2, 128.9, 127.4, 126.9, 125.7, 125.3, 124.5, 124.1, 121.8, 113.7, 57.7, 31.0, 25.3; HRMS (ESI, *m/z*) calcd. For C<sub>21</sub>H<sub>20</sub>N<sub>3</sub> [M+H]<sup>+</sup>: 314.1657; found: 314.1653.

### 3-propyl-2-(pyridin-2-yl)-3H-naphtho[1,2-d]imidazole (5c)

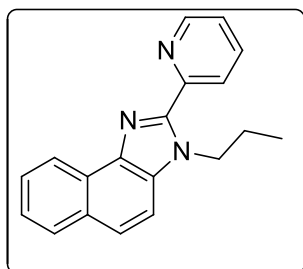

The general procedure for imidazole was followed. Column chromatography (SiO<sub>2</sub>, eluting with 90:10 hexane/ethyl acetate) afforded the desired product as a light brown solid (40 mg, 70% yield), mp 58-60 °C.

<sup>1</sup>H NMR (400 MHz, CDCl<sub>3</sub>): δ 8.75 (d, *J* = 8.0 Hz, 1H), 8.68-8.66 (m, 1H), 8.52 (dt, *J*<sub>1</sub> = 8.0 Hz, *J*<sub>2</sub> = 0.8 Hz, 1H), 7.93 (d, *J* = 8.4 Hz, 1H), 7.84 (td, *J*<sub>1</sub> = 8.0 Hz, *J*<sub>2</sub> = 1.6 Hz, 1H), 7.72 (d, *J* = 8.8 Hz, 1H), 7.66-7.62 (m, 1H), 7.55 (d, *J* = 8.8 Hz, 1H), 7.52-7.48 (m, 1H), 7.31-7.28 (m, 1H), 4.89 (t, *J* = 7.2 Hz, 2H), 1.98-1.89 (m, 2H), 0.93 (t, *J* = 7.2 Hz, 3H), <sup>13</sup>C NMR (100 MHz, CDCl<sub>3</sub>): δ 151.0, 148.7, 148.0, 138.2, 136.8, 133.1, 130.6, 128.5, 127.3, 126.6, 124.74, 124.66, 124.5, 123.3, 122.0, 110.9, 47.2, 24.0, 11.4; HRMS (ESI, *m/z*) calcd. For C<sub>19</sub>H<sub>18</sub>N<sub>3</sub> [M+H]<sup>+</sup>: 288.1501; found: 288.1497.

### 3-butyl-2-(pyridin-2-yl)-3H-naphtho[1,2-d]imidazole (5d)



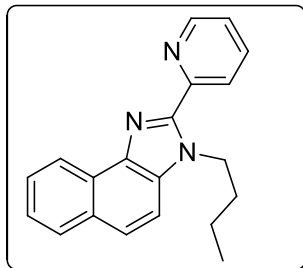

The general procedure for imidazole was followed. Column chromatography (SiO<sub>2</sub>, eluting with 90:10 hexane/ethyl acetate) afforded the desired product as a light brown solid (50 mg, 83% yield), mp 158-160 °C.

<sup>1</sup>H NMR (400 MHz, CDCl<sub>3</sub>): δ 9.69 (d, *J* = 8.4 Hz, 1H), 9.41 (d, *J* = 8.0 Hz, 1H), 8.78 (d, *J* = 4.4 Hz, 1H), 8.12 (td, *J*<sub>1</sub> = 7.6 Hz, *J*<sub>2</sub> = 1.2 Hz, 1H), 7.97 (d, *J* = 2.0 Hz, 1H), 7.95 (d, *J* = 3.2 Hz, 1H), 7.86-7.82 (m, 1H), 7.68-7.61 (m, 2H), 7.54 (dd, *J*<sub>1</sub> = 7.6 Hz, *J*<sub>2</sub> = 4.8 Hz, 1H), 5.04 (t, *J* = 7.6 Hz, 2H), 1.98-1.94 (m, 2H), 1.44 (sextet, *J* = 7.6 Hz, 2H), 0.97 (t, *J* = 7.2 Hz, 3H); <sup>13</sup>C NMR (100 MHz, CDCl<sub>3</sub>): δ 149.6, 143.7, 143.2, 138.4, 131.7, 130.1, 129.2, 129.0, 128.6, 128.2, 127.8, 126.5, 125.3, 109.6, 46.9, 32.0, 20.0, 13.6; HRMS (ESI, *m/z*) calcd. For C<sub>20</sub>H<sub>20</sub>N [M+H]<sup>+</sup>: 302.1657; found: 302.1663.

### 3-isobutyl-2-(pyridin-2-yl)-3H-naphtho[1,2-d]imidazole (5e)

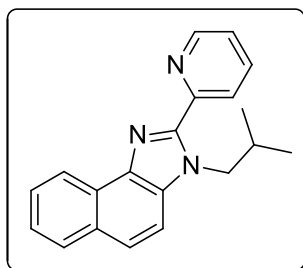

The general procedure for imidazole was followed. Column chromatography (SiO<sub>2</sub>, eluting with 90:10 hexane/ethyl acetate) afforded the desired product as a brown solid (52 mg, 86% yield), mp 74-76 °C.

<sup>1</sup>H NMR (400 MHz, CDCl<sub>3</sub>): δ 8.76-8.73 (m, 1H), 8.67-8.66 (m, 1H), 8.52 (dt, *J*<sub>1</sub> = 8.0 Hz, *J*<sub>2</sub> = 1.2 Hz, 1H), 7.93 (d, *J* = 7.6 Hz, 1H), 7.84 (td, *J*<sub>1</sub> = 8.0 Hz, *J*<sub>2</sub> = 2.0 Hz, 1H), 7.72 (d, *J* = 8.8 Hz, 1H), 7.66-7.62 (m, 1H), 7.55 (d, *J* = 9.2 Hz, 1H), 7.52-7.47 (m, 1H), 7.32-7.28 (m, 1H), 4.79 (d, *J* = 7.2 Hz, 2H), 2.31-2.20 (m, 1H), 0.88 (d, *J* = 6.4 Hz, 6H); <sup>13</sup>C NMR (100 MHz, CDCl<sub>3</sub>): δ 151.2, 148.5, 148.2, 138.2, 136.8, 133.5, 130.5, 128.5, 127.3, 126.6, 124.8, 124.7, 124.4, 123.3, 122.0, 111.3, 52.6, 30.1, 20.2; HRMS (ESI, *m/z*) calcd. For C<sub>20</sub>H<sub>20</sub>N<sub>3</sub> [M+H]<sup>+</sup>: 302.1579; found: 302.1658.

### 3-(sec-butyl)-2-(pyridin-2-yl)-3H-naphtho[1,2-d]imidazole (5f)

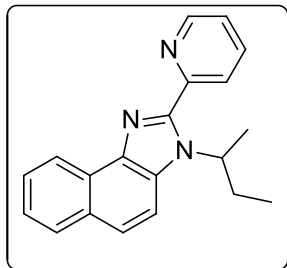

The general procedure for imidazole was followed. Column chromatography (SiO<sub>2</sub>, eluting with 90:10 hexane/ethyl acetate) afforded the desired product as a light brown solid (48 mg, 80% yield), mp 88-90 °C.

<sup>1</sup>H NMR (400 MHz, CDCl<sub>3</sub>): δ 8.76 (d, *J* = 8.0 Hz, 1H), 8.70-8.68 (m, 1H), 8.37 (dt, *J*<sub>1</sub> = 8.0 Hz, *J*<sub>2</sub> = 0.8 Hz, 1H), 7.92 (d, *J* = 8.0 Hz, 1H), 7.85 (td, *J*<sub>1</sub> = 7.6 Hz, *J*<sub>2</sub> = 2.0 Hz, 1H), 7.77 (d, *J* = 8.8 Hz, 1H), 7.67 (d, *J* = 8.8 Hz, 1H), 7.65-7.61 (m, 1H), 7.52-7.47 (m, 1H), 7.33-7.30 (m, 1H), 5.89-5.81 (m, 1H), 2.33-2.21 (m, 1H), 2.03-1.92 (m, 1H), 1.76 (d, *J* = 7.2 Hz, 3H), 0.74 (d, *J* = 7.2 Hz, 3H); <sup>13</sup>C NMR (100 MHz, CDCl<sub>3</sub>): δ 151.3, 149.2, 148.7, 139.1, 136.9, 131.1, 130.1, 128.3, 127.4, 126.5, 125.7, 124.8, 123.8, 123.4, 122.1, 113.3, 54.9, 28.8, 20.2, 11.2; HRMS (ESI, *m/z*) calcd. For C<sub>20</sub>H<sub>20</sub>N<sub>3</sub> [M+H]<sup>+</sup>: 302.1579; found: 302.1660.

### 3-(tert-butyl)-2-(pyridin-2-yl)-3H-naphtho[1,2-d]imidazole (5g)

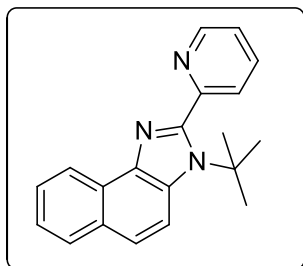

The general procedure for imidazole was followed. Column chromatography (SiO<sub>2</sub>, eluting with 80:20 hexane/ethyl acetate) afforded the desired product as light brown solid (43 mg, 72 % yield), mp 146-148 °C.

<sup>1</sup>H NMR (400 MHz, CDCl<sub>3</sub>): δ 8.75 (d, *J* = 8.0 Hz, 1H), 8.71-8.69 (m, 1H), 7.92-7.88 (m, 2H), 7.84 (td, *J*<sub>1</sub> = 7.6 Hz, *J*<sub>2</sub> = 2.0 Hz, 1H), 7.77 (d, *J* = 7.6 Hz, 1H), 7.70 (d, *J* = 9.2 Hz, 1H), 7.61-7.57 (m, 1H), 7.51-7.47 (m, 1H), 7.40-7.37 (m, 1H), 1.70 (m, 9H); <sup>13</sup>C NMR (100 MHz, CDCl<sub>3</sub>): δ 148.9, 136.6, 130.0, 128.0, 126.6, 125.9, 125.1, 124.0, 123.6, 122.5, 122.4, 114.9, 31.5; HRMS (ESI, *m/z*) calcd. For C<sub>20</sub>H<sub>20</sub>N<sub>3</sub> [M+H]<sup>+</sup>:302.1579; found:302.1660.

### 3-benzyl-2-(pyridin-2-yl)-3H-naphtho[1,2-d]imidazole (5h)

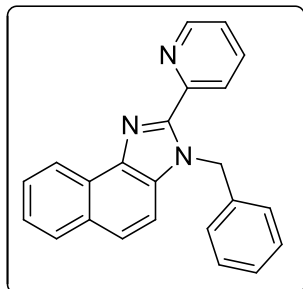

The general procedure 1 for imidazolone was followed. Column chromatography (SiO<sub>2</sub>, eluting with 90:10 hexane/ethyl acetate) afforded the desired product as a pale yellow solid (26.8 mg, 40% yield), mp 144-142 °C.

<sup>1</sup>H NMR (400 MHz, CDCl<sub>3</sub>): δ 8.78 (d, *J* = 8.4 Hz, 1H), 8.62-8.60 (m, 1H), 8.57 (d, *J* = 8.0 Hz, 1H), 7.91 (d, *J* = 8.0 Hz, 1H), 7.84 (td, *J*<sub>1</sub> = 8.0 Hz, *J*<sub>2</sub> = 2.0 Hz, 1H), 7.67-7.63 (m, 2H), 7.52-7.48 (m, 1H), 7.44 (d, *J* = 8.8 Hz, 1H), 7.30-7.27 (m, 1H), 7.22-7.13 (m, 5H), 6.30 (s, 2H); <sup>13</sup>C NMR (100 MHz, CDCl<sub>3</sub>): δ 150.6, 148.7, 147.9, 137.6, 136.9, 133.2, 130.7, 128.7, 128.5, 127.5, 127.1, 126.8, 124.9, 124.7, 123.6, 122.1, 111.1, 49.2; HRMS (ESI, *m/z*) calcd. For C<sub>24</sub>H<sub>18</sub>N<sub>3</sub> [M+H]<sup>+</sup>: 336.1501; found: 336.1502.

### 3-(furan-2-ylmethyl)-2-(pyridin-2-yl)-3H-naphtho[1,2-d]imidazole (5i)

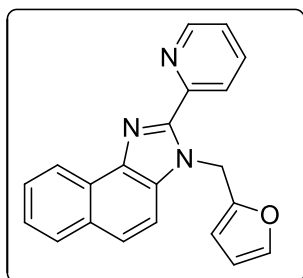

The general procedure 1 for imidazolone was followed. Column chromatography (SiO<sub>2</sub>, eluting with 90:10 hexane/ethyl acetate) afforded the desired product as a yellow solid (24.7 mg, 38% yield), mp 122-124 °C.

<sup>1</sup>H NMR (400 MHz, CDCl<sub>3</sub>): δ 8.75 (d, *J* = 8.4 Hz, 1H), 8.71-8.69 (m, 1H), 8.56 (d, *J* = 8.0 Hz, 1H), 7.93 (d, *J* = 8.4 Hz, 1H), 7.86 (td, *J*<sub>1</sub> = 8.0 Hz, *J*<sub>2</sub> = 2.0 Hz, 1H), 7.76-7.70 (m, 2H), 7.66-7.62 (m, 1H), 7.52-7.48 (m, 1H), 7.35-7.31 (m, 1H), 7.26 (dd, *J*<sub>1</sub> = 1.6 Hz, *J*<sub>2</sub> = 0.8 Hz, 1H), 6.29 (s, 2H), 6.22-6.19 (m, 2H); <sup>13</sup>C NMR (100 MHz, CDCl<sub>3</sub>): δ 150.8, 148.5, 147.4, 142.3, 137.0, 133.1, 130.7, 128.5, 127.0, 126.7, 124.9, 124.8, 123.6, 122.1, 111.1, 110.5, 108.3, 42.3; HRMS (ESI, *m/z*) calcd. For C<sub>21</sub>H<sub>16</sub>N<sub>3</sub>O [M+H]<sup>+</sup>: 326.1293; found: 326.1294.

### 3-((3*r*,5*r*,7*r*)-adamantan-1-ylmethyl)-2-(pyridin-2-yl)-3H-naphtho[1,2-d]imidazole (5j)

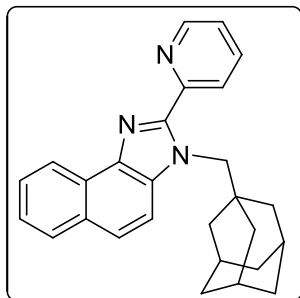

The general procedure for imidazole was followed. Column chromatography (SiO<sub>2</sub>, eluting with 90:10 hexane/ethyl acetate) afforded the desired product as a creamy white solid (61 mg, 78% yield), mp 176–178 °C.

<sup>1</sup>H NMR (400 MHz, CDCl<sub>3</sub>): δ 8.75 (d, *J* = 8.0 Hz, 1H), 8.67-8.65 (m, 1H), 8.41 (dt, *J*<sub>1</sub> = 8.0 Hz, *J*<sub>2</sub> = 0.8 Hz, 1H), 7.93 (d, *J* = 8.0 Hz, 1H), 7.86 (td, *J*<sub>1</sub> = 7.6 Hz, *J*<sub>2</sub> = 2.0 Hz, 1H), 7.70 (d, *J* = 8.8 Hz, 1H), 7.66-7.62 (m, 1H), 7.59 (d, *J* = 8.8 Hz, 1H), 7.51-7.47 (m, 1H), 7.33-7.30 (m, 1H), 1.79 (s, 3H), 1.57-1.36 (m, 14H); <sup>13</sup>C NMR (100 MHz, CDCl<sub>3</sub>): δ 152.0, 149.1, 148.4, 137.1, 134.2, 130.4, 128.7, 128.4, 127.1, 126.7, 125.2, 124.8, 124.1, 123.5, 122.0, 112.4, 55.8, 41.0, 36.8, 36.6, 28.3; HRMS (ESI, *m/z*) calcd. For C<sub>27</sub>H<sub>28</sub>N<sub>3</sub> [M+H]<sup>+</sup>: 394.2283; found: 394.2304.

***tert*-butyl 4-(2-(pyridin-2-yl)-3H-naphtho[1,2-d]imidazol-3-yl)piperidine-1-carboxylate (5k)**

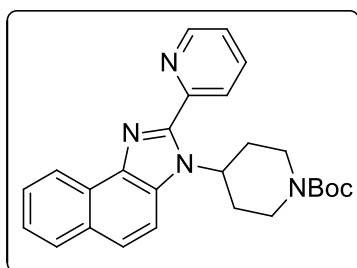

The general procedure for imidazole was followed. Column chromatography (SiO<sub>2</sub>, eluting with 85:15 hexane/ethyl acetate) afforded the desired product as a creamy white solid (59 mg, 69 % yield), mp 112-114 °C.

<sup>1</sup>H NMR (400 MHz, CDCl<sub>3</sub>): δ 8.76 (d, *J* = 8.0 Hz, 1H), 8.69-8.67 (m, 1H), 8.44 (d, *J* = 8.0 Hz, 1H), 7.93-7.87 (m, 2H), 7.74 (d, *J* = 9.2 Hz, 1H), 7.68 (d, *J* = 9.2 Hz, 1H), 7.65-7.61 (m, 1H), 7.52-7.48 (m, 1H), 7.37-7.34 (m, 1H), 5.94-5.85 (m, 1H), 4.35 (s, 2H), 2.88 (t, *J* = 9.6 Hz, 2H), 2.59-2.49 (m, 2H), 2.10 (dd, *J*<sub>1</sub> = 12.0 Hz, *J*<sub>2</sub> = 2.0 Hz, 2H), 1.53 (s, 9H); <sup>13</sup>C NMR (100 MHz, CDCl<sub>3</sub>): δ 154.9, 148.8, 148.3, 137.2, 131.1, 130.1, 128.3, 126.8, 125.8, 125.1, 124.3, 123.7, 122.1, 113.2, 80.0, 55.4, 30.8, 28.6; HRMS (ESI, *m/z*) calcd. For C<sub>26</sub>H<sub>29</sub>N<sub>4</sub>O<sub>2</sub> [M+H]<sup>+</sup>: 429.2291; found: 429.2285.

**3-cyclohexyl-2-(5-methylpyrazin-2-yl)-3H-naphtho[1,2-d]imidazole (5l)**

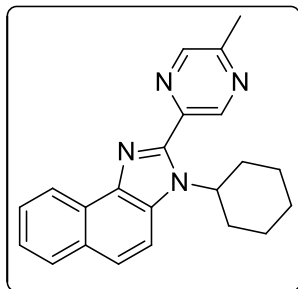

The general procedure for imidazole was followed. Column chromatography (SiO<sub>2</sub>, eluting with 85:15 hexane/ethyl acetate) afforded the desired product as a pale yellow powder (40.3 mg, 59% yield), mp 188-190 °C.

<sup>1</sup>H NMR (400 MHz, CDCl<sub>3</sub>): δ 9.46 (s, 1H), 8.74 (d, *J* = 8.0 Hz, 1H), 8.51 (s, 1H), 7.91 (d, *J* = 8.0 Hz, 1H), 7.82 (d, *J* = 9.2 Hz, 1H), 7.68 (d, *J* = 9.2 Hz, 1H), 7.65-7.61 (m, 1H), 7.52-7.48 (m, 1H), 5.45-5.37 (m, 1H), 2.65 (s, 3H), 2.38-2.29 (m, 2H), 2.11 (d, *J* = 11.2 Hz, 2H), 1.96 (d, *J* = 12.8 Hz, 2H), 1.81 (d, *J* = 11.6 Hz, 1H), 1.50-1.34 (m, 3H); <sup>13</sup>C NMR (100 MHz, CDCl<sub>3</sub>): δ 153.1, 146.17, 146.16, 145.7, 142.7, 131.5, 130.1, 128.3, 127.3, 126.7, 125.0, 124.1, 122.1, 113.5, 57.3, 31.9, 26.2, 25.6, 21.7; HRMS (ESI, *m/z*) calcd. For C<sub>22</sub>H<sub>23</sub>N<sub>4</sub> [M+H]<sup>+</sup>: 343.1923; found: 343.1926.

### 3-cyclohexyl-2-(quinolin-2-yl)-3H-naphtho[1,2-d]imidazole (5m)

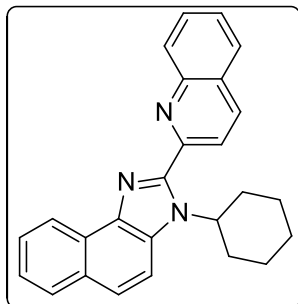

The general procedure for imidazole was followed. Column chromatography (SiO<sub>2</sub>, eluting with 90:10 hexane/ethyl acetate) afforded the desired product as a creamy white solid (38 mg, 50% yield), mp 180-182 °C.

<sup>1</sup>H NMR (400 MHz, CDCl<sub>3</sub>): δ 8.80 (d, *J* = 8.0 Hz, 1H), 8.61 (d, *J* = 8.8 Hz, 1H), 8.31 (d, *J* = 8.4 Hz, 1H), 8.11 (d, *J* = 8.8 Hz, 1H), 7.93 (d, *J* = 8.0 Hz, 1H), 7.89-7.86 (m, 2H), 7.78-7.73 (m, 1H), 7.70 (d, *J* = 9.2 Hz, 1H), 7.67-7.63 (m, 1H), 7.60-7.56 (m, 1H), 7.53-7.49 (m, 1H), 6.14-6.06 (m, 1H), 2.47-2.37 (m, 2H), 2.27-2.24 (m, 2H), 2.02 (d, *J* = 13.6 Hz, 2H), 1.85 (d, *J* = 12.8 Hz, 1H), 1.61-1.50 (m, 2H), 1.47-1.39 (m, 1H); <sup>13</sup>C NMR (100 MHz, CDCl<sub>3</sub>): δ 151.0, 148.3, 147.4, 136.6, 132.0, 130.1, 129.83, 129.79, 128.3, 127.8, 127.6, 127.5, 127.2, 126.6, 124.9, 124.1, 122.9, 122.2, 113.8, 57.5, 32.0, 26.5, 25.8; HRMS (ESI, *m/z*) calcd. For C<sub>26</sub>H<sub>24</sub>N<sub>3</sub> [M+H]<sup>+</sup>: 378.1970; found: 378.1974.

### 5-bromo-3-cyclohexyl-2-(pyridin-2-yl)-3H-naphtho[1,2-d]imidazole (5n)

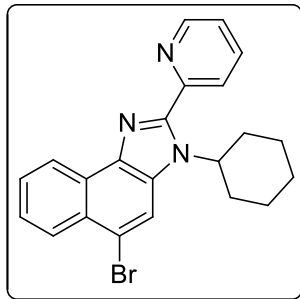

The general procedure for imidazole was followed. Column chromatography (SiO<sub>2</sub>, eluting with 90:10 hexane/ethyl acetate) afforded the desired product as a creamy white powder (67 mg, 83% yield), mp 154-156 °C.

<sup>1</sup>H NMR (400 MHz, CDCl<sub>3</sub>): δ 8.79 (d, *J* = 8.0 Hz, 1H), 8.72-8.70 (m, 1H), 8.35 (dt, *J*<sub>1</sub> = 8.0 Hz, *J*<sub>2</sub> = 0.8 Hz, 1H), 8.31-8.29 (m, 1H), 8.19 (s, 1H), 7.88 (td, *J*<sub>1</sub> = 7.6 Hz, *J*<sub>2</sub> = 2.0 Hz, 1H), 7.69-7.65 (m, 1H), 7.62-7.57 (m, 1H), 7.38-7.34 (m, 1H), 5.59-5.52 (m, 1H), 2.33-2.23 (m, 2H), 2.16-2.12 (m, 2H), 2.00-1.96 (m, 2H), 1.82-1.79 (m, 1H), 1.52-1.37 (m, 3H); <sup>13</sup>C NMR (100 MHz, CDCl<sub>3</sub>): δ 148.9, 137.0, 131.2, 128.6, 128.2, 127.8, 127.3, 126.8, 126.1, 125.8, 123.7, 122.5, 117.6, 57.4, 31.9, 26.2, 25.5; HRMS (ESI, *m/z*) calcd. For C<sub>22</sub>H<sub>21</sub>BrN<sub>3</sub> [M+H]<sup>+</sup>: 406.0919; found: 406.0926.

### 3-cyclohexyl-5-fluoro-2-(pyridin-2-yl)-3H-naphtho[1,2-d]imidazole (5o)

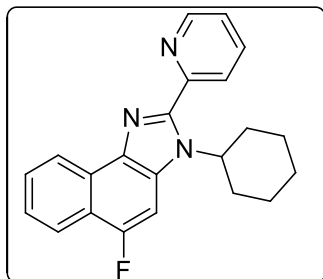

The general procedure for imidazole was followed. Column chromatography (SiO<sub>2</sub>, eluting with 90:10 hexane/ethyl acetate) afforded the desired product as a white solid (63.5 mg, 92% yield), mp 128-130 °C.

<sup>1</sup>H NMR (400 MHz, CDCl<sub>3</sub>): δ 8.77 (d, *J* = 8.0 Hz, 1H), 8.71-8.69 (m, 1H), 8.34 (d, *J* = 8.0 Hz, 1H), 8.14 (d, *J* = 8.0 Hz, 1H), 7.87 (td, *J*<sub>1</sub> = 7.6 Hz, *J*<sub>2</sub> = 1.6 Hz, 1H), 7.69-7.66 (m, 1H), 7.57-7.53 (m, 2H), 7.36-7.33 (m, 1H), 5.61-5.23 (m, 1H), 2.31-2.21 (m, 2H), 2.15-2.11 (m, 2H), 1.99-1.95 (m, 2H), 1.82-1.78 (m, 1H), 1.52-1.33 (m, 3H); <sup>13</sup>C NMR (100 MHz, CDCl<sub>3</sub>): δ 155.7 (d, *J* = 245.4 Hz), 151.0, 148.9, 136.9, 129.9 (d, *J* = 13.4 Hz), 128.6, 127.6, 127.4 (d, *J* = 5.3 Hz), 125.5, 125.0, 123.5, 122.1, 121.3 (d, *J* = 5.7 Hz), 120.8 (d, *J* = 18.2 Hz), 98.2 (d, *J* = 27.3 Hz), 57.2, 31.7, 26.2, 25.6; <sup>19</sup>F NMR (376 MHz, CDCl<sub>3</sub>): δ -126.54 (s, 1F); HRMS (ESI, *m/z*) calcd. For C<sub>22</sub>H<sub>21</sub>FN<sub>3</sub> [M+H]<sup>+</sup>: 346.1720; found: 346.1719.

### 3-cyclohexyl-5-methyl-2-(pyridin-2-yl)-3H-naphtho[1,2-d]imidazole (5p)

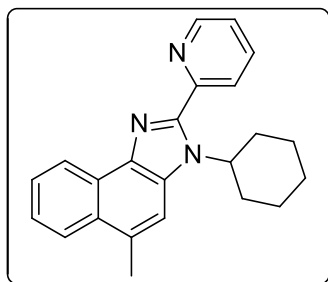

The general procedure for imidazole was followed. Column chromatography (SiO<sub>2</sub>, eluting with 90:10 hexane/ethyl acetate) afforded the desired product as creamy white solid (58 mg, 85% yield), mp 132-134 °C.

<sup>1</sup>H NMR (400 MHz, CDCl<sub>3</sub>): δ 8.95 (s, 1H), 8.73-8.71 (m, 1H), 8.48 (s, 1H), 8.04 (d, *J* = 8.4 Hz, 1H), 7.93-7.89 (m, 1H), 7.69-7.65 (m, 2H), 7.58-7.55 (m, 1H), 7.38-7.35 (m, 1H), 5.59-5.50 (m, 1H), 2.81 (s, 3H), 2.40-2.31 (m, 2H), 2.16-2.12 (m, 2H), 1.99-1.96 (m, 2H), 1.83-1.79 (m, 1H), 1.52-1.37 (m, 3H); <sup>13</sup>C NMR (100 MHz, CDCl<sub>3</sub>): δ 151.2, 148.8, 148.0, 137.9, 136.9, 131.1, 130.1, 129.4, 127.3, 126.3, 125.6, 124.7, 123.3, 122.6, 113.9, 57.1, 31.9, 26.3, 25.6, 20.7; HRMS (ESI, *m/z*) calcd. For C<sub>23</sub>H<sub>24</sub>N<sub>3</sub> [M+H]<sup>+</sup>: 342.1970; found: 342.1971.

### 3-cyclohexyl-9-methyl-2-(pyridin-2-yl)-3H-naphtho[1,2-d]imidazole (5q)

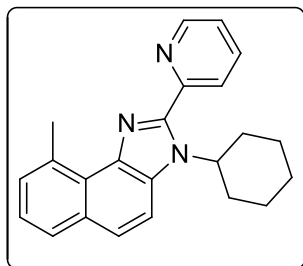

The general procedure for imidazole was followed. Column chromatography (SiO<sub>2</sub>, eluting with 90:10 hexane/ethyl acetate) afforded the desired product as a creamy white solid (54.5 mg, 80% yield), mp 140-142 °C.

<sup>1</sup>H NMR (400 MHz, CDCl<sub>3</sub>): δ 8.70-8.68 (m, 1H), 8.42 (dt, *J*<sub>1</sub> = 8.0 Hz, *J*<sub>2</sub> = 0.8 Hz, 1H), 7.87-7.82 (m, 2H), 7.79-7.76 (m, 1H), 7.67 (d, *J* = 8.8 Hz, 1H), 7.43-7.36 (m, 2H), 7.32-7.29 (m, 1H), 5.86-5.78 (m, 1H), 3.29 (s, 3H), 2.43-2.33 (m, 2H), 2.16-2.11 (m, 2H), 1.99-1.95 (m, 2H), 1.81 (d, *J* = 11.2 Hz, 1H), 1.55-1.35 (m, 3H); <sup>13</sup>C NMR (100 MHz, CDCl<sub>3</sub>): δ 148.6, 147.3, 136.8, 135.0, 132.53, 132.48, 131.0, 128.5, 126.5, 126.4, 125.7, 124.6, 124.2, 123.2, 113.5, 56.9, 31.7, 26.3, 25.7, 23.8; HRMS (ESI, *m/z*) calcd. For C<sub>23</sub>H<sub>24</sub>N<sub>3</sub> [M+H]<sup>+</sup>: 342.1970; found: 342.1973.

### 3-cyclohexyl-5-(1H-pyrazol-1-yl)-2-(pyridin-2-yl)-3H-naphtho[1,2-d]imidazole (5r)

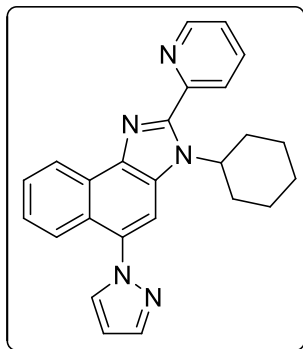

The general procedure for imidazole was followed. Column chromatography (SiO<sub>2</sub>, eluting with 80:20 hexane/ethyl acetate) afforded the desired product as a creamy white solid (43 mg, 55% yield), mp 174-176 °C.

<sup>1</sup>H NMR (400 MHz, CDCl<sub>3</sub>): δ 8.85 (d, *J* = 8.0 Hz, 1H), 8.73-8.71 (m, 1H), 8.38 (d, *J* = 8.0 Hz, 1H), 7.95 (s, 1H), 7.92-7.84 (m, 3H), 7.68-7.64 (m, 1H), 7.60 (d, *J* = 8.0 Hz, 1H), 7.50-7.46 (m, 1H), 7.39-7.35 (m, 1H), 6.58 (t, *J* = 2.0 Hz, 1H), 5.62-5.54 (m, 1H), 2.34-2.23 (m, 2H), 2.17-2.13 (m, 2H), 1.96-1.91 (m, 2H), 1.76 (d, *J* = 12.4 Hz, 1H), 1.50-1.40 (m, 2H), 1.37-1.29 (m, 1H); <sup>13</sup>C NMR (100 MHz, CDCl<sub>3</sub>): δ 149.9, 149.0, 140.8, 137.1, 133.5, 132.5, 129.9, 127.3, 127.2, 126.6, 126.0, 125.9, 123.8, 123.6, 122.5, 112.1, 106.5, 57.5, 32.0, 26.2, 25.4; HRMS (ESI, *m/z*) calcd. For C<sub>25</sub>H<sub>24</sub>N<sub>5</sub> [M+H]<sup>+</sup>: 394.2032; found: 394.2036.

**5-(1H-benzo[d][1,2,3]triazol-1-yl)-3-cyclohexyl-2-(pyridin-2-yl)-3H-naphtho[1,2-d]imidazole (5s)**

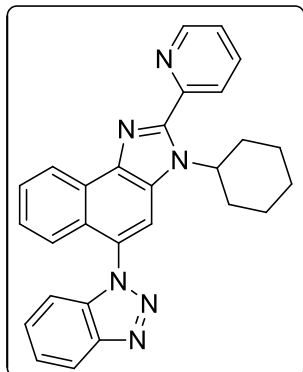

The general procedure for imidazole was followed. Column chromatography (SiO<sub>2</sub>, eluting with 80:20 hexane/ethyl acetate) afforded the desired product as a creamy white solid (43.5 mg, 49% yield), mp 214-216 °C.

<sup>1</sup>H NMR (400 MHz, CDCl<sub>3</sub>): δ 8.90 (d, *J* = 8.0 Hz, 1H), 8.74-8.73 (m, 1H), 8.40 (d, *J* = 7.6 Hz, 1H), 8.26-8.21 (m, 1H), 8.07 (s, 1H), 7.91 (td, *J*<sub>1</sub> = 8.0 Hz, *J*<sub>2</sub> = 2.0 Hz, 1H), 7.71-7.67 (m, 1H), 7.51-7.46 (m, 2H), 7.45-7.37 (m, 2H), 7.30-7.27 (m, 2H), 5.67-5.59 (m, 1H), 2.29-2.16 (m, 4H),



1.91 (d,  $J = 13.2$  Hz, 2H), 1.72 (d,  $J = 12.8$  Hz, 1H), 1.49-1.38 (m, 2H), 1.31-1.20 (m, 1H);  $^{13}\text{C}$  NMR (100 MHz,  $\text{CDCl}_3$ ):  $\delta$  150.6, 150.5, 149.0, 145.8, 140.3, 137.1, 135.4, 130.0, 128.3, 128.1, 127.6, 127.5, 126.2, 125.96, 125.92, 124.4, 123.9, 123.2, 122.8, 120.3, 113.6, 110.7, 57.6, 32.1, 26.1, 25.3; HRMS (ESI,  $m/z$ ) calcd. For  $\text{C}_{28}\text{H}_{25}\text{N}_6$   $[\text{M}+\text{H}]^+$ : 445.2141; found: 445.2140.

### 3-cyclohexyl-1H-naphtho[1,2-d]imidazol-2(3H)-one (8a)

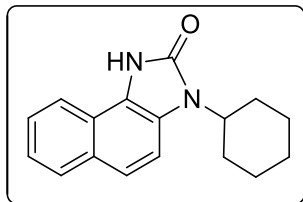

Column chromatography ( $\text{SiO}_2$ , eluting with 75:25 hexane/ethyl acetate) afforded the desired product as a light pink solid.

$^1\text{H}$  NMR (400 MHz,  $\text{CDCl}_3$ ):  $\delta$  11.40 (s, 1H), 8.04 (d,  $J = 8.0$  Hz, 1H), 7.85 (d,  $J = 8.4$  Hz, 1H), 7.58-7.53 (m, 2H), 7.50 (d,  $J = 8.8$  Hz, 1H), 7.41-7.37 (m, 1H), 4.51-4.24 (m, 1H), 2.28-2.18 (m, 2H), 1.99-1.94 (m, 4H), 1.81 (d,  $J = 12.8$  Hz, 1H), 1.59-1.48 (m, 2H), 1.39-1.32 (m, 1H);  $^{13}\text{C}$  NMR (100 MHz,  $\text{CDCl}_3$ ):  $\delta$  155.4, 129.1, 128.6, 126.5, 124.9, 124.2, 122.5, 121.4, 120.6, 119.9, 110.9, 53.1, 30.8, 26.1, 25.5; HRMS (ESI,  $m/z$ ) calcd. For  $\text{C}_{17}\text{H}_{19}\text{N}_2\text{O}$   $[\text{M}+\text{H}]^+$ : 267.1497; found: 267.1506.

### 3-(*tert*-butyl)-1H-naphtho[1,2-d]imidazol-2(3H)-one (8b)

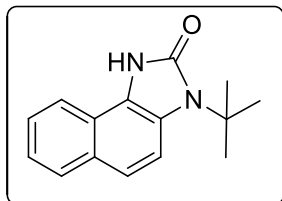

Column chromatography ( $\text{SiO}_2$ , eluting with 75:25 hexane/ethyl acetate) afforded the desired product as a white solid.

$^1\text{H}$  NMR (400 MHz,  $\text{CDCl}_3$ ):  $\delta$  11.71 (s, 1H), 8.05 (d,  $J = 8.4$  Hz, 1H), 7.83 (d,  $J = 8.4$  Hz, 1H), 7.69 (d,  $J = 8.8$  Hz, 1H), 7.54-7.49 (m, 2H), 7.41-7.39 (m, 1H), 1.91 (s, 9H);  $^{13}\text{C}$  NMR (100 MHz,  $\text{CDCl}_3$ ):  $\delta$  156.3, 128.8, 128.3, 126.2, 125.7, 124.3, 123.2, 120.7, 120.6, 119.7, 113.3, 58.6, 29.8; HRMS (ESI,  $m/z$ ) calcd. For  $\text{C}_{15}\text{H}_{17}\text{N}_2\text{O}$   $[\text{M}+\text{H}]^+$ : 241.1341; found: 241.1344.

## References.

- 1) Nemchik, A.; Badescu, V., *Tetrahedron*, 2003, **59**, 4315-4325.
- 2) Phanstiel, O.; Wang, Q. X.; Powell, D. H.; Ospina, M. P.; Leeson, B. A., *J. Org. Chem.*, 1999, **64**, 803-806.
- 3) Xue, Y.; Fan, Z.; Jiang, X.; Wu, K.; Wang, M.; Ding, C.; Yao, Q.; Zhang, A., *Eur. J. Org. Chem.*, 2014, **2014**, 7481-7488.
- 4) Selvam, J. J. P.; Suresh, V.; Rajesh, K.; Reddy, S. R.; Venkateswarlu, Y., *Tet. Lett.*, 2006, **47**, 2507-2509.
- 5) Beesu, M.; Malladi, S. S.; Fox, L. M.; Jones, C. D.; Dixit, A.; David, S. A., *J. Med. Chem.*, 2014, **57**, 7325-7341.
- 6) Smout, V.; Peschiulli, A.; Verbeeck, S.; Mitchell, E. A.; Herrebout, W.; Bultinck, P.; Vande Velde, C. M. L.; Berthelot, D.; Meerpoel, L.; Maes, B. U. W., *J. Org. Chem.*, 2013, **78**, 9803-9814.

## **<sup>1</sup>H NMR and <sup>13</sup>C NMR Spectra:**



HM-682  
single\_pulse

8.654  
8.624  
8.610  
8.608  
8.600  
8.597  
8.598  
8.596  
8.594  
8.591  
8.012  
7.992  
7.891  
7.888  
7.886  
7.869  
7.854  
7.835  
7.834  
7.804  
7.793  
7.790  
7.780  
7.473  
7.460  
7.441  
7.441  
7.404  
7.401  
7.387  
7.384  
7.079  
6.293  
-5.169

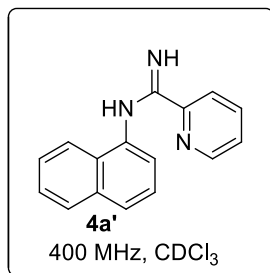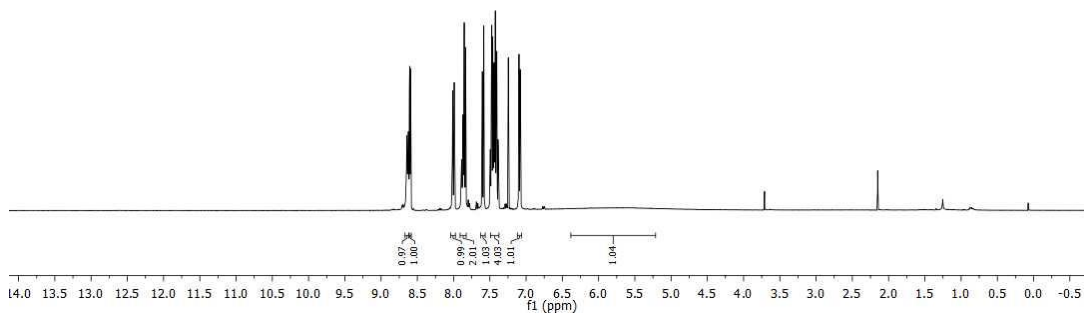

HM-682  
single pulse decoupled gated NOE

152.856  
151.318  
148.077  
137.018  
134.773  
130.103  
127.386  
126.389  
126.247  
125.840  
123.980  
123.957  
121.996  
118.313

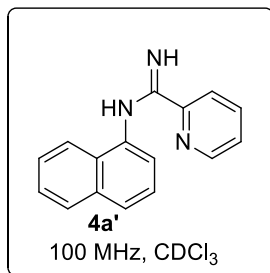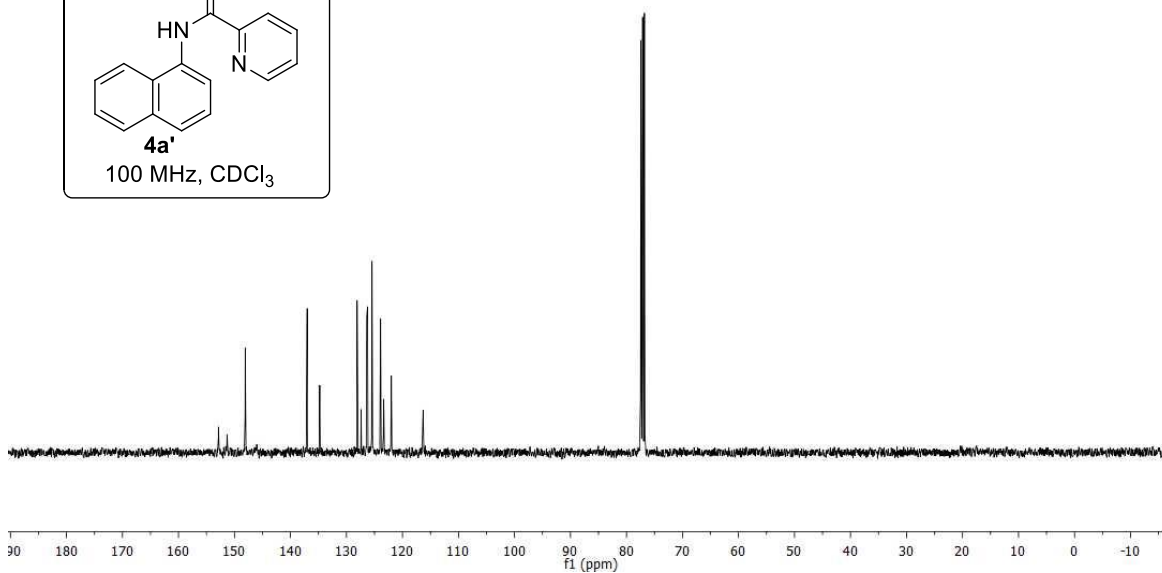

HM-345A  
single\_pulse

9.755  
9.683  
9.681  
9.679  
9.677  
9.674  
9.671  
9.667  
9.665  
9.349  
9.346  
9.344  
9.329  
9.327  
9.324  
9.324  
7.925  
7.910  
7.905  
7.890  
7.888  
7.883  
7.711  
7.706  
7.704  
7.682  
7.510  
7.513  
7.498  
7.491  
7.482  
7.479  
7.411  
7.406  
7.394  
7.390  
7.387  
7.373  
7.370  
7.231  
7.228  
7.218  
7.208  
7.194  
7.191  
7.185  
7.509  
5.900  
5.898  
5.895  
5.465  
5.440  
2.115  
2.090  
2.086  
1.790  
1.781  
1.757  
1.747  
1.739  
1.653  
1.648  
1.645  
1.621  
1.612  
1.483  
1.445  
1.399  
1.382  
1.380  
1.303  
1.294  
1.267  
1.254  
1.236  
1.208

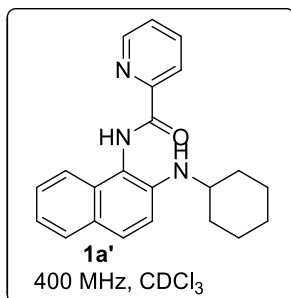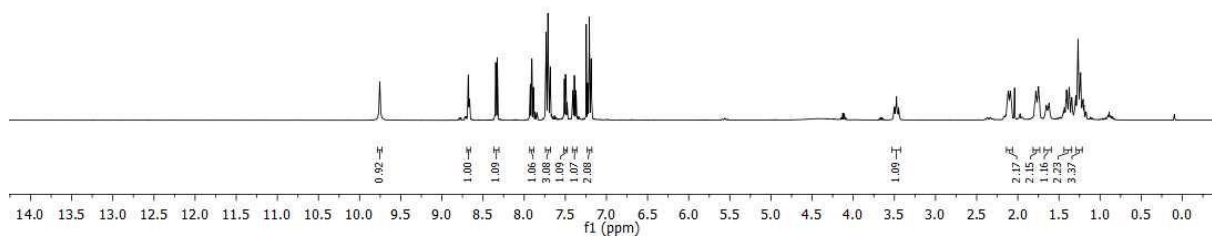

HM-345A  
single pulse decoupled gated NOE

163.362  
149.789  
148.420  
141.486  
137.717  
131.475  
128.746  
128.308  
126.988  
126.635  
122.767  
122.054  
120.536  
115.361  
113.067  
51.954  
33.845  
25.937  
25.107

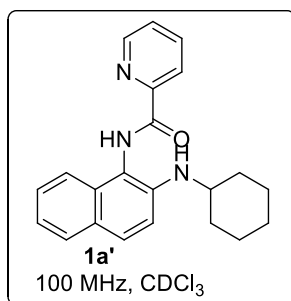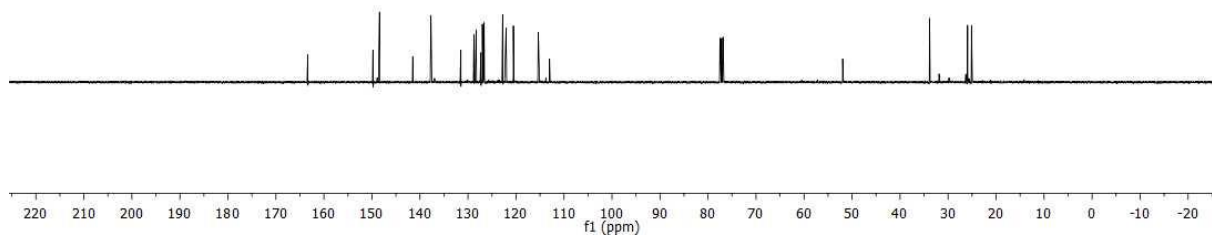

HM-1080  
single\_pulse

8.269  
7.927  
7.967  
7.949  
7.895  
7.889  
7.883  
7.862  
7.737  
7.716  
7.588  
7.570  
7.551  
7.449  
7.519  
7.502  
7.498  
7.495  
7.488  
7.478  
7.469

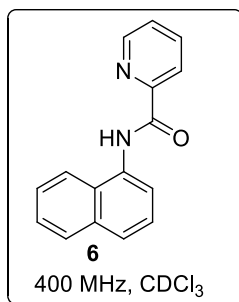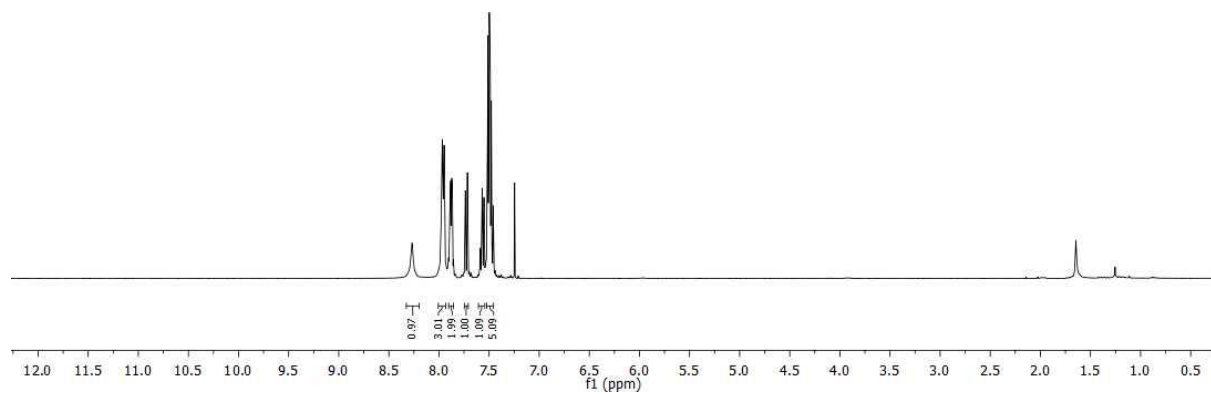

HM-1080  
single pulse decoupled gated NOE

166.407

134.015  
133.753  
132.489  
132.034  
128.943  
128.910  
127.623  
127.310  
126.493  
126.238  
125.162  
124.858  
121.469  
120.862

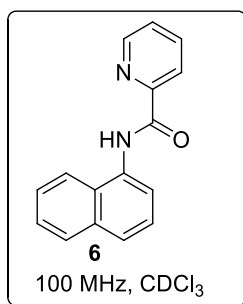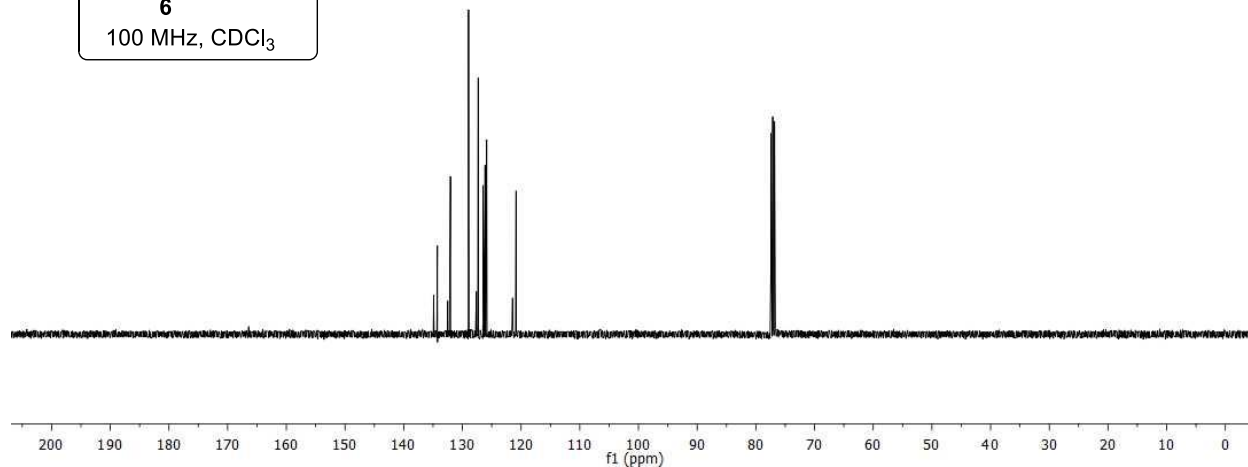

HM-1079P  
single\_pulse

8.013  
7.981  
7.991  
7.988  
7.984  
7.676  
7.667  
7.655  
7.594  
7.584  
7.562  
7.540  
7.525  
7.518  
7.489  
7.486  
7.470  
7.462  
7.449  
7.327  
7.314  
7.302  
7.292  
7.289  
7.284  
7.187  
7.139  
7.111  
7.116  
7.108

3.387  
3.370  
3.362  
3.352  
3.336  
3.329

1.988  
1.694  
1.686  
1.661  
1.652  
1.576  
1.569  
1.552  
1.538  
1.348  
1.320  
1.286  
1.256  
1.249  
1.179

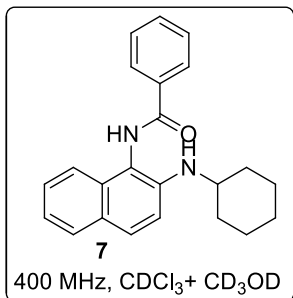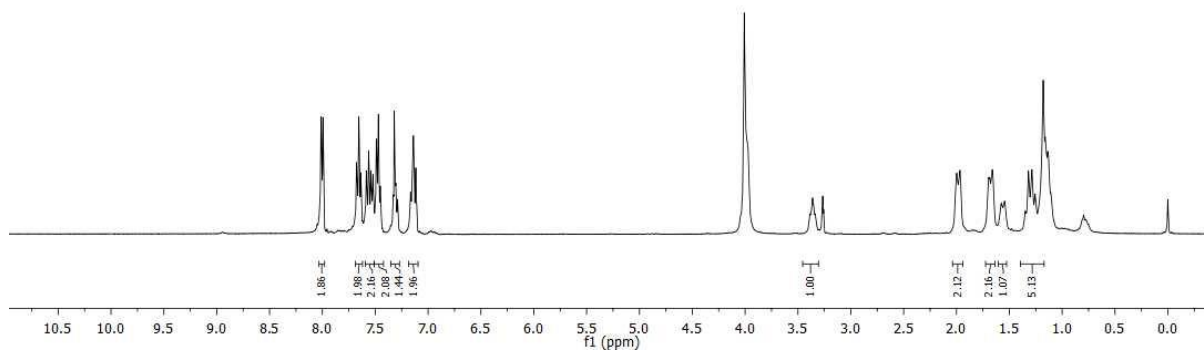

HM-1079P  
single pulse decoupled gated NOE

171.877

137.708  
136.146  
135.592  
132.865  
132.765  
132.130  
131.618  
131.518  
130.979  
126.546  
124.754  
119.756

56.805

37.322  
33.609  
29.600  
28.861

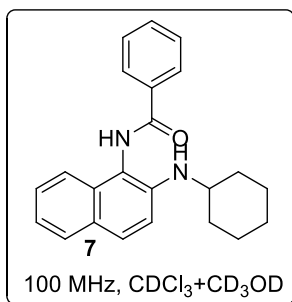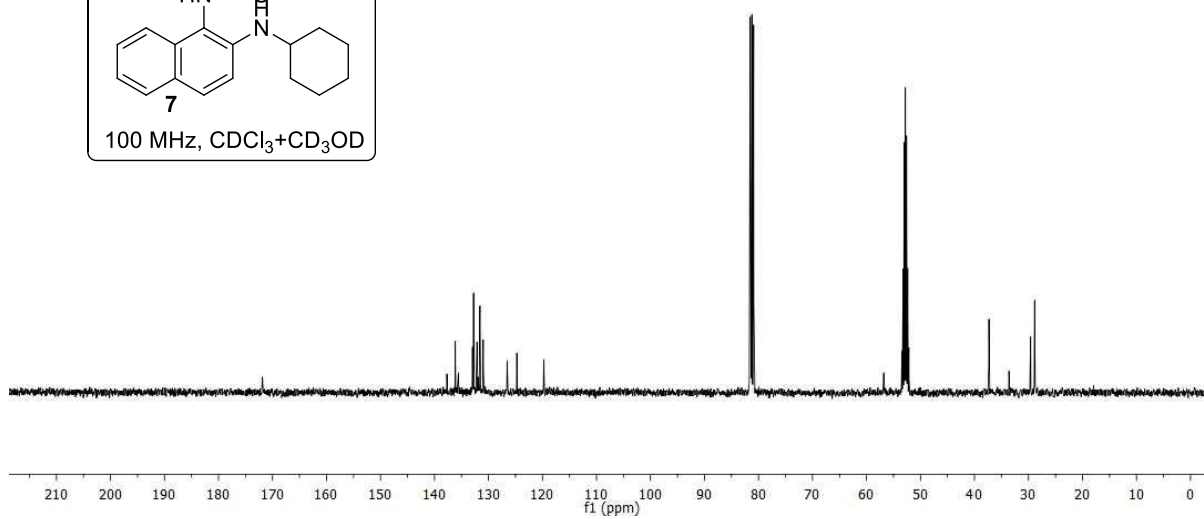

HM-1587  
single\_pulse

8.022  
8.017  
8.014  
7.986  
7.985  
7.975  
7.572  
7.569  
7.553  
7.555  
7.554  
7.482  
7.460  
7.446  
7.430  
7.416  
7.411

3.068  
3.059  
3.043  
3.034  
3.024  
3.014  
3.008  
2.998  
1.975  
1.966  
1.944  
1.935  
1.920  
1.909  
1.771  
1.765  
1.735  
1.639  
1.616  
1.600  
1.590  
1.388  
1.302  
1.280  
1.258  
1.204  
1.173

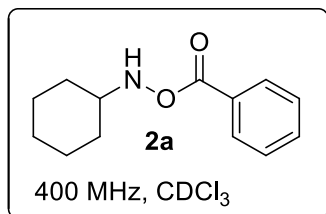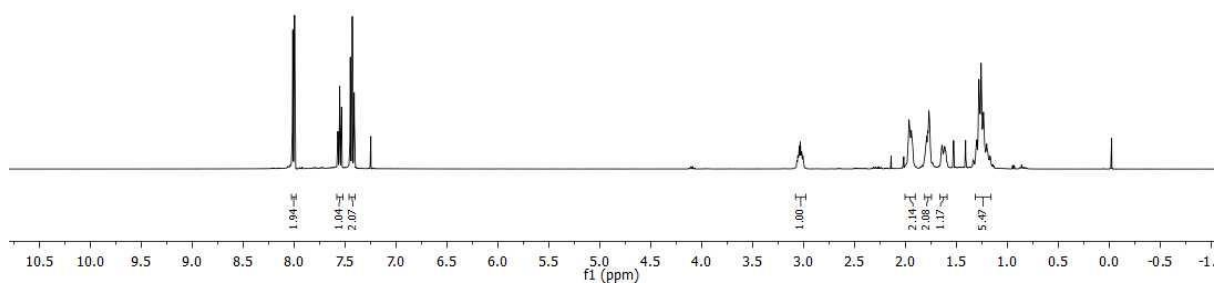

HM-1587  
single pulse decoupled gated NOE

-167.033

-133.300  
-128.578  
-128.578

-59.926

-30.407  
-25.914  
-24.521

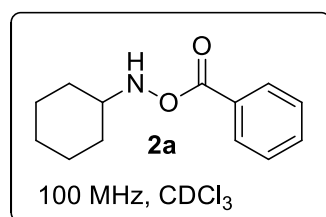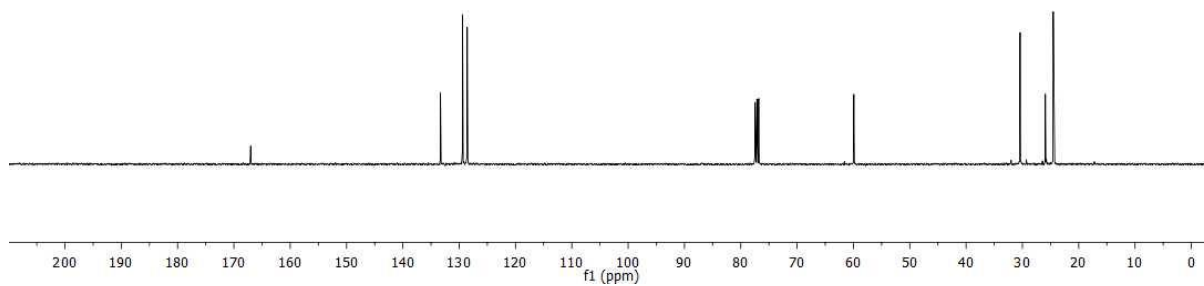



HM-1591  
single\_pulse

8.025  
8.020  
8.019  
8.019  
7.999  
7.996  
7.862  
7.584  
7.581  
7.577  
7.566  
7.562  
7.543  
7.540  
7.461  
7.457  
7.453  
7.437  
7.419  
7.417

3.148  
3.130  
3.112  
1.632  
1.614  
1.595  
1.577  
1.572  
1.558  
1.468  
1.430  
1.411  
1.393  
0.955  
0.936  
0.918

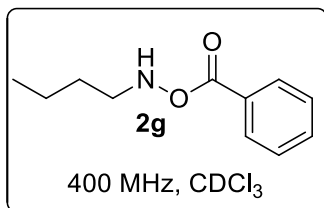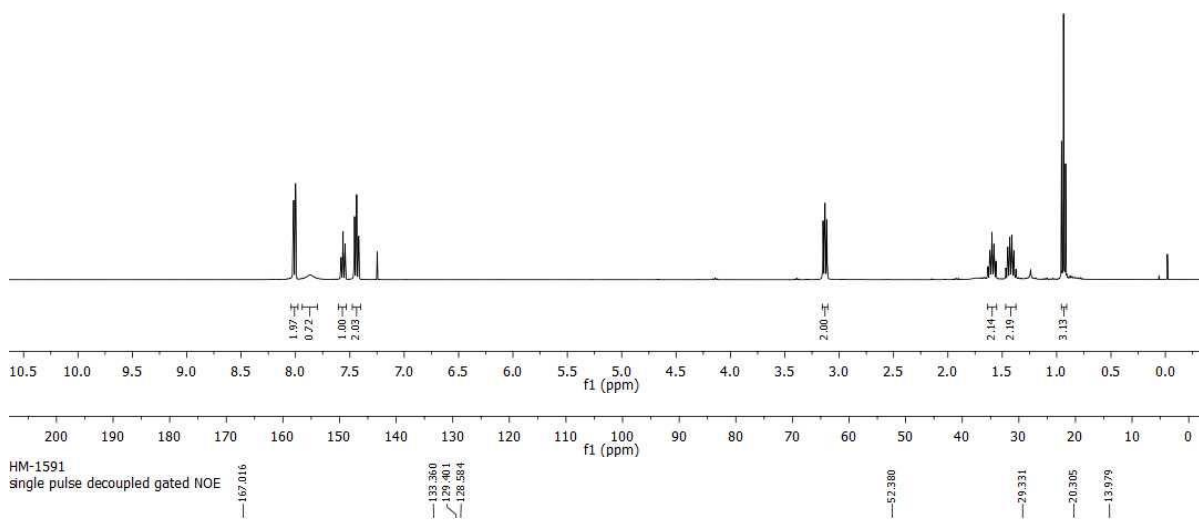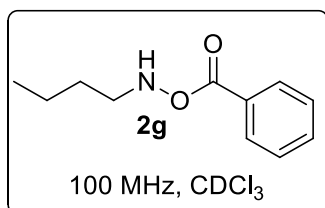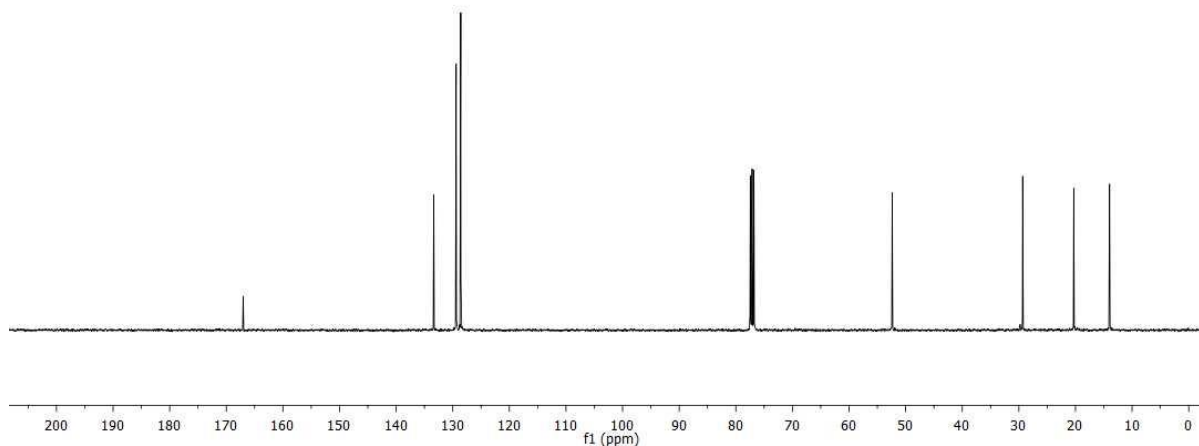

HM-1590  
single\_pulse

8.019  
8.014  
8.011  
8.007  
7.998  
7.993  
7.983  
7.863  
7.583  
7.579  
7.576  
7.566  
7.561  
7.544  
7.542  
7.539  
7.469  
7.465  
7.455  
7.417  
7.413

2.957  
2.940  
1.994  
1.981  
1.961  
1.944  
1.927  
1.910  
1.893  
1.009  
0.992

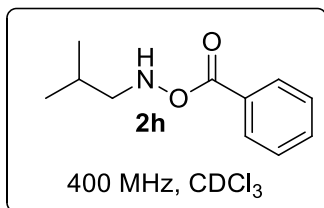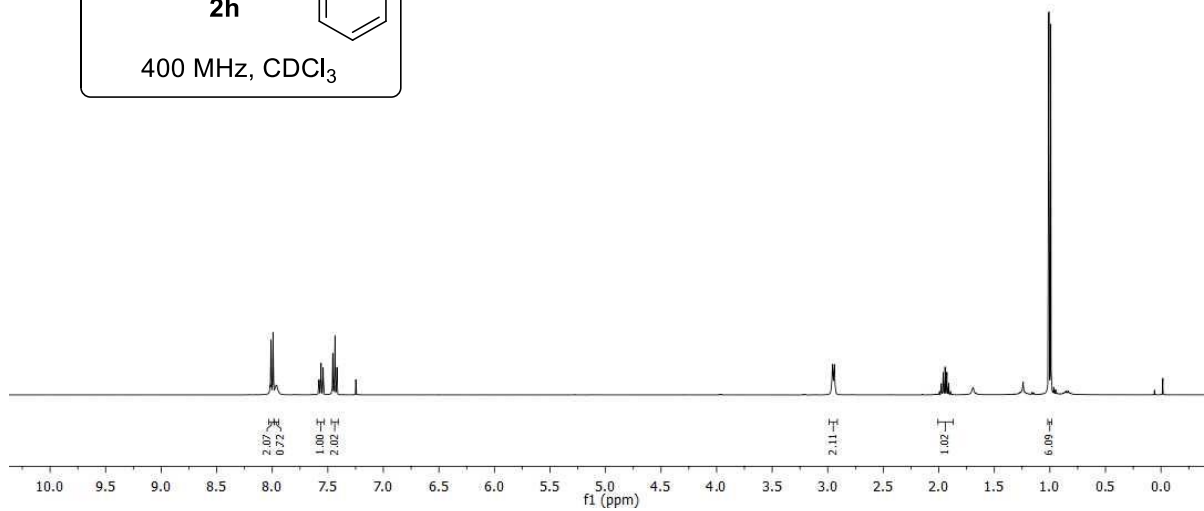

HM-1590  
single pulse decoupled gated NOE

166.964  
133.352  
129.388  
128.584  
60.214  
26.491  
20.646

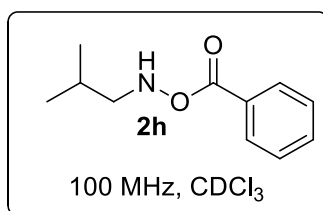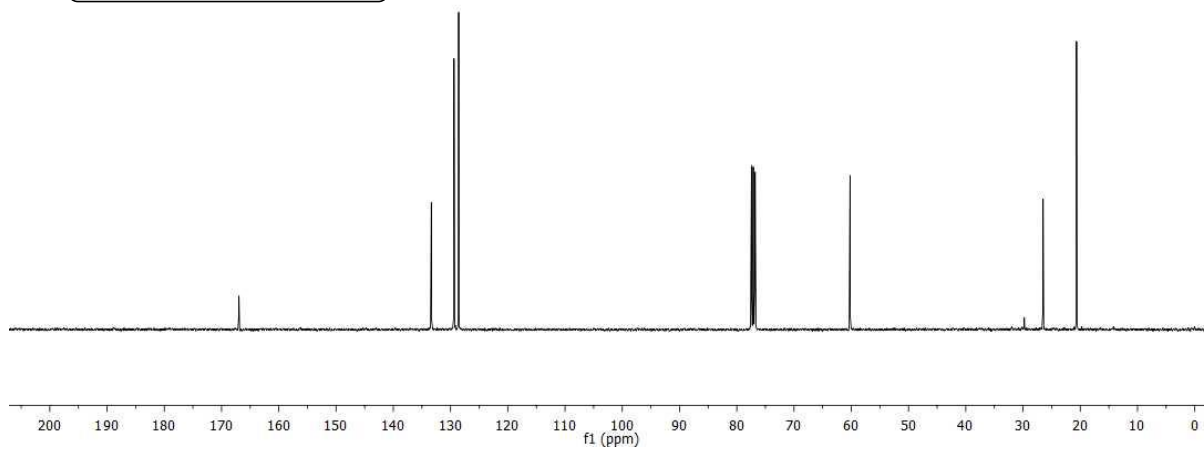

BHM-1588  
single\_pulse

8.026  
8.022  
8.019  
8.001  
7.997  
7.584  
7.581  
7.567  
7.562  
7.557  
7.547  
7.543  
7.540  
7.481  
7.488  
7.484  
7.441  
7.438  
7.420  
7.419  
7.416

3.170  
3.154  
3.138  
3.122  
3.086  
3.056

1.712  
1.693  
1.674  
1.644  
1.625  
1.606  
1.586  
1.483  
1.465  
1.448  
1.430  
1.412  
1.394  
1.376  
1.163  
1.095  
1.077  
1.058

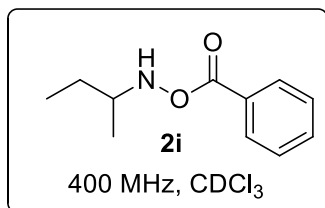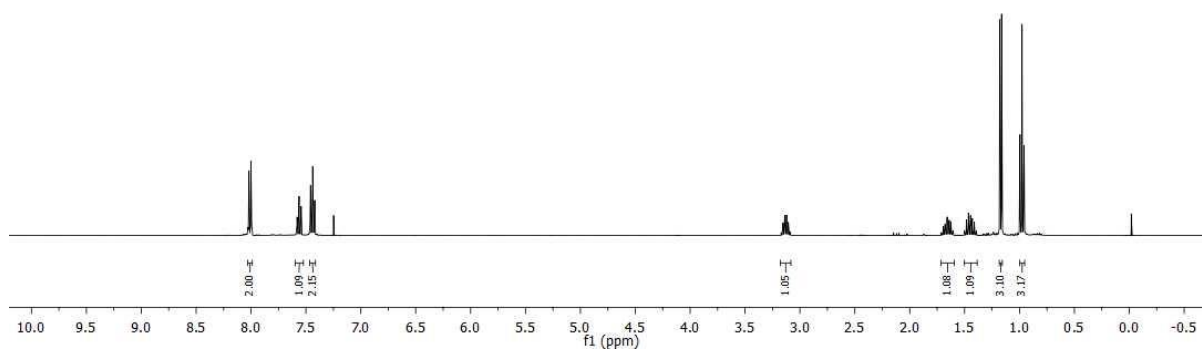

HM-1588  
single pulse decoupled gated NOE

-166.993

133.338

129.384

128.595

-58.220

-26.839

-17.558

-10.268

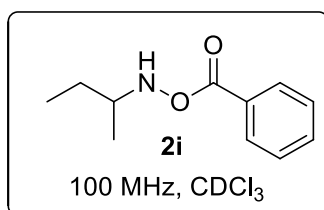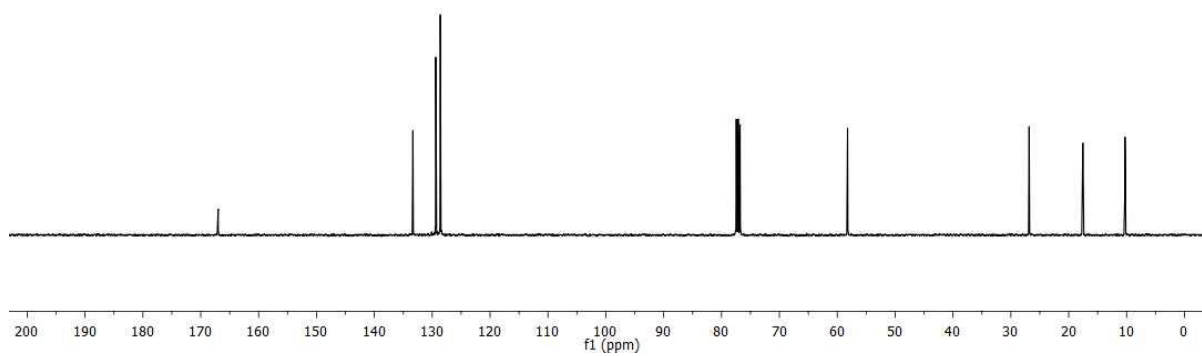

HM-1589  
single\_pulse

8.034  
8.030  
8.026  
8.014  
8.009  
8.001  
7.997  
7.588  
7.574  
7.569  
7.554  
7.550  
7.473  
7.469  
7.449  
7.435  
7.431

2.113  
1.768  
1.761  
1.714  
1.683  
1.651  
1.621

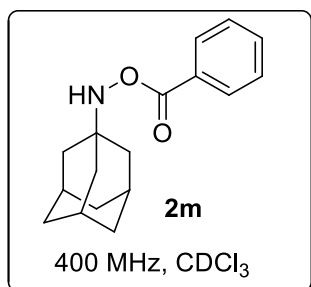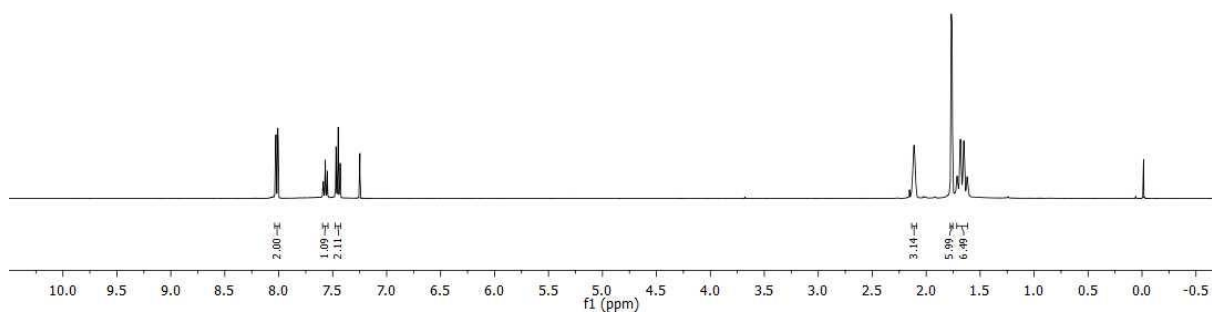

HM-1589  
single pulse decoupled gated NOE

167.019

133.265  
129.388  
128.064

56.440

40.129  
36.525

29.167

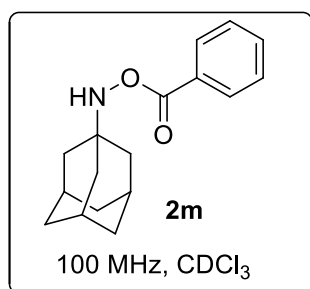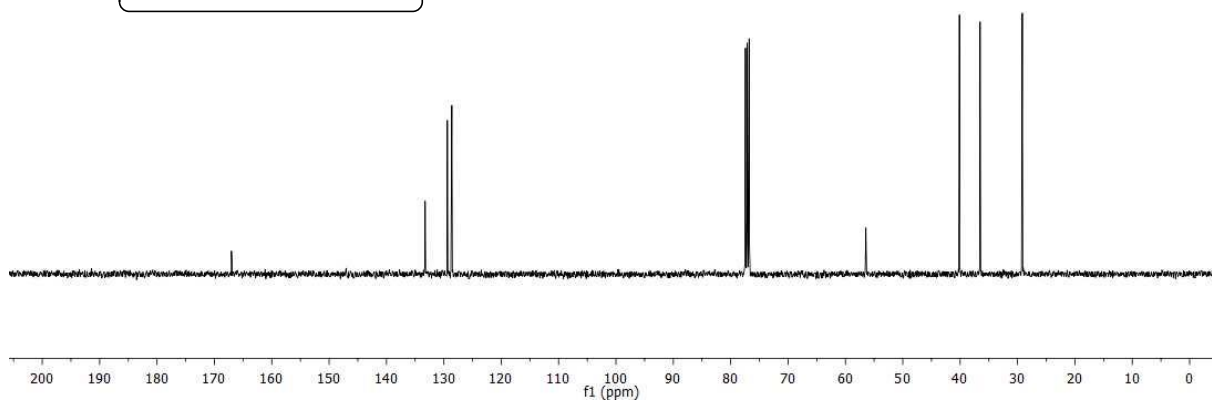

HM-1592  
single\_pulse

7.966  
7.962  
7.958  
7.940  
7.937  
7.557  
7.554  
7.555  
7.517  
7.513  
7.463  
7.449  
7.432  
7.414  
7.419  
7.400  
7.382  
7.364  
7.361  
7.346  
7.331  
7.317  
7.313  
7.305  
7.299  
7.292  
7.284  
7.277

1.555  
1.538  
1.515

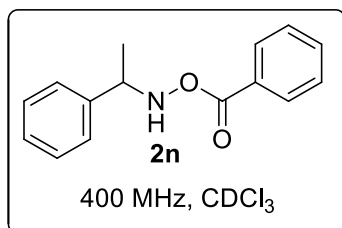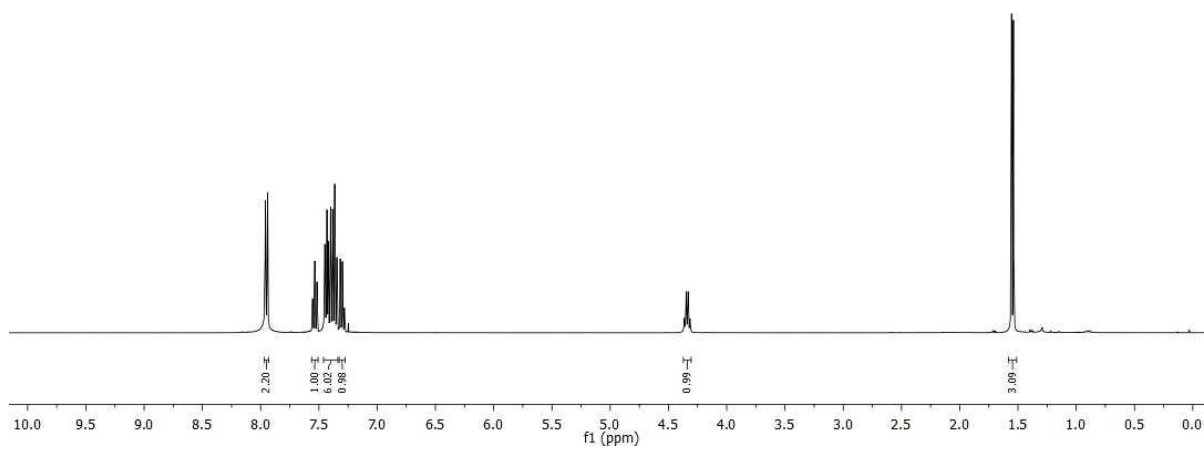

HM-1592  
single pulse decoupled gated NOE

166.914

141.336  
133.404  
129.417  
128.918  
128.908  
128.900  
127.984  
127.206

61.021

19.839

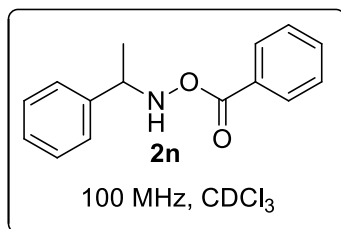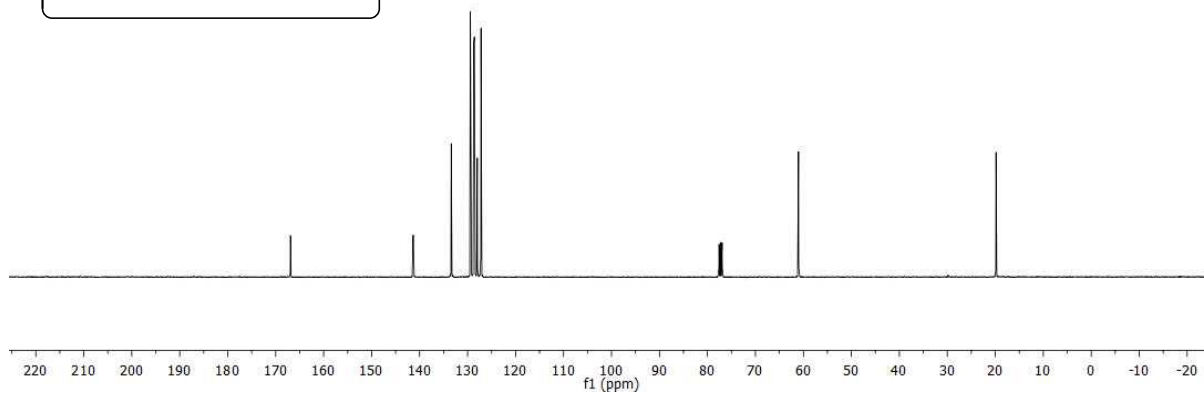

HM-345  
single\_pulse

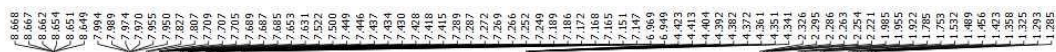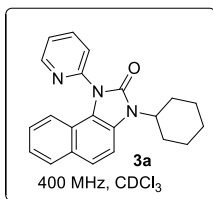

HM-345  
single pulse decoupled gated NOE

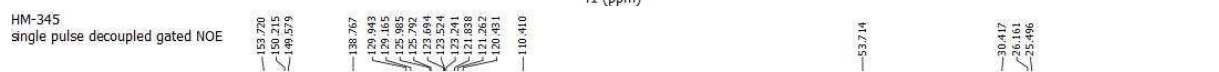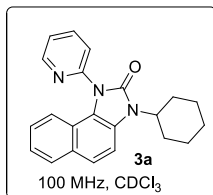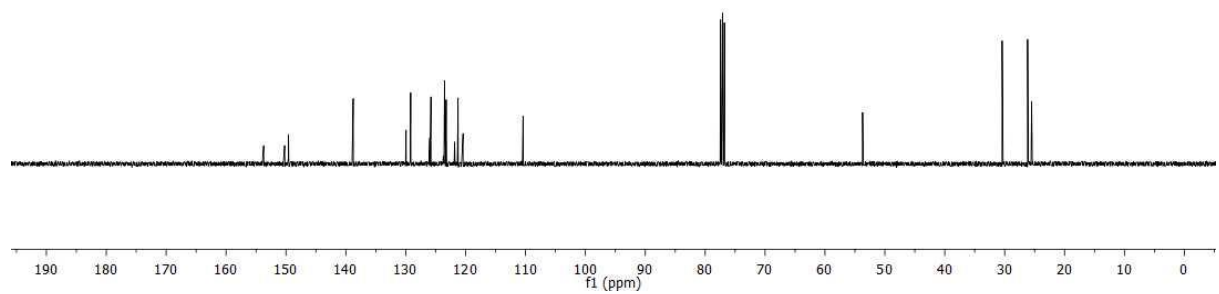

HM-388  
single\_pulse

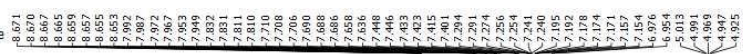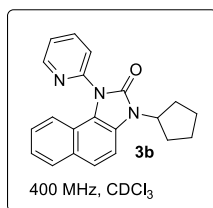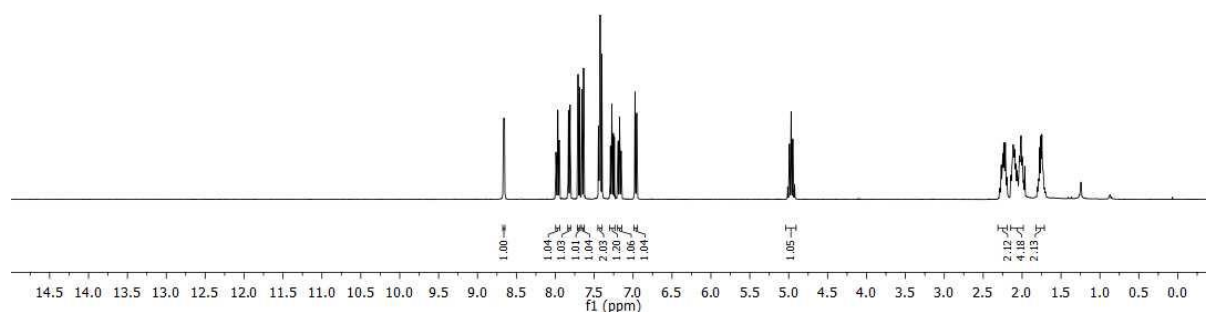

HM-388  
single\_pulse decoupled gated NOE

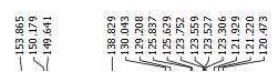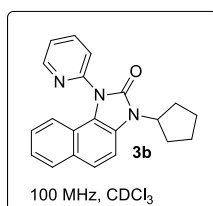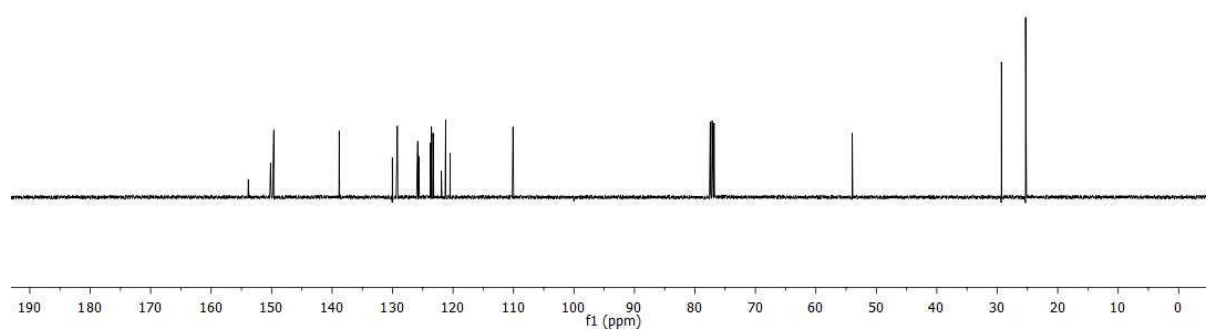

HM-580  
single\_pulse

8.667  
8.664  
8.663  
8.655  
8.650  
8.000  
7.995  
7.976  
7.961  
7.957  
7.950  
7.940  
7.715  
7.713  
7.691  
7.693  
7.654  
7.654  
7.449  
7.488  
7.480  
7.289  
7.271  
7.193  
7.191  
7.169  
7.165  
6.963  
4.620  
4.610  
4.592  
4.572  
4.555  
4.545  
2.374  
2.349  
2.342  
2.332  
2.073  
2.055  
2.048  
1.884  
1.868  
1.860  
1.795  
1.713  
1.689  
1.633  
1.633

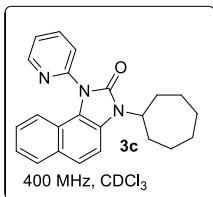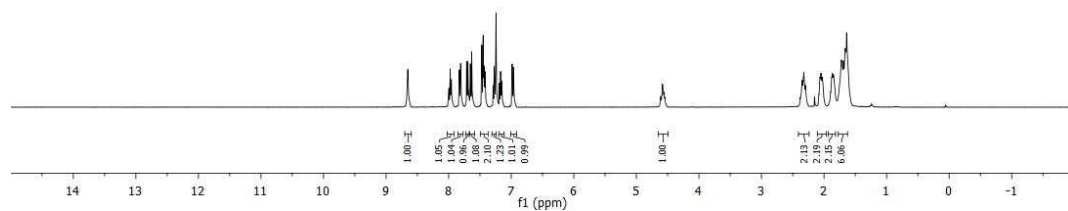

HM-580  
single pulse decoupled gated NOE

152.865  
150.871  
149.868  
138.817  
130.010  
129.197  
125.791  
125.775  
123.656  
123.498  
123.466  
123.301  
121.818  
121.818  
120.467  
110.493  
55.575  
32.972  
27.730  
25.865

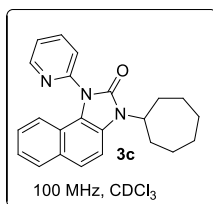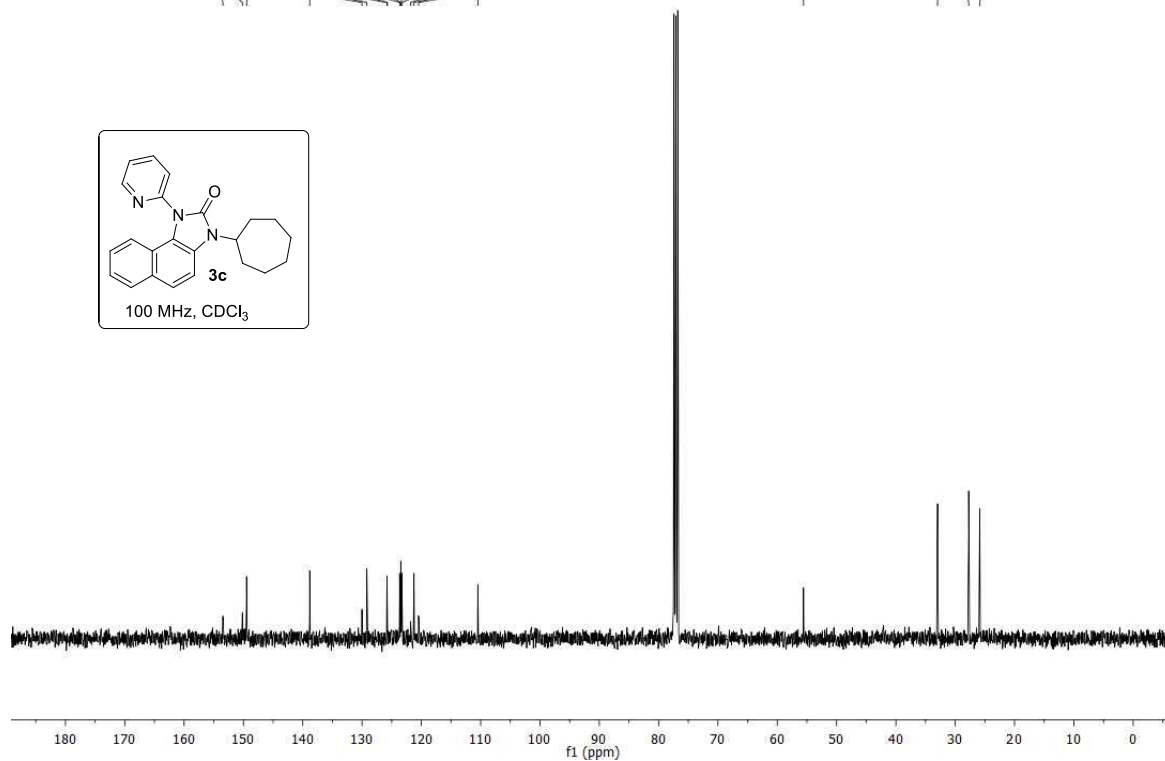



HM-581  
single\_pulse

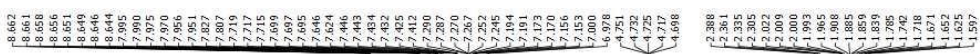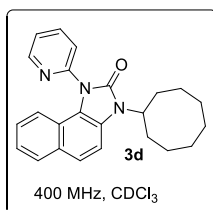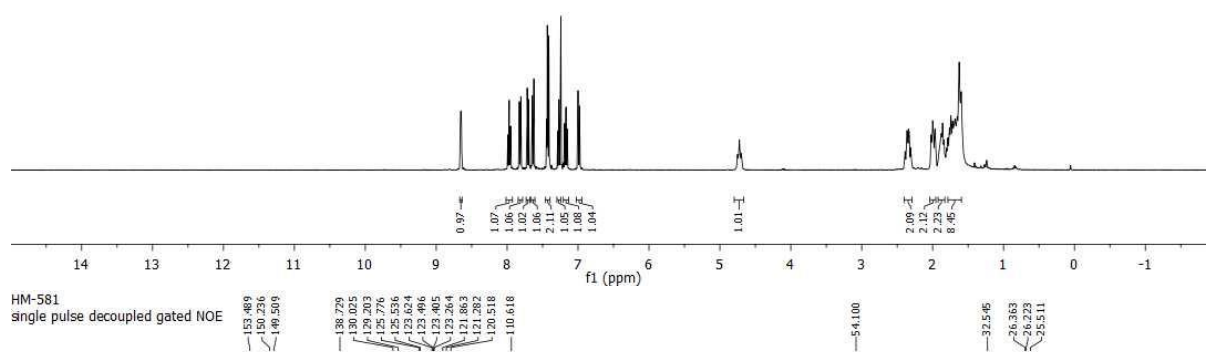

HM-581  
single\_pulse decoupled gated NOE

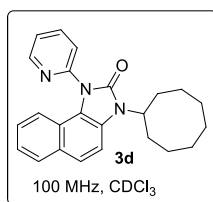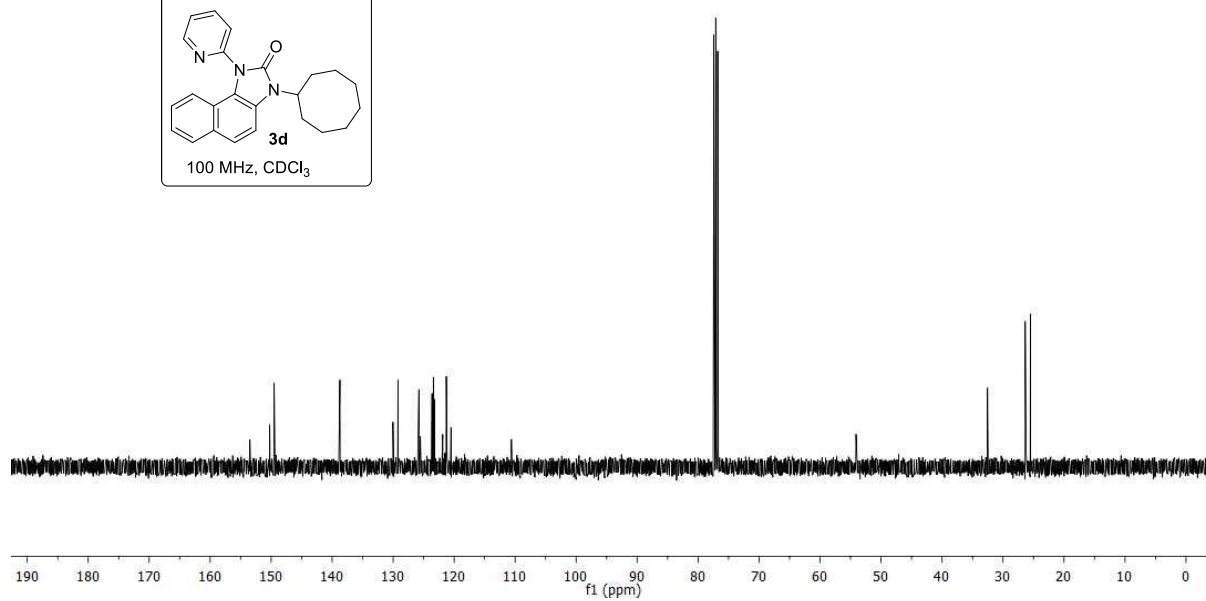

HM-427R  
single\_pulse

8.679  
8.677  
8.674  
8.673  
8.667  
8.665  
8.662  
8.661  
8.003  
7.998  
7.983  
7.978  
7.964  
7.964  
7.948  
7.938  
7.938  
7.723  
7.721  
7.719  
7.701  
7.686  
7.667  
7.465  
7.445  
7.443  
7.439  
7.436  
7.434  
7.434  
7.353  
7.332  
7.306  
7.303  
7.289  
7.286  
7.286  
7.265  
7.219  
7.216  
7.188  
7.184  
7.180  
7.057  
7.050  
7.007  
4.115  
4.087  
4.078  
4.060

1.446  
1.446

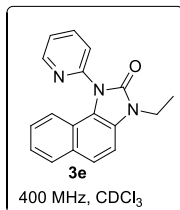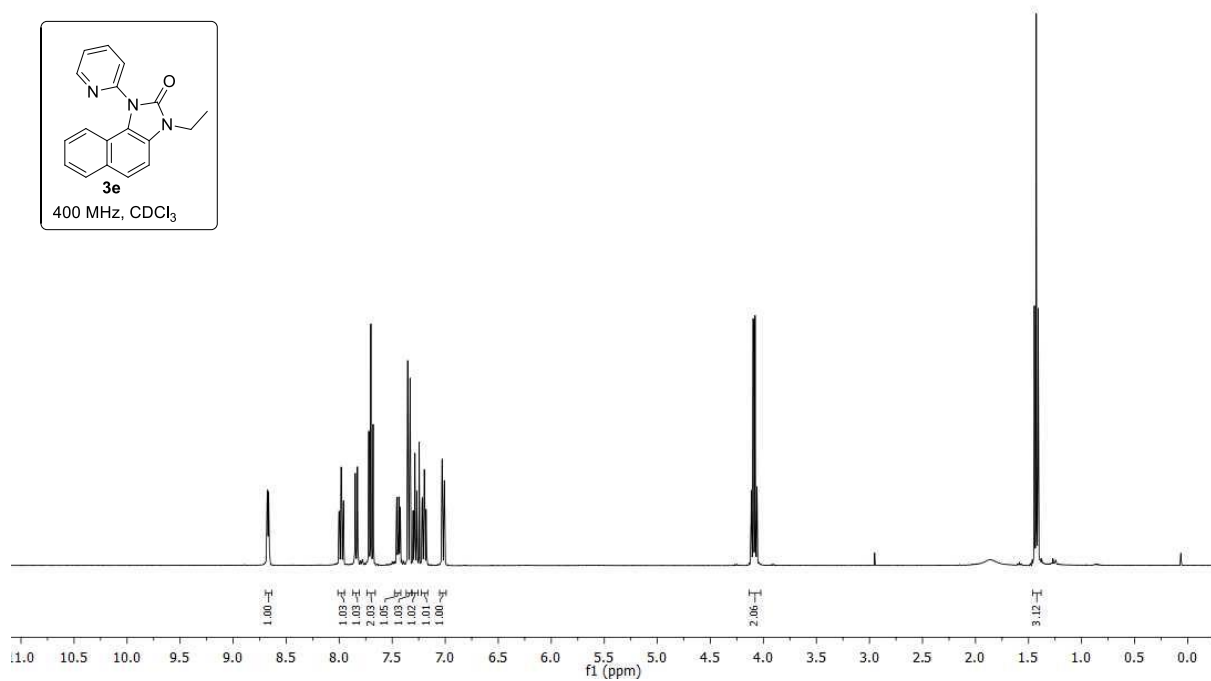

HM-427R  
single pulse decoupled gated NOE

153.877  
150.079  
149.572  
138.849  
130.386  
129.346  
128.203  
125.942  
123.813  
123.529  
123.362  
121.757  
121.235  
120.539  
108.974

36.337

13.973

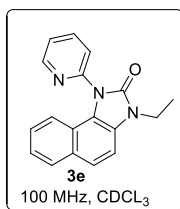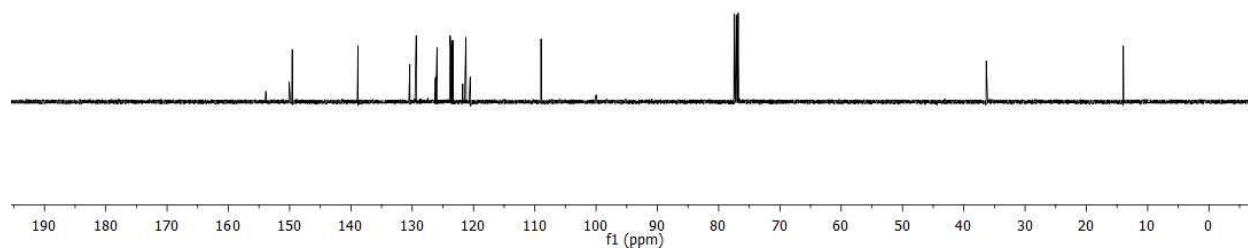

HM-431  
single\_pulse

8.664  
8.655  
7.988  
7.970  
7.960  
7.835  
7.814  
7.714  
7.695  
7.683  
7.661  
7.481  
7.437  
7.414  
7.336  
7.315  
7.292  
7.274  
7.255  
7.206  
7.186  
7.168  
7.025  
7.003

3.990  
3.981  
3.963

1.911  
1.893  
1.874  
1.856  
1.838  
1.820  
1.034  
1.015  
0.997

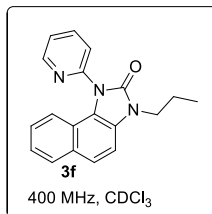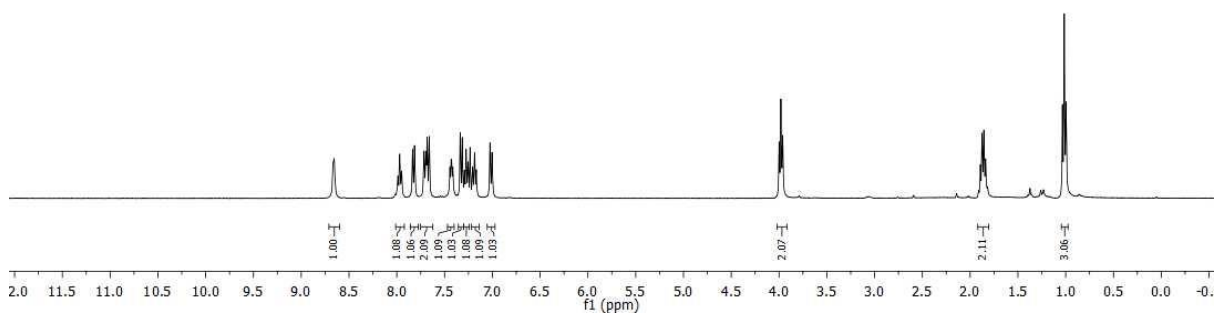

HM-431  
single pulse decoupled gated NOE

154.213  
150.099  
149.351  
138.004  
130.362  
129.322  
126.637  
125.925  
123.764  
123.515  
123.345  
121.664  
121.258  
109.145  
43.128  
22.066  
11.466

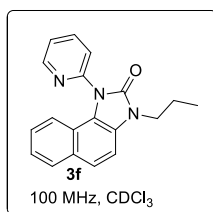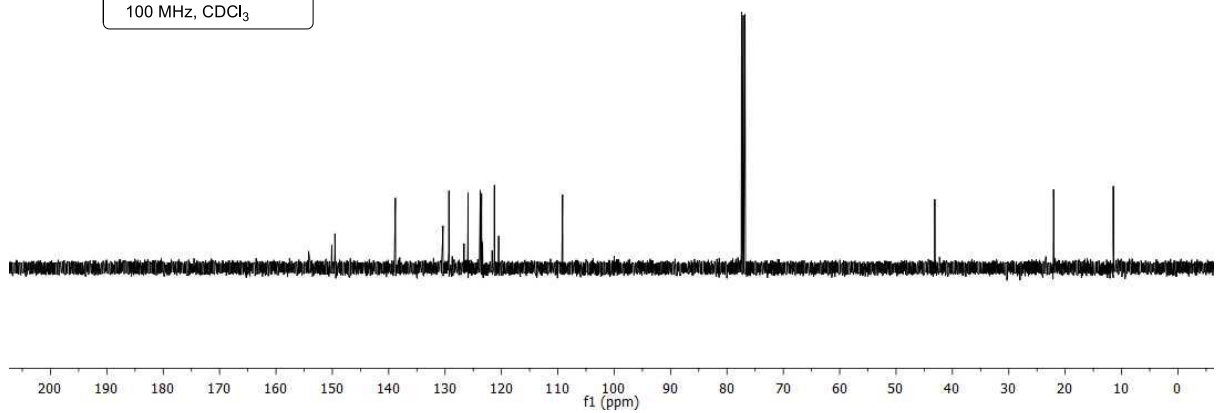

HM-368  
single\_pulse

7.465  
7.462  
7.462  
7.462  
7.484  
7.484  
7.481  
7.350  
7.328  
7.308  
7.305  
7.305  
7.298  
7.298  
7.294  
7.270  
7.267  
7.223  
7.219  
7.186  
7.184  
7.181  
7.043  
7.041  
7.039  
7.037  
7.031  
7.031  
7.017  
7.015

4.044  
4.026  
4.008

1.863  
1.830  
1.830  
1.826  
1.808  
1.788  
1.506  
1.487  
1.468  
1.468  
1.450  
1.412  
1.412  
1.0970  
1.0952

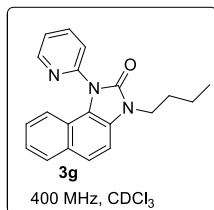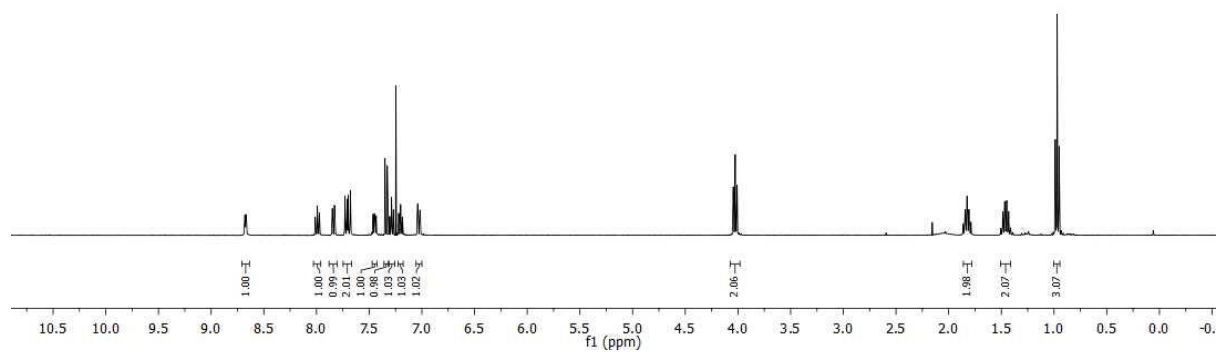

HM-368  
single\_pulse decoupled gated NOE

154.174  
150.065  
149.480  
138.861  
130.367  
129.337  
126.629  
125.938  
123.780  
123.521  
123.347  
121.661  
121.263  
120.508  
109.137  
41.336  
30.818  
20.222  
13.846

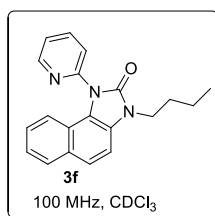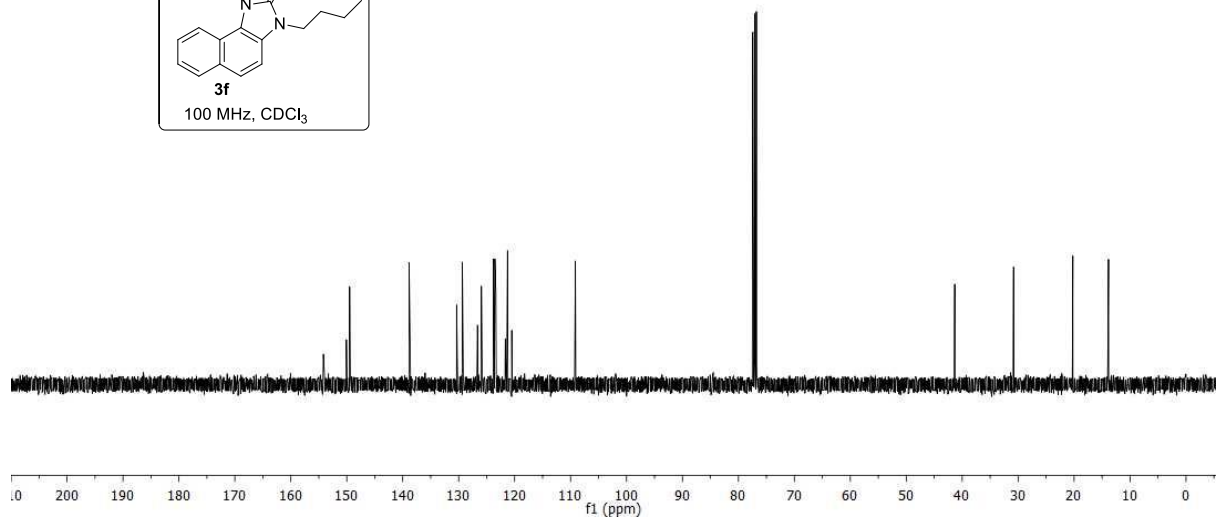

HM-590  
single\_pulse

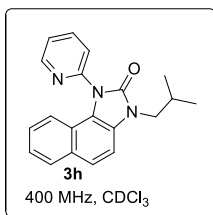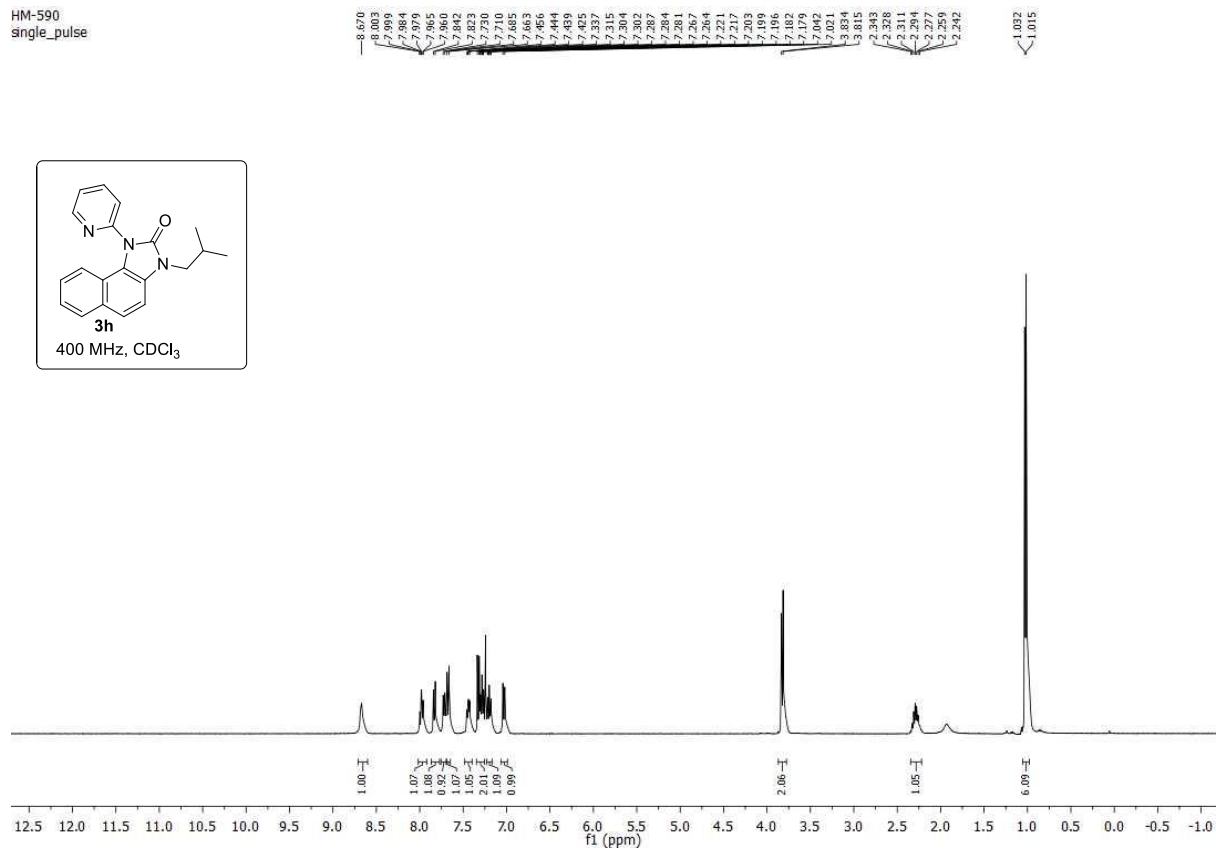

HM-590  
single pulse decoupled gated NOE

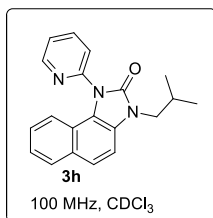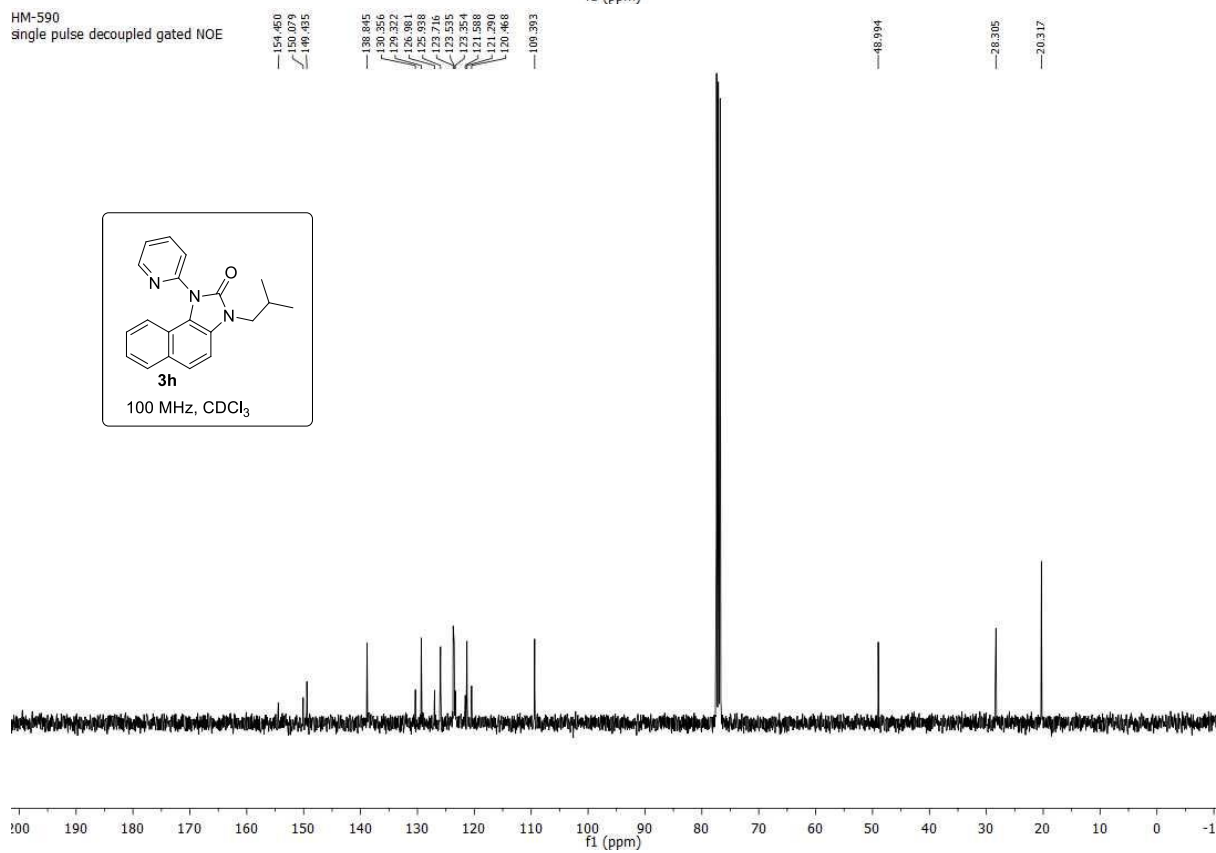

HM-592  
single\_pulse

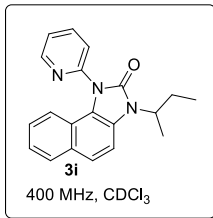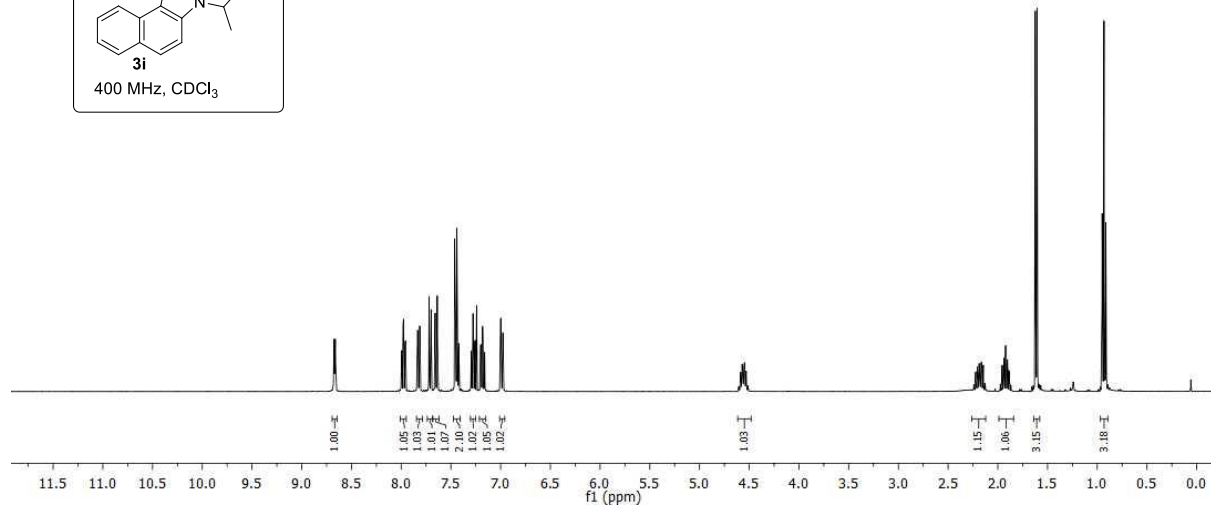

HM-592  
single pulse decoupled gated NOE

153.976  
150.147  
149.523  
139.839  
139.015  
129.203  
125.993  
125.838  
123.687  
123.566  
123.464  
123.386  
121.828  
121.274  
120.468  
110.206

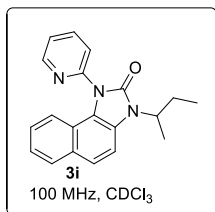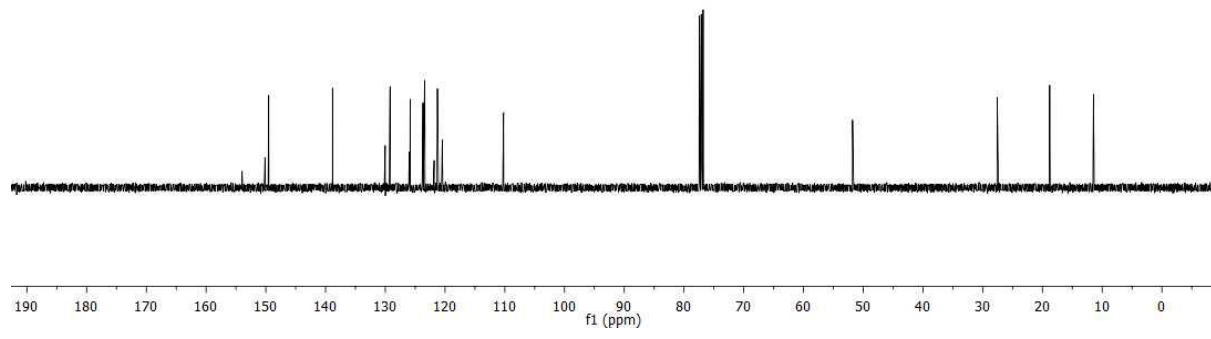

HM-434  
single\_pulse

8.872  
8.862  
8.850  
8.838  
8.827  
7.987  
7.967  
7.962  
7.948  
7.943  
7.936  
7.928  
7.758  
7.735  
7.666  
7.646  
7.592  
7.581  
7.451  
7.449  
7.439  
7.437  
7.431  
7.431  
7.423  
7.281  
7.266  
7.263  
7.245  
7.241  
7.153  
7.153  
7.136  
7.132  
7.128  
7.114  
7.111  
6.882  
6.846

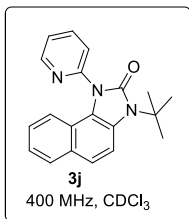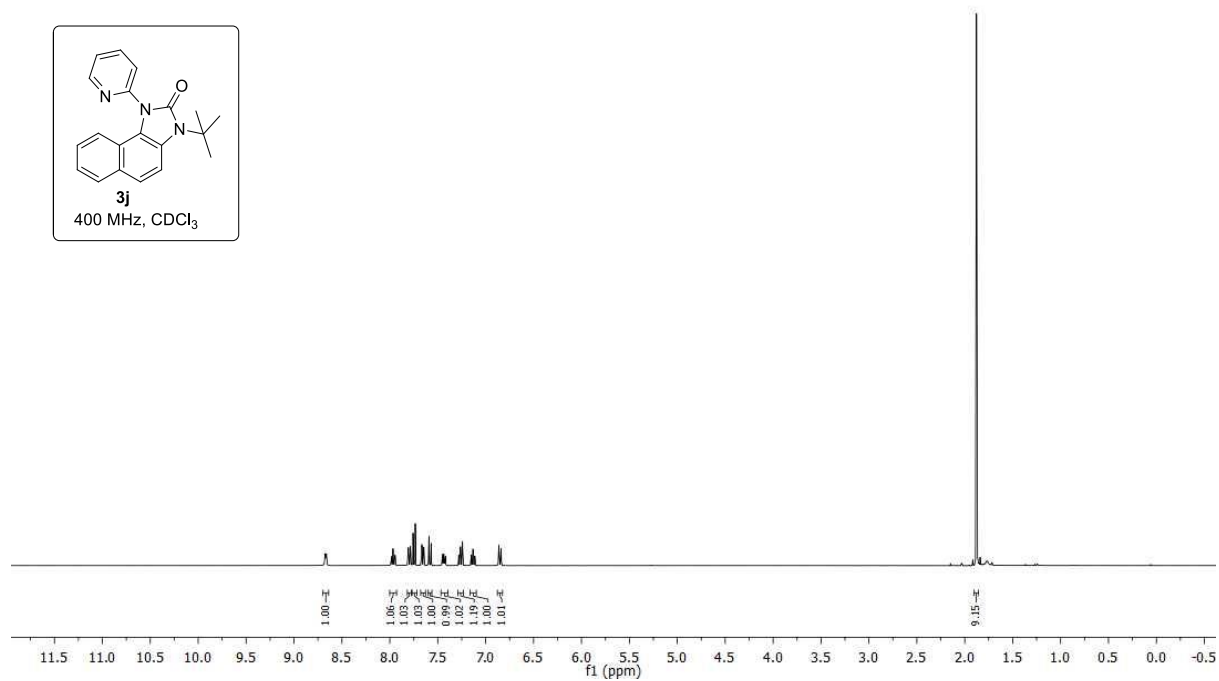

HM-434  
single pulse decoupled gated NOE

154.093  
150.423  
149.235  
139.706  
129.636  
128.852  
126.571  
125.646  
123.992  
123.793  
123.678  
123.570  
122.413  
121.296  
120.008  
113.059  
58.783  
29.871

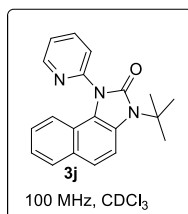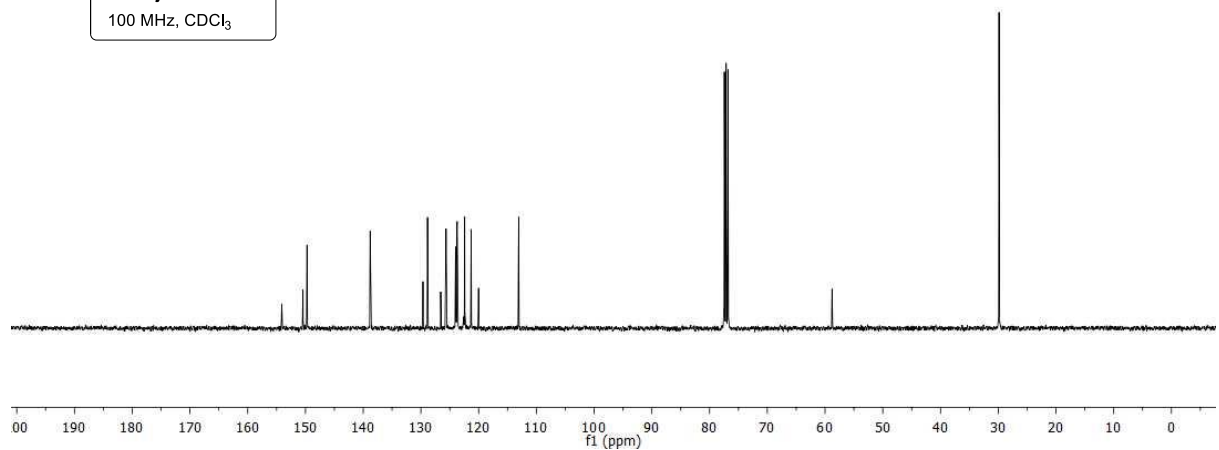

HM-393  
single\_pulse

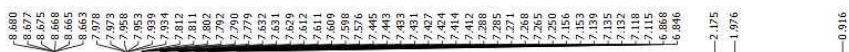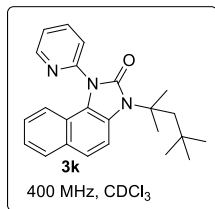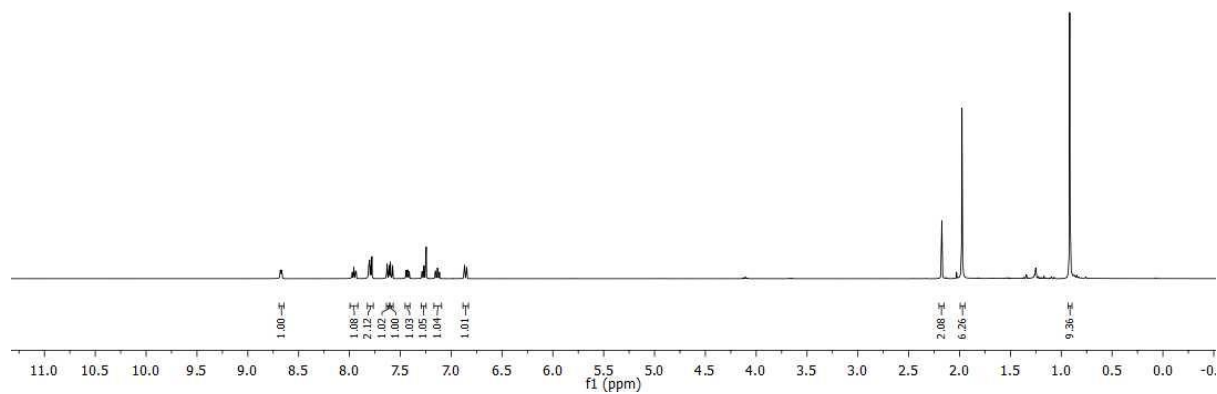

HM-393  
single pulse decoupled gated NOE

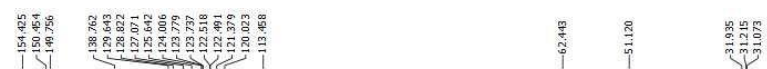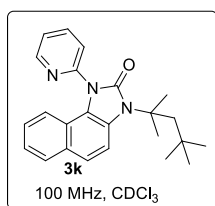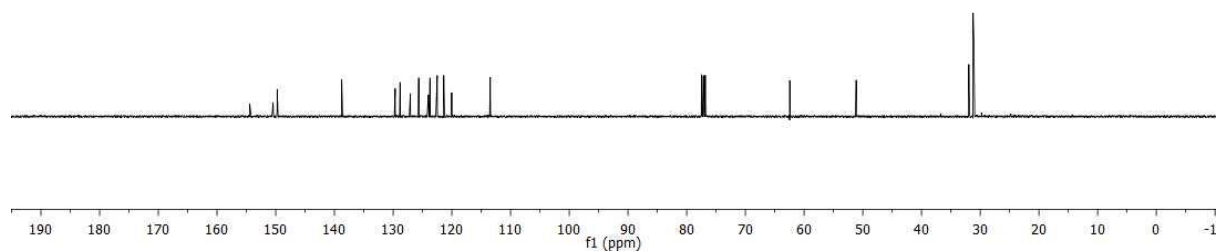



HM-591  
single\_pulse

8.686  
8.677  
8.002  
7.987  
7.983  
7.963  
7.843  
7.840  
7.823  
7.821  
7.806  
7.798  
7.718  
7.672  
7.651  
7.463  
7.460  
7.450  
7.444  
7.441  
7.432  
7.395  
7.373  
7.362  
7.302  
7.285  
7.281  
7.267  
7.264  
7.252  
7.218  
7.201  
7.197  
7.183  
7.180  
7.050  
7.048  
7.046  
7.043  
7.039  
7.037  
7.025  
7.023  
3.689

1.982  
1.788  
1.666  
1.626  
1.595

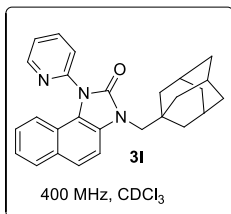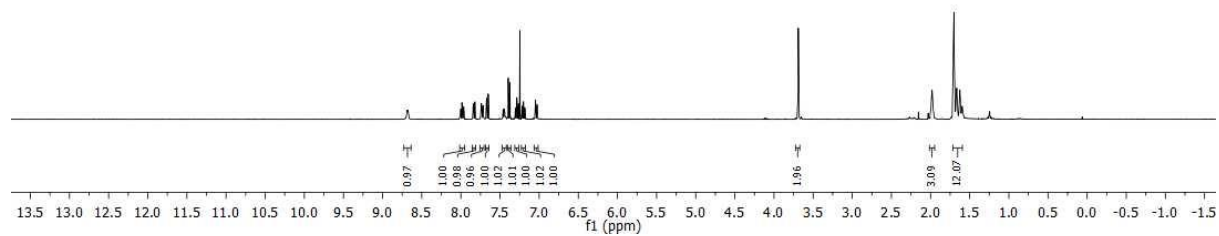

HM-591

single\_pulse decoupled gated NOE

155.183  
150.108  
149.398  
138.893  
130.313  
128.123  
125.916  
123.673  
123.666  
123.415  
121.586  
120.777  
120.319  
110.345

53.884

41.153

36.327

28.337

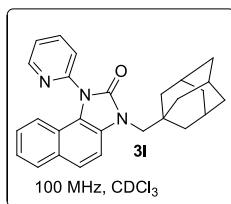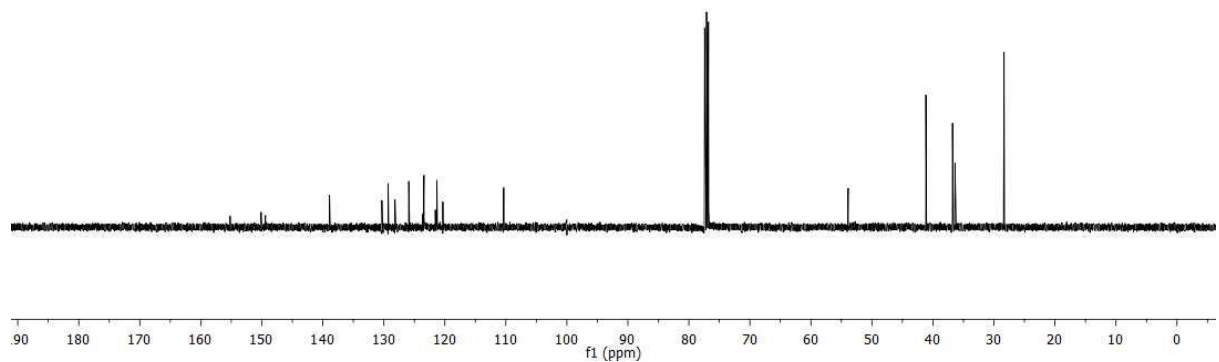

HM-594  
 single pulse  
 400 MHz, CDCl<sub>3</sub>

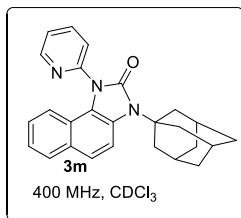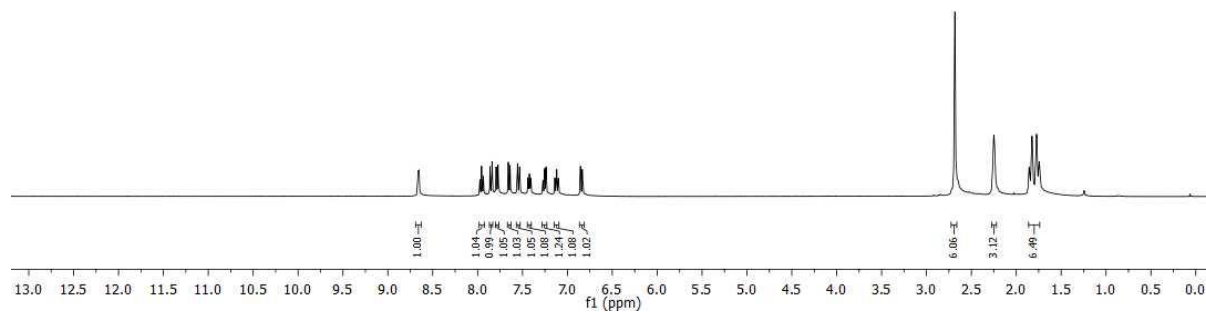

HM-594  
 single pulse decoupled gated NOE  
 151.031  
 150.476  
 149.219  
 138.884  
 138.579  
 138.281  
 126.306  
 125.559  
 124.003  
 123.727  
 123.670  
 122.880  
 122.879  
 121.845  
 120.945  
 113.576  
 61.123  
 40.962  
 36.305  
 30.085

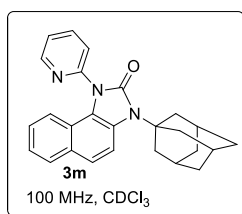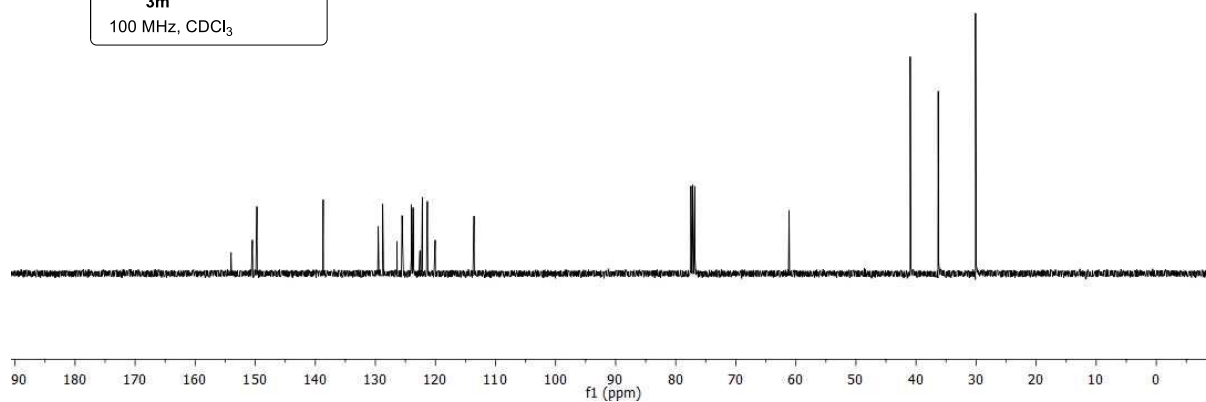





HM-657  
single\_pulse

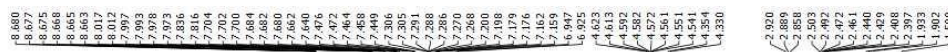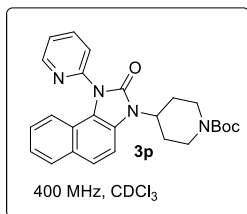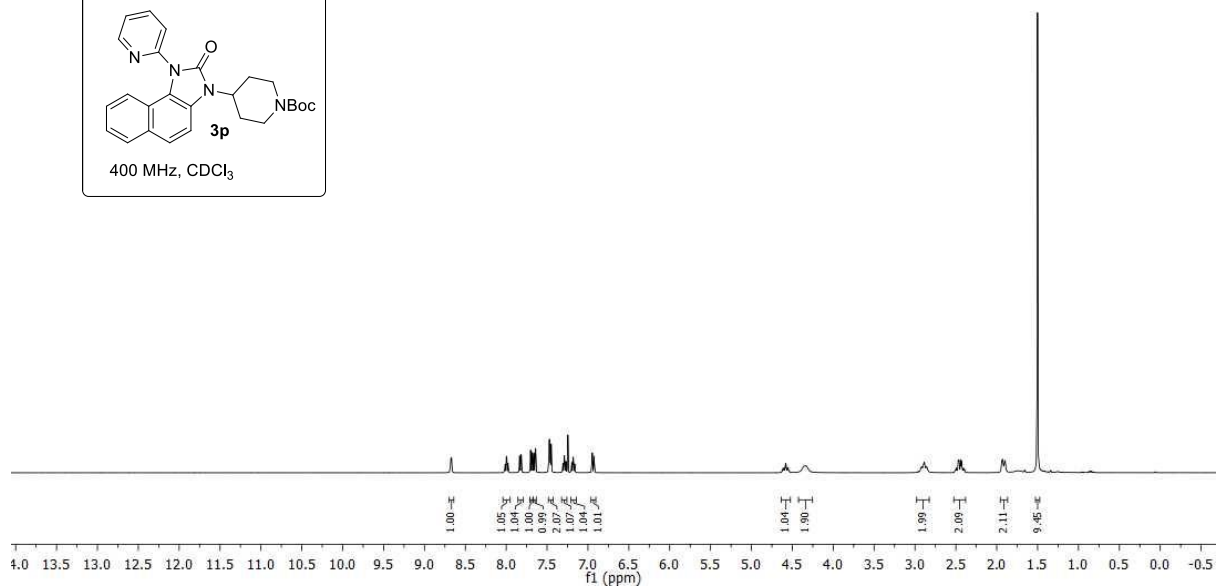

HM-657  
single\_pulse decoupled gated NOE

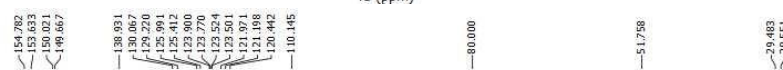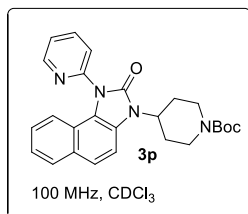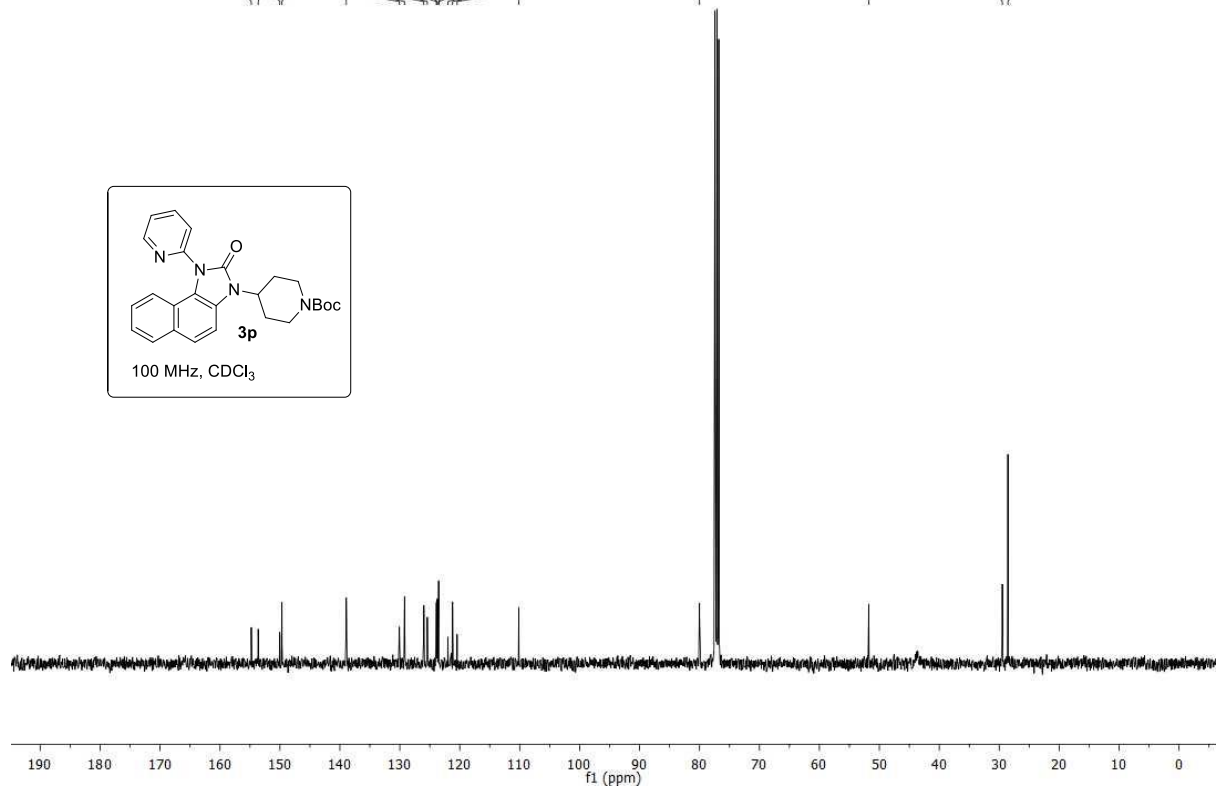

HM-404  
 Single pulse decoupled gated NOE  
 400 MHz, CDCl<sub>3</sub>

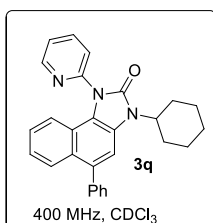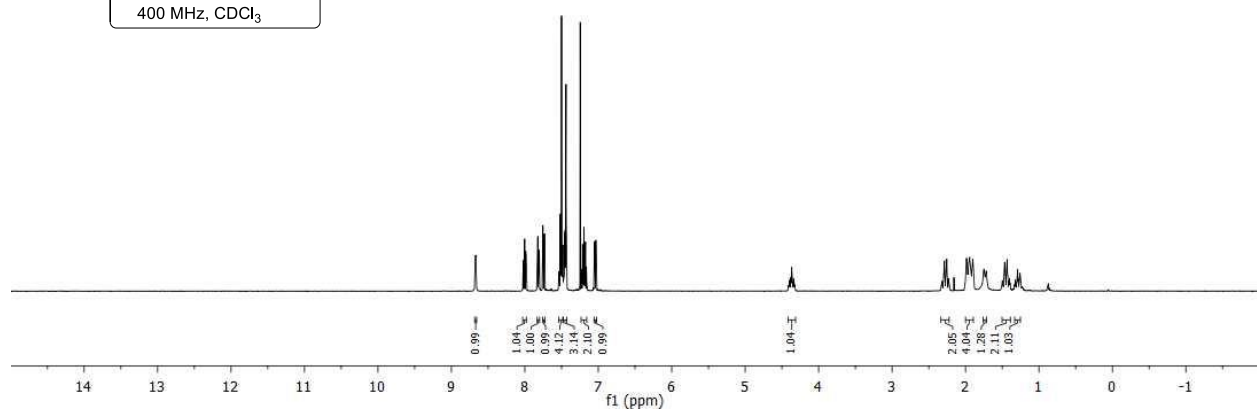

HM-404  
 Single pulse decoupled gated NOE

153.922  
 153.922  
 149.596  
 141.142  
 138.782  
 135.998  
 130.467  
 128.498  
 127.464  
 127.464  
 127.441  
 125.713  
 125.666  
 123.656  
 123.610  
 123.586  
 121.908  
 121.860  
 120.607  
 111.401  
 -53.822  
 30.305  
 28.133  
 25.302

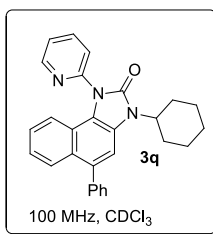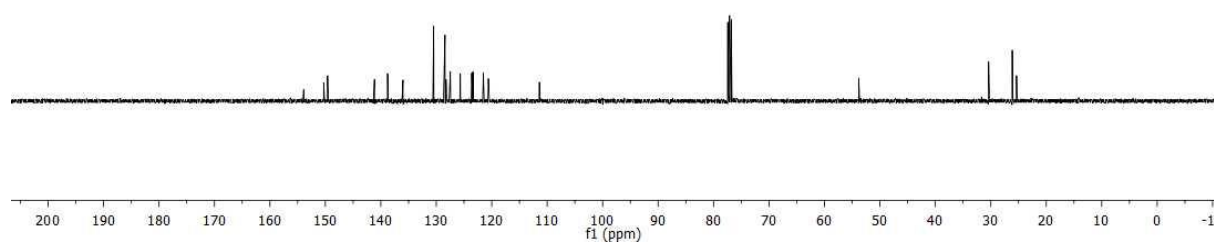

HM-411  
single pulse

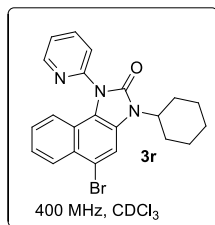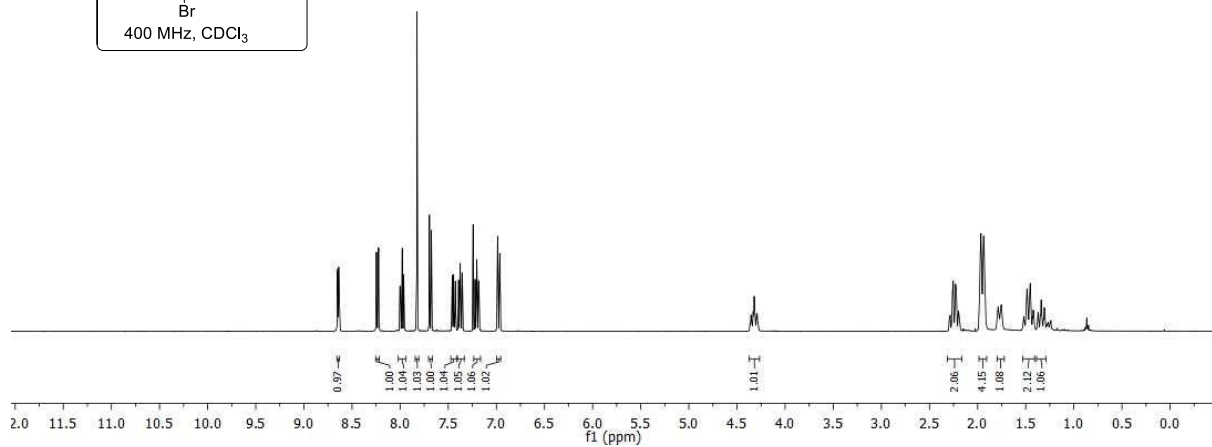

HM-411  
single pulse decoupled gated NOE

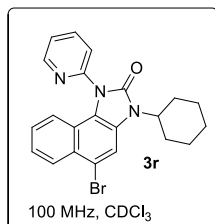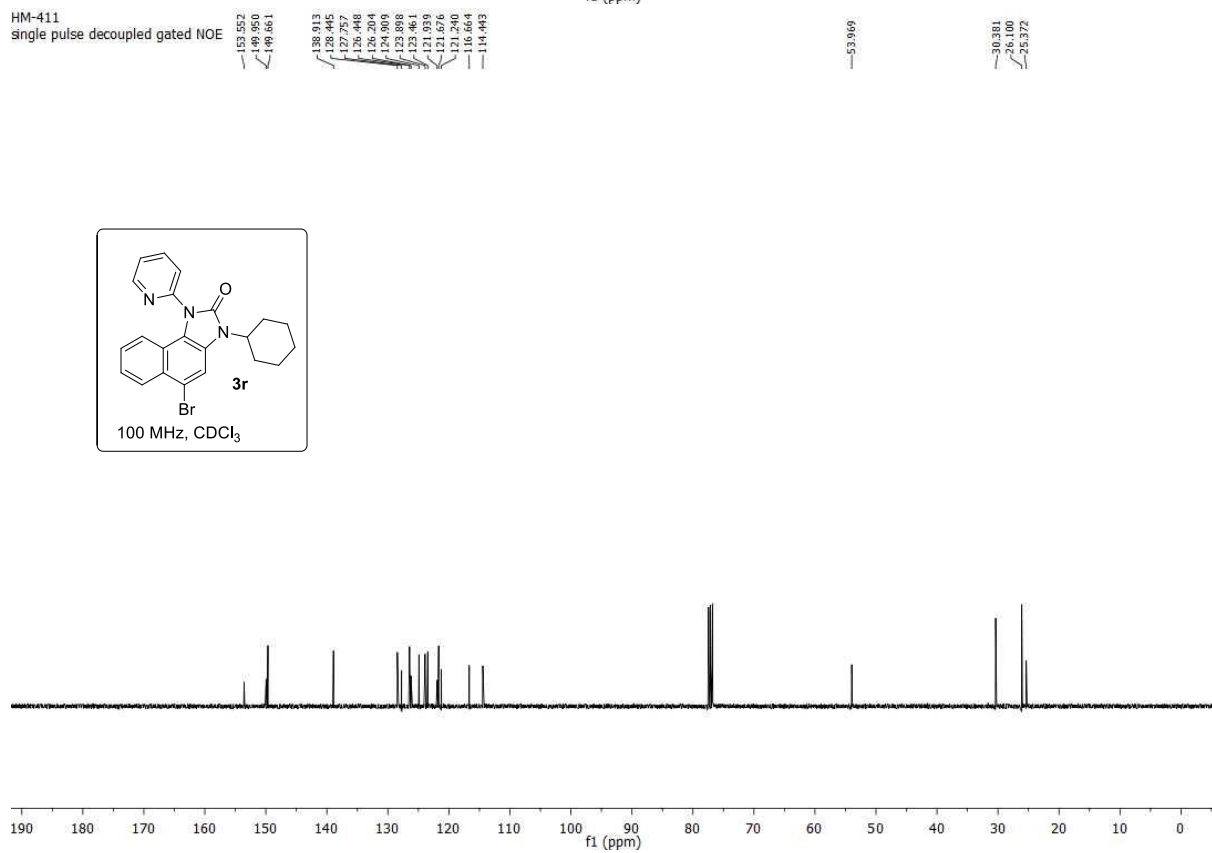







8.675  
8.671  
8.664  
8.659  
8.027  
8.022  
8.008  
8.003  
7.998  
7.984  
7.850  
7.849  
7.846  
7.844  
7.837  
7.825  
7.761  
7.759  
7.739  
7.736  
7.734  
7.719  
7.717  
7.714  
7.618  
7.541  
7.540  
7.539  
7.537  
7.521  
7.519  
7.517  
7.516  
7.481  
7.478  
7.468  
7.465  
7.463  
7.459  
7.450  
7.447  
7.295  
7.293  
7.277  
7.275  
7.271  
7.257  
7.254  
7.227  
7.224  
7.210  
7.203  
7.203  
7.189  
7.186  
7.048  
7.047  
7.046  
7.044  
7.037  
7.036  
7.034  
7.022  
6.564  
6.559  
6.553  
6.553  
6.278  
6.269  
6.247  
6.238  
6.215  
6.186  
6.186  
1.899  
1.887  
1.748  
1.716  
1.463  
1.461  
1.385  
1.383  
1.260

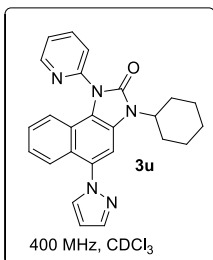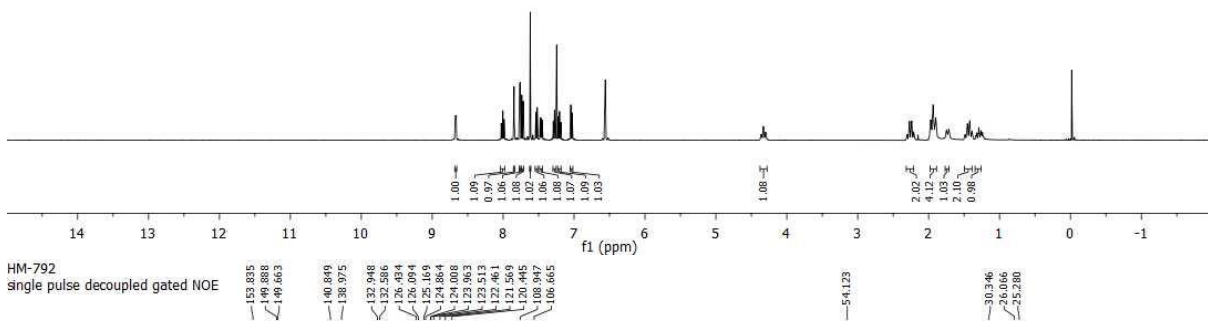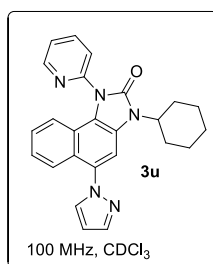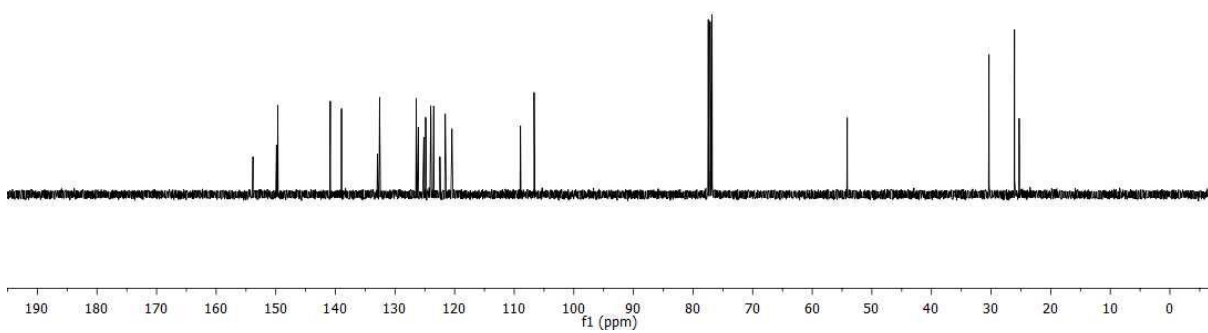

HM-826  
single\_pulse

8.654  
8.652  
8.650  
8.642  
8.640  
8.087  
8.085  
8.083  
8.002  
7.987  
7.982  
7.968  
7.963  
7.917  
7.715  
7.699  
7.697  
7.695  
7.454  
7.452  
7.433  
7.431  
7.348  
7.332  
7.330  
7.327  
7.300  
7.289  
7.263  
7.250  
7.228  
7.225  
7.225  
7.208  
7.000  
6.999  
6.978  
6.977  
6.975  
6.965  
4.363  
4.341  
4.332  
4.323  
4.301  
4.292  
4.277  
4.274  
2.232  
2.210  
2.201  
2.178  
2.168  
1.967  
1.937  
1.930  
1.792  
1.760  
1.530  
1.520  
1.492  
1.414  
1.363  
1.357  
1.325  
1.300  
1.285  
1.285

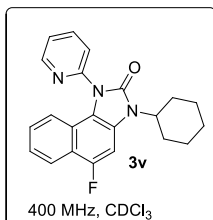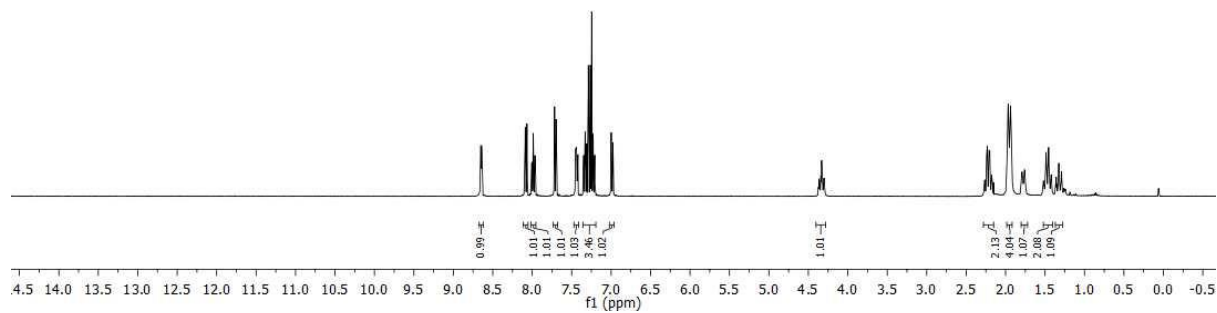

HM-826  
single pulse decoupled gated NOE

156.600  
154.243  
150.961  
149.964  
149.971  
138.871  
126.808  
125.270  
125.146  
123.711  
123.383  
121.705  
121.642  
121.249  
121.222  
120.866  
119.518  
119.506  
119.428  
117.919  
96.196  
93.919  
53.908  
30.341  
26.100  
25.428

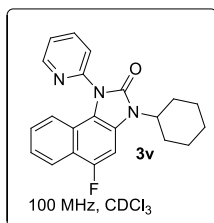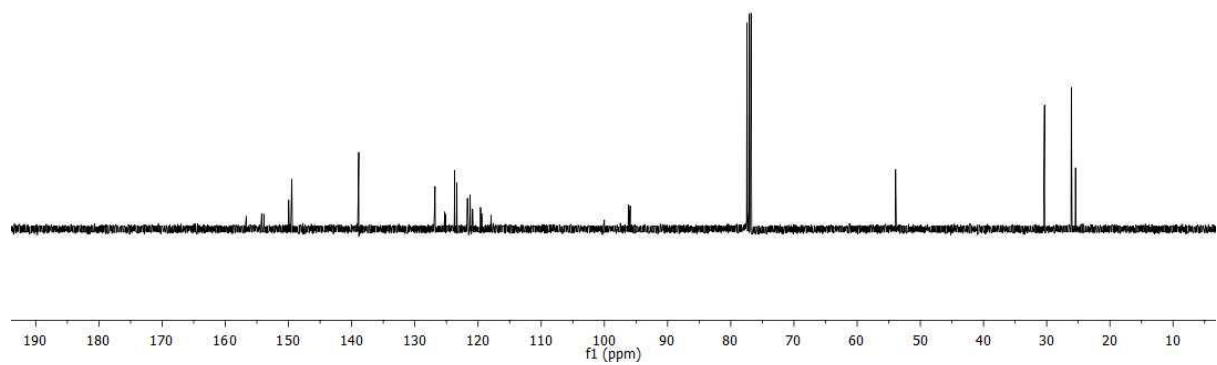

HM-826  
single pulse decoupled gated NOE

-127.038

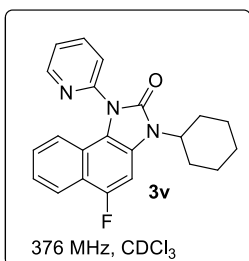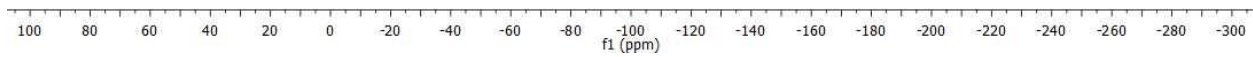

HM-825  
single\_pulse

8.655  
8.653  
8.650  
8.648  
8.643  
8.641  
8.638  
8.636  
8.634  
7.984  
7.979  
7.965  
7.960  
7.945  
7.940  
7.926  
7.699  
7.697  
7.681  
7.679  
7.677  
7.480  
7.478  
7.418  
7.415  
7.411  
7.409  
7.399  
7.397  
7.395  
7.341  
7.338  
7.324  
7.320  
7.316  
7.302  
7.299  
7.297  
7.204  
7.186  
7.182  
7.168  
7.165  
7.086  
7.084  
4.400  
4.391  
4.389  
4.380  
4.351  
4.329  
4.316

2.755  
2.336  
2.313  
2.304  
2.281  
2.272  
2.270  
1.975  
1.966  
1.940  
1.932  
1.924  
1.761  
1.531  
1.498  
1.465  
1.440  
1.425  
1.397  
1.315

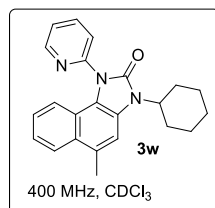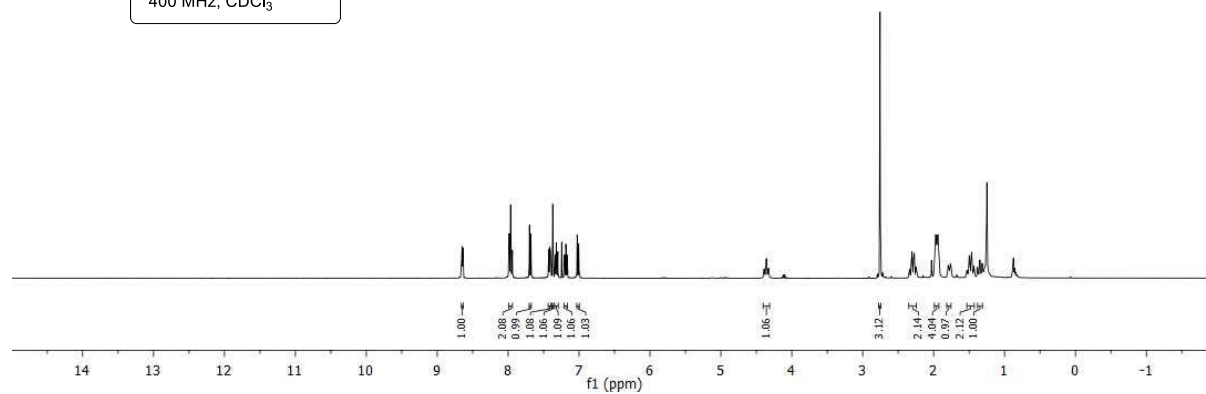

HM-825  
single pulse decoupled gated NOE

153.790  
150.383  
149.481  
138.761  
129.620  
128.748  
125.726  
125.518  
123.517  
123.399  
123.362  
121.770  
120.723  
120.462  
111.288  
53.664  
30.430  
26.182  
25.499  
20.317

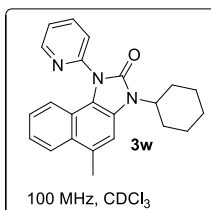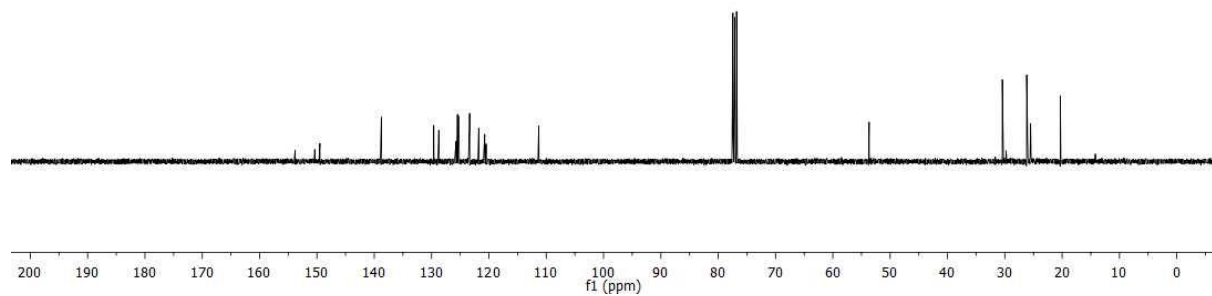

HM-810  
single\_pulse

8.325  
8.322  
8.313  
8.310  
7.895  
7.890  
7.875  
7.860  
7.857  
7.852  
7.786  
7.766  
7.688  
7.684  
7.668  
7.664  
7.464  
7.442  
7.240  
7.221  
7.208  
7.203  
7.195  
7.075  
4.381  
4.373  
4.364  
4.350  
4.341  
4.335  
4.330  
4.310  
4.303  
4.303  
2.339  
2.332  
2.309  
2.301  
2.299  
2.290  
2.286  
1.957  
1.929  
1.771  
1.760  
1.746  
1.577  
1.479  
1.446  
1.405  
1.386  
1.356  
1.324  
1.292  
1.284

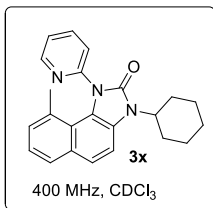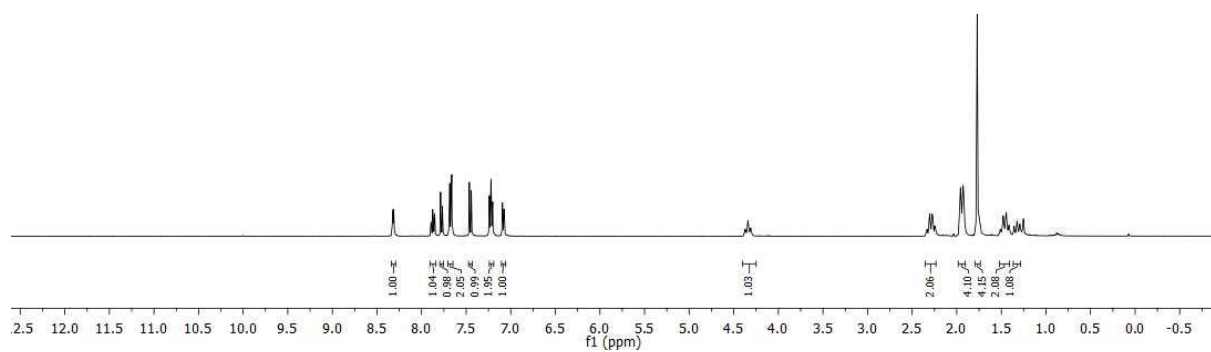

HM-810  
single pulse decoupled gated NOE

155.099  
153.339  
148.354  
138.729  
131.110  
131.022  
129.832  
129.801  
127.108  
125.305  
123.534  
123.168  
122.164  
122.113  
121.354  
109.749

53.946

30.192  
26.478  
21.691

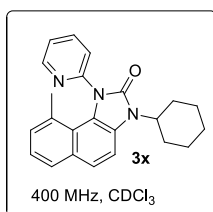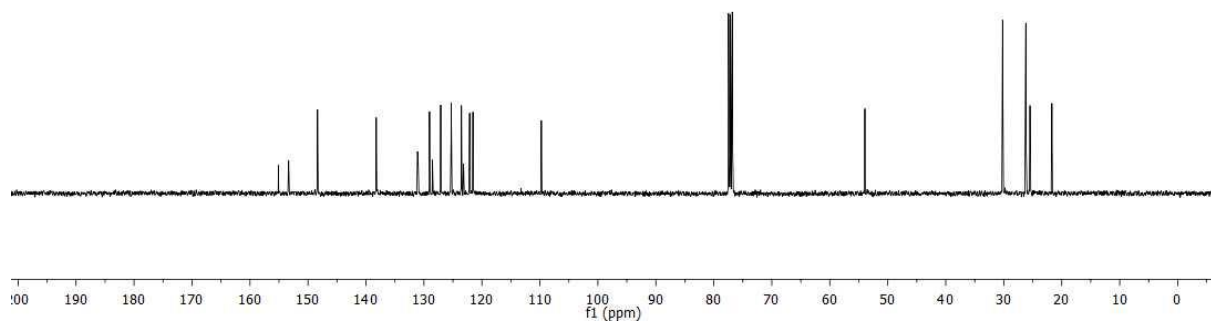



HM-412  
single\_pulse

8.779, 8.720, 8.637, 8.635, 8.632, 8.632, 8.625, 8.620, 8.469, 8.467, 8.006, 8.004, 8.001, 7.986, 7.986, 7.981, 7.967, 7.962, 7.960, 7.952, 7.950, 7.940, 7.739, 7.721, 7.717, 7.449, 7.449, 7.437, 7.430, 7.410, 7.110, 7.099, 7.088, 7.078, 4.424, 4.415, 4.415, 4.383, 4.383, 4.374, 4.362, 4.352, 4.343, 4.343, 2.397, 2.397, 2.284, 2.275, 2.252, 2.243, 2.243, 2.220, 2.210, 1.965, 1.965, 1.949, 1.940, 1.930, 1.922, 1.782, 1.782, 1.524, 1.524, 1.482, 1.482, 1.449, 1.449, 1.417, 1.417, 1.357, 1.357, 1.342, 1.342, 1.318, 1.318, 1.286, 1.286, 1.278, 1.278

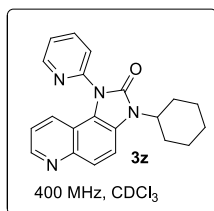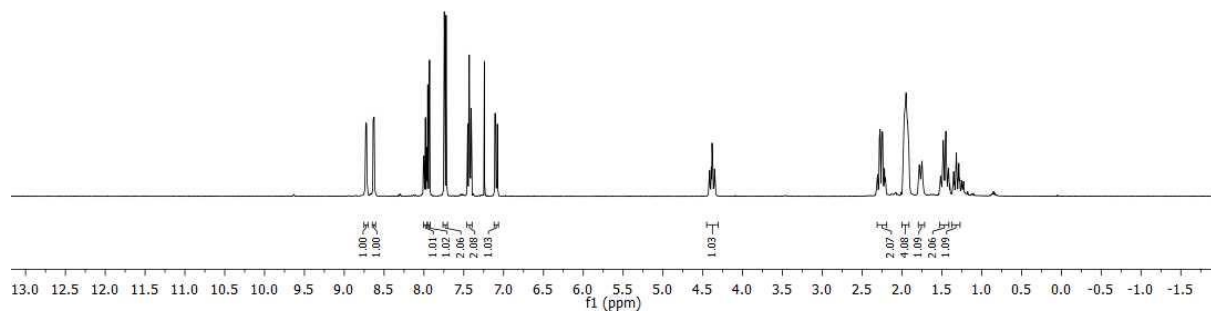

HM-412

single pulse decoupled gated NOE

153.673, 149.717, 149.480, 147.991, 144.558, 138.981, 129.730, 126.171, 124.637, 123.610, 123.170, 121.117, 120.194, 115.968, 113.494, 53.889, 30.206, 26.110, 25.422

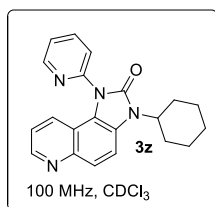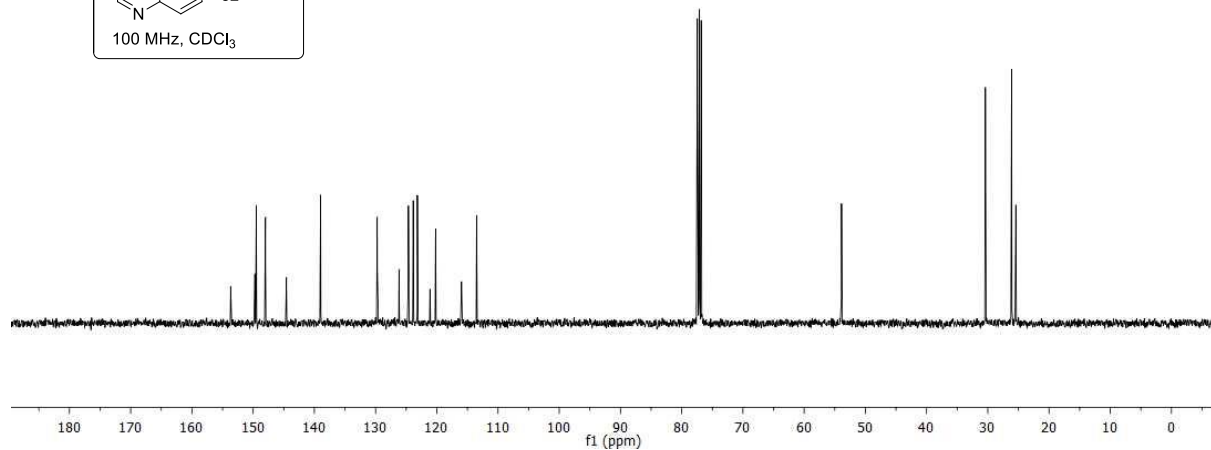





HM-405  
single\_pulse

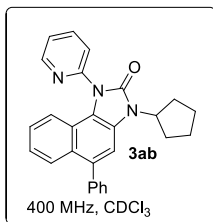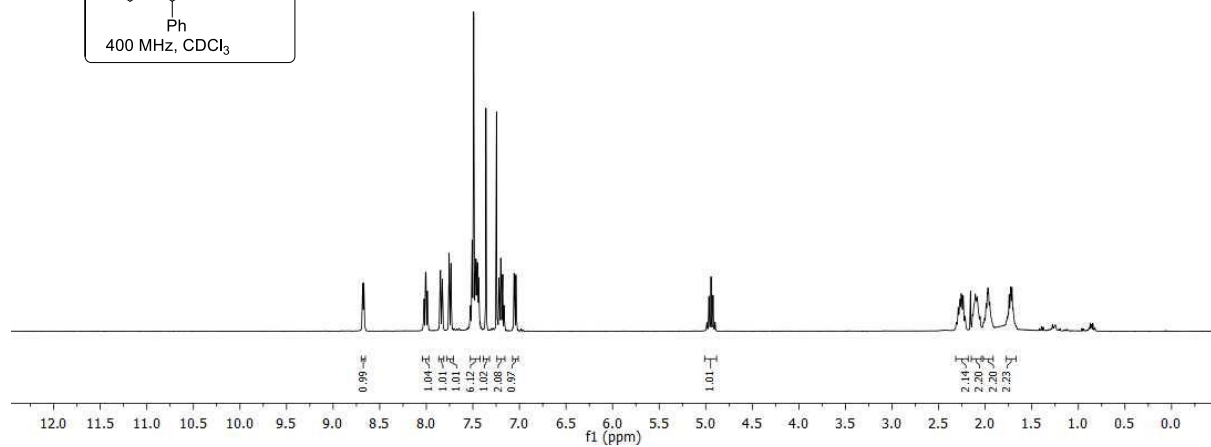

HM-405  
single pulse decoupled gated NOE

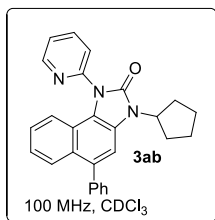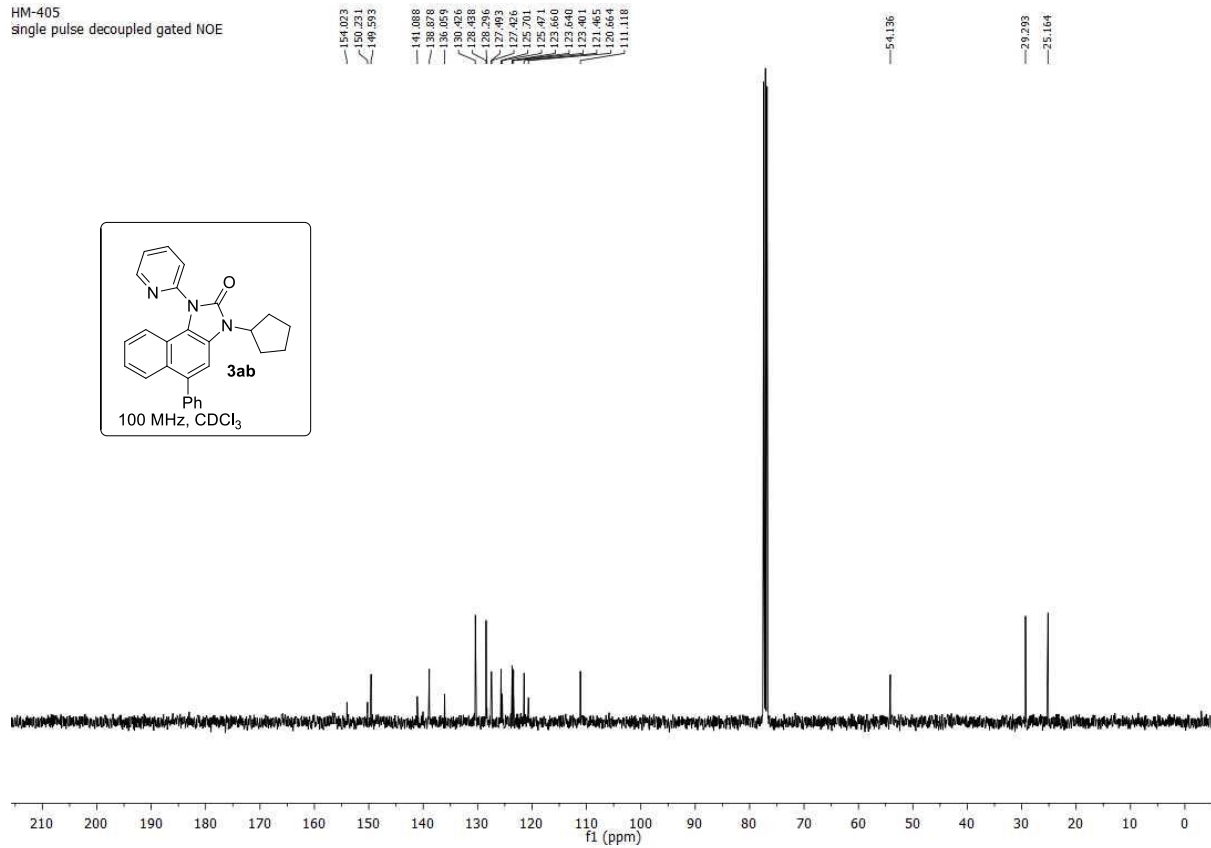

HM-582  
single\_pulse

8.574  
7.827  
7.818  
7.808  
7.798  
7.630  
7.616  
7.597  
7.536  
7.489  
7.427  
7.420  
7.408  
7.382  
7.362  
7.240  
7.224  
7.131  
7.126  
7.110  
7.083  
7.062  
6.987  
6.645  
6.623

4.488  
4.481  
4.418  
4.409  
4.400  
4.388  
4.378  
4.369

2.300  
2.262  
2.254  
2.230  
1.986  
1.962  
1.934  
1.927  
1.755  
1.527  
1.503  
1.496  
1.466  
1.457  
1.370  
1.363  
1.355  
1.330  
1.323  
1.290  
1.271

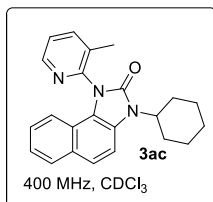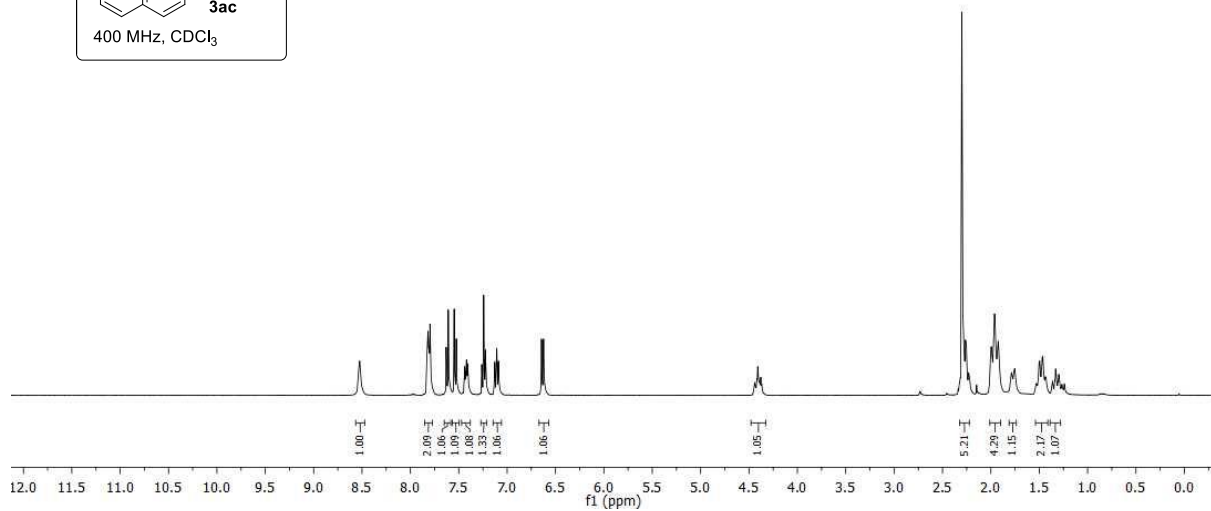

HM-582  
single\_pulse decoupled gated NO

155.865  
140.324  
147.628  
140.416  
133.376  
129.720  
129.136  
126.114  
125.782  
123.781  
123.884  
122.614  
122.108  
120.289  
119.981  
110.629

53.546

30.639  
30.478  
26.153  
25.507

17.493

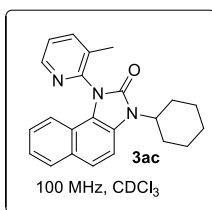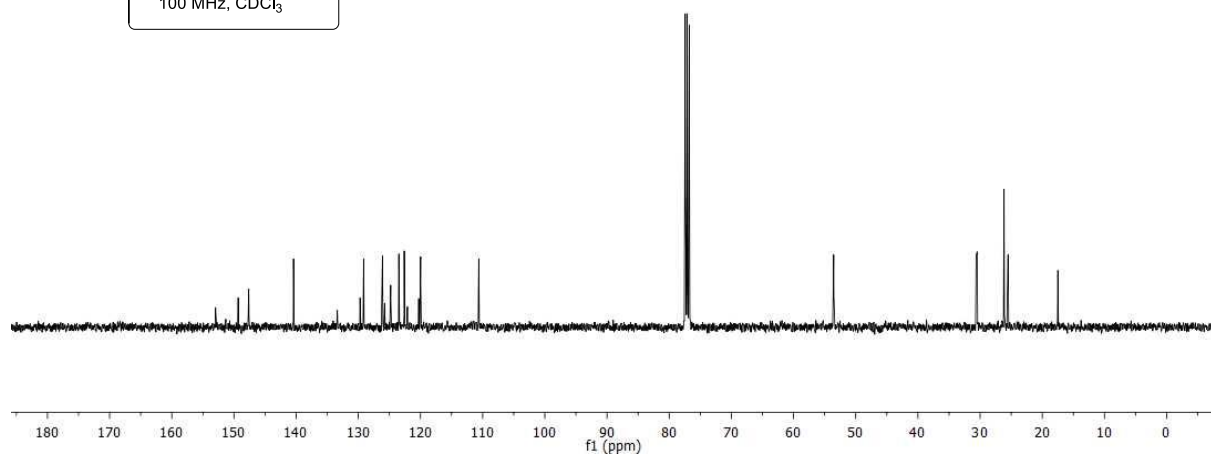



HM-584  
single\_pulse

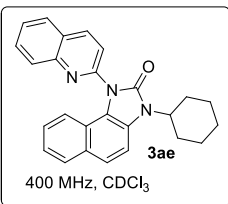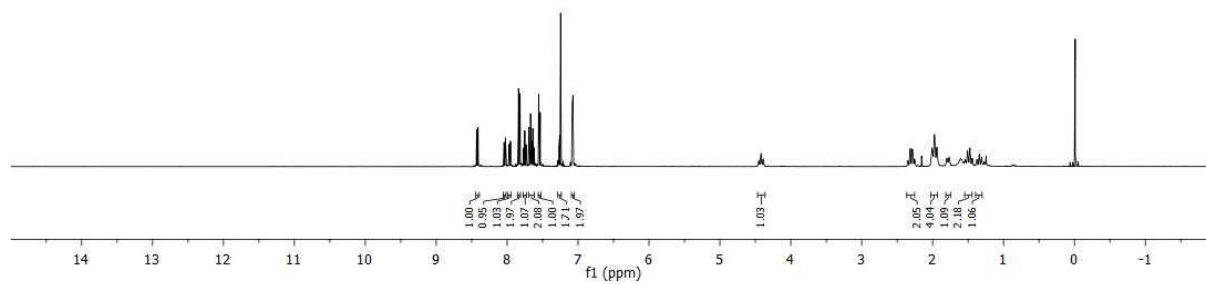

HM-584  
single pulse decoupled gated NOE

153.765, 149.618, 147.262, 138.906, 130.276, 130.037, 129.317, 129.317, 127.843, 127.752, 127.351, 126.276, 125.690, 123.529, 121.766, 121.686, 121.139, 120.646, 110.445, 53.693, 30.417, 26.172, 25.500

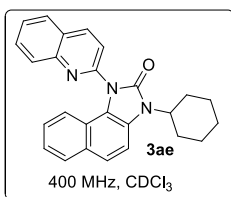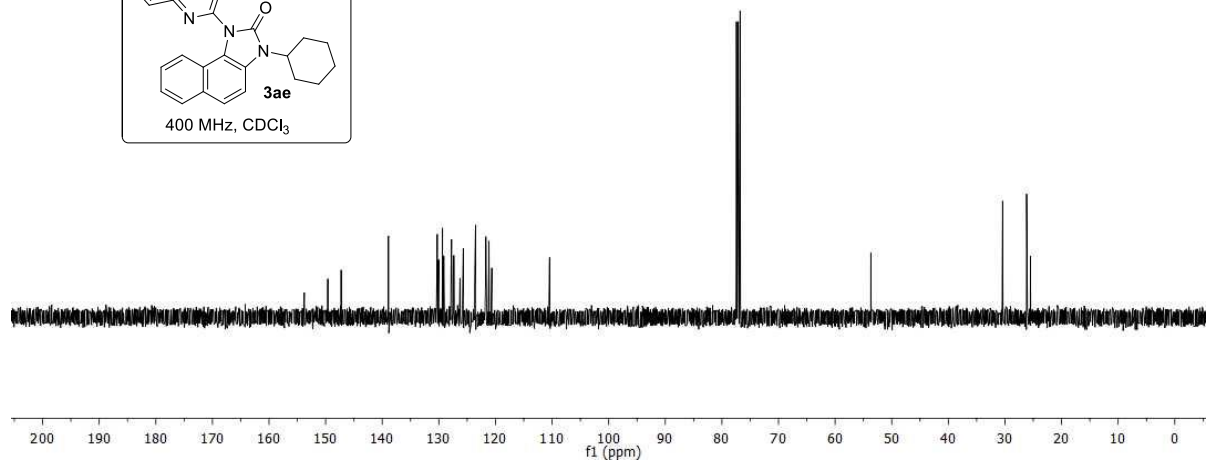

HM-426  
single\_pulse

7.359  
7.337  
7.314  
7.291  
7.268  
7.245  
7.221  
7.200  
7.178  
7.156  
7.134  
7.112  
7.090

4.044  
4.026  
4.008

1.863  
1.845  
1.826  
1.807  
1.788  
1.562  
1.485  
1.465  
1.447  
1.408  
0.990  
0.971  
0.953

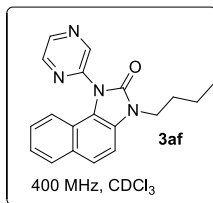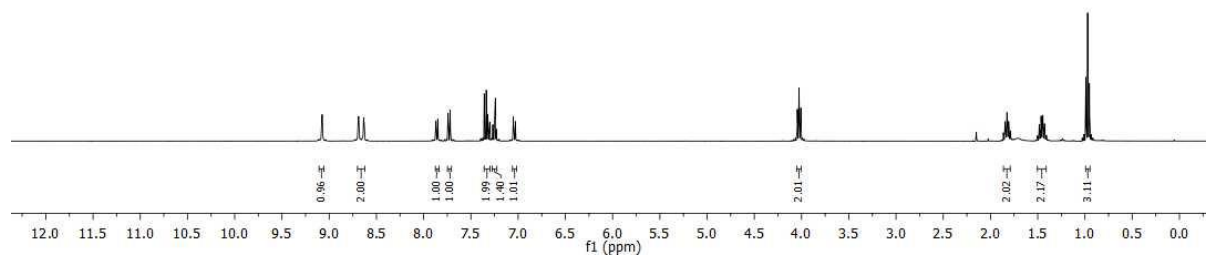

HM-426  
single pulse decoupled gated NOE

153.864  
146.803  
144.415  
143.895  
143.419  
130.405  
129.549  
127.843  
127.578  
124.578  
123.787  
121.862  
121.010  
120.459  
109.228

11.493  
30.726  
20.204  
13.820

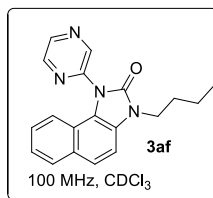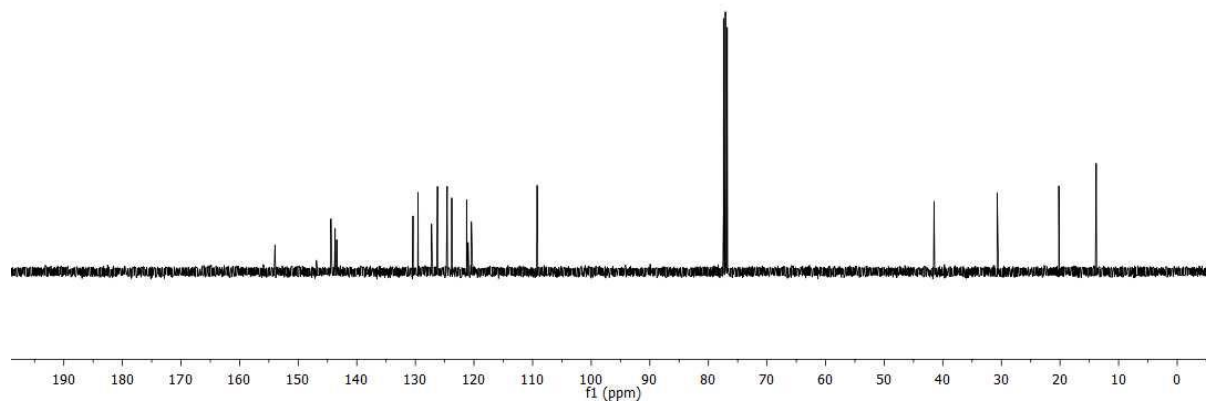

HM-444  
single\_pulse

8.003  
8.999  
8.990  
8.884  
8.881  
8.831  
8.638  
8.635  
7.835  
7.814  
7.772  
7.770  
7.641  
7.618  
7.321  
7.319  
7.304  
7.301  
7.298  
7.298  
7.291  
7.206  
7.203  
7.189  
7.185  
7.181  
7.164  
7.164  
6.858  
6.837

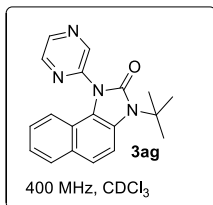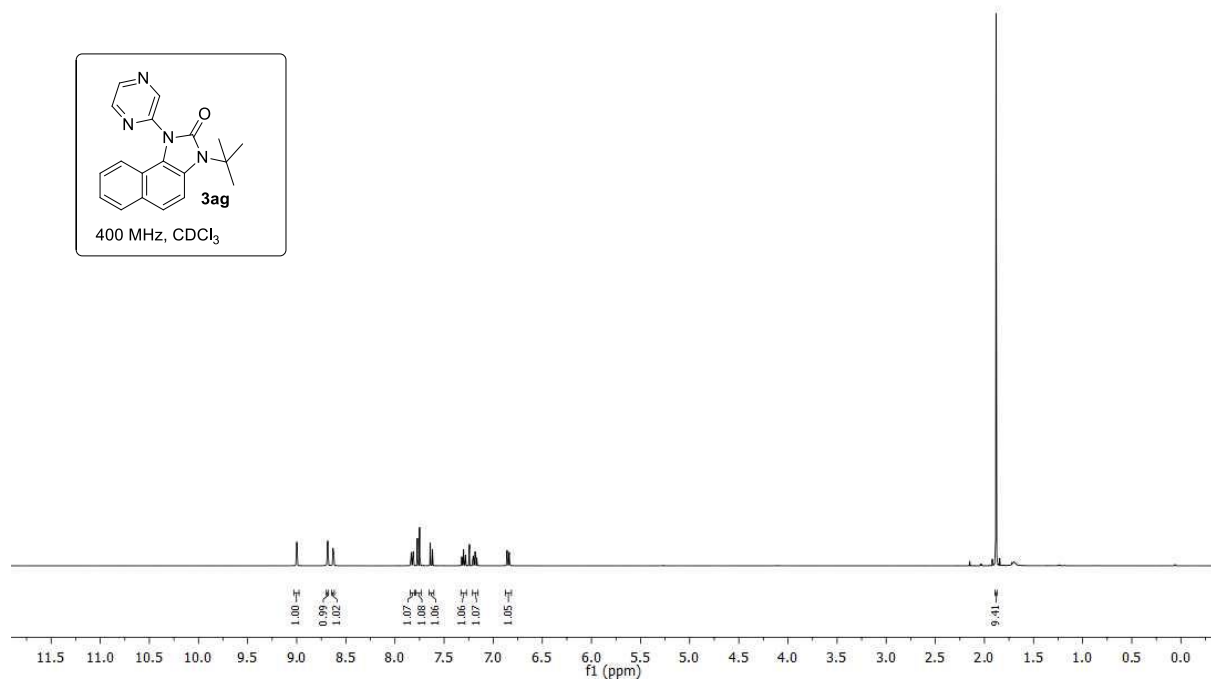

HM-444  
single pulse decoupled gated NOE

153.849  
147.04  
146.062  
143.849  
143.627  
129.675  
128.826  
127.936  
125.966  
123.982  
123.206  
121.930  
121.251  
119.914  
113.158  
-59.062  
-29.822

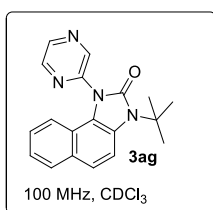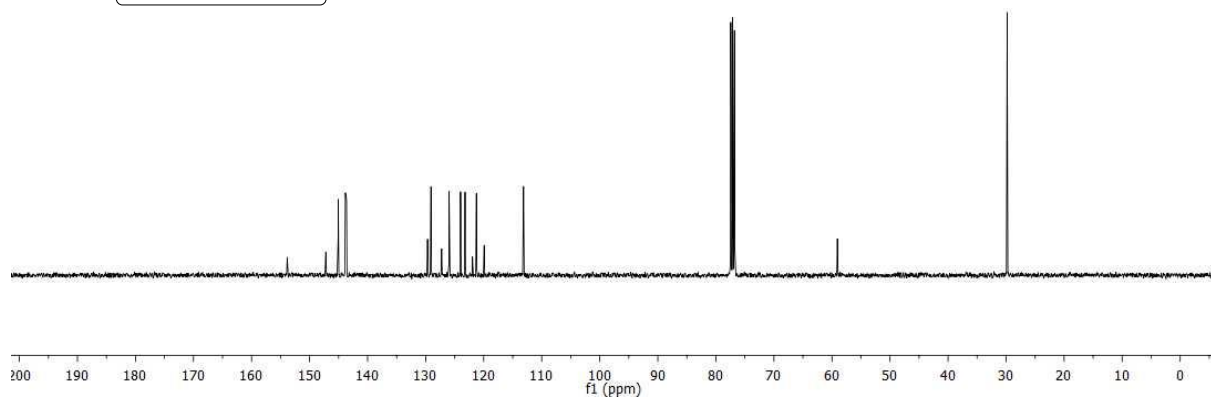

HM-601B  
single\_pulse

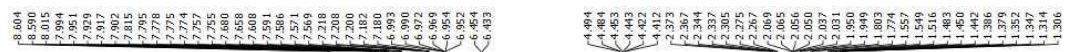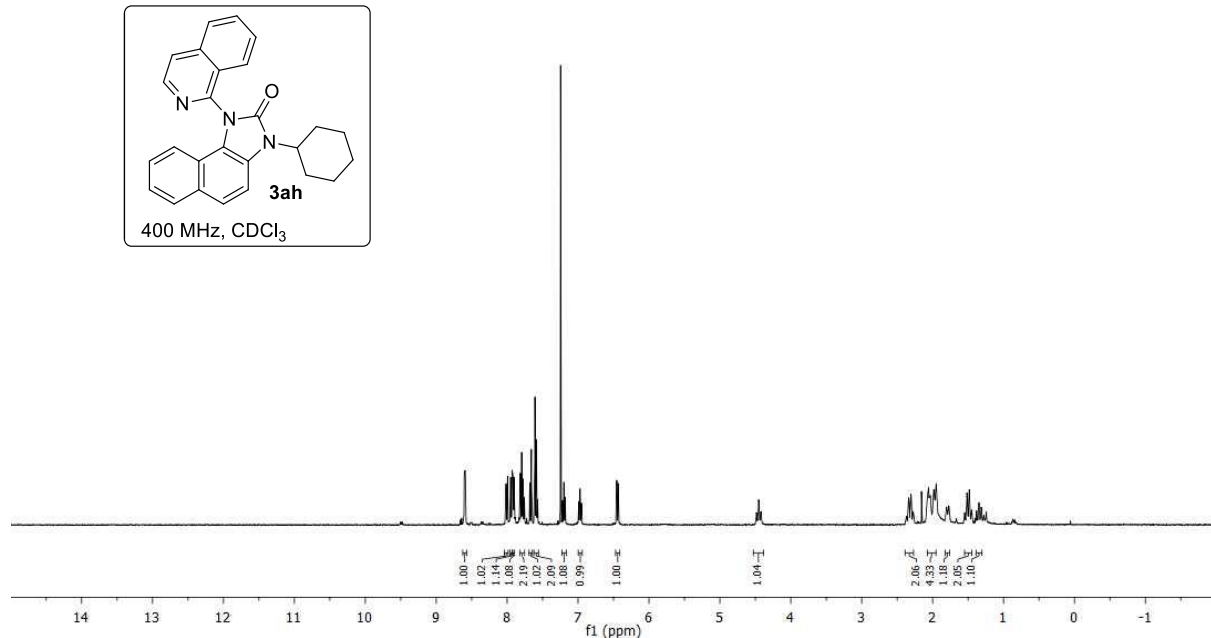

HM-601B  
single pulse decoupled gated NOE

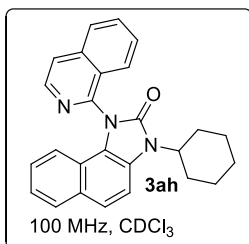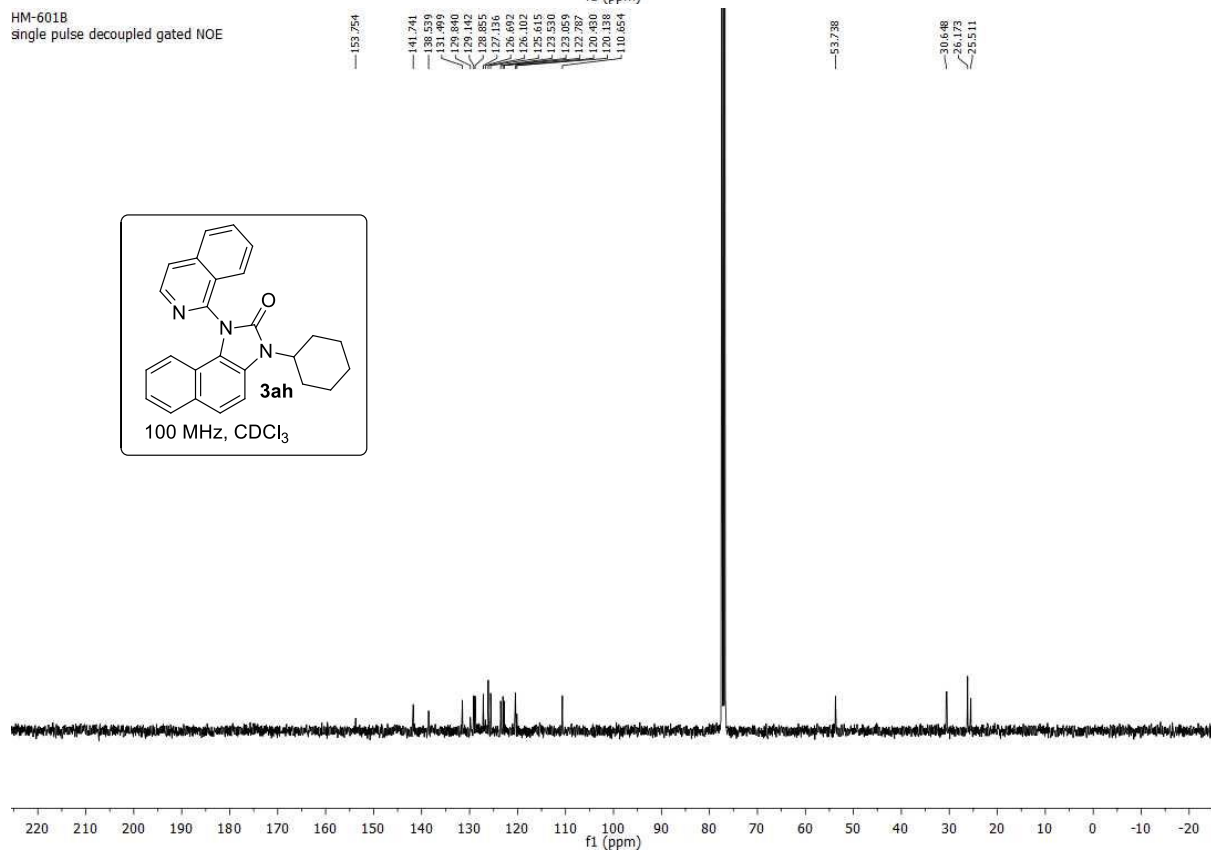



HM-601A  
single\_pulse

9.954  
9.866  
9.861  
9.661  
9.659  
9.641  
9.640  
9.638  
8.624  
8.610  
7.921  
7.917  
7.862  
7.850  
7.799  
7.779  
7.775  
7.762  
7.758  
7.755  
7.725  
7.710  
7.707  
7.693  
7.690

3.522  
3.513  
3.488  
3.484  
3.474  
3.465  
2.113  
2.104  
2.088  
1.795  
1.785  
1.753  
1.743  
1.637  
1.628  
1.605  
1.597  
1.486  
1.468  
1.359  
1.336  
1.318  
1.288  
1.256  
1.225  
1.196

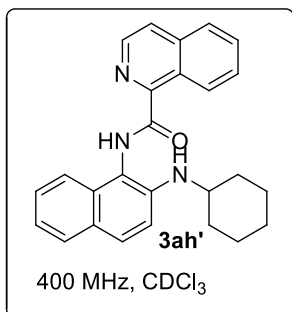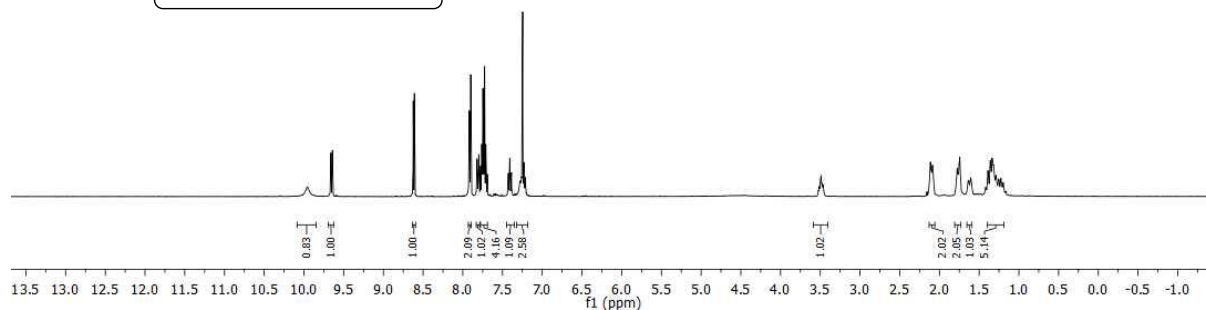

HM-601A  
single pulse decoupled gated NOE

165.217  
160.533  
154.814  
147.882  
140.514  
133.560  
130.778  
129.955  
129.955  
128.307  
128.014  
127.436  
127.055  
126.900  
124.969  
124.666  
120.630  
110.908

33.624  
25.864  
25.021

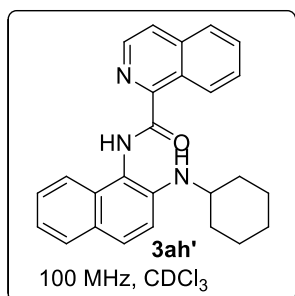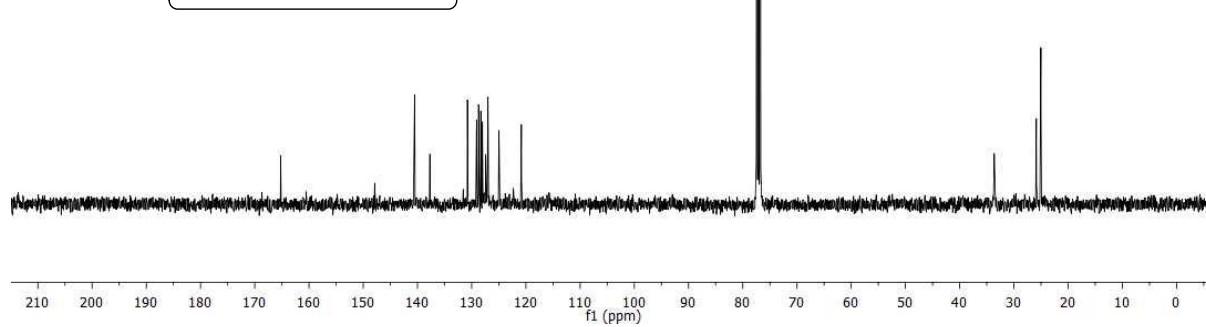

HM-421  
single pulse decoupled gated NOE

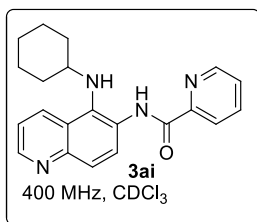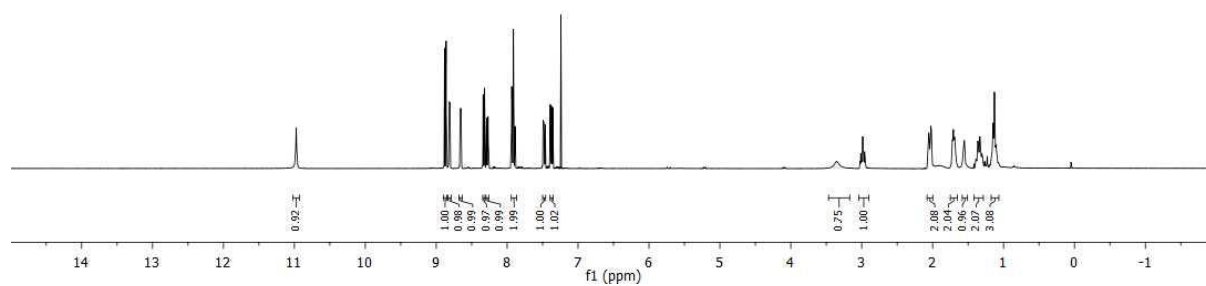

HM-421 1  
single pulse decoupled gated NOE

162.253  
150.760  
148.881  
148.243  
146.159  
137.684  
131.892  
131.033  
130.578  
126.470  
125.936  
125.473  
123.837  
123.473  
120.822  
58.584  
34.800  
25.865  
25.387

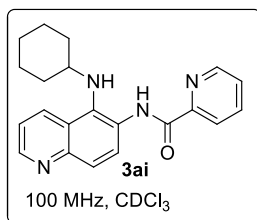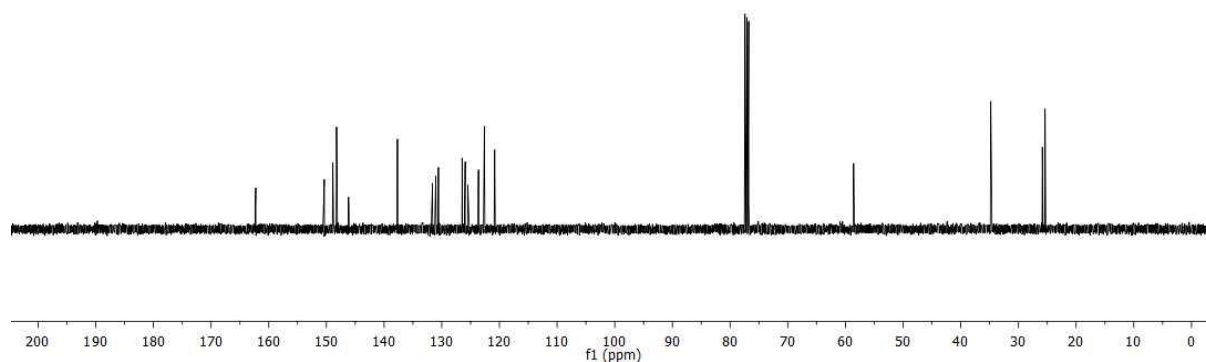

HM-430A  
single\_pulse

8.753  
8.695  
8.693  
8.691  
8.681  
8.679  
8.519  
8.499  
8.494  
7.974  
7.871  
7.855  
7.851  
7.836  
7.826  
7.790  
7.727  
7.661  
7.658  
7.644  
7.641  
7.553  
7.521  
7.555  
7.533  
7.515  
7.488  
7.486  
7.481  
7.478  
7.379  
7.317  
7.310  
7.288  
7.259

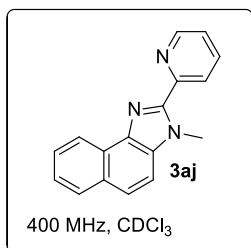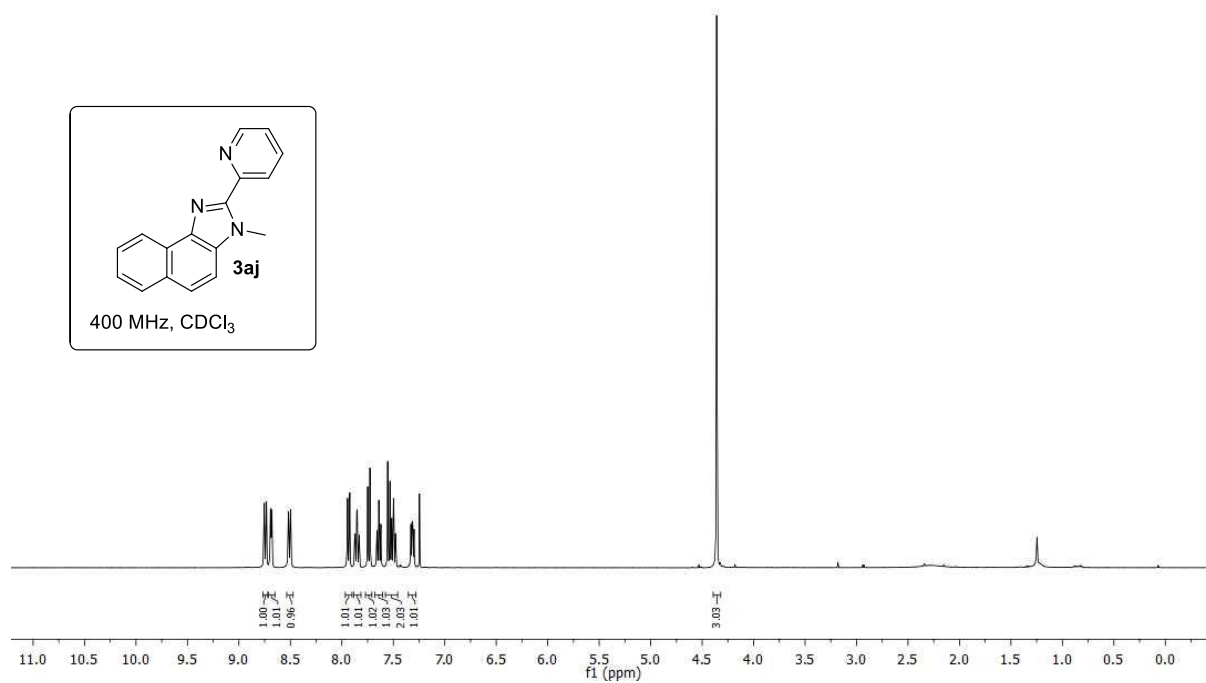

HM-430A  
single pulse decoupled gated NOE

150.862  
148.051  
148.343  
138.155  
136.926  
133.631  
130.611  
128.556  
127.156  
126.951  
126.828  
124.728  
124.671  
123.395  
122.059  
110.492

33.117

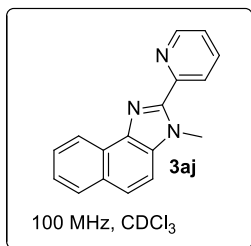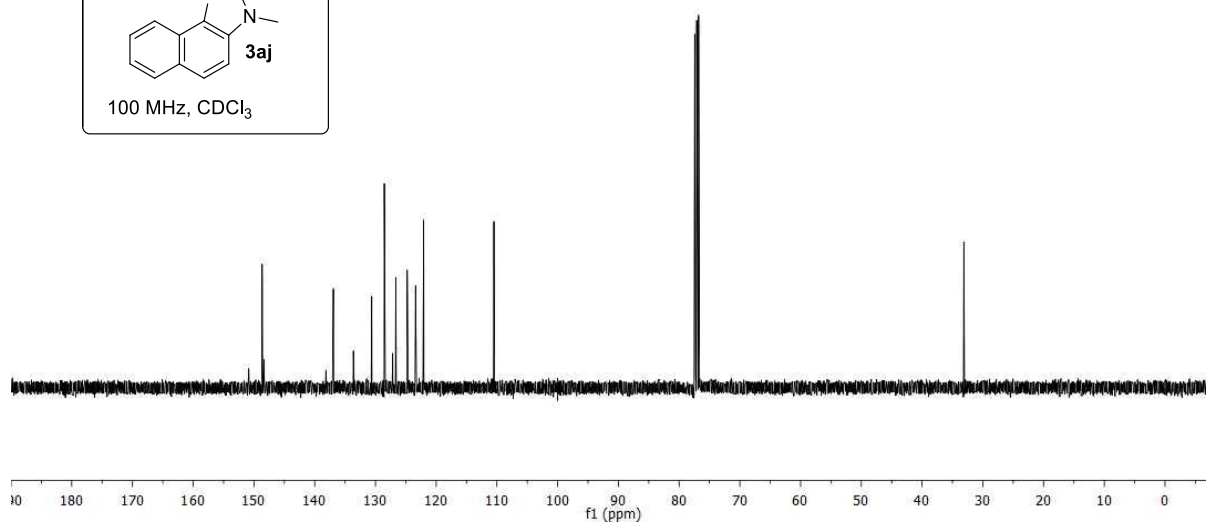

HM-1098 1  
single\_pulse

7.867  
7.863  
7.855  
7.851  
7.559  
7.554  
7.550  
7.535  
7.531  
7.515  
7.327  
7.307  
7.249  
7.246  
7.236  
7.226  
7.206  
7.187  
7.167  
7.055  
7.052  
7.033  
7.012  
7.001  
6.985  
6.978  
6.960  
6.945  
6.933  
6.907  
6.895  
4.375  
4.367  
4.357  
4.344  
4.335  
4.326  
4.313  
4.304  
4.296

2.318  
2.311  
2.288  
2.279  
2.256  
2.244  
1.961  
1.924  
1.779  
1.747  
1.513  
1.481  
1.442  
1.415  
1.351  
1.344  
1.311  
1.279  
1.245

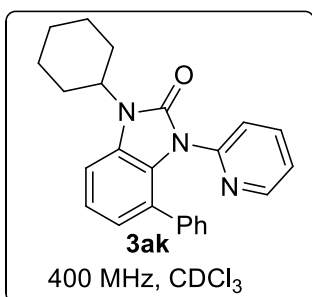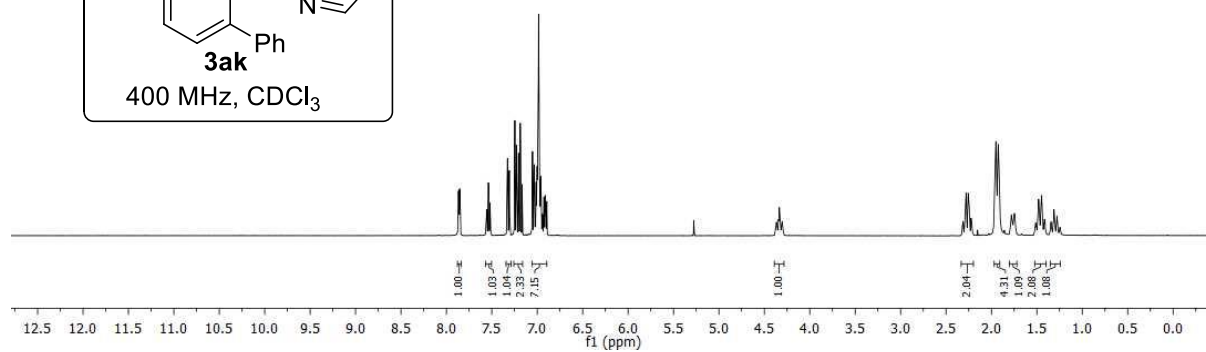

HM-1098 1  
single pulse decoupled gated NOE

153.492  
148.535  
148.055  
138.733  
137.276  
130.206  
128.255  
127.557  
126.855  
126.056  
125.708  
123.796  
122.161  
122.008  
121.866  
108.329  
53.595  
29.980  
26.148  
25.500

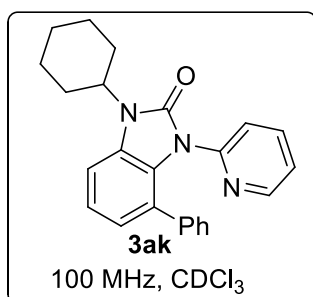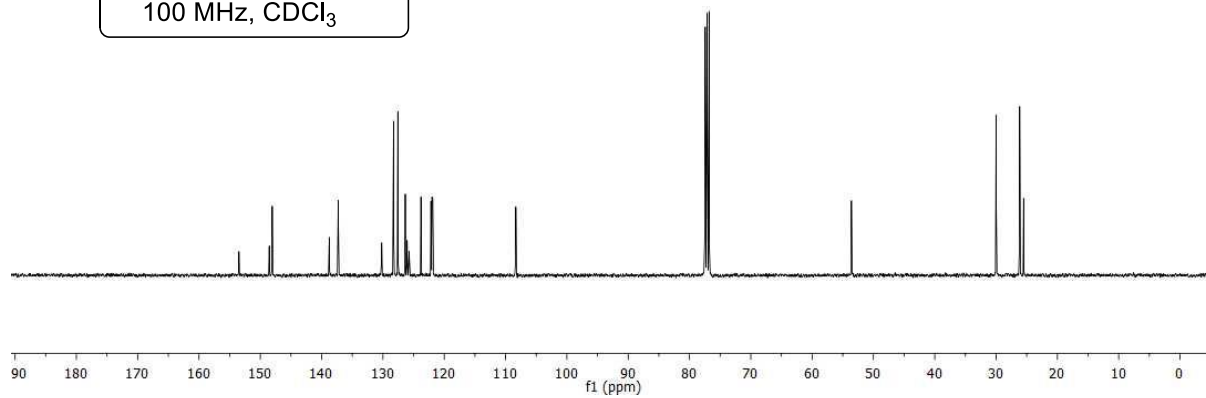

HM-1172  
single\_pulse

7.932  
7.923  
7.507  
7.504  
7.485  
7.483  
7.465  
7.465  
7.285  
7.216  
7.158  
7.138  
7.118  
7.080  
7.066  
7.046  
7.011  
7.008  
6.995  
6.967  
6.952  
6.919  
6.897  
6.901  
6.889

1.857

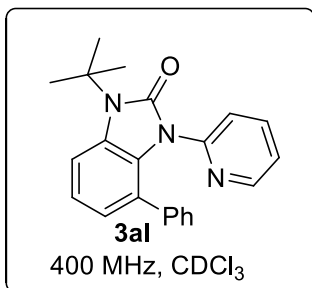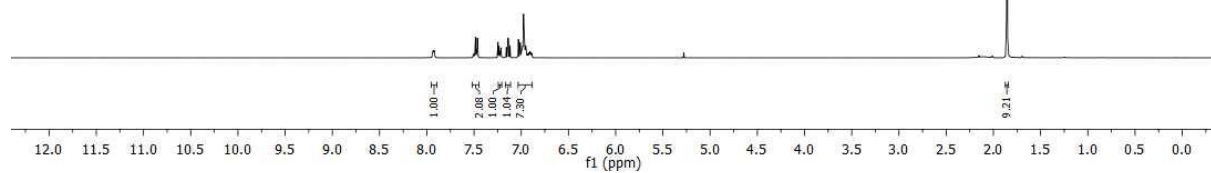

HM-1172  
single pulse decoupled gated NOE

153.842  
148.815  
148.132  
139.765  
139.757  
139.861  
139.889  
128.392  
127.550  
126.319  
126.238  
125.913  
125.772  
122.762  
121.960  
121.546  
111.200  
58.729  
29.599

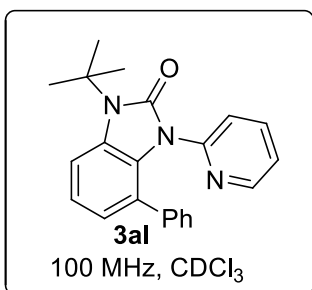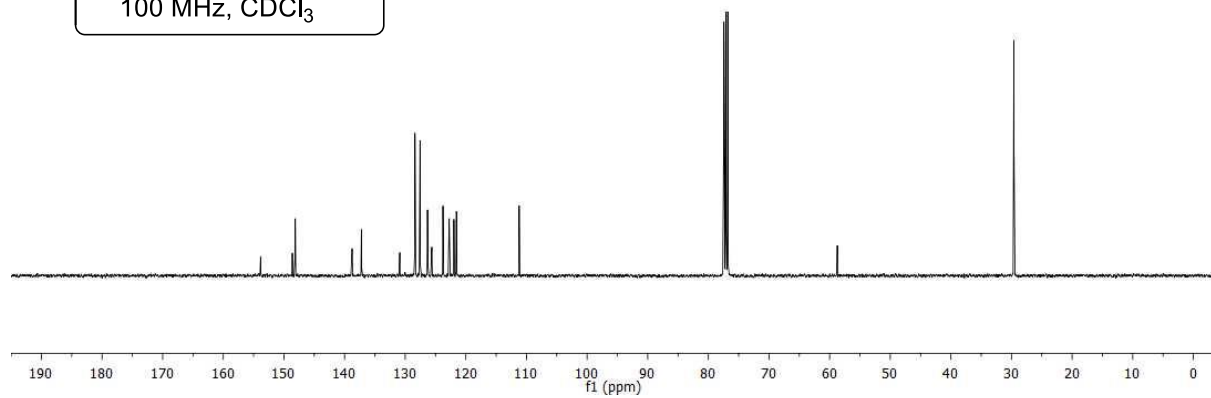



HM-1168  
single\_pulse

8.503  
8.491  
8.487  
7.882  
7.877  
7.863  
7.858  
7.853  
7.839  
7.834  
7.594  
7.314  
7.312  
7.302  
7.296  
7.290  
7.284  
7.283  
7.282  
7.182  
7.178  
7.162  
7.152  
7.130  
7.100  
7.081  
7.065  
7.062  
7.046  
7.030  
6.923  
4.214  
4.183  
4.173  
4.152  
4.148  
3.978  
3.955  
2.246  
2.224  
2.215  
2.192  
2.183  
1.897  
1.850  
1.732  
1.700  
1.466  
1.447  
1.392  
1.349  
1.300  
1.293  
1.261  
1.229  
1.221

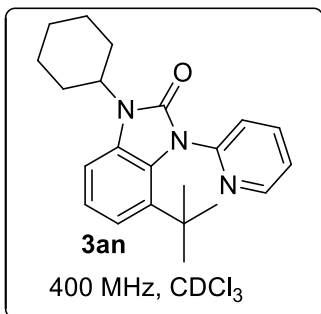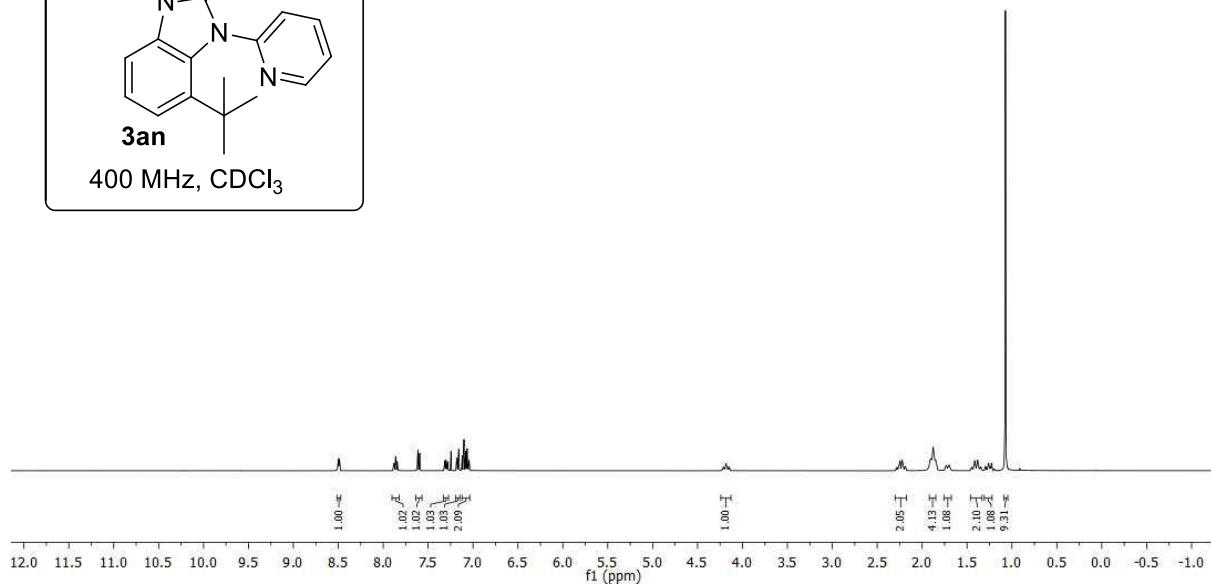

HM-1168  
single pulse decoupled gated NOE

155.578  
153.765  
148.718  
130.000  
136.533  
132.210  
129.292  
129.533  
129.237  
129.567  
121.712  
107.132  
53.804  
34.936  
29.670  
26.178  
25.460

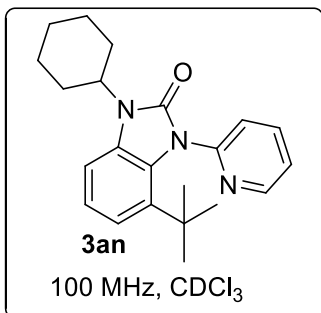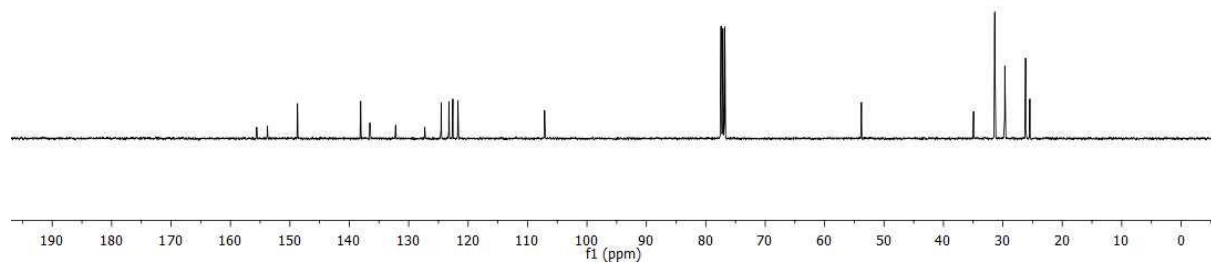





HM-1130  
single\_pulse

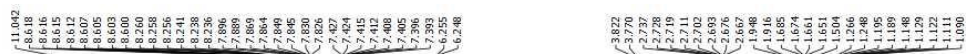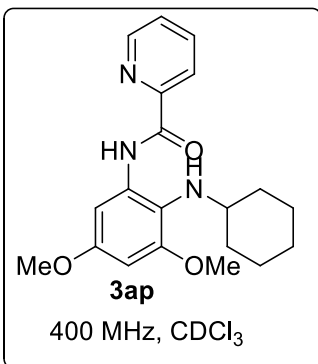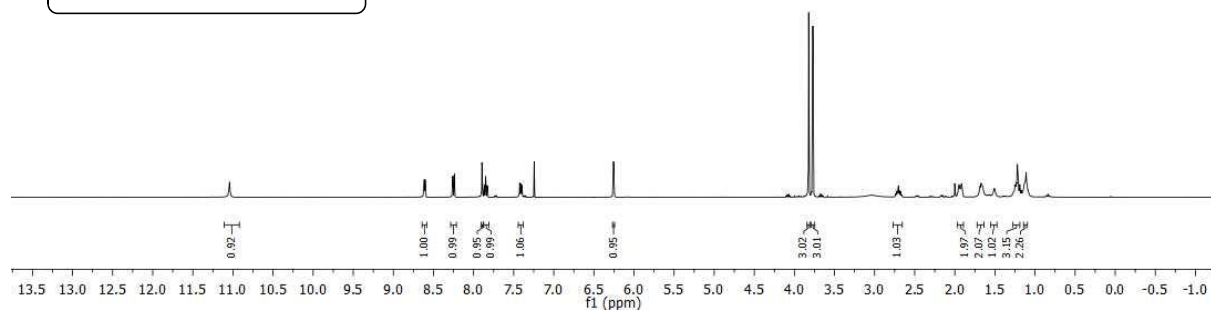

HM-1130  
single pulse decoupled gated NOE

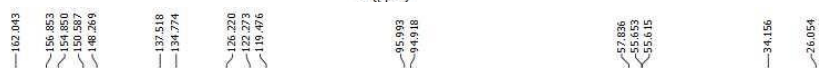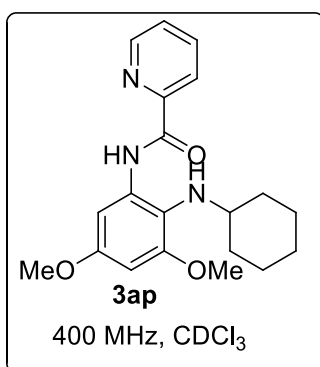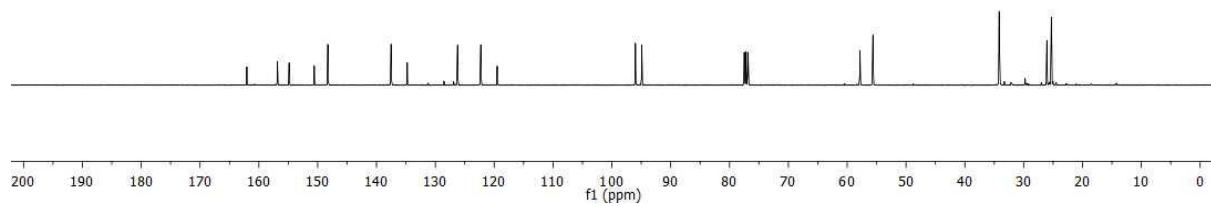

HM-1138  
single\_pulse

10.867  
8.626  
8.623  
8.622  
8.620  
8.614  
8.610  
8.610  
8.608  
8.302  
8.299  
8.297  
8.283  
8.280  
8.277  
8.231  
7.900  
7.886  
7.881  
7.877  
7.862  
7.852  
7.853  
7.850  
7.744  
7.741  
7.438  
7.434  
7.431  
7.416  
7.415  
6.752  
2.829  
2.820  
2.811  
2.805  
2.793  
2.785  
2.775  
2.766  
2.308  
2.280  
2.278  
2.028  
1.707  
1.695  
1.684  
1.676  
1.590  
1.541  
1.129  
1.109  
1.079

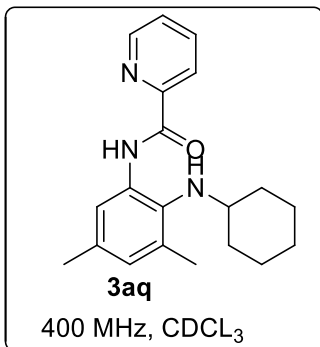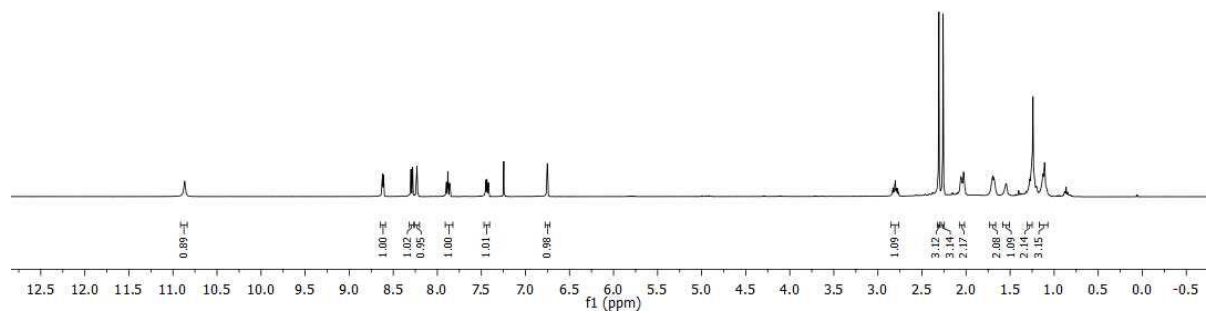

HM-1138  
single\_pulse decoupled gated NO

166.851  
150.789  
148.138  
137.524  
135.164  
133.165  
131.536  
126.569  
126.124  
122.378  
118.575  
58.007  
34.711  
25.950  
21.764  
21.294  
18.330

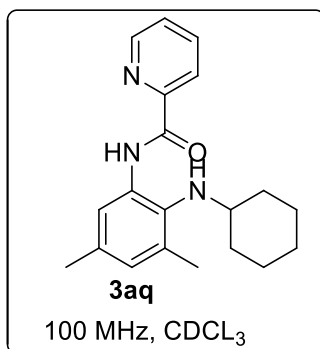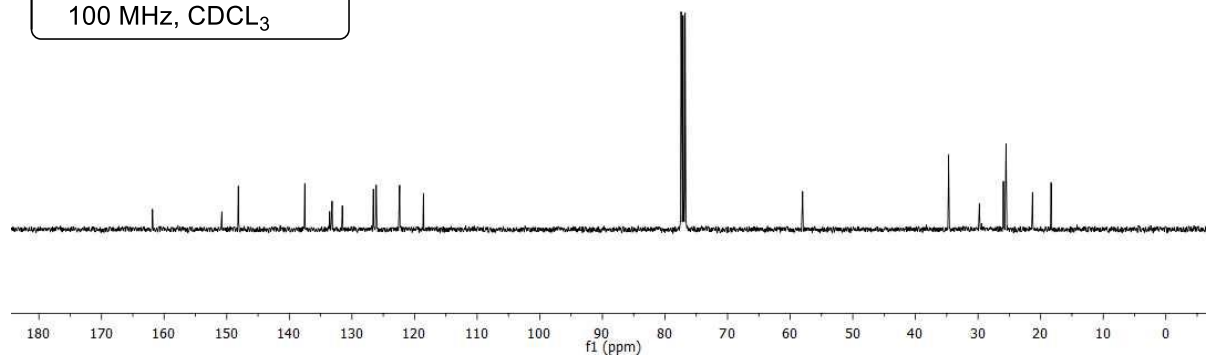

HM-1361  
single\_pulse

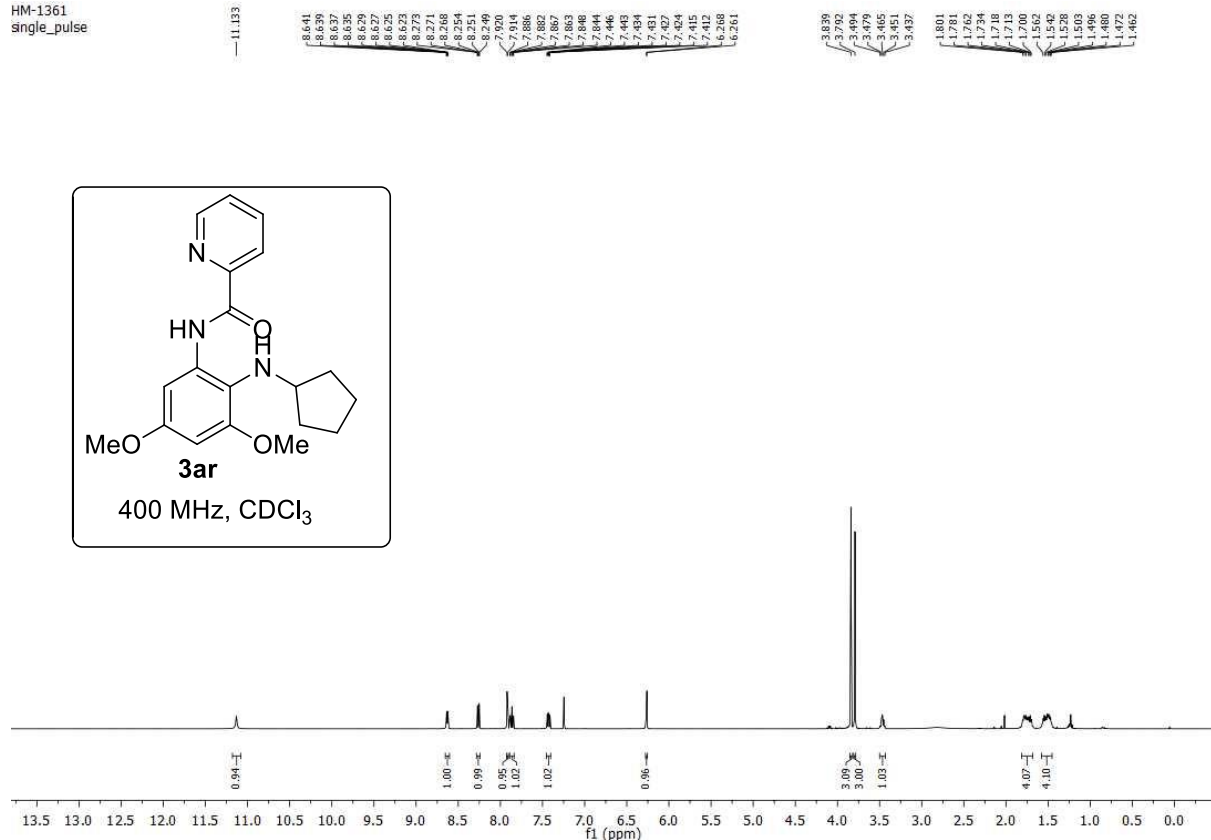

HM-1361  
single pulse decoupled gated NO

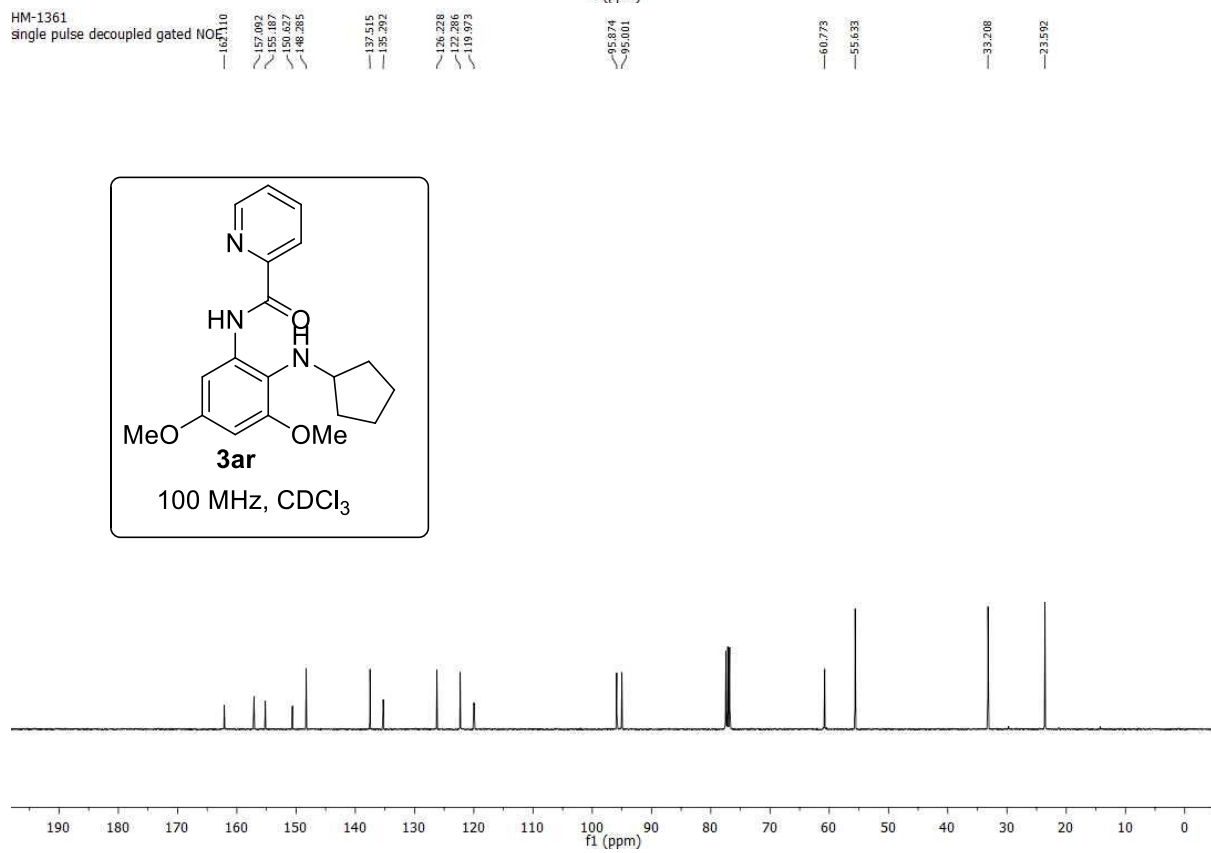

HM-1353  
single\_pulse

11.026  
8.645  
8.643  
8.641  
8.639  
8.633  
8.631  
8.627  
8.625  
8.279  
8.276  
8.274  
8.259  
8.254  
8.254  
7.900  
7.896  
7.880  
7.876  
7.867  
7.857  
7.853  
7.460  
7.459  
7.451  
7.448  
7.444  
7.441  
7.432  
7.429  
7.428  
6.281  
6.275  
3.840  
3.811  
2.865  
2.847  
2.830  
1.646  
1.628  
1.610  
1.591  
1.573  
1.566  
1.471  
1.452  
1.433  
1.415  
1.397  
0.913  
0.876  
0.876

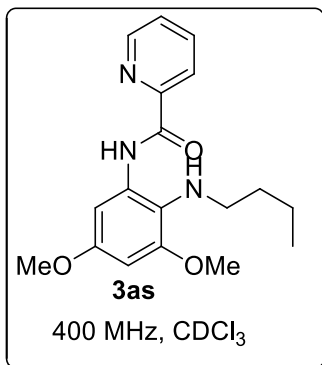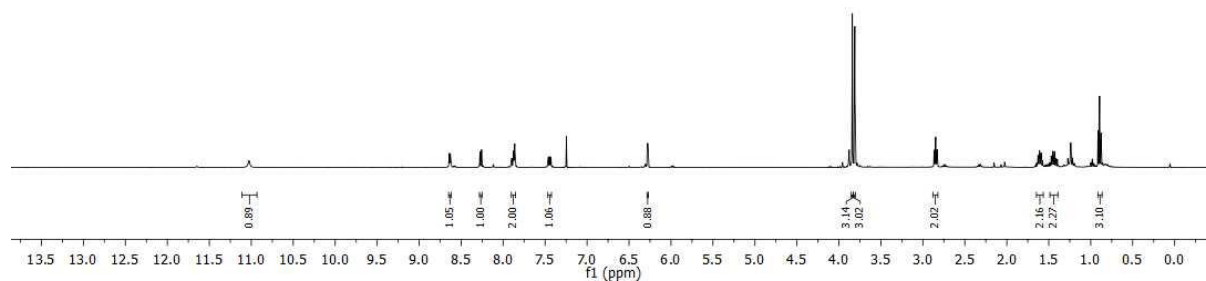

HM-1353  
single\_pulse decoupled gated NOE

162.324  
157.103  
154.618  
150.533  
148.309  
137.524  
134.970  
126.276  
122.309  
96.237  
95.159  
55.772  
55.674  
49.810  
32.781  
20.340  
14.114

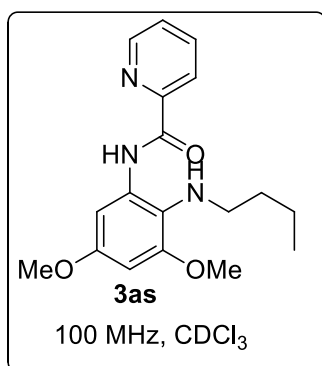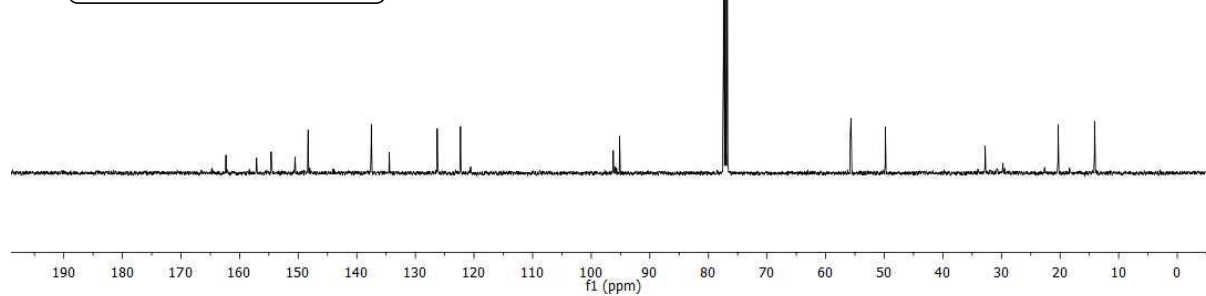

HM-1356  
single\_pulse

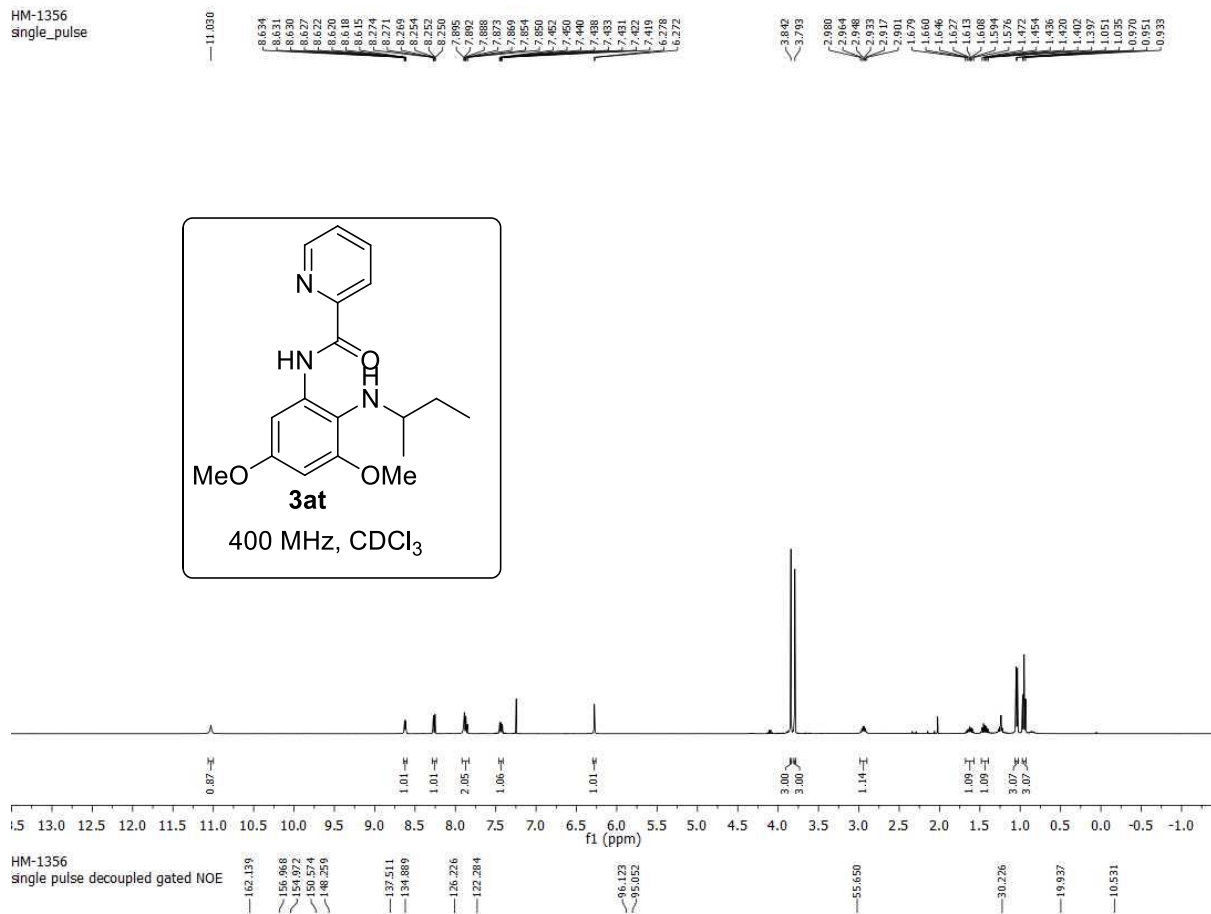

HM-1356  
single pulse decoupled gated NOE

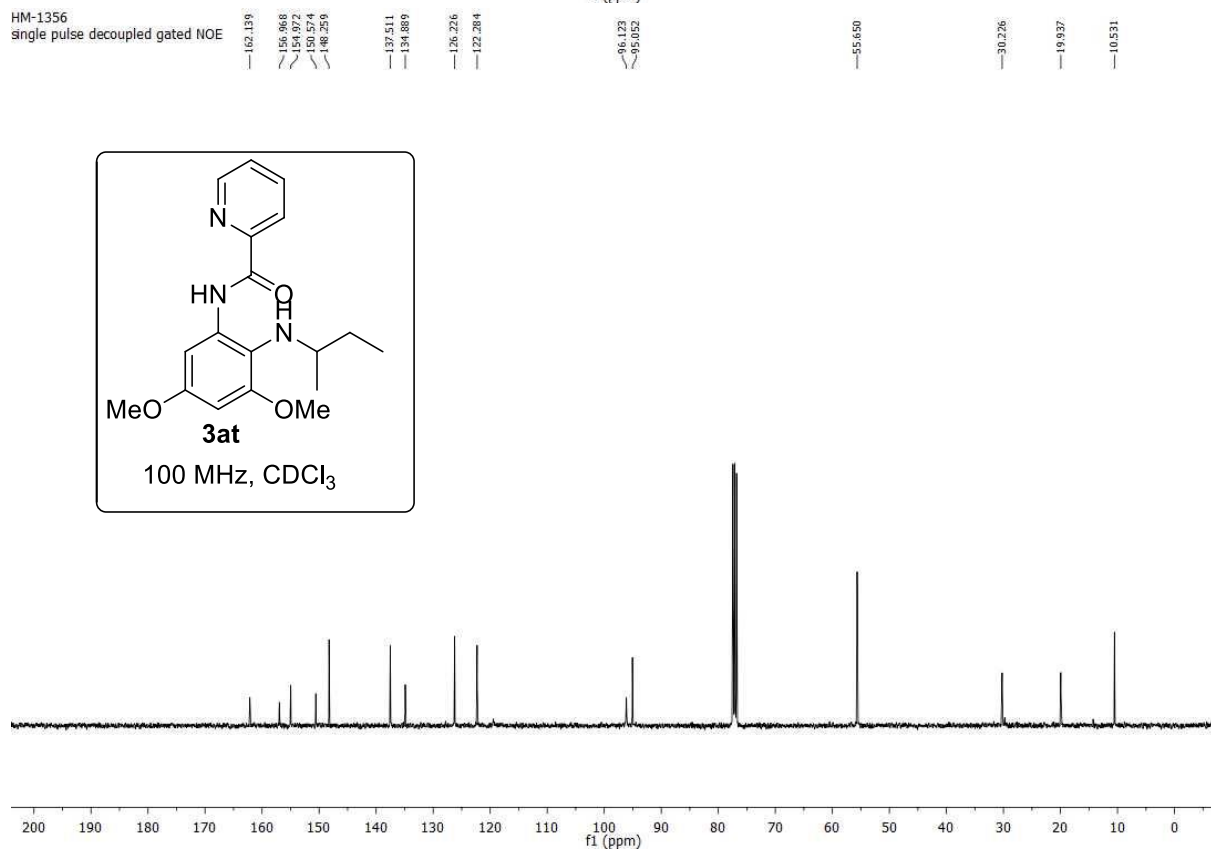

HM-766  
single\_pulse

8.784  
8.779  
8.719  
8.717  
8.715  
8.713  
8.707  
8.705  
8.701  
8.701  
8.370  
8.350  
7.925  
7.905  
7.894  
7.890  
7.886  
7.886  
7.664  
7.640  
7.630  
7.602  
7.599  
7.511  
7.507  
7.493  
7.489  
7.487  
7.473  
7.470  
7.360  
7.357  
7.348  
7.345  
7.345  
7.338  
7.338  
7.326  
7.326  
5.589  
5.589  
5.588  
5.577  
5.517  
2.384  
2.384  
2.354  
2.354  
2.323  
2.292  
2.163  
2.153  
2.126  
2.121  
1.989  
1.976  
1.970  
1.965  
1.960  
1.790  
1.521  
1.512  
1.504  
1.480  
1.447  
1.429  
1.397  
1.397

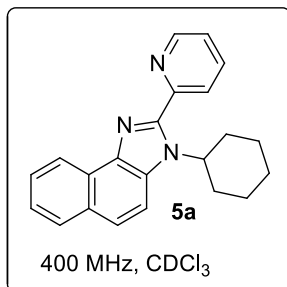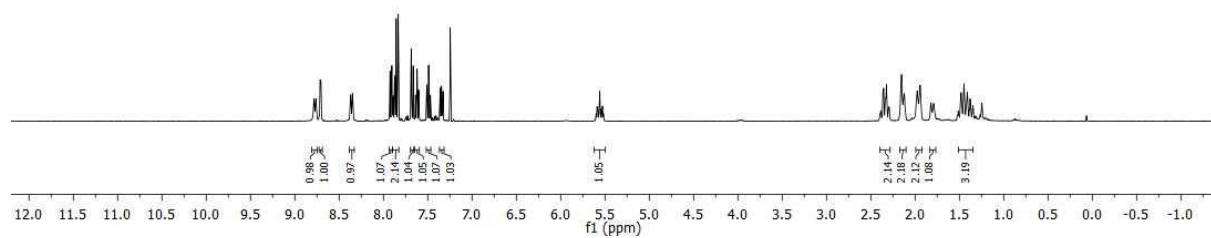

HM-766  
single pulse decoupled gated NOE

148.894  
136.800  
131.279  
130.079  
128.594  
128.239  
126.582  
125.859  
125.852  
124.803  
123.806  
123.791  
123.545  
122.534  
122.188  
113.079

-57.228

-31.854

-26.267

-25.630

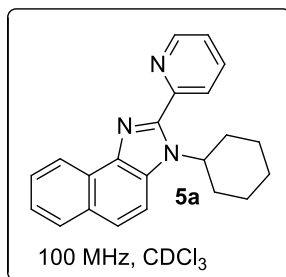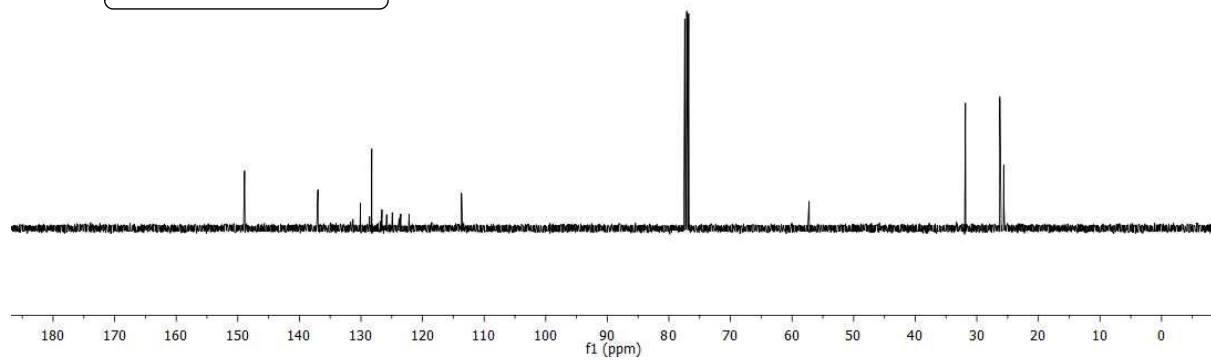

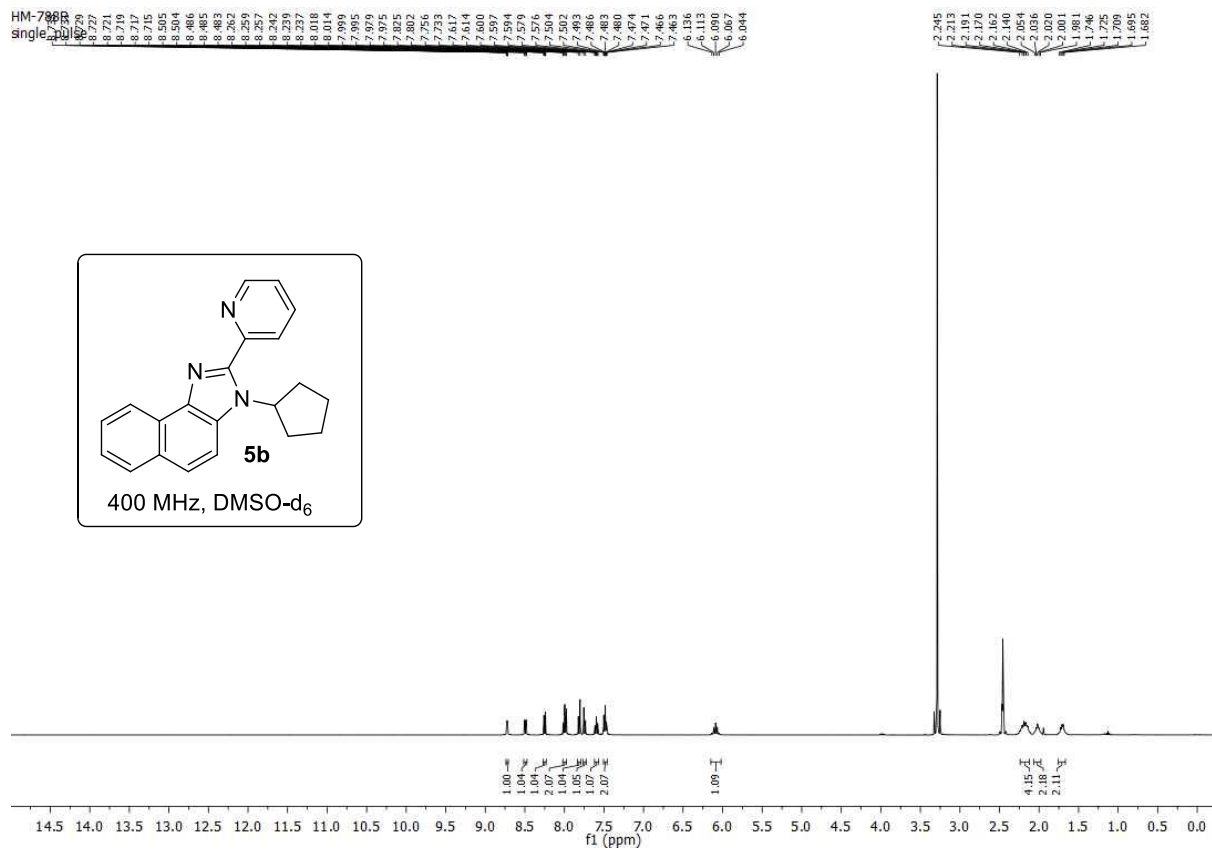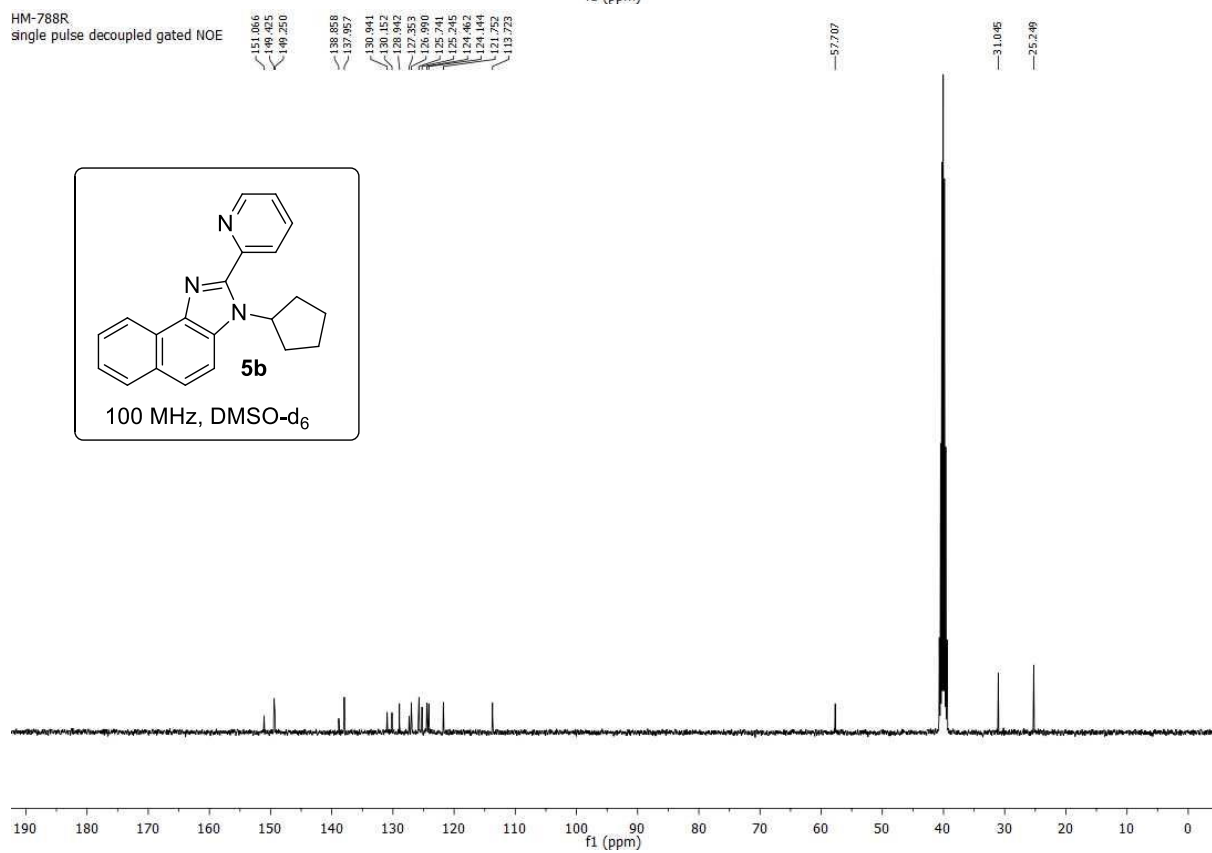

HM-801  
single\_pulse

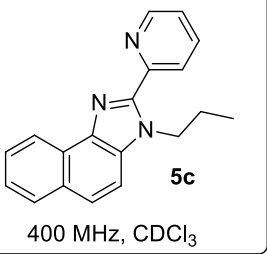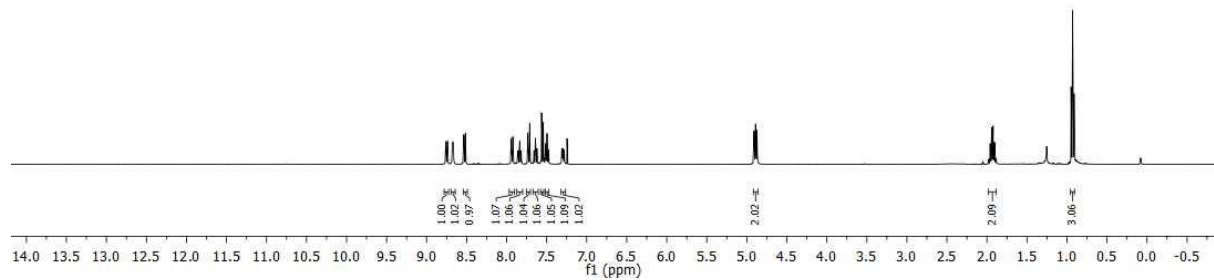

HM-801  
single\_pulse decoupled gated NOE

151.016  
148.700  
149.989  
138.249  
138.834  
139.414  
139.559  
138.507  
127.261  
126.616  
124.741  
124.667  
123.521  
122.518  
122.014  
110.892  
47.213  
24.004  
11.377

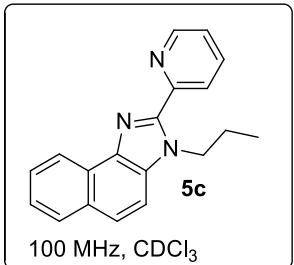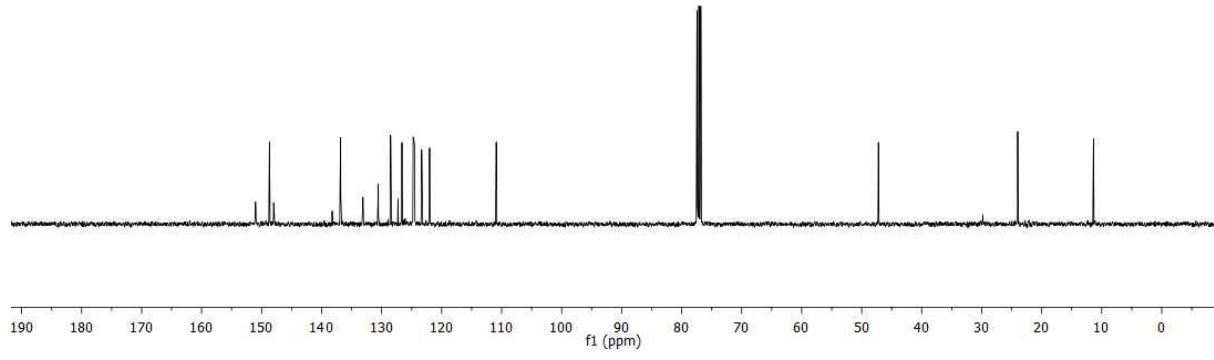



HM-781  
single\_pulse

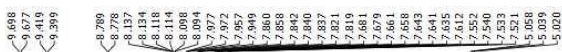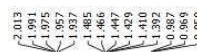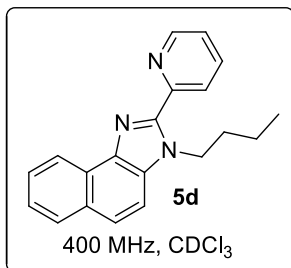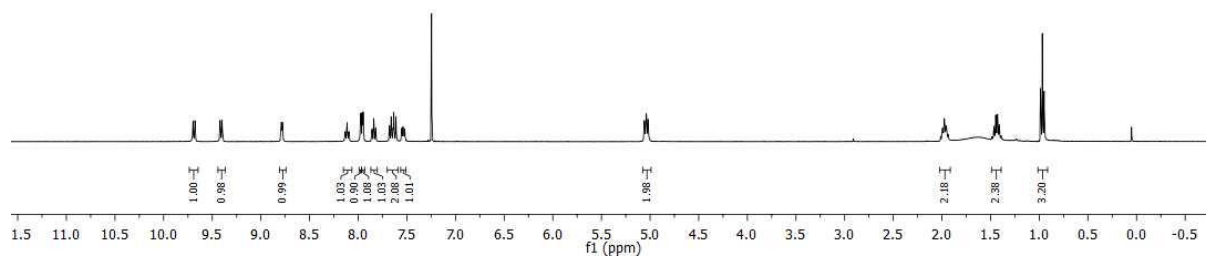

HM-781  
single pulse decoupled gated NOE

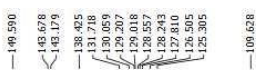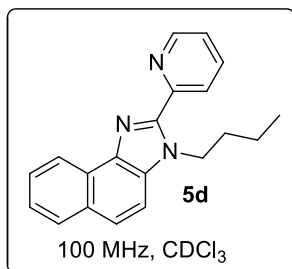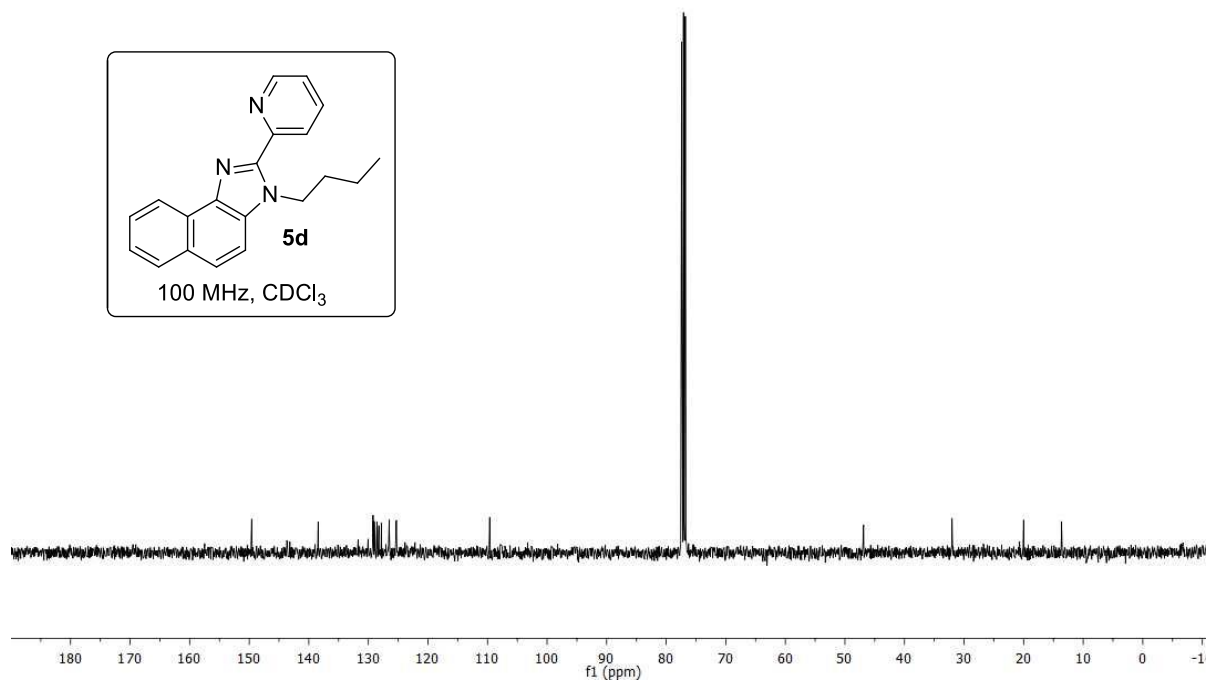

HM-815  
single\_pulse

9.765  
9.756  
9.752  
9.734  
9.729  
9.674  
9.672  
9.668  
9.662  
9.660  
9.658  
9.656  
9.537  
9.535  
9.532  
9.517  
9.514  
9.512  
7.939  
7.930  
7.885  
7.885  
7.885  
7.841  
7.841  
7.826  
7.821  
7.777  
7.765  
7.656  
7.641  
7.641  
7.635  
7.635  
7.621  
7.618  
7.581  
7.581  
7.512  
7.512  
7.497  
7.494  
7.491  
7.491  
7.474  
7.474  
7.316  
7.313  
7.304  
7.297  
7.284  
7.285  
7.285  
7.277  
7.277  
4.887  
4.789  
2.306  
2.289  
2.271  
2.271  
2.254  
2.254  
2.219  
2.202  
2.202  
0.885  
0.885

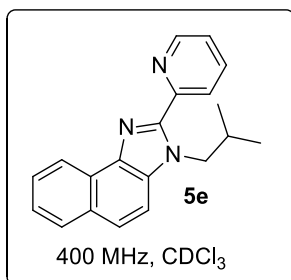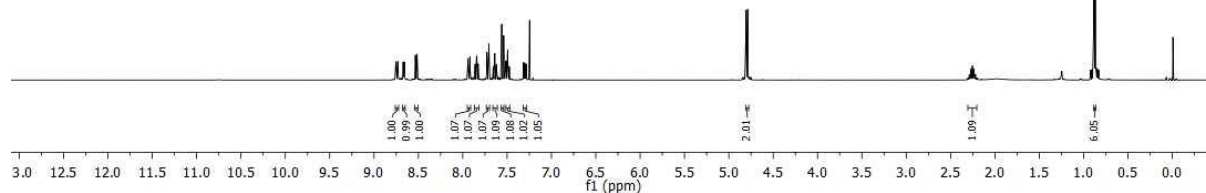

HM-815  
single pulse decoupled gated NOE

151.227  
148.545  
148.197  
138.210  
138.165  
138.507  
139.574  
128.502  
127.286  
126.620  
124.747  
124.420  
123.316  
122.015  
111.391

57.580

30.190

20.212

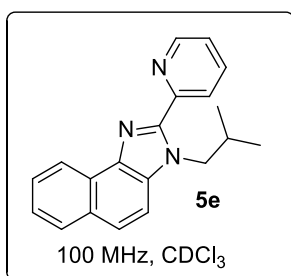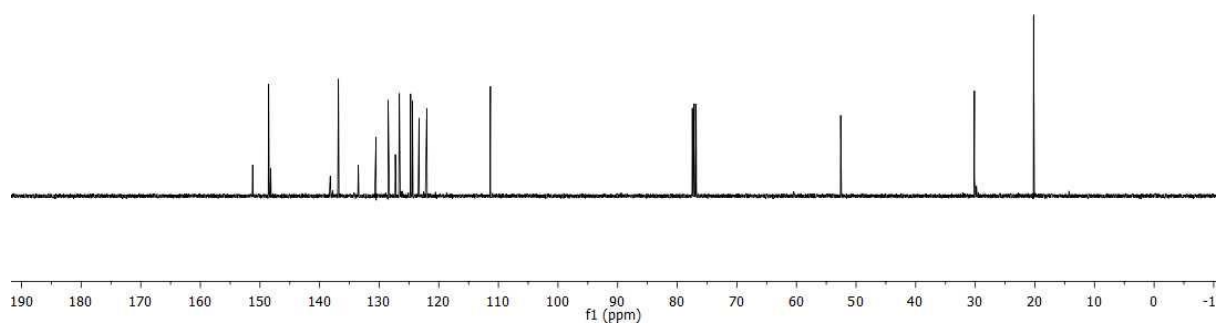

HM-782  
single\_pulse

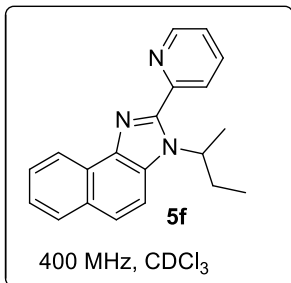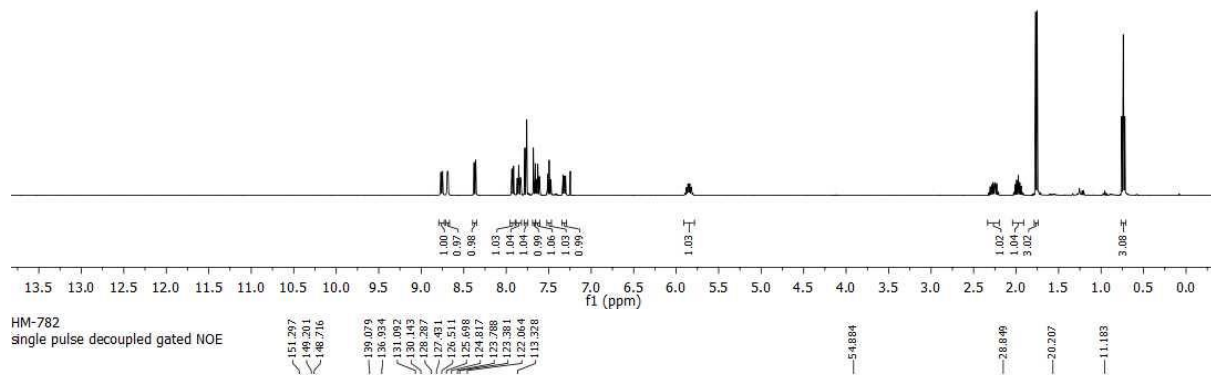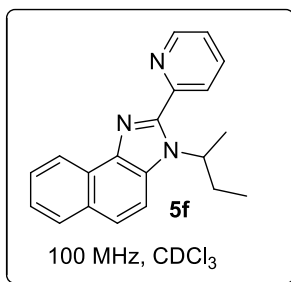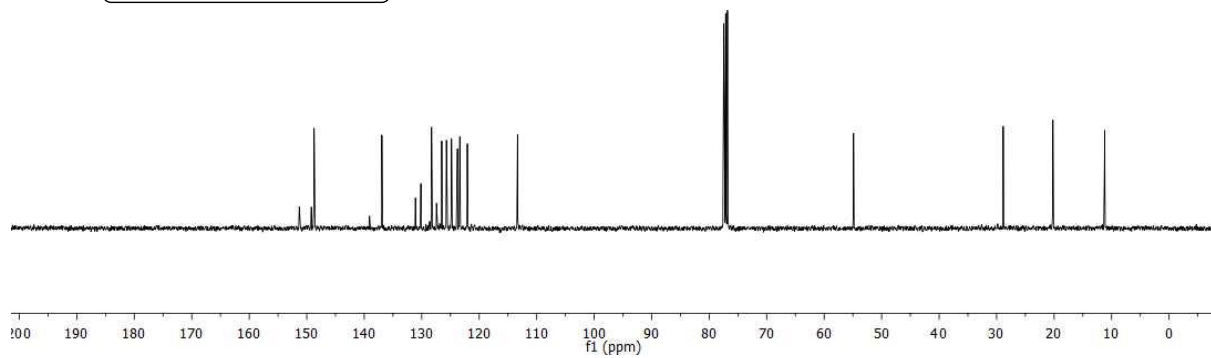

HM-752  
single\_pulse

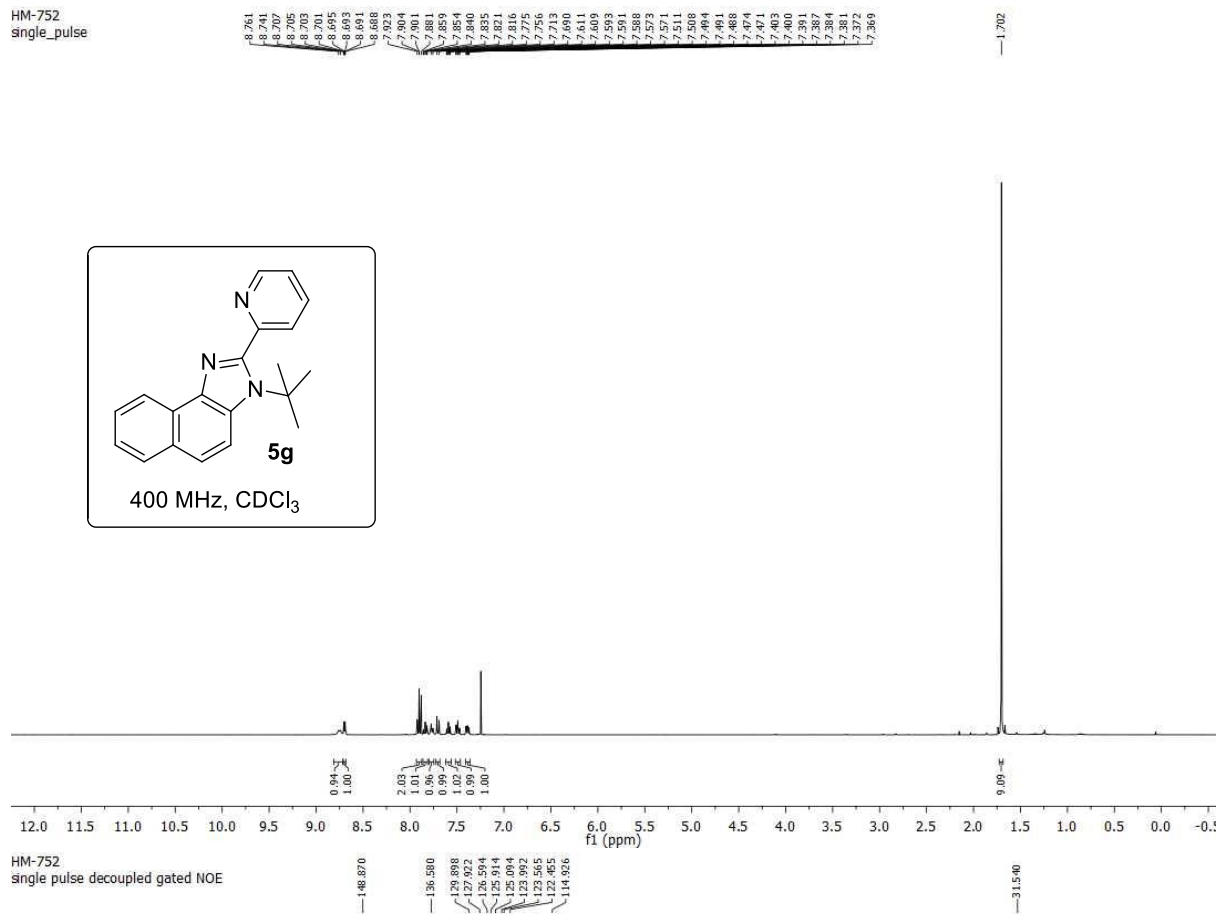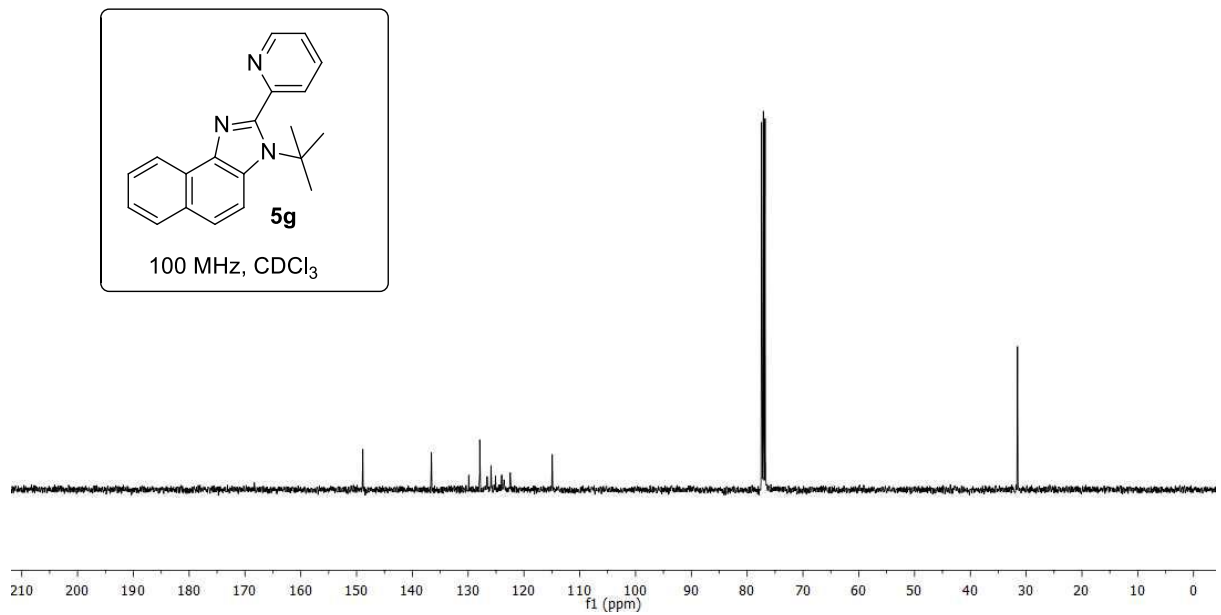

HM-482G  
single\_pulse

8.793  
8.772  
8.620  
8.618  
8.616  
8.614  
8.608  
8.604  
8.602  
8.577  
8.557  
7.917  
7.897  
7.883  
7.843  
7.843  
7.839  
7.824  
7.819  
7.672  
7.669  
7.654  
7.654  
7.631  
7.518  
7.515  
7.501  
7.498  
7.483  
7.483  
7.477  
7.453  
7.431  
7.304  
7.301  
7.282  
7.282  
7.285  
7.282  
7.273  
7.270  
7.224  
7.220  
7.206  
7.200  
7.196  
7.184  
7.152  
7.147  
7.131  
7.127  
6.393

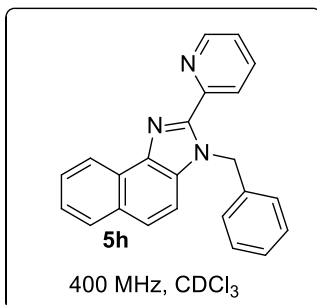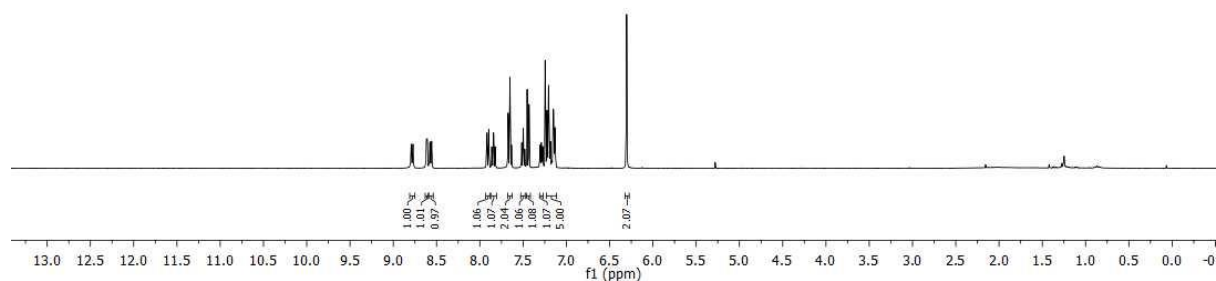

HM-482G  
single\_pulse decoupled gated NOE

150.633  
148.706  
147.960  
137.560  
136.971  
133.202  
130.090  
129.679  
129.531  
127.865  
127.086  
126.771  
124.957  
124.744  
123.586  
122.079  
111.142  
-49.184

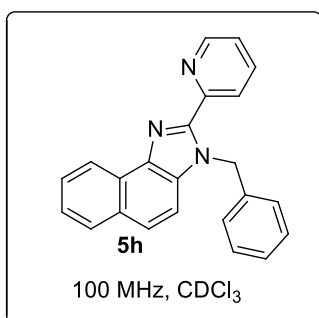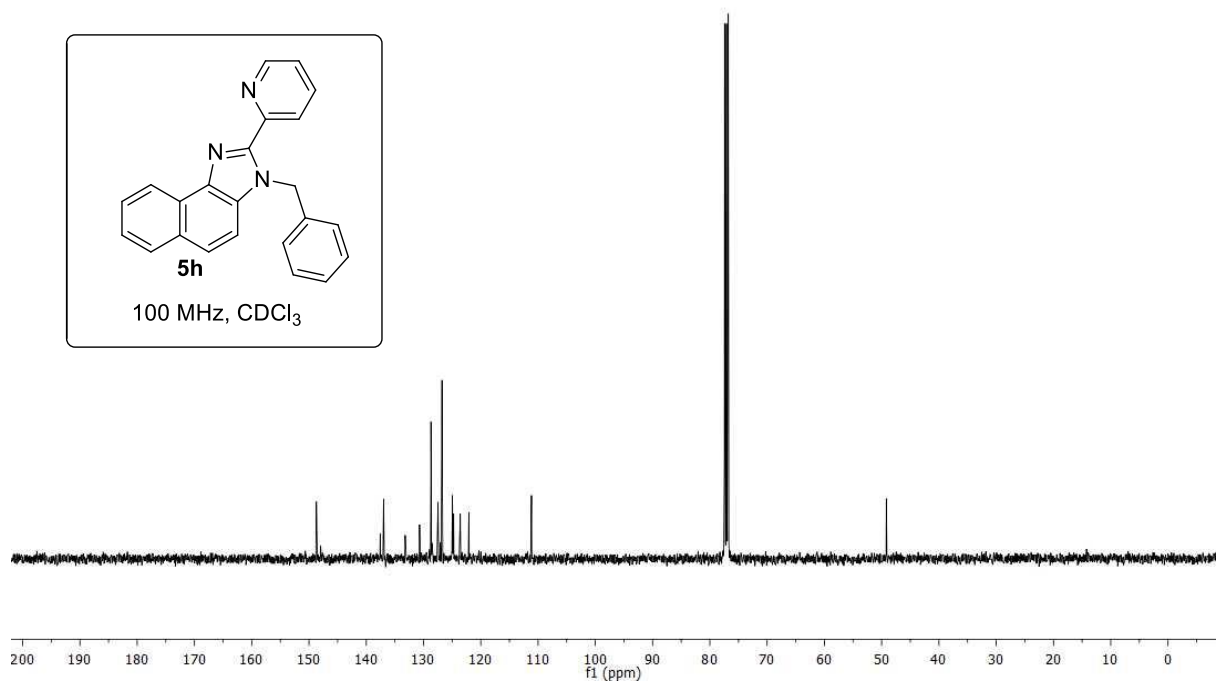

HM-417G  
single\_pulse

8.757  
8.736  
8.711  
8.709  
8.707  
8.705  
8.697  
8.695  
8.693  
8.573  
8.553  
7.939  
7.937  
7.883  
7.878  
7.863  
7.859  
7.844  
7.839  
7.781  
7.771  
7.699  
7.656  
7.653  
7.636  
7.635  
7.619  
7.616  
7.517  
7.514  
7.499  
7.496  
7.494  
7.479  
7.476  
7.348  
7.345  
7.336  
7.333  
7.329  
7.328  
7.317  
7.314  
6.288  
6.217  
6.213  
6.209  
6.197  
6.197  
6.186  
6.189  
6.188

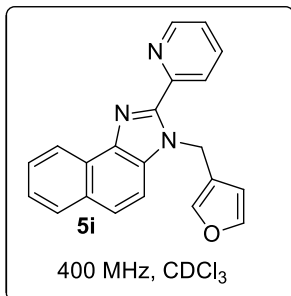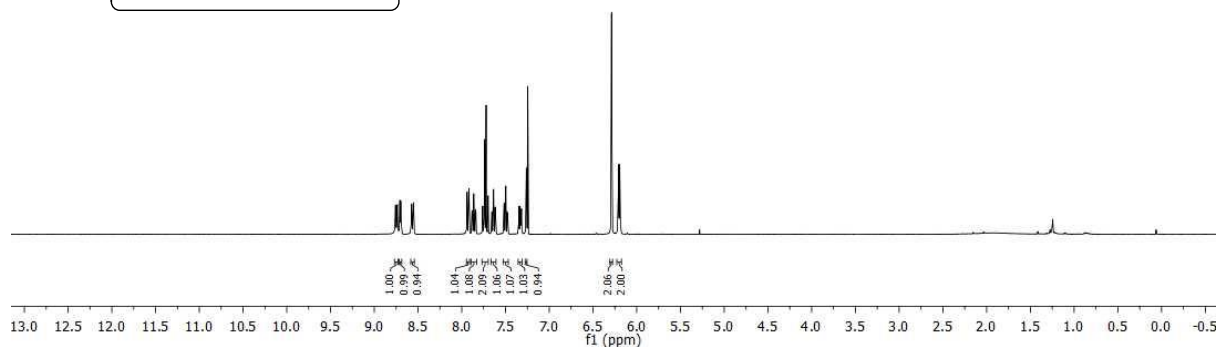

HM-417G  
single pulse decoupled gated NOE

150.838  
148.526  
147.375  
142.337  
139.112  
137.112  
130.710  
128.511  
127.025  
126.717  
124.980  
124.767  
124.562  
123.609  
122.069  
111.107  
110.483  
108.260  
42.344

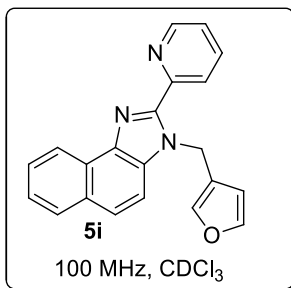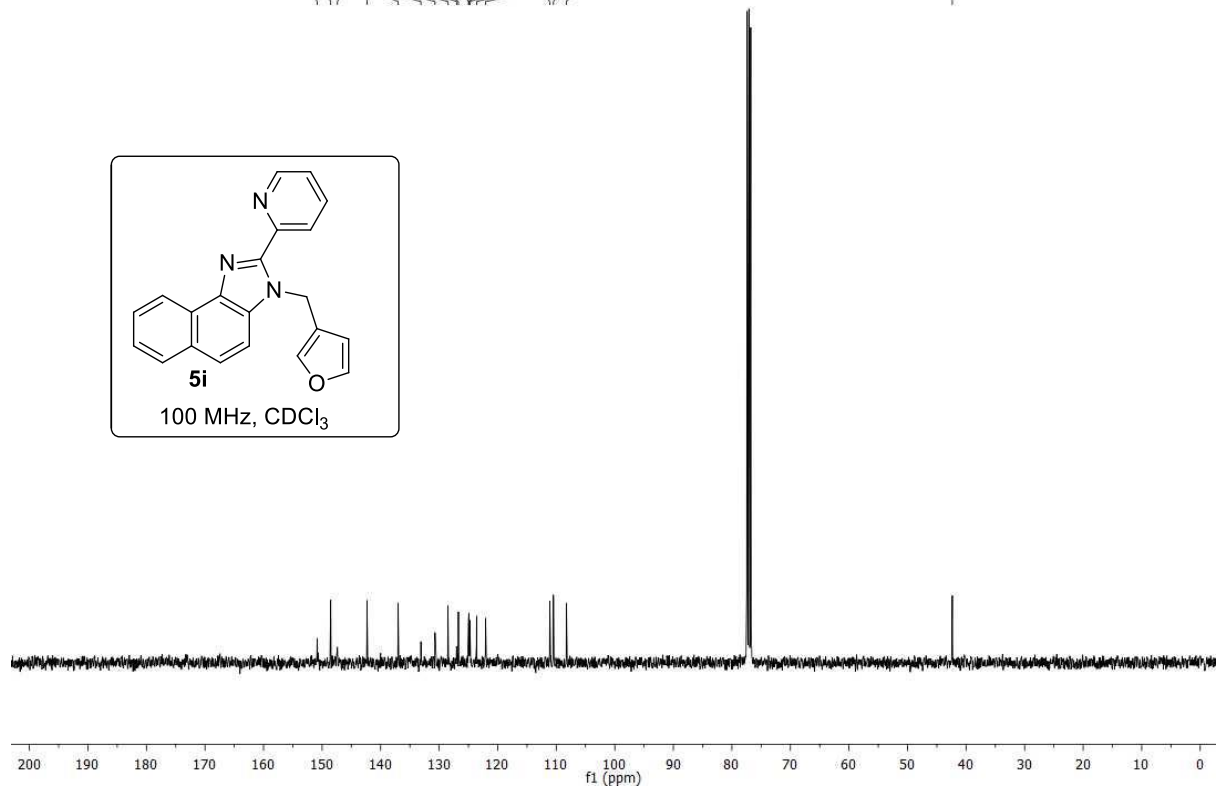

HM-783  
single\_pulse

8.763  
8.757  
8.670  
8.668  
8.666  
8.664  
8.658  
8.656  
8.654  
8.652  
8.651  
8.419  
8.417  
8.402  
8.399  
8.398  
8.396  
7.916  
7.882  
7.877  
7.863  
7.863  
7.868  
7.868  
7.868  
7.708  
7.686  
7.657  
7.655  
7.640  
7.637  
7.637  
7.636  
7.630  
7.617  
7.602  
7.580  
7.513  
7.510  
7.492  
7.492  
7.489  
7.475  
7.472  
7.331  
7.328  
7.319  
7.319  
7.312  
7.312  
7.300  
7.300  
7.297

1.798  
1.568  
1.537  
1.445  
1.416  
1.355

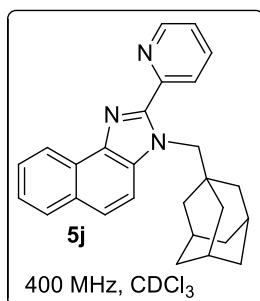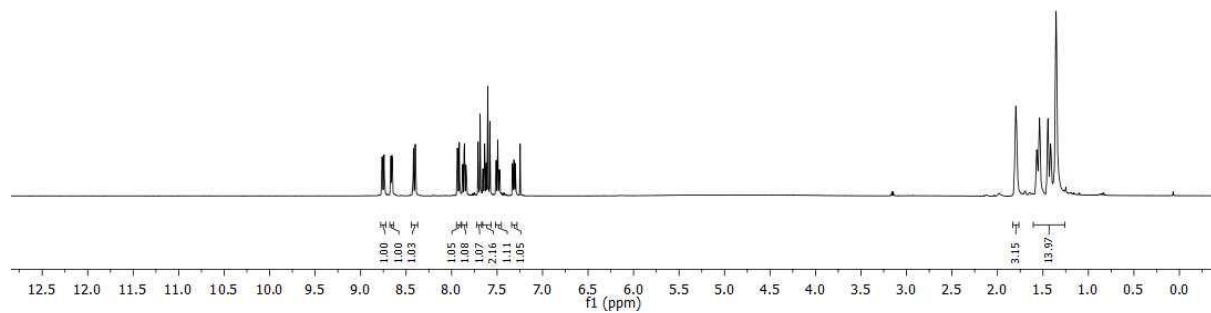

HM-783

single\_pulse decoupled gated NOE

151.966  
149.114  
148.374

137.118  
134.233  
130.407  
128.665

128.685  
127.088  
126.688  
124.784

123.519  
124.067  
122.015

112.379

55.842

40.988  
36.674  
36.629

28.269

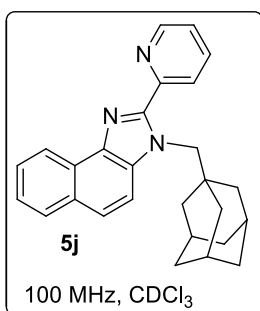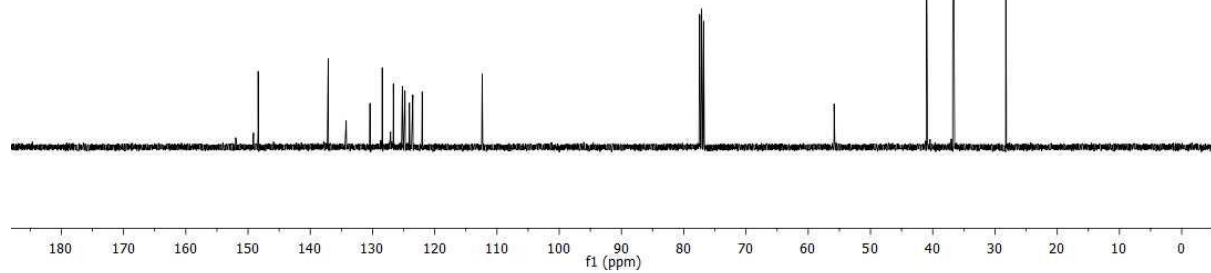

HM-787  
single\_pulse

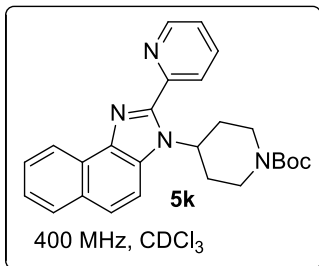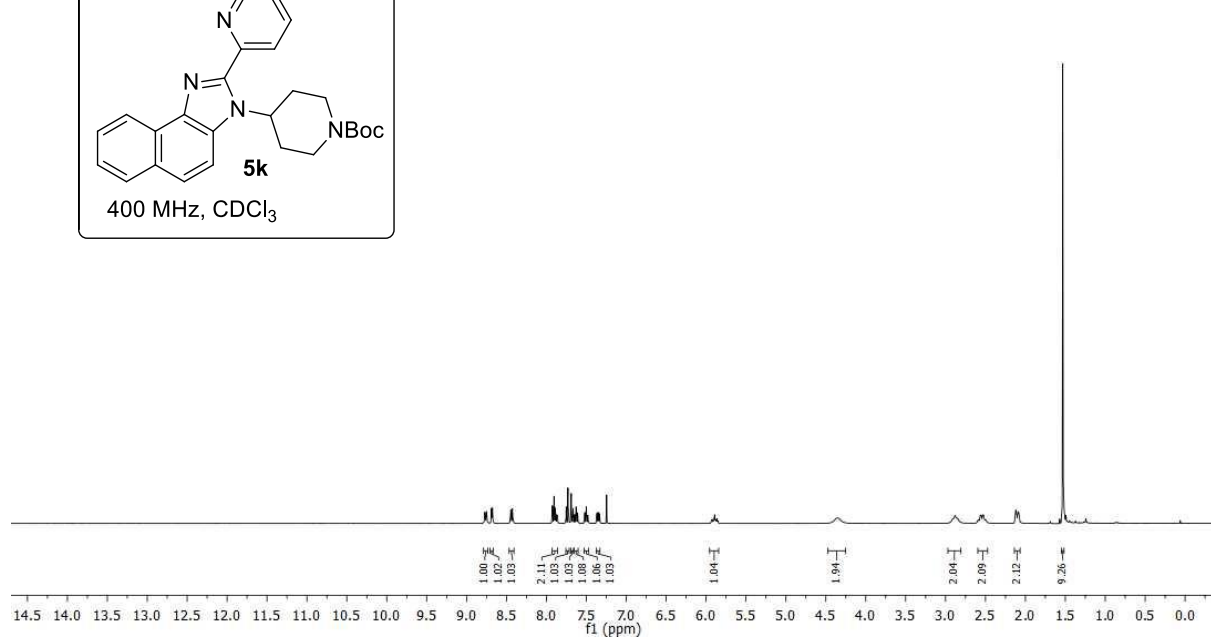

HM-787  
single\_pulse decoupled gated NOE

154.951  
148.794  
148.282  
137.175  
131.123  
130.146  
128.312  
126.769  
125.813  
124.266  
123.688  
122.150  
113.161  
80.089  
55.363  
30.779  
28.572

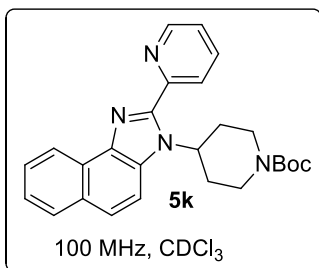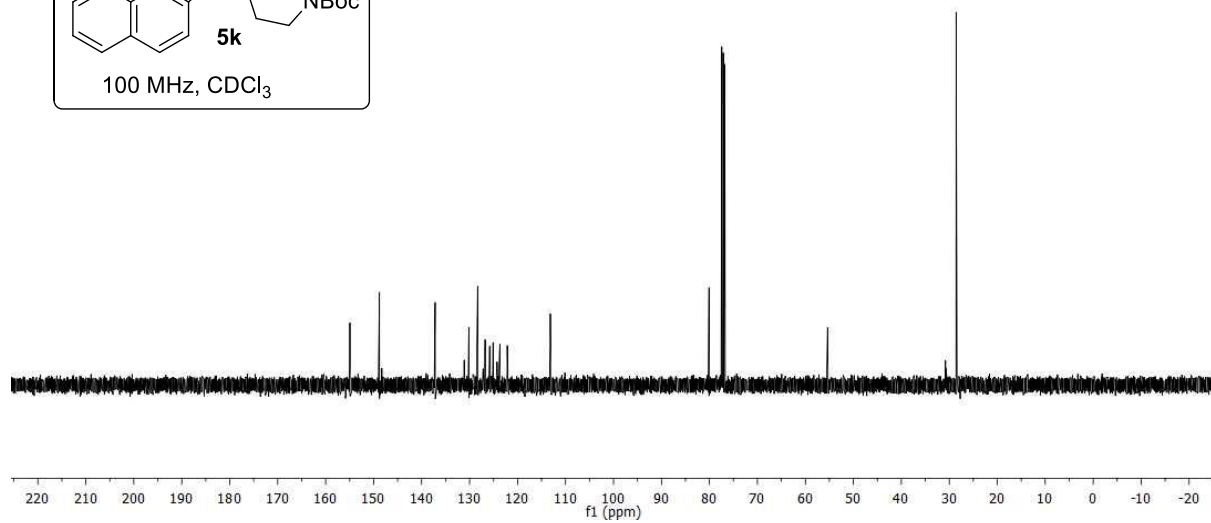



HM-786  
single\_pulse

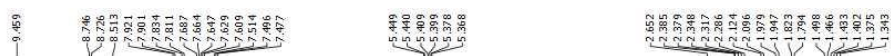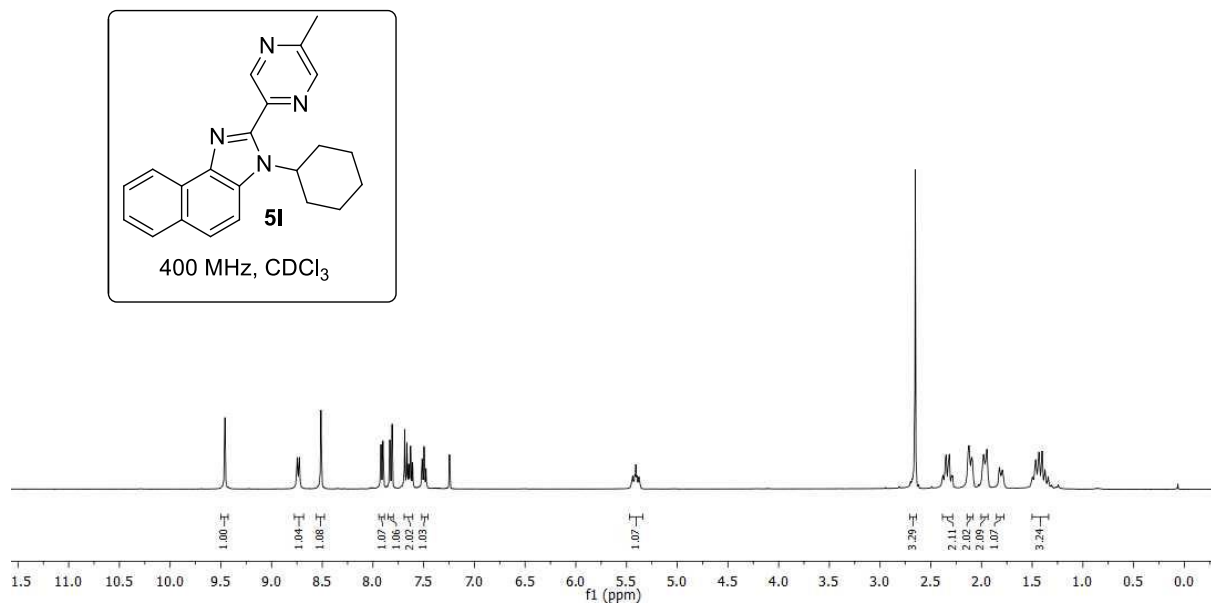

HM-786  
single pulse decoupled gated NOE

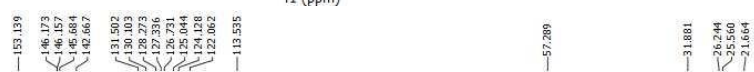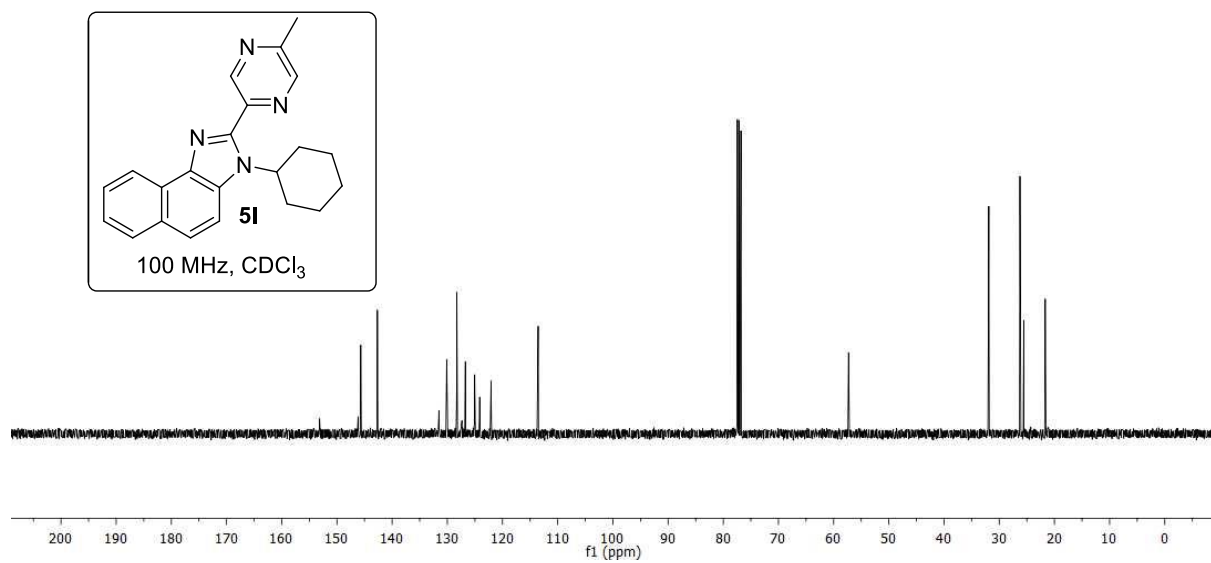

HM-785  
single pulse  
8.118  
8.106  
8.103  
8.099  
8.299  
8.124  
8.102  
7.942  
7.922  
7.888  
7.885  
7.884  
7.876  
7.866  
7.864  
7.759  
7.755  
7.752  
7.736  
7.732  
7.731  
7.709  
7.686  
7.667  
7.664  
7.650  
7.650  
7.644  
7.644  
7.639  
7.627  
7.604  
7.604  
7.601  
7.586  
7.586  
7.581  
7.566  
7.559  
7.556  
7.512  
7.509  
7.499  
6.129  
6.129  
6.088  
6.067  
6.057  
2.462  
2.460  
2.456  
2.457  
2.405  
2.396  
2.373  
2.365  
2.365  
2.376  
2.038  
2.038  
2.004  
1.863  
1.863  
1.588  
1.588  
1.501  
1.501  
1.463  
1.463  
1.399  
1.399

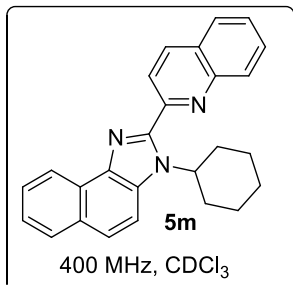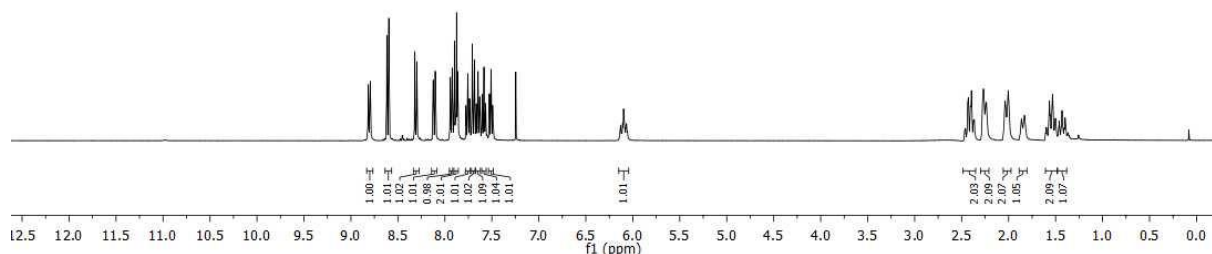

HM-785  
single pulse decoupled gated NOE

150.989  
148.316  
138.506  
136.506  
134.923  
131.923  
130.107  
129.835  
129.792  
128.297  
127.803  
127.803  
127.803  
127.488  
127.185  
126.606  
124.920  
124.920  
124.069  
122.910  
122.910  
122.910  
113.809  
-57.462  
-31.975  
-26.500  
-25.763

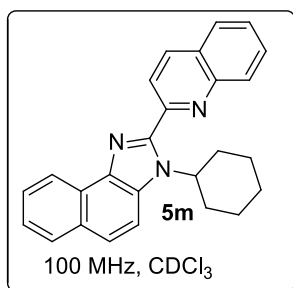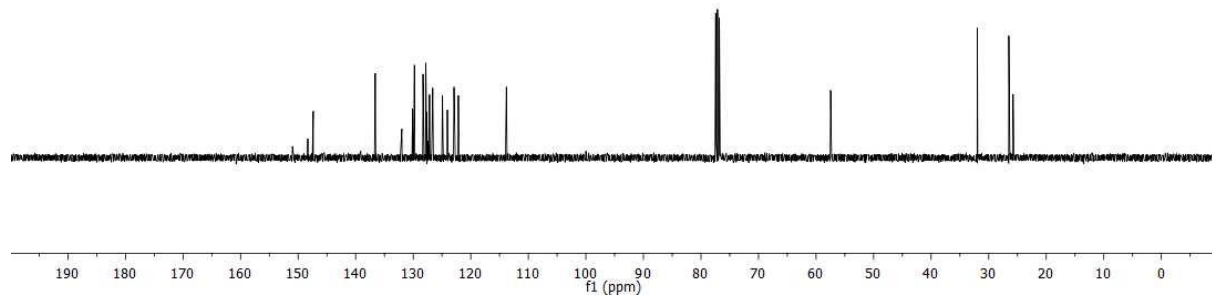



HM-832  
single pulse

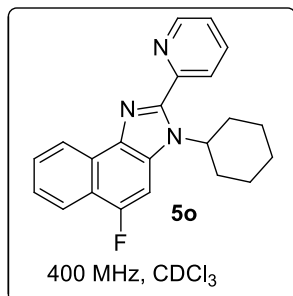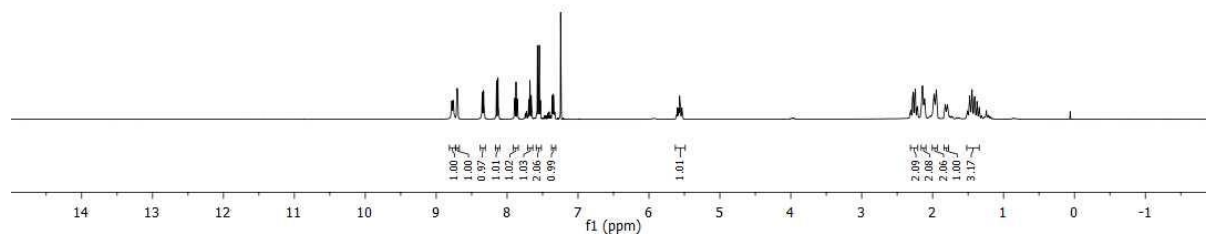

HM-832  
single pulse decoupled gated NOE

156.908  
154.454  
151.003  
148.863  
136.975  
130.003  
128.674  
128.585  
127.589  
127.408  
127.355  
126.887  
126.456  
125.023  
125.448  
121.352  
121.331  
120.918  
120.736  
98.290  
98.017  
57.209  
31.704  
26.217  
25.586

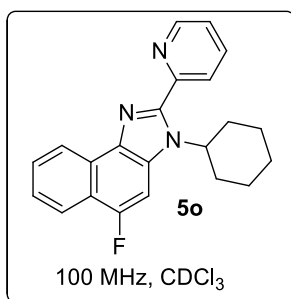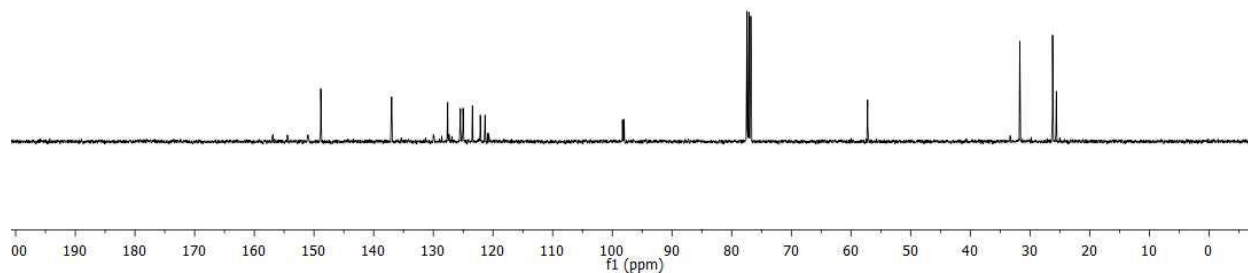

HM-832  
single pulse decoupled gated NOE

--126.542

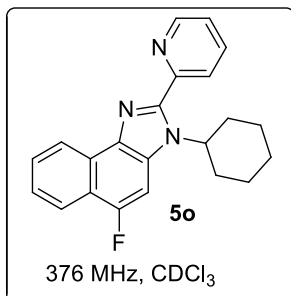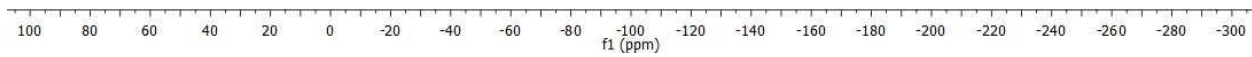

HM-831  
single\_pulse

8.954  
8.725  
8.722  
8.712  
8.711  
8.708  
8.475  
8.454  
8.033  
7.929  
7.928  
7.909  
7.891  
7.887  
7.688  
7.669  
7.659  
7.559  
7.556  
7.565  
7.545  
7.384  
7.373  
7.367  
7.354  
7.354  
5.586  
5.555  
5.555  
5.545  
5.536  
5.514  
5.504

2.814  
2.403  
2.367  
2.367  
2.345  
2.337  
2.306  
2.157  
2.156  
2.123  
1.995  
1.982  
1.874  
1.811  
1.799  
1.1517  
1.453  
1.429  
1.407  
1.375  
1.368

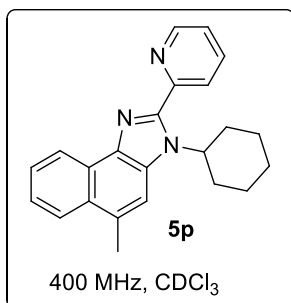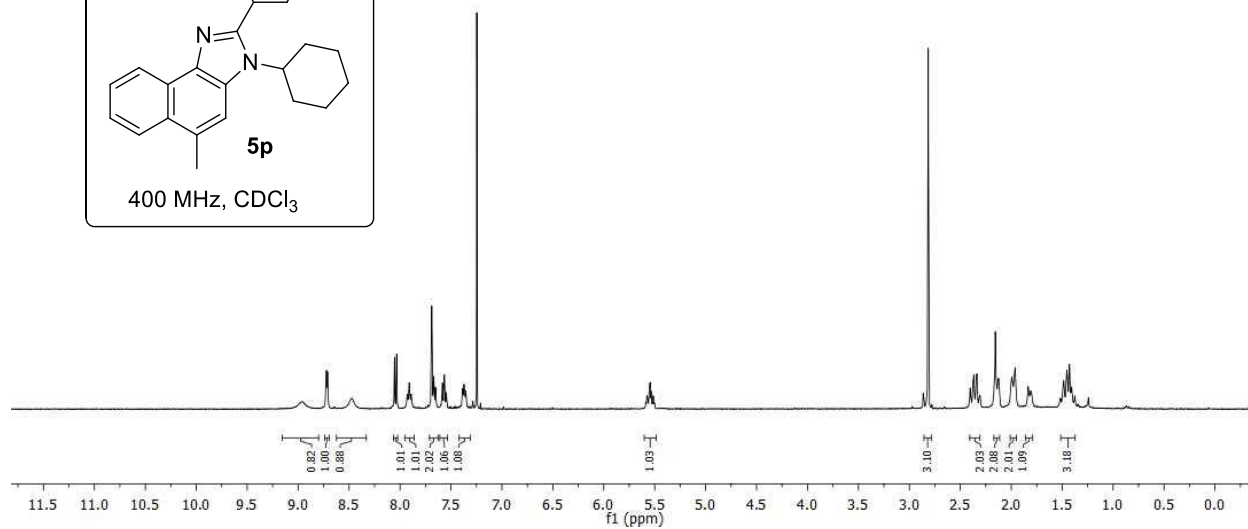

HM-831  
single pulse decoupled gated NOE

151.204  
148.036  
148.036  
137.807  
136.786  
131.107  
129.428  
129.428  
127.280  
126.297  
125.635  
124.748  
123.315  
122.844  
113.942

57.098

31.862  
26.288  
25.646  
20.736

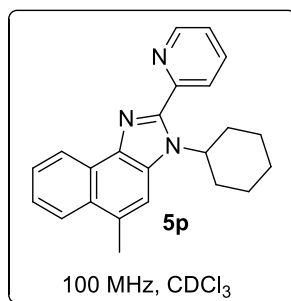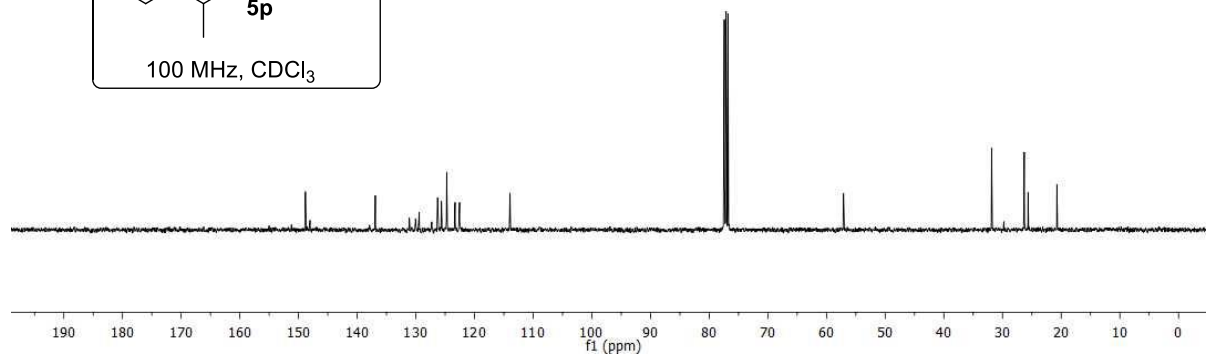

HM-817  
 Single pulse decoupled gated NOE

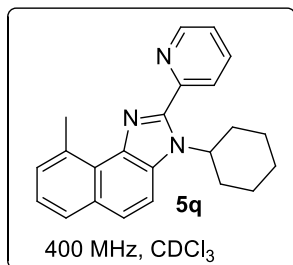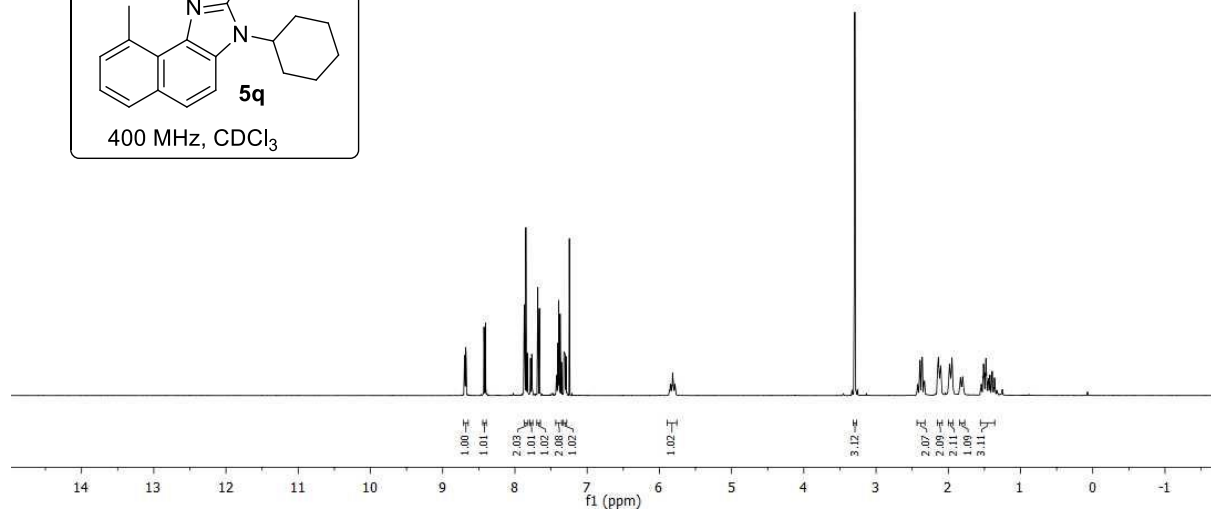

HM-817  
 Single pulse decoupled gated NOE

148.591  
 147.285  
 136.763  
 136.083  
 132.535  
 132.460  
 131.012  
 128.506  
 126.468  
 126.456  
 126.456  
 124.545  
 124.234  
 123.157  
 113.517  
 56.933  
 31.712  
 26.363  
 25.698  
 23.813

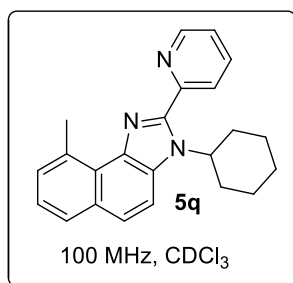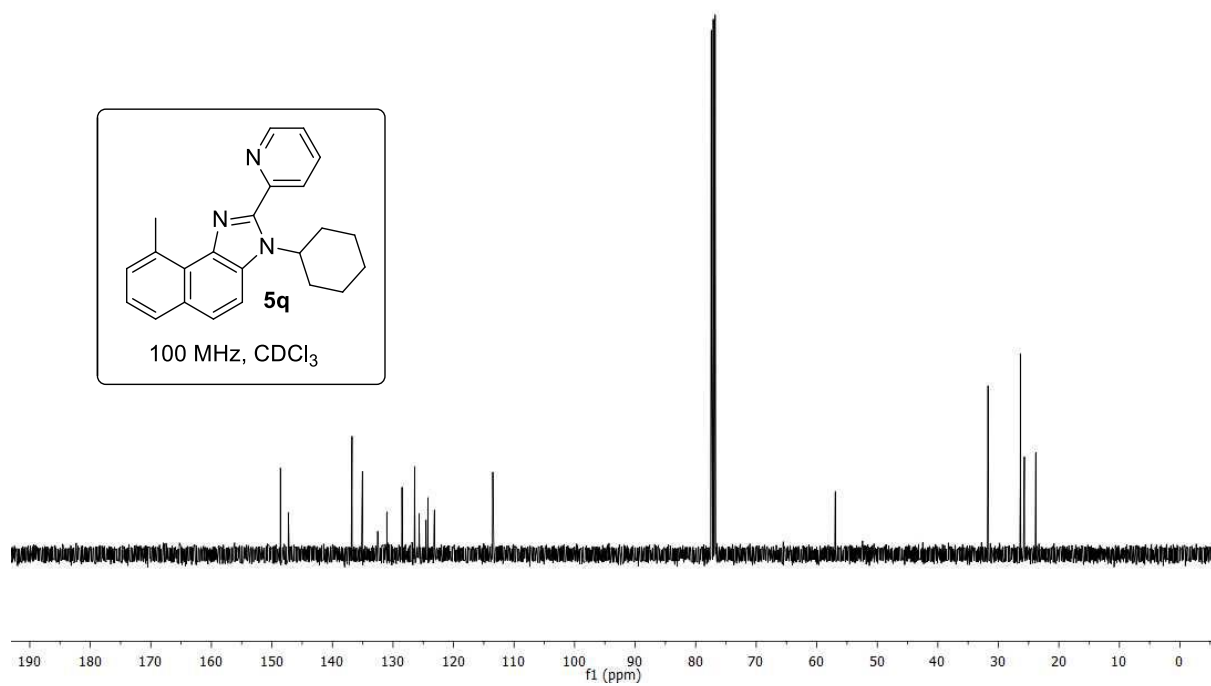

HM-793  
single\_pulse

8.855  
8.835  
8.731  
8.729  
8.727  
8.719  
8.717  
8.715  
8.713  
8.393  
8.373  
7.945  
7.912  
7.897  
7.893  
7.877  
7.873  
7.850  
6.987  
6.582  
6.577

5.622  
5.612  
5.581  
5.571  
5.540

2.335  
2.337  
2.296  
2.273  
2.265  
2.234  
2.233  
2.159  
2.133  
2.128  
1.949  
1.915  
1.776  
1.469  
1.464  
1.462  
1.459  
1.397  
1.384  
1.361  
1.301  
1.292

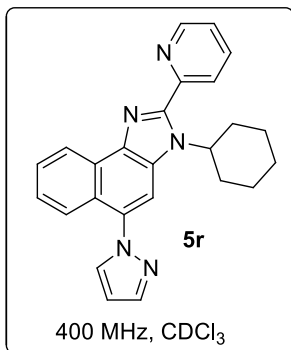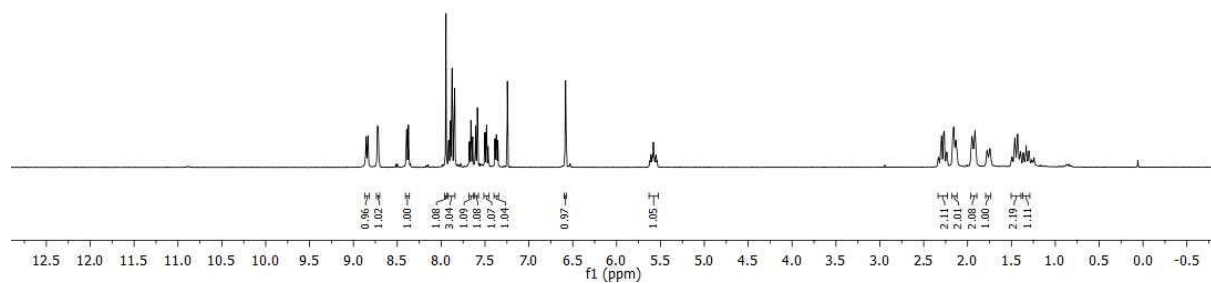

HM-793  
single\_pulse decoupled gated NOE

149.860  
148.866  
140.794  
137.084  
132.484  
129.874  
129.111  
127.725  
126.623  
125.979  
125.883  
123.829  
123.634  
122.466  
112.132  
106.507

57.542

31.998

26.179

25.388

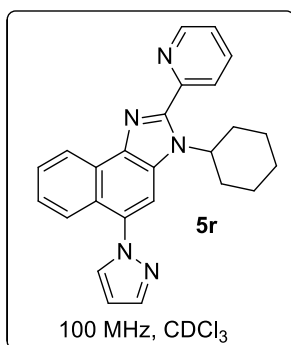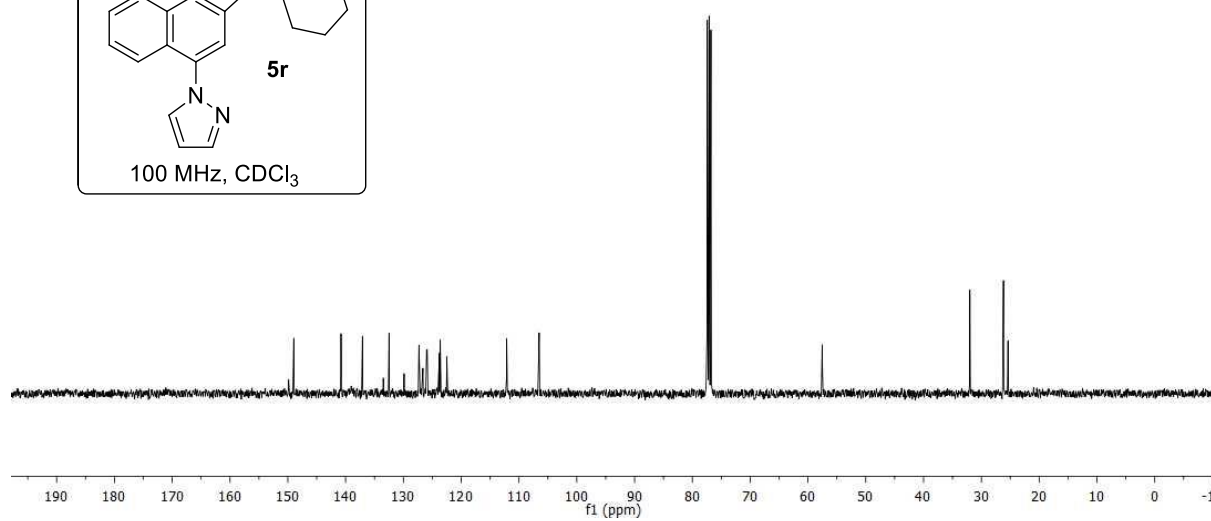



HM-803  
single pulse

2.331  
2.286  
2.285  
2.285  
2.256  
2.234  
2.225  
2.193  
2.184  
1.850  
1.802  
1.739  
1.707  
1.489  
1.481  
1.481  
1.384  
1.376  
1.310  
1.302  
1.269  
1.261  
1.228

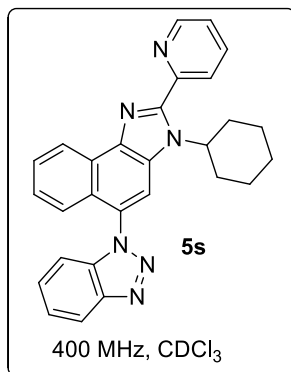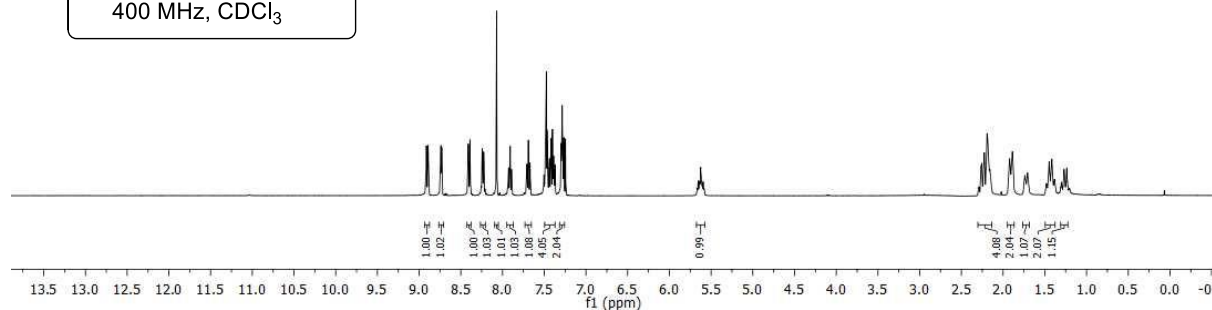

HM-803  
single pulse decoupled gated NOE

150.618  
150.504  
149.039  
146.825  
140.278  
137.142  
136.366  
130.026  
128.300  
128.102  
127.982  
127.882  
126.185  
125.961  
125.915  
124.624  
123.961  
123.168  
122.804  
113.647  
110.671

57.639

32.065  
26.144  
23.318

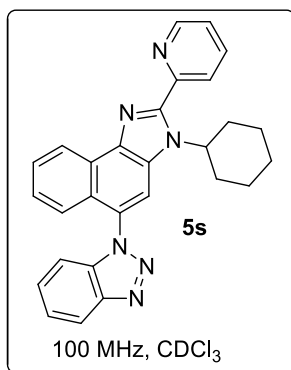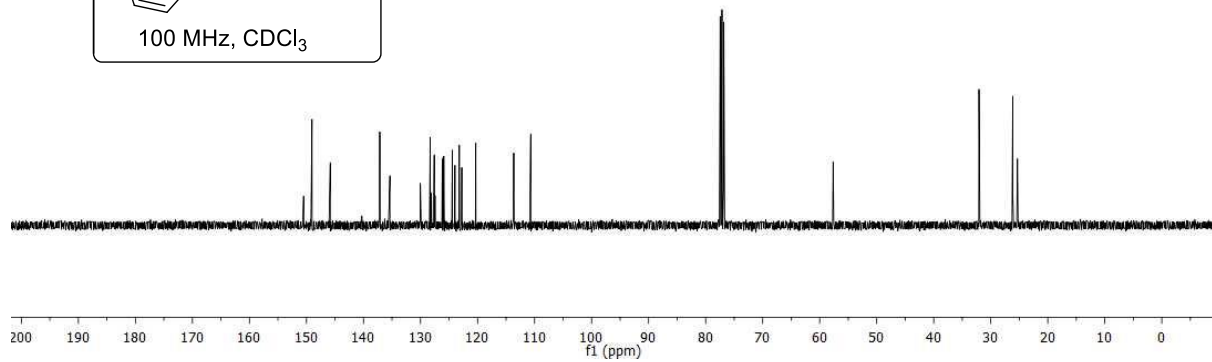

HM-1598  
single\_pulse

8.046  
8.026  
7.983  
7.982  
7.580  
7.544  
7.558  
7.547  
7.529  
7.526  
7.506  
7.484  
7.413  
7.411  
7.393  
7.376  
7.373

4.505  
4.496  
4.486  
4.476  
4.465  
4.443  
4.433  
4.424

2.282  
2.273  
2.262  
2.250  
2.187  
2.177  
1.991  
1.970  
1.962  
1.948  
1.936  
1.794  
1.588  
1.570  
1.546  
1.513  
1.480  
1.373  
1.358  
1.325  
1.317

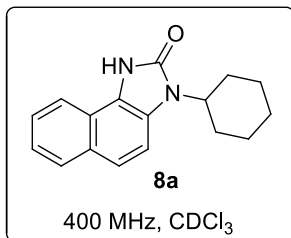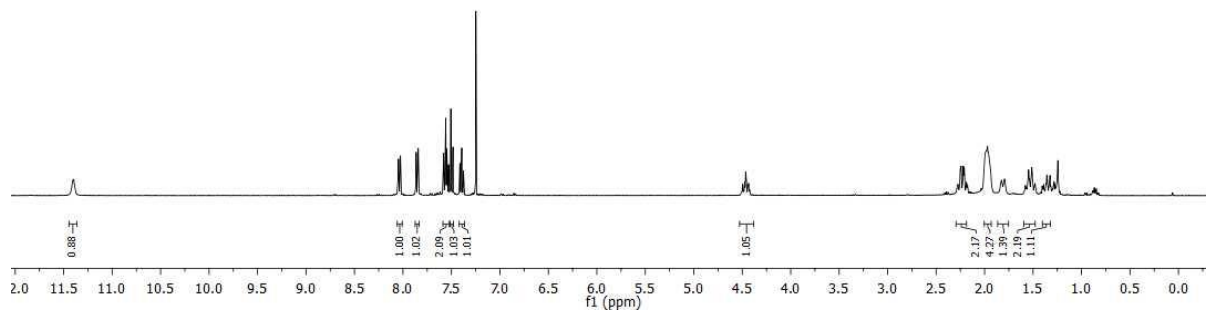

HM-1598  
single pulse decoupled gated NOE

155.351  
129.118  
128.630  
128.600  
128.570  
124.156  
122.467  
121.402  
120.622  
119.912  
110.923

53.133

30.814  
26.176  
25.548

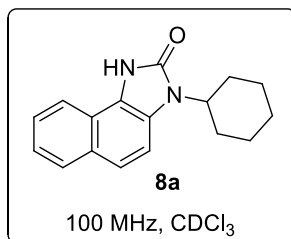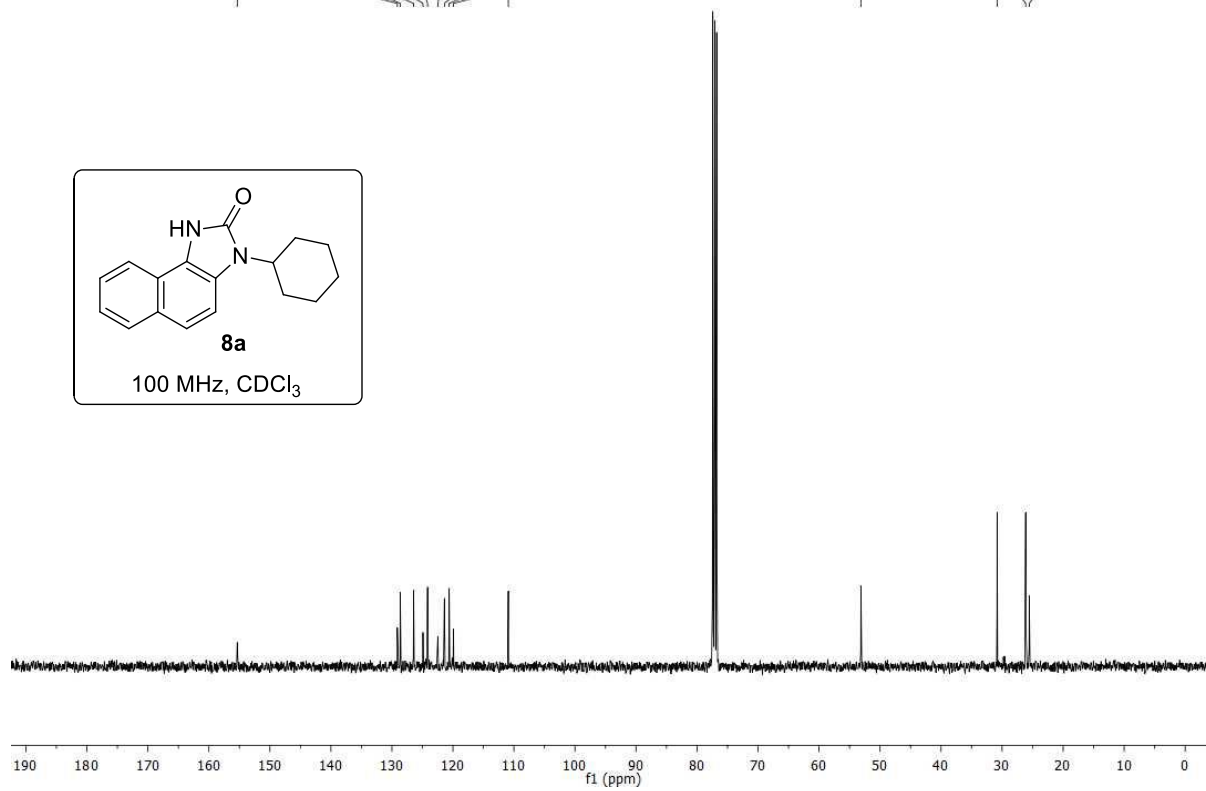

HM-1607  
single\_pulse

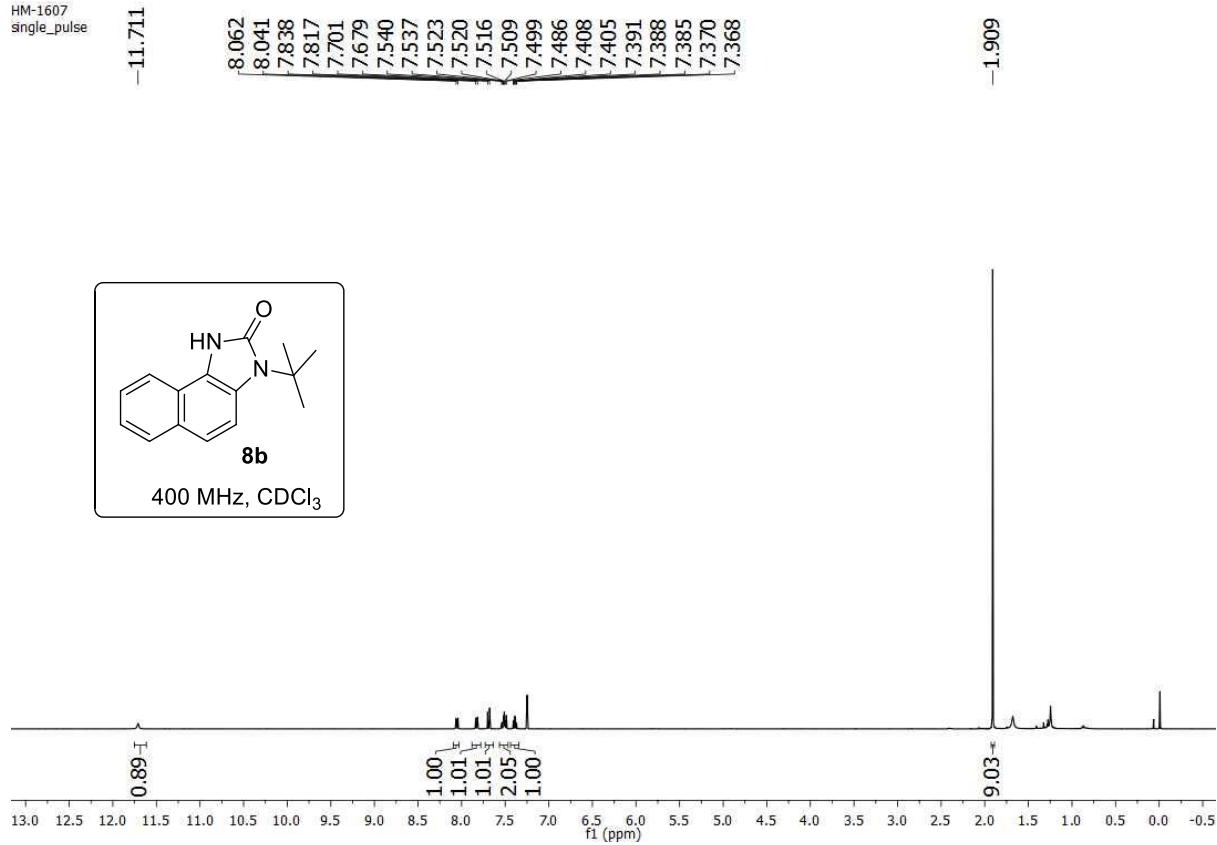

HM-1607  
single\_pulse decoupled gated

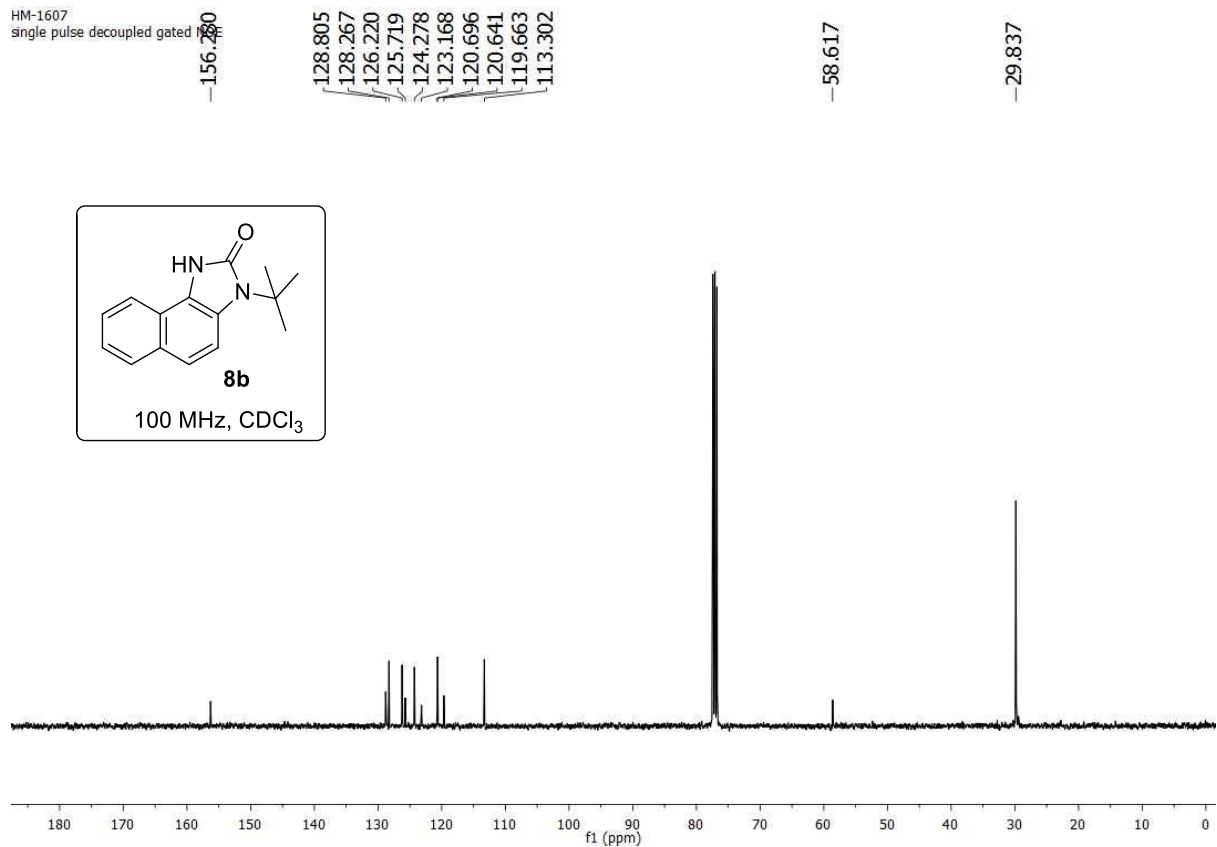

Supplement: d2sc01420c1.pdf [file d2sc01420c1.pdf]
